# Supplementary material for: eIF1A residues implicated in cancer stabilize translation preinitiation complexes and favor suboptimal initiation sites in yeast
Source: eLife journal article supplement (doi:10.7554/elife.31250), 2017-12-05
Supplement: supp [file elife-31250-supp-v1.zip]

Archive with 17 entries (17 files):
- elife_poa_e31250_Figure_6_figure_supplement_3.pdf
- elife_poa_e31250_Figure_5_figure_supplement_1.pdf
- elife_poa_e31250_Transparent_Reporting_File.docx
- elife_poa_e31250_Figure_4_source_data_1.xlsx
- elife_poa_e31250_Figure_4_figure_supplement_2.pdf
- elife_poa_e31250_Figure_3_source_data_1.xlsx
- elife_poa_e31250_Figure_2_figure_supplement_1.pdf
- elife_poa_e31250_Supplementary_File_2.xlsx
- elife_poa_e31250_Figure_6_figure_supplement_2.pdf
- elife_poa_e31250_Supplementary_File_1.doc
- elife_poa_e31250_Figure_3_figure_supplement_1.pdf
- elife_poa_e31250_Figure_6_figure_supplement_1.pdf
- elife_poa_e31250_Figure_2_source_data_1.xlsx
- elife_poa_e31250_Figure_4_figure_supplement_3.pdf
- elife_poa_e31250_Figure_6_figure_supplement_4.pdf
- elife_poa_e31250_Figure_4_figure_supplement_1.pdf
- elife_poa_e31250_Figure_5_source_data_1.xlsx
