# Supplementary material for: eIF1A residues implicated in cancer stabilize translation preinitiation complexes and favor suboptimal initiation sites in yeast
Source: eLife journal article supplement (doi:10.7554/elife.31250), 2017-12-05
Supplement: supp [file elife-31250-supp-v1.zip › elife_poa_e31250_Figure_2_source_data_1.xlsx]

## Sheet: Sheet1
Figure 2B
								AUG HIS4-lacZ Expression
																									Average	Std Error
WT+ vector		873	804	701	806	676																			772	40.8029
WT+ SUI3-2		2360	2248	2147	2076	1937	2023	1669	2196	1992	1987	1876	2016	2611	1704	1812	1501	1560	1533	1633	1609	1505	1942	1444	1886.13	65.7292
K3E+ SUI3-2		3025	2296	1677	2920	2095	1295	1752																	2151.43	263.258
K4D+ SUI3-2		1890	1859	2033	1986	1435	1305																		1751.33	136.313
T6D+ SUI3-2		1794	2025	1952	1982	1462	1602	1761																	1796.86	85.2578
T6R+ SUI3-2		1604	1532	1886	1942	1798	1813	2191																	1823.71	89.2559
DG8+ SUI3-2		2089	1916	1380	1321	1306	1254																		1544.33	162.029
R13P+ SUI3-2		1508	1909	1920	1908	1260	1636	1903																	1720.57	106.456
G15D+ SUI3-2		2210	1605	1973	2413	1268	1687	1743	1423																1790.25	146.86
								UUG HIS4-lacZ Expression
																						Average	Std Error
WT+ vector		21	23	25	20																	22.25	1.28171
WT+ SUI3-2		321	208	241	261	222	251	234	202	214	207	325	213	249	236	201	257	228	180	230	232	235.6	8.33611
K3E+ SUI3-2		146	204	203	103	130	129															152.5	18.7126
K4D+ SUI3-2		129	202	137	107	93	124	131														131.857	14.0849
T6D+ SUI3-2		183	221	216	179	161	205															194.167	10.5243
T6R+ SUI3-2		175	232	182	202	138	205	170														186.286	12.2782
DG8+ SUI3-2		134	156	140	123	133	104	143														133.286	6.70562
R13P+ SUI3-2		80	72	113	82	67	63															79.5	8.03392
G15D+ SUI3-2		145	171	156	151	131	181	114														149.857	9.30883
		AUG	UUG	UUG/AUG	SE of ratio	P-value
WT+ vector		772	22.25	0.0288212	0.0022	<0.0001
WT+ SUI3-2		1886.13	235.6	0.124912	0.0062
K3E+ SUI3-2		2151.43	152.5	0.0708831	0.012	0.0038
K4D+ SUI3-2		1751.33	131.857	0.0752896	0.0099	0.002
T6D+ SUI3-2		1796.86	194.167	0.108059	0.0078	0.1017
T6R+ SUI3-2		1823.71	186.286	0.102146	0.0083	0.0384
DG8+ SUI3-2		1544.33	133.286	0.0863063	0.01	0.0076
R13P+ SUI3-2		1720.57	79.5	0.0462056	0.0054	<0.0001
G15D+ SUI3-2		1790.25	149.857	0.0837074	0.0086	0.0017
Figure 2C
				Normalized eIF1 levels, relative to WT
	Biological replicate 1				Biological replicate 2				Biological replicate 3
	Technical replicate 1		Technical replicate 2		Technical replicate 1		Technical replicate 2		Technical replicate 1		Technical replicate 2
	(1X)	(2X)	(1X)	(2X)	(1X)	(2X)	(1X)	(2X)	(1X)	(2X)	(1X)	(2X)	Average	Std Error	P-value
WT	1	1	1	1	1	1	1	1	1	1	1	1	1
K3E	0.31	0.56	0.51	0.58	0.43	0.61	0.34	0.51	0.32	0.38	0.3		0.440909	0.0370528	<0.0001
K4D	0.33	0.53	0.54	0.55	0.44	0.71	0.35	0.44	0.42	0.33	0.39		0.457273	0.0367448	<0.0001
T6D	0.53	0.82	0.86	0.84	0.75	0.89	0.6	0.77	0.55	0.58	0.51		0.7	0.0463681	<0.0001
T6R	0.34	0.51	0.57	0.53	0.67	0.72	0.53	0.95	0.84	0.71	0.78		0.65	0.0550273	<0.0001
DG8	0.25	0.3	0.62	0.52	0.39	0.4	0.36	0.53	0.48	0.47	0.62	0.3	0.436667	0.0372024	<0.0001
R13P	0.09	0.08	0.23	0.13	0.15	0.11	0.14	0.14	0.16	0.11	0.21	0.07	0.135	0.0146868	<0.0001
G15D	0.15	0.24	0.38	0.41	0.32	0.31	0.3	0.41	0.32	0.25	0.41	0.16	0.305	0.0274991	<0.0001
Figure 2D
					SUI1-lacZ (native context) expression
													Average	Std Error	P-value
WT	221	238	210	232	229	246	235	244	252	226	216	219	230.667	3.90595
K3E	183	186	164	210	174	196	186						185.571	6.03501	<0.0001
K4D	157	192	183	199	185	164	216						185.143	8.22233	0.000460104
T6D	288	205	215	173	227	205							218.833	17.1456	0.491827
T6R	239	195	238	225	164	164							204.167	15.6246	0.12501
∆G8	184	185	167	177	202								183	6.41288	0.000148012
R13P	203	187	190	131	192	163							177.667	11.7975	0.00317443
G15D	170	168	198	156	134								165.2	11.6319	0.00187114
					SUI1-lacZ (poor context) expression
																				Average	Std Error	P-value
WT	225	137	160	173	150	144	149	161	160	180	163	152	208	227	165	197	147	170	171	170.474	6.18195
K3E	126	147	138	140	99	130	179													137	9.84117	0.0101213
K4D	120	140	126	125	136															129.4	4.14729	<0.0001
T6D	124	127	121	131	309	185	122													159.857	28.3846	0.706115
T6R	135	172	156	190	209	146														168	12.4872	0.852572
∆G8	169	172	167	159	124	136	122	142												148.875	7.74285	0.0346528
R13P	108	101	104	78	189	82	70													104.571	16.2956	0.00365828
G15D	128	148	140	161	91	108	111	90												122.125	9.97964	0.000750115
					SUI1-lacZ (optimum context) expression
																							Average	Std Error	P-value
WT	410	430	448	454	386	451	422	394	387	474	407	347	546	447	352	342	280	261	334	410	387	376	397.5	13.9739
K3E	466	401	388	423	410	332	429	367															402	15.4542	0.823028
K4D	314	420	485	333	522	419																	415.5	36.5051	0.632991
T6D	325	501	495	441	445																		441.4	35.344	0.252719
T6R	453	480	406	353	330	331	337																384.286	25.4655	0.637753
∆G8	433	475	350	501	419	471	465																444.857	20.3788	0.0630846
R13P	355	453	442	406	302	304	313	309															360.5	24.3058	0.186661
G15D	378	429	312	380	397	390	333																374.143	16.1443	0.26464
Figure 2-figure supplement 1C
				GCN4-lacZ Expression
													Average	Std Error	P-value
WT+ vector		57	50	55	50								53	2.05724	<0.0001
WT+ SUI3-2		133	136	170	130	120	134	122	123	152	145	162	138.818	5.24939
K3E+ SUI3-2		131	128	169	116	87	130						126.833	11.8508	0.347197
K4D+ SUI3-2		131	152	139	196	105	125						141.333	13.8588	0.858865
T6D+ SUI3-2		140	194	170	176								170	12.9768	0.06044
T6R+ SUI3-2		140	113	192	197								160.5	23.6005	0.370587
DG8+ SUI3-2		125	132	148	120								131.25	7.05384	0.367765
R13P+ SUI3-2		121	65	69	132	144	104	89	124	83			103.444	10.0584	0.00617112
G15D+ SUI3-2		168	124	122	111	117	175						136.167	12.4436	0.836924
