# Supplementary material for: eIF1A residues implicated in cancer stabilize translation preinitiation complexes and favor suboptimal initiation sites in yeast
Source: eLife journal article supplement (doi:10.7554/elife.31250), 2017-12-05
Supplement: supp [file elife-31250-supp-v1.zip › elife_poa_e31250_Figure_3_source_data_1.xlsx]

## Sheet: Sheet1
Figure 3B
								AUG HIS4-lacZ Expression
																									Average	Std Error
WT + vector		873.068	804.303	701.27	806.179	676.237																			772.211	40.7733
WT + SUI3-2		2234.82	2347.24	2466.16	1784.91	1528.98	1612.59	1643.88	1672.06	1988.69	1949.86	2008.34	1528.53	2006.89	2020.76	1850.23	2276.07	2161.13	2036.87	2610.47	2202.78	1841.57	1624.97	1804.03	1965.3	64.0833
K7A + SUI3-2		1717.07	1648.66	2006.22	1726.83																				1774.69	91.4571
K7D + SUI3-2		1860.96	1666.67	1546.06	1677.52																				1687.8	75.0893
∆G8∆G9 + SUI3-2		1508.17	1597.32	1520.68	1837.52																				1615.92	88.3806
K10A + SUI3-2		1303.5	1544.89	1590.35	1484.64																				1480.85	72.7813
K10D + SUI3-2		1876.31	1813.72	1713.73	1229.09																				1658.21	169.835
R13A + SUI3-2		1580.4	1996.48	1538.3	1256.7																				1592.97	176.291
R13D + SUI3-2		1798.86	1350.48	1377.57	1652.12																				1544.76	125.665
R14A + SUI3-2		1403.73	2061.34	1889.66	1555.77																				1727.62	174.071
R14D + SUI3-2		1290.71	1038.62	1462.04	1138.74	1295.3	1745.68	1662.75	1184.39																1352.28	95.0108
K16A+ SUI3-2		1521.67	1623.94	1810.15	1406.17																				1590.48	99.0433
K16D + SUI3-2		1267.56	1156.51	1709.07	1296.37	1104	1683.07	1389.91	1351.44																1369.74	84.2103
								UUG HIS4-lacZ Expression
																									Average	Std Error
WT + vector		20.6953	21.3826	23.2092	25.1737																				22.6152	1.16107
WT + SUI3-2		341.514	297.933	307.237	270.329	341.184	296.725	245.889	269.931	262.696	263.323	236.219	225.815	213.771	236.14	355.051	297.711	308.151	196.248	356.812	204.965	227.324	249.092	171.169	268.488	11.1146
K7A + SUI3-2		158.331	203.474	204.572	198.436																				191.203	12.7611
K7D + SUI3-2		111.964	151.692	173.808	205.504																				160.742	22.7219
∆G8∆G9 + SUI3-2		67.3446	69.3457	95.7028	66.269																				74.6655	8.14028
K10A + SUI3-2		134.618	79.3794	114.969	173.716																				125.67	22.747
K10D + SUI3-2		70.5132	102.749	93.9527	77.2754																				86.1225	8.57142
R13A + SUI3-2		88.6256	73.1789	81.2321	85.4364																				82.1183	3.86394
R13D + SUI3-2		63.5967	65.7087	49.7853	64.1836																				60.8186	4.28276
R14A + SUI3-2		98.4775	84.3001	72.4463	81.6693	72.4996	69.0986	84.935																	80.4895	4.14082
R14D + SUI3-2		51.9601	44.3848	56.0441	93.1315	50.4228	47.7975	53.0202	91.2799	65.7532	48.0757	48.3384	37.0357												57.2703	5.34171
K16A+ SUI3-2		131.445	131.994	163.591	174.469	145.894	155.583																		150.496	7.74243
K16D + SUI3-2		122.609	67.6389	83.2093	74.3168	87.03	52.1302	54.261	104.85	62.6896	73.0911	65.1735	74.518												76.7931	6.17204
		AUG	UUG	UUG/AUG	SE of ratio	P-value
WT + vector		772.211	22.6152	0.0292863	0.0022	<0.0001
WT + SUI3-2		1965.3	268.488	0.136615	0.0071
K7A + SUI3-2		1774.69	191.203	0.107739	0.0091	0.0252
K7D + SUI3-2		1687.8	160.742	0.0952372	0.0142	0.0309
∆G8∆G9 + SUI3-2		1615.92	74.6655	0.0462061	0.0056	<0.0001
K10A + SUI3-2		1480.85	125.67	0.084864	0.0159	0.029
K10D + SUI3-2		1658.21	86.1225	0.0519369	0.0074	<0.0001
R13A + SUI3-2		1592.97	82.1183	0.0515505	0.0062	<0.0001
R13D + SUI3-2		1544.76	60.8186	0.0393709	0.004	<0.0001
R14A + SUI3-2		1727.62	80.4895	0.0465897	0.0052	<0.0001
R14D + SUI3-2		1352.28	57.2703	0.0423509	0.0047	<0.0001
K16A+ SUI3-2		1590.48	150.496	0.0946228	0.0078	0.0026
K16D + SUI3-2		1369.74	76.7931	0.056064	0.0055	<0.0001
Figure 3C
							GCN4-lacZ Expression
															Average	Std Error	P-value
WT + vector		48.6744	48.4457	40.4132	41.6064										44.7849	2.53599	<0.0001
WT + SUI3-2		194.131	204.854	121.952	176.726	140.381	135.518	120.333	128.776	175.31	142.151	159.734	156.943	154.296	154.7	7.76712
K7A + SUI3-2		145.954	191.69	116.464	149.239										150.837	17.9	0.831984
K7D + SUI3-2		76.4878	77.0654	137.626	104.862										99.0103	16.734	0.0206289
∆G8∆G9 + SUI3-2		104.549	97.3608	113.933	140.152										113.999	10.8148	0.0107303
K10A + SUI3-2		78.6345	115.685	87.7028	92.0833										93.5265	9.13212	0.000327625
K10D + SUI3-2		113.437	87.2512	55.5436	75.037										82.8171	14.007	0.00298729
R13A + SUI3-2		122.996	78.5609	74.204	70.7885										86.6374	14.1312	0.00404654
R13D + SUI3-2		53.0418	55.2173	60.6818	58.7085										56.9124	1.98251	<0.0001
R14A + SUI3-2		108.946	142.232	149.443	117.476	107.838									125.187	9.69244	0.0268757
R14D + SUI3-2		50.7108	51.6904	47.3077	58.6933	80.8021	71.5901	63.2034	100.546						65.5679	6.8377	<0.0001
K16A+ SUI3-2		124.291	107.213	111.009	131.231										118.436	6.49793	0.00191253
K16D + SUI3-2		61.3335	72.2464	63.035	76.6636	70.3903	88.0585	92.943							74.9529	4.86951	<0.0001
Figure 3-figure supplement 1B
Luciferase assay results for AUG/AUG construct (RaugFFaug, p4490)
	FLUC				RLUC				Ratio FLUC/RLUC				Average_FLUC/RLUC		Normalization factor 1/Average_FLUC/RLUC
	1	2	3		1	2	3		1	2	3
WT	12495686	11754498	10455646		16211630	16342489	14425128		0.770785	0.71926	0.724822		0.738289		1.35448
SUI3-2	6922819	6788528	4243729		6965387	7062406	4533764		0.993889	0.96122	0.936028		0.963712		1.03765
SUI3-2/R13P	5.27169e+06	5476651	5066664		5.62739e+06	5665629	5589048		0.936791	0.966645	0.906534		0.936657		1.06763
SUI3-2/K16D	3837544	4181657	6149330		4895427	5094172	7023763		0.783904	0.820871	0.875504		0.826759		1.20954
	4	5	6		4	5	6		4	5	6
WT	5329707	5329697	11431601		7739844	7739484	15458489		0.688607	0.688637	0.739503		0.705582		1.41727
SUI3-2	32182096	6195011	9877260		39933869	6512025	9007465		0.805885	0.951319	1.09656		0.951256		1.05124
SUI3-2/R13P	6035043	5793155	6397032		6327677	5925694	6624806		0.953753	0.977633	0.965618		0.965668		1.03555
SUI3-2/K16D	2569483	3031692	6380014		3479504	3313589	6637396		0.738462	0.914927	0.961222		0.871537		1.1474
Luciferase assay results for UUG/AUG construct (RaugFFuug, p4493)
		FLUC				RLUC				Ratio FLUC/RLUC			Normalized FLUC/RLUC Ratio
	1	2	3		1	2	3		1	2	3		1	2	3
WT	793580	934536	1009893		14840168	17370298	18371724		0.0534751	0.0538008	0.05497		0.0724321	0.0728732	0.0744568
SUI3-2	1584908	1740105	2251506		3753086	4226759	5693094		0.422295	0.411688	0.39548		0.438173	0.427167	0.41035
SUI3-2/R13P	1502249	1365178	694120		8357508	6949390	4141280		0.179748	0.196446	0.16761		0.191899	0.209725	0.17894
SUI3-2/K16D	1236744	1349503	1264166		6642497	7473873	6656268		0.186187	0.180563	0.189921		0.225193	0.218391	0.22971
	4	5	6		4	5	6		4	5	6		4	5	6
WT	1043346	812737	1069489		18325822	14709949	18694986		0.0569331	0.0552508	0.0572073		0.080697	0.0783125	0.0810856
SUI3-2	1714048	1132169	664118		4222610	3520544	2312916		0.405921	0.321589	0.287135		0.426705	0.338055	0.301836
SUI3-2/R13P	1153227	1147667	1137672		6648209	6461432	6445102		0.173464	0.177618	0.176517		0.17964	0.183941	0.182801
SUI3-2/K16D	492990	1153955	528448		3041582	6008364	3611131		0.162083	0.192058	0.146339		0.185975	0.220367	0.167909
	Normalized FLUC/RLUC ratios
	1	2	3	4	5	6		Average	Stdv	Std Error
WT	0.0724321	0.0728732	0.0744568	0.080697	0.0783125	0.0810856		0.0766429	0.00389054	0.0015883
SUI3-2	0.438173	0.427167	0.41035	0.426705	0.338055	0.301836		0.390381	0.0564514	0.0230461
SUI3-2/R13P	0.191899	0.209725	0.17894	0.17964	0.183941	0.182801		0.187825	0.0116832	0.00476963
SUI3-2/K16D	0.225193	0.218391	0.22971	0.185975	0.220367	0.167909		0.207924	0.0249808	0.0101983
