# Supplementary material for: eIF1A residues implicated in cancer stabilize translation preinitiation complexes and favor suboptimal initiation sites in yeast
Source: eLife journal article supplement (doi:10.7554/elife.31250), 2017-12-05
Supplement: supp [file elife-31250-supp-v1.zip › elife_poa_e31250_Figure_4_figure_supplement_3.pdf]

# A

|                                           | GCN4-lacZ expression (U) |                    |                    | % translating GCN4-lacZ |                    |                    | % translating <i>el. uORF1</i> |                    |                    |
|-------------------------------------------|--------------------------|--------------------|--------------------|-------------------------|--------------------|--------------------|--------------------------------|--------------------|--------------------|
|                                           | (1)<br>WT                | (2)<br><i>K16A</i> | (3)<br><i>K16D</i> | (4)<br>WT               | (5)<br><i>K16A</i> | (6)<br><i>K16D</i> | (7)<br>WT                      | (8)<br><i>K16A</i> | (9)<br><i>K16D</i> |
| (1) Optimum: <b>AAA</b> AUG               | 8±0.5                    | 9±0.3              | 19±0.8(***)        | 0.7                     | 0.8                | 1.6                | 99.3                           | 99.2               | 98.4               |
| (2) Weak : <b>UAA</b> AUG                 | 130±8                    | 140±8              | 330±10(***)        | 11                      | 13                 | 28                 | 89                             | 87                 | 72                 |
| (3) Poor : <b>UUU</b> AUG                 | 410±34                   | 620±55(*)          | 760±68(**)         | 34                      | 56                 | 63                 | 66                             | 44                 | 37                 |
| (4) No <i>el. uORF1</i> : <b>AAA</b> :AGC | 1200±66                  | 1100±72            | 1200±104           | 100                     | 100                | 100                | <1                             | <1                 | <1                 |

# B

|                                           | GCN4-lacZ expression (U) |               |               | % translating GCN4-lacZ |               |               | % translating <i>el. uORF1</i> |               |               |
|-------------------------------------------|--------------------------|---------------|---------------|-------------------------|---------------|---------------|--------------------------------|---------------|---------------|
|                                           | (1)<br>hcWT              | (2)<br>hcΔ8Δ9 | (3)<br>hcK10D | (4)<br>hcWT             | (5)<br>hcΔ8Δ9 | (6)<br>hcK10D | (7)<br>hcWT                    | (8)<br>hcΔ8Δ9 | (9)<br>hcK10D |
| (1) Optimum: <b>AAA</b> AUG               | 8.1±0.4                  | 16±1.6(*)     | 20±1.1(**)    | 0.8                     | 1.8           | 2.0           | 99.2                           | 98.2          | 98            |
| (2) Weak : <b>UAA</b> AUG                 | 120±17                   | 330±3(**)     | 420±25(***)   | 12                      | 36            | 42            | 88                             | 64            | 58            |
| (3) Poor : <b>UUU</b> AUG                 | 460±52                   | 650±26(*)     | 690±47(*)     | 46                      | 72            | 69            | 54                             | 28            | 31            |
| (4) No <i>el. uORF1</i> : <b>AAA</b> :AGC | 1000±86                  | 900±50        | 1000±16       | 100                     | 100           | 100           | <1                             | <1            | <1            |

Figure 4-figure supplement 3
