# Supplementary material for: eIF1A residues implicated in cancer stabilize translation preinitiation complexes and favor suboptimal initiation sites in yeast
Source: eLife journal article supplement (doi:10.7554/elife.31250), 2017-12-05
Supplement: supp [file elife-31250-supp-v1.zip › elife_poa_e31250_Figure_4_source_data_1.xlsx]

## Sheet: Sheet1
Figure 4A
				Normalized eIF1 levels, relative to WT
	Biological replicate 1				Biological replicate 2				Biological replicate 3			Biological replicate 4
	Technical replicate 1		Technical replicate 2		Technical replicate 1		Technical replicate 2		Technical replicate 1		Tech.rep2	Technical replicate 1		Technical replicate 2
	(1X)	(2X)	(1X)	(2X)	(1X)	(2X)	(1X)	(2X)	(1X)	(2X)	(1X)	(1X)	(2X)	(1X)	(2X)	Average	Std Error	P-value
WT	1	1	1	1	1	1	1	1	1	1	1	1	1	1	1	1
K7A	0.83	0.95	0.9	0.58	0.7	0.6	0.73	0.44	0.58	0.38	0.34					0.639091	0.0646445	0.000160414
K7D	0.48	0.55	0.51	0.36	0.64	0.38	0.67	0.26	0.48	0.22	0.28					0.439091	0.0479052	<0.0001
DG8DG9	0.17	0.22	0.31	0.3	0.23	0.39	0.2	0.23								0.25625	0.0271005	<0.0001
K10A	0.41	0.44	0.44	0.27	0.38	0.29	0.4	0.12	0.28	0.1	0.16					0.299091	0.0401361	<0.0001
K10D	0.33	0.52	0.36	0.25	0.34	0.26	0.36	0.1	0.24	0.08	0.14					0.270909	0.0412905	<0.0001
R13A	0.2	0.38	0.23	0.32	0.25	0.3	0.12	0.22	0.37							0.265556	0.0299015	<0.0001
R13D	0.23	0.35	0.26	0.29	0.22	0.16	0.1	0.11	0.21							0.214444	0.0288916	<0.0001
R14A	0.14	0.37	0.16	0.44	0.31	0.45	0.28	0.44								0.32375	0.0469014	<0.0001
R14D	0.21	0.35	0.24	0.29	0.28	0.23	0.13	0.08	0.23	0.09	0.27	0.19	0.27	0.07	0.13	0.204	0.022964	<0.0001
K16A	0.26	0.56			0.49	0.76			0.29	0.67						0.505	0.0898332	0.00179716
K16D	0.3	0.41	0.34	0.35	0.3	0.42	0.14	0.15	0.13	0.15	0.14	0.18	0.22	0.53		0.268571	0.0357151	<0.0001
Figure 4B
				SUI1-lacZ (native context) expression
																															Average	Std Error	P-value
WT	278.929	254.906	162.733	166.839	209.323	208.496	225.42	199.599	211.449	216.648	155.549	175.015	165.882	180.869	269.917	173.064	226.988	163.746	132.239	194.705	166.641	209.629	186.324	200.315	219.944	211.76	185.329	197.274	200.227	193.185	198.098	6.12035
DG8DG9	141.724	126.72	132.115	138.7																											134.815	3.88688	<0.0001
K10A	116.691	126.821	140.239	169.593																											138.336	13.2726	0.00628765
K10D	117.205	138.617	108.982	93.7084																											114.628	10.8223	0.000318608
R13A	173.802	166.212	177.057	134.029																											162.775	11.3848	0.0243801
R13D	108.291	94.7309	139.916	141.483																											121.105	13.4692	0.00237061
R14A	140.785	116.625	193.676	183.202	142.947	124.53	118.044																								145.687	12.6883	0.00296868
R14D	170.449	104.906	137.851	121.941	122.427	143.408	132.289	156.529																							136.225	7.86105	<0.0001
K16A	109.779	107.045	154.507	170.907	146.638	173.971	152.168	110.705	183.878	177.842	154.776																				149.292	8.948	0.000133634
K16D	118.593	132.56	137.222	103.779	141.927	112.381	127.751	106.674	103.629	123	119																				120.592	4.21029	<0.0001
				SUI1-lacZ (poor context) expression
											Average	Std Error	P-value
WT	185.541	170.662	163.265	184.479	159.925	165.114	179.659	188.203	178	130.529	170.538	5.73703
DG8DG9	100.151	110.411	94.1363	96.7126							100.353	4.12941	<0.0001
K10A	135.122	118.382	98.026	97.8229							112.338	10.4002	0.00211831
K10D	88.4989	84.8974	98.9759	106.452	86.9143	115.467					96.8675	5.49419	<0.0001
R13A	85.7453	116.544	105.244	106.525							103.515	7.44415	<0.0001
R13D	66.0444	76.7009	63.2506	82.7022							72.1745	5.26124	<0.0001
R14A	112.323	130.567	133.276								125.389	8.08235	0.0029719
R14D	77.3127	89.6744	106.414	64.8569	103.721	150.986	95.5312				98.3566	11.1929	0.000144674
K16A	157.248	179.678	169.176	105.765	129.208	179.904	105.778				146.679	13.3958	0.114748
K16D	84.9025	66.8186	74.3756	74.335	120.998	109	101	86	154		96.8256	9.27098	<0.0001
				SUI1-lacZ (optimum context) expression
																												Average	Std Error	P-value
WT	326.333	327.067	342.469	441.376	322.207	517.311	336.436	353.897	278.365	293.938	318.326	380.502	331.871	277.78	310.22	363.008	449.993	270.043	398.964	354.556	414.637	365.49	293.04	309.054	449.877	594.598	301.096	360.091	15.0687
DG8DG9	453.725	350.919	316.27	383.052																								375.992	33.8494	0.649648
K10A	457.104	313.324	298.494	396.217																								366.284	42.9259	0.884327
K10D	409.269	206.156	564.24	264.911																								361.144	92.5134	0.990438
R13A	252.995	349.246	365.658	425.263																								348.291	41.2914	0.77504
R13D	314.71	283.868	350.945	300.363																								312.472	16.5189	0.0401913
R14A	383.304	303.115	608.106	383.807	362.538	370.344																						401.869	47.1174	0.392475
R14D	340.228	486.953	360.985	333.552	364.558	392.652	429.146	436.984																				393.132	20.3126	0.18846
K16A	296.754	368.221	402.199	570.38	365.179	387.694	321.315	274.075																				373.227	34.5144	0.719086
K16D	489.44	459.661	397.736	409.022	308.695	291.601	294.926	352.759	341.559	333.796	315.606	300.381																357.932	20.0477	0.929722
Figure 4C
				opt el. uORF1 GCN4-lacZ Expression
									Average	Std Error	P-value
WT	7.6827	7.38789	6.11171	10.3432	8.39098	9.43414	6.94395	8.10203	8.04958	0.480016
R13P	22.2748	21.3104	19.8848	22.6137					21.5209	0.611978	<0.0001
R14A	16.1121	14.7669	13.3856	17.4627					15.4318	0.877428	0.000795829
				weak el. uORF1 GCN4-lacZ Expression
									Average	Std Error	P-value
WT	135.045	118.837	100.837	105.67	157.499	140.901	129.745		126.933	7.56059
R13P	314.906	263.641	262.025	256.029					274.15	13.6997	0.000258289
R14A	197.625	206.629	230.344	239.367					218.491	9.8114	0.000216971
				poor el. uORF1 GCN4-lacZ Expression
												Average	Std Error	P-value
WT	422.506	493.25	523.04	481.42	462.904	222.038	519.141	411.345	198.445	328.657	395.791	405.322	33.9148
R13P	1143.95	746.864	791.562	798.236	704.871	783.514	1097.33					866.618	66.8656	0.000159417
R14A	733.546	660.865	945.212	664.451	630.215	540.373	626.566					685.89	48.3928	0.000514045
				No el. uORF1 GCN4-lacZ Expression
									Average	Std Error	P-value
WT	1446.06	1056.44	1412.01	1188.51	1248.77	1027.18	1156.7	909.646	1180.66	65.8355
R13P	1146.49	1112.01	1229.27	1291.04					1194.7	40.5007	0.859266
R14A	1077.81	1015.53	979.141	980.86					1013.33	23.0947	0.0411161
Figure 4-figure supplement 1A
				Normalized eIF1 levels, relative to WT
		Biological replicate 1				Biological Replicate 2				Biological replicate 3
		Technical replicate 1		Technical replicate 2		Technical replicate 1		Technical replicate 2		Technical replicate 1
		(1X)	(2X)	(1X)	(2X)	(1X)	(2X)	(1X)	(2X)	(1X)	(2X)	(1X)	Average	Std Error	P-value
WT		1	1	1	1	1	1	1	1	1	1	1	1
hcWT		1.05	0.74	1.13	0.98	0.82	0.9	0.68	0.61	0.53	0.43	0.57	0.767273	0.0720568	0.0069158
hcK4D		0.47	0.55	0.48	0.62	0.36	0.58	0.28	0.4	0.51			0.472222	0.0386805	<0.0001
hcDG8		0.67	0.55	0.63	0.62	0.2	0.35	0.16	0.24	0.48			0.433333	0.070578	<0.0001
hcDG8DG9		0.31	0.44	0.23	0.4	0.07	0.13	0.05	0.09	0.29	0.22		0.223	0.0458406	<0.0001
hcK10D		0.17	0.16	0.12	0.15	0.1	0.12	0.08	0.08	0.11			0.121111	0.0116518	<0.0001
Figure 4-figure supplement 1B
					SUI1-lacZ (native context) expression
																					Average	Std Error	P-value
WT		246.847	153.295	254.022	223.624	265.989	248.09	208.809	337.898	162.124	209.894	190.752	211.383	192.643	215.48	206.655	212.67	263.109	165.331	197.25	219.256	10.2513
hcWT		216.813	184.594	239.408	210.827																212.911	13.0262	0.683503
hcK4D		143.654	126.535	146.418	152.926	136.929															141.292	5.02502	<0.0001
hcDG8		154.413	142.904	163.663																	153.66	7.37587	<0.0001
hcDG8DG9		198.541	101.387	219.622	163.333	103.167	162.473	171.731	157.091	165.053	177.195	181.548	143.467	162.428	135.763	134.648	155.841				158.331	7.9326	<0.0001
hcK10D		112.71	99.1022	159.738	116.636																122.047	15.1598	0.000574689
					SUI1-lacZ (poor context) expression
												Average	Std Error	P-value
WT		163.783	182.847	174.179	215.907	180.52	187.35	168.85	160.198	181.524	195.15	181.031	5.4277
hcWT		200.736	174.824	134.891	226.838							184.322	22.6607	0.8801
hcK4D		144.88	146.869	145.421	136.969	143.918	146.564					144.103	1.63688	<0.0001
hcDG8		142	176.235	148.204	145.084	155.383						153.381	6.8533	0.00664247
hcDG8DG9		90.4171	88.0958	108.742	100.564							96.9546	5.51595	<0.0001
hcK10D		159.638	65.6321	78.7309	85.1549							97.289	24.4813	0.0253628
					SUI1-lacZ (optimum context) expression
																		Average	Std Error	P-value
WT	338.754	336.906	404.084	381.88	447.526	536.336	270.627	397.178	324.523	380.456	388.241	412.032	326.08	467.779	324.993	374.111	372.72	381.425	15.7202
hcWT	348.02	467.299	306.72	390.445														378.121	39.6403	0.933816
hcK4D	354.708	381.606	457.561	374.665														392.135	26.0596	0.707254
hcDG8	458.105	356.423	539.764	549.548	377.245	247.358	309.666											405.444	46.8185	0.616248
hcDG8DG9	410.332	359.407	349.974	383.275														375.747	15.5964	0.785138
hcK10D	319.041	269.775	257.226	302.183	365.71	410.847												320.797	26.1697	0.0597773
Figure 4-figure supplement 2C
						AUG HIS4-lacZ Expression
													Average	Std Error
WT + SUI3-2		1679	2038.31	1555.6	1911.88	2243.16	2069.07	2153.39	2865.99	1852.21	1757.43	1478.07	1964.01	121.988
hcWT + SUI3-2		1653.71	1851.64	1692.3	1649.71								1711.84	55.0036
hcK4D + SUI3-2		1186.68	1442.71	1398.59									1342.66	97.072
hcG∆8 + SUI3-2		1377.37	2144.15	1504.78	1539.14								1641.36	197.886
hcG∆8∆G9+SUI3-2		1288.49	2194.96	1943.36	1253.05								1669.97	273.107
hcK10D + SUI3-2		1327.36	1118.96	956.185	1400.38								1200.72	116.748
hcWT+ Vector		845.837	920.364	780.057	715.696								815.488	50.7594
						UUG HIS4-lacZ Expression
																	Average	Std Error
WT + SUI3-2		236.728	233.893	247.07	300.991	442.499	354.302	372.526	291.671	340.777	441.027	229.137	275.412	314.235	241.795	201.093	301.544	20.2467
hcWT + SUI3-2		319.327	238.781	348.572	273.961												295.16	28.0508
hcK4D + SUI3-2		108.941	126.078	110.508	121.805	92.1499	96.7135	116.546	93.5748								108.289	4.92551
hcG∆8 + SUI3-2		163.666	145.733	123.008	108.957	81.7337	117.616	94.9357	95.8153								116.433	10.4044
hcG∆8∆G9+SUI3-2		50.2616	72.65	82.4511	77.7269	52.5306	58.872	50.7643	53.0982								62.2944	5.00279
hcK10D + SUI3-2		55.6245	63.7061	64.6242	47.0464	42.5216	48.3584	45.337	39.2145								50.8041	3.60376
hcWT+ Vector		33.6999	34.313	27.0349	30.6635												31.4278	1.9278
		AUG	UUG	UUG/AUG	SE of ratio	P-value
WT + SUI3-2		1964.01	301.544	0.153535	0.0139
hcWT + SUI3-2		1711.84	295.16	0.172423	0.017	0.41
hcK4D + SUI3-2		1342.66	108.289	0.080653	0.0069	0.0009
hcG∆8 + SUI3-2		1641.36	116.433	0.0709371	0.0105	0.0008
hcG∆8∆G9+SUI3-2		1669.97	62.2944	0.0373028	0.0067	<0.0001
hcK10D + SUI3-2		1200.72	50.8041	0.0423113	0.005	<0.0001
hcWT+ Vector		815.488	31.4278	0.0385386	0.0034	<0.0001
Figure 4-figure supplement 2D
						GCN4-lacZ Expression
													Average	Std Error	P-value
WT + SUI3-2		194.088	154.66	124.366	134.243	144.461	172.357	182.094	128.649	122.852	162.308	121.938	149.274	8.10364
hcWT + SUI3-2		192.238	167.514	189.886	147.818								174.364	12.0882	0.0975582
hcK4D + SUI3-2		129.056	110.296	108.699	109.046	95.1697	70.5049	85.3956					101.167	7.82432	0.000362679
hcG∆8 + SUI3-2		97.5992	92.8671	114.083	114.891	84.2732	105.678	98.0462	114.091				102.691	4.28705	<0.0001
hcG∆8∆G9+SUI3-2		92.7074	59.7459	97.754	72.5923	81.1291	64.7601	88.5049	69.3572				78.3189	5.22563	<0.0001
hcK10D + SUI3-2		80.551	66.1024	86.2913	72.2987	55.0818	64.1905	67.3542	60.7539				69.078	3.88367	<0.0001
hcWT+ Vector		62.7068	56.8758	87.5643									69.049	11.5586	0.00109022
Figure 4-figure supplement 3A
				opt el. uORF1 GCN4-lacZ Expression
									Average	Std Error	P-value
WT	7.6827	7.38789	6.11171	10.3432	8.39098	9.43414	6.94395	8.10203	8.04958	0.480016
K16A	7.85231	9.24031	8.84973	9.31903					8.81535	0.337411	0.220421
K16D	17.1099	20.9673	19.0875	19.2955					19.1151	0.790707	<0.0001
				weak el. uORF1 GCN4-lacZ Expression
									Average	Std Error	P-value
WT	135.045	118.837	100.837	105.67	157.499	140.901	129.745		126.933	7.56059
K16A	129.611	129.817	137.668	164.906					140.501	8.35843	0.265334
K16D	323.251	343.785	310.292						325.776	9.77981	<0.0001
				poor el. uORF1 GCN4-lacZ Expression
												Average	Std Error	P-value
WT	422.506	493.25	523.04	481.42	462.904	222.038	519.141	411.345	198.445	328.657	395.791	405.322	33.9148
K16A	738.908	872.777	550.844	583.003	417.966	608.386	558.818					618.672	55.381	0.00775245
K16D	819.268	1011.66	894.697	446.56	678.406	695.609	800.733					763.847	68.2276	0.00111289
				No el. uORF1 GCN4-lacZ Expression
									Average	Std Error	P-value
WT	1446.06	1056.44	1412.01	1188.51	1248.77	1027.18	1156.7	909.646	1180.66	65.8355
K16A	1147.28	960.718	1062.93	1304.8					1118.93	72.841	0.547083
K16D	1210.46	1001.43	1042.63	1459.81					1178.58	104.194	0.987087
Figure 4-figure supplement 3B
		opt el. uORF1 GCN4-lacZ Expression
						Average	Std Error	P-value
hc WT		7.49762	8.05089	9.32758	7.50976	8.09646	0.43068
hc G∆8G∆9		14.6838	13.8878	15.3033	20.8786	16.1884	1.59192	0.0116619
hc K10D		17.5073	20.8078	22.3728	18.6036	19.8229	1.09373	0.000633626
		weak el. uORF1 GCN4-lacZ Expression
						Average	Std Error	P-value
hc WT		149.023	74.1443	143.63	109.177	118.994	17.3808
hc G∆8G∆9		334.801	331.933	324.373	320.702	327.952	3.2714	0.000932898
hc K10D		448.502	467.857	420.473	351.49	422.08	25.491	0.000133948
		poor el. uORF1 GCN4-lacZ Expression
						Average	Std Error	P-value
hc WT		475.539	466.663	328.311	580.517	462.757	51.7991
hc G∆8G∆9		653.987	715.277	619.655	594.348	645.817	26.2114	0.0296483
hc K10D		592.328	677.556	673.529	817.128	690.135	46.7167	0.0174332
		No el. uORF1 GCN4-lacZ Expression
						Average	Std Error	P-value
hc WT		1033.23	898.451	852.996	1234.04	1004.68	85.5959
hc G∆8G∆9		924.825	800.466	966.854		897.382	50.1027	0.332095
hc K10D		1034.68	1042.58	991.72		1022.99	15.8494	0.845863
