# Supplementary material for: eIF1A residues implicated in cancer stabilize translation preinitiation complexes and favor suboptimal initiation sites in yeast
Source: eLife journal article supplement (doi:10.7554/elife.31250), 2017-12-05
Supplement: supp [file elife-31250-supp-v1.zip › elife_poa_e31250_Figure_5_figure_supplement_1.pdf]

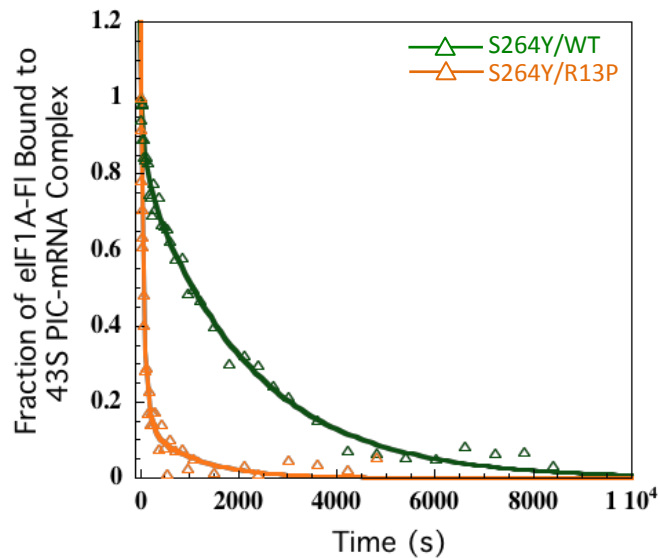

| eIF2 $\beta$ /eIF1A variants | mRNA | $k_1$<br>( $\times 10^{-3} \text{s}^{-1}$ ) | $k_2$<br>( $\times 10^{-3} \text{s}^{-1}$ ) | $\alpha_1$      | $\alpha_2$      | $K_{amp} (\alpha_2/\alpha_1)$ | $R_b$            |
|------------------------------|------|---------------------------------------------|---------------------------------------------|-----------------|-----------------|-------------------------------|------------------|
| WT/WT                        | AUG  | $12 \pm 2.0$                                | $0.4 \pm 0.06$                              | $0.13 \pm 0.01$ | $0.87 \pm 0.01$ | $6.7 \pm 0.6$                 | $0.20 \pm 0.002$ |
| WT/WT                        | UUG  | $17.5 \pm 1.5$                              | $0.8 \pm 0.09$                              | $0.19 \pm 0.02$ | $0.81 \pm 0.02$ | $4.4 \pm 0.7$                 | $0.18 \pm 0.002$ |
| S264Y/ WT                    | UUG  | $5.2 \pm 1.1$                               | $0.4 \pm 0.05$                              | $0.13 \pm 0.01$ | $0.88 \pm 0.02$ | $7.0 \pm 0.9$                 | $0.18 \pm 0.002$ |
| S264Y/ R13P                  | UUG  | $15.2 \pm 1.4$                              | $0.75 \pm 0.05$                             | $0.84 \pm 0.03$ | $0.16 \pm 0.03$ | $0.19 \pm 0.04$               | $0.17 \pm 0.002$ |

Figure 5-figure supplement 1
