# Supplementary material for: eIF1A residues implicated in cancer stabilize translation preinitiation complexes and favor suboptimal initiation sites in yeast
Source: eLife journal article supplement (doi:10.7554/elife.31250), 2017-12-05
Supplement: supp [file elife-31250-supp-v1.zip › elife_poa_e31250_Figure_5_source_data_1.xlsx]

## Sheet: Sheet1
Figure 5A
					UUG mRNA
Koff measurement		1	2	3	4	5	6	7	8	9	10	Average	Std Dev	Std Error	P value
	WT	0.162	0.108	0.114	0.348	0.174	0.144	0.174	0.204	0.198	0.192	0.1818	0.0670552	0.0223517
	R13P	0.684	0.45	0.876	0.876	1.296	2.298					1.08	0.658351	0.294423	0.0006
	K16D	0.756	0.582	0.42	0.522							0.57	0.140883	0.0813388	<0.0001
End-Point
	WT	0.51089	0.50974	0.3439	0.57195	0.67644	0.58549	0.5749	0.57208	0.53353	0.35191	0.523083	0.103671	0.034557
	R13P	0.14991	0.22832	0.12846	0.41561	0.29796	0.2096					0.23831	0.10564	0.0472436	0.000115629
	K16D	0.26135	0.29041	0.38879	0.24316							0.295928	0.0648945	0.0374669	0.0016933
Figure 5D
				k1 (x10-3)s-1					k2 (x10-3)s-1					a1					a2					Kamp (a2/a1)					Rbound
			Measurement		Average	Aver. Dev		Measurement		Average	Aver. Dev		Measurement		Average	Aver. Dev		Measurement		Average	Aver. Dev		Measurement		Average	Aver. Dev		Measurement		Average	Aver. Dev
eIF1 variant		mRNA	1	2				1	2				1	2				1	2				1	2				1	2
	WT	AUG	10	14	12	2		0.5	0.38	0.44	0.06		0.12	0.14	0.13	0.01		0.88	0.86	0.87	0.01		7.33	6.14	6.735	0.595		0.206	0.2023	0.20415	0.00185
	WT	UUG	19	16	17.5	1.5		0.85	0.68	0.765	0.085		0.165	0.213	0.189	0.024		0.835	0.787	0.811	0.024		5.06	3.7	4.38	0.68		0.18	0.184	0.182	0.002
	R13P	AUG	7.6	7	7.3	0.3		na	na	na	na		0.93	1	0.965	0.035		na	na	na	na		na	na	na	na		0.178	0.18	0.179	0.001
	R13P	UUG	23	22.4	22.7	0.3		na	na	na	na		0.96	1.02	0.99	0.03		na	na	na	na		na	na	na	na		0.163	0.161	0.162	0.001
	WTa	AUG	20.2	14	17.1	3.1		0.38	0.5	0.44	0.06		0.11	0.08	0.095	0.015		0.89	0.92	0.905	0.015		8.09	11.5	9.795	1.705		0.235	0.24	0.2375	0.0025
	WTa	UUG	18	10	14	4		0.7	0.88	0.79	0.09		0.15	0.23	0.19	0.04		0.85	0.77	0.81	0.04		5.7	3.34	4.52	1.18		0.212	0.208	0.21	0.002
	K16Da	AUG	4.2	7.4	5.8	1.6		na	na	na	na		0.935	0.987	0.961	0.026		na	na	na	na		na	na	na	na		0.234	0.23	0.232	0.002
	K16Da	UUG	14.8	17.5	16.15	1.35		na	na	na	na		0.976	0.9307	0.95335	0.02265		na	na	na	na		na	na	na	na		0.209	0.201	0.205	0.004
Figure 5-supplement figure 1
				k1 (x10-3)s-1					k2 (x10-3)s-1					a1					a2					Kamp (a2/a1)					Rbound
			Measurement		Average	Aver. Dev		Measurement		Average	Aver. Dev		Measurement		Average	Aver. Dev		Measurement		Average	Aver. Dev		Measurement		Average	Aver. Dev		Measurement		Average	Aver. Dev
eIF1 variant		mRNA	1	2				1	2				1	2				1	2				1	2				1	2
WT/WT		AUG	10	14	12	2		0.5	0.38	0.44	0.06		0.12	0.14	0.13	0.01		0.88	0.86	0.87	0.01		7.33	6.14	6.735	0.595		0.206	0.2023	0.20415	0.00185
WT /WT		UUG	19	16	17.5	1.5		0.85	0.68	0.765	0.085		0.165	0.213	0.189	0.024		0.835	0.787	0.811	0.024		5.06	3.7	4.38	0.68		0.18	0.184	0.182	0.002
S264Y/WT		UUG	6.2	4.1	5.15	1.05		0.3	0.4	0.35	0.05		0.14	0.112	0.126	0.014		0.86	0.89	0.875	0.015		6.14	7.928	7.034	0.894		0.184	0.181	0.1825	0.0015
S264Y/R13P		UUG	16.6	13.8	15.2	1.4		0.7	0.79	0.745	0.045		0.81	0.87	0.84	0.03		0.19	0.13	0.16	0.03		0.23	0.15	0.19	0.04		0.169	0.172	0.1705	0.0015
