# Supplementary material for: eIF1A residues implicated in cancer stabilize translation preinitiation complexes and favor suboptimal initiation sites in yeast
Source: eLife journal article supplement (doi:10.7554/elife.31250), 2017-12-05
Supplement: supp [file elife-31250-supp-v1.zip › elife_poa_e31250_Supplementary_File_2.xlsx]

## Sheet: CDS_all_Expr
YORF	Gene	RPF_WT	RPF_R13P	mRNA_WT	mRNA_R13P	ΔRPF_R13P	ΔmRNA_R13P	ΔTE_R13P
YAR050W	FLO1	4.4	7.8	7.6	8.3	3.35988	0.669598	2.69028
YAL063C	FLO9	4.4	7.4	6.9	7.8	3.00048	0.88974	2.11074
YHR211W	FLO5	3.5	5.4	8.4	8.4	1.87567	-0.022333	1.898
YPL113C		5.2	4.9	5.5	3.4	-0.245353	-2.12544	1.88009
YGR050C		4.4	5.9	5.8	5.8	1.51601	-0.047469	1.56348
YLR307W	CDA1	5.3	4.8	5.6	3.6	-0.503572	-2.01026	1.50668
YCR007C		3.6	4.5	5.4	5	0.926101	-0.37811	1.30421
YPR061C	JID1	4.9	4.7	6.1	4.7	-0.150787	-1.39703	1.24625
YKL222C		3.7	5	7.2	7.3	1.34529	0.12029	1.225
YLR227C	ADY4	2.5	3.8	5.7	5.8	1.28499	0.101079	1.18391
YKL132C	RMA1	2.9	3.6	6.5	6.1	0.709839	-0.460921	1.17076
YJL205C	NCE101	5.7	6.5	5.6	5.3	0.796592	-0.339678	1.13627
YLR394W	CST9	2.6	3.7	7.5	7.5	1.07378	-0.051192	1.12497
YNL138W-A	YSF3	6.2	6.9	6	5.6	0.733863	-0.389267	1.12313
YOR305W	RRG7	4.9	5.7	7.2	7	0.811181	-0.299516	1.1107
YDL169C	UGX2	4.1	4.4	5.2	4.5	0.286514	-0.765252	1.05177
YGR067C		3.8	4.9	5.1	5.2	1.12355	0.073149	1.0504
YER170W	ADK2	6.8	7.5	6.1	5.7	0.679479	-0.369502	1.04898
YNL254C	RTC4	5.5	6	7.2	6.7	0.483068	-0.527007	1.01008
YPL149W	ATG5	5.1	5.9	6.6	6.4	0.810082	-0.184981	0.99506
YGL061C	DUO1	6.7	6.9	6.4	5.5	0.151589	-0.838952	0.99054
YDL231C	BRE4	3.8	4.7	8.8	8.7	0.932843	-0.05692	0.98976
YPL147W	PXA1	4.5	4.7	6.4	5.7	0.264697	-0.689765	0.95446
YPL018W	CTF19	5.4	5.6	6.2	5.5	0.248206	-0.70214	0.95035
YNL230C	ELA1	4.9	5.5	6.7	6.4	0.641226	-0.295092	0.93632
YFR001W	LOC1	7.7	8.1	7.4	6.8	0.399771	-0.535099	0.93487
YBR240C	THI2	4.9	5.3	6.2	5.5	0.308248	-0.625404	0.93365
YLR313C	SPH1	4.6	5.5	6.7	6.6	0.877623	-0.055989	0.93361
YBL074C	AAR2	6	6.1	6.9	6.2	0.15259	-0.778995	0.93159
YCR003W	MRPL32	7.6	7.9	6.7	6.2	0.379684	-0.546255	0.92594
YNR032C-A	HUB1	6.3	6.7	6.1	5.5	0.353205	-0.555066	0.90827
YMR132C	JLP2	5.5	5.6	5.9	5.1	0.074741	-0.829018	0.90376
YKR097W	PCK1	3.6	4	5.4	4.8	0.316479	-0.584769	0.90125
YLR376C	PSY3	4.2	4.4	5.9	5.2	0.117623	-0.761489	0.87911
YOR193W	PEX27	4.8	5.5	6.9	6.7	0.722688	-0.152361	0.87505
YBR152W	SPP381	4.8	5.6	5.7	5.5	0.743489	-0.130215	0.8737
YML043C	RRN11	4.6	5.5	6.8	6.8	0.861103	-0.008147	0.86925
YMR064W	AEP1	5.9	6.4	7.8	7.5	0.496211	-0.362028	0.85824
YGR105W	VMA21	8.1	8.8	7.4	7.1	0.641278	-0.216878	0.85816
YOR148C	SPP2	4.9	5.6	6.4	6.3	0.782787	-0.074658	0.85745
YNR024W	MPP6	6.7	6.9	5.9	5.2	0.212056	-0.643699	0.85575
YGL257C	MNT2	6.9	7.3	9	8.6	0.463267	-0.390869	0.85414
YER058W	PET117	5.5	5.8	5.2	4.7	0.271067	-0.571051	0.84212
YHR145C		3.1	3.5	10.5	10.1	0.443579	-0.3844	0.82798
YIL161W		6.1	6.3	6.6	6	0.199882	-0.61436	0.81424
YMR019W	STB4	6.7	7	8.6	8.1	0.352122	-0.457446	0.80957
YIR014W		5.1	5.5	5.7	5.3	0.410574	-0.396498	0.80707
YNL047C	SLM2	6.4	6.9	7.8	7.5	0.541624	-0.26508	0.8067
YKL109W	HAP4	9.1	9.8	9.7	9.6	0.692235	-0.112395	0.80463
YHR059W	FYV4	6.8	7.1	6.2	5.7	0.347953	-0.452477	0.80043
YFL054C		5.8	6.5	7.6	7.6	0.730976	-0.065614	0.79659
YGR212W	SLI1	5.1	4.9	6.4	5.3	-0.231625	-1.0265	0.79488
YDR173C	ARG82	6.5	7.1	7	6.8	0.607217	-0.169179	0.7764
YNL211C		3.8	4.8	5	5.2	0.929915	0.154587	0.77533
YBR043C	QDR3	7.1	8.4	9	9.5	1.26957	0.496916	0.77266
YCR020W-B	HTL1	6.1	6.5	5.7	5.3	0.371249	-0.40006	0.77131
YPL046C	ELC1	6	6.4	5.3	4.9	0.37747	-0.385214	0.76268
YJL046W	AIM22	5.7	6	7.3	6.8	0.290049	-0.472022	0.76207
YDR540C	IRC4	5	5.1	5.3	4.7	0.094082	-0.667086	0.76117
YGR057C	LST7	4.9	6	6.4	6.7	1.10222	0.341663	0.76056
YGL180W	ATG1	6.9	7	8.4	7.7	0.090601	-0.660253	0.75085
YGR257C	MTM1	6.1	6.7	8.1	8	0.626773	-0.123651	0.75042
YML068W	ITT1	5	5.7	6.9	6.8	0.675786	-0.073355	0.74914
YDR473C	PRP3	6.4	6.8	6.6	6.3	0.421327	-0.321425	0.74275
YDR362C	TFC6	6.9	7.1	7.7	7.2	0.228396	-0.508248	0.73664
YOR162C	YRR1	5.9	6.5	7.6	7.5	0.609175	-0.122171	0.73135
YCR089W	FIG2	3.8	3.8	8.7	8	-0.011468	-0.739319	0.72785
YLR423C	ATG17	6.2	6.3	6.7	6.1	0.146646	-0.58052	0.72717
YPL060W	MFM1	5.3	6.2	6.3	6.4	0.834209	0.109989	0.72422
YKL048C	ELM1	5.5	6	7.3	7	0.479536	-0.242492	0.72203
YDR082W	STN1	3.6	4.7	6.9	7.2	1.02405	0.303285	0.72076
YLR147C	SMD3	6.9	7.4	6.3	6.1	0.535062	-0.185541	0.7206
YOL071W	EMI5	7.5	7.9	7	6.7	0.41923	-0.296874	0.7161
YGL071W	AFT1	7.2	7.8	8.7	8.6	0.605829	-0.109459	0.71529
YLR360W	VPS38	6.3	6.6	7.6	7.2	0.366616	-0.347249	0.71387
YGR043C	NQM1	7.2	7.7	7	6.8	0.489384	-0.224435	0.71382
YPL153C	RAD53	6.6	7.1	7.5	7.3	0.453205	-0.258772	0.71198
YDR383C	NKP1	5.6	6.3	6	6	0.720146	0.012589	0.70756
YPR071W		5.1	5.2	6.2	5.6	0.064203	-0.642387	0.70659
YDR045C	RPC11	7.6	8	7.5	7.2	0.380274	-0.318842	0.69912
YOR284W	HUA2	5.7	6.6	6	6.2	0.889092	0.190304	0.69879
YDR065W	RRG1	5	5.4	6.1	5.8	0.358054	-0.338371	0.69642
YPL072W	UBP16	5.2	5.6	6.7	6.4	0.441298	-0.248443	0.68974
YDL222C	FMP45	5.1	5.9	5.8	5.9	0.811144	0.122856	0.68829
YDL199C		6.1	6	6.7	6	-0.052804	-0.740061	0.68726
YBR284W		4.3	4.5	6.2	5.7	0.245872	-0.441322	0.68719
YLR267W	BOP2	5.2	3.4	6.1	3.6	-1.81818	-2.50022	0.68204
YGR153W		5.7	5.7	5.9	5.2	-0.01001	-0.684766	0.67476
YBL031W	SHE1	5.5	5.9	6.3	6	0.385969	-0.286487	0.67246
YPR094W	RDS3	6.7	7.3	6.2	6.2	0.586767	-0.079565	0.66633
YMR127C	SAS2	5.3	5.8	6.7	6.5	0.479959	-0.185849	0.66581
YHR184W	SSP1	5.6	6.1	5.6	5.5	0.521893	-0.143456	0.66535
YPR107C	YTH1	7.1	7.6	6.4	6.2	0.493701	-0.171441	0.66514
YLR215C	CDC123	7.1	7.4	7.2	6.8	0.282206	-0.381065	0.66327
YDR478W	SNM1	6	6	5.9	5.2	0.004859	-0.656078	0.66094
YGL250W	RMR1	6.1	6.6	5.7	5.6	0.500476	-0.160335	0.66081
YEL003W	GIM4	7.6	7.9	7.3	6.9	0.28038	-0.379765	0.66015
YJL139C	YUR1	6.3	6.4	7.3	6.8	0.124229	-0.535823	0.66005
YPL064C	CWC27	5.6	6.1	7.1	7	0.544662	-0.115061	0.65972
YCL026C-B	HBN1	8.2	8.1	6.8	6.1	-0.052049	-0.710536	0.65849
YIL009C-A	EST3	6.5	6.7	7.1	6.7	0.178674	-0.476748	0.65542
YOL105C	WSC3	5.5	5.8	7.8	7.4	0.276537	-0.377786	0.65432
YLR052W	IES3	7.4	7.9	7.6	7.6	0.584346	-0.069041	0.65339
YER053C-A		7.6	8.1	6.7	6.6	0.566497	-0.085951	0.65245
YOR287C	RRP36	7.4	7.6	6.4	5.9	0.136313	-0.514956	0.65127
YGL136C	MRM2	4.7	5.2	6.3	6.2	0.552604	-0.095593	0.6482
YIL008W	URM1	8.1	8.4	7.3	7	0.318675	-0.329374	0.64805
YLR211C		5.3	5.8	5.9	5.8	0.588105	-0.059759	0.64786
YNL063W	MTQ1	5.1	5.7	6.7	6.8	0.689361	0.043818	0.64554
YNL129W	NRK1	7.4	7.8	7.4	7.1	0.349983	-0.288072	0.63805
YFL031W	HAC1	8.1	8.8	12.5	12.5	0.66257	0.025117	0.63745
YOL069W	NUF2	7	7.2	8	7.6	0.202192	-0.432116	0.63431
YDR472W	TRS31	7.6	7.8	7.6	7.3	0.246566	-0.379076	0.62564
YJL127C-B		5	5.7	6.5	6.6	0.690277	0.065979	0.6243
YKL005C	BYE1	7.2	7.5	8.2	8	0.353662	-0.270434	0.6241
YMR180C	CTL1	5.6	6	7.4	7.3	0.452312	-0.169376	0.62169
YGL041W-A		7.2	7.4	6.9	6.5	0.220803	-0.40018	0.62098
YGL122C	NAB2	10.8	11.1	10	9.7	0.334772	-0.283928	0.6187
YOL117W	RRI2	6	6.3	7.4	7.1	0.308438	-0.309637	0.61807
YOR011W	AUS1	5.4	5	8.2	7.1	-0.430454	-1.04799	0.61754
YBL033C	RIB1	8.7	9	8.2	7.9	0.289951	-0.324551	0.6145
YJL103C	GSM1	4.9	5.6	6.8	7	0.761013	0.146559	0.61445
YOR363C	PIP2	6.7	7.1	8.6	8.4	0.367887	-0.246134	0.61402
YMR258C		7.1	7.4	8.3	8.1	0.33622	-0.271386	0.60761
YDL184C	RPL41A	12.7	13.1	11.5	11.3	0.410979	-0.194117	0.6051
YLR142W	PUT1	5.9	5.3	5.9	4.8	-0.545313	-1.1501	0.60478
YPL052W	OAZ1	6.5	6.5	6.9	6.3	0.011277	-0.591926	0.6032
YGL254W	FZF1	6	6.8	6.4	6.6	0.821941	0.21888	0.60306
YNR034W-A		8.9	9.1	7.4	7	0.183825	-0.418948	0.60277
YDR387C		5.7	6.5	7.8	8	0.791217	0.191273	0.59994
YMR059W	SEN15	6	6.4	5.5	5.2	0.382966	-0.215856	0.59882
YJL058C	BIT61	6.1	6.1	6.8	6.2	-0.034935	-0.631916	0.59698
YMR052W	FAR3	5.7	6.1	5.3	5	0.365924	-0.230239	0.59616
YJL118W		5	5.3	6.6	6.3	0.342635	-0.249503	0.59214
YNL275W	BOR1	5.6	5.9	6.5	6.2	0.283237	-0.3069	0.59014
YFL034C-B	MOB2	8.2	8.2	7.5	7	0.067379	-0.521926	0.5893
YIL152W		5.3	5.2	6.8	6.2	-0.040483	-0.628687	0.5882
YDR242W	AMD2	4.3	4.7	7.1	7	0.422881	-0.163144	0.58602
YOR044W	IRC23	5.5	5.5	6.3	5.8	0.05467	-0.53093	0.5856
YER007W	PAC2	5.1	5.6	6.2	6	0.457545	-0.125643	0.58319
YDR147W	EKI1	6.9	7	7.8	7.3	0.097345	-0.48434	0.58169
YIL003W	CFD1	6.6	6.9	7	6.8	0.360184	-0.221503	0.58169
YER159C	BUR6	8	8.8	7.7	7.9	0.799336	0.223085	0.57625
YMR097C	MTG1	6.4	6.9	7.2	7.1	0.476614	-0.099499	0.57611
YLR373C	VID22	7.8	7.9	8.8	8.4	0.114276	-0.461811	0.57609
YNL157W	IGO1	8	8.6	7.8	7.8	0.634601	0.062479	0.57212
YMR156C	TPP1	5.7	6	5.8	5.5	0.292728	-0.279143	0.57187
YMR111C		6.2	6.5	6.5	6.3	0.363934	-0.20711	0.57104
YKL011C	CCE1	5.9	6.3	6.3	6.1	0.356458	-0.214248	0.57071
YDR282C		5.9	6	6.3	5.9	0.092967	-0.475991	0.56896
YPL022W	RAD1	7	7.5	9.2	9.1	0.494468	-0.072631	0.5671
YOL036W		8.1	8.4	9.5	9.2	0.286164	-0.27794	0.5641
YNL249C	MPA43	5.3	5.4	6.6	6.2	0.150875	-0.410895	0.56177
YDR357C	CNL1	6.9	7.4	8.1	8.1	0.49922	-0.061359	0.56058
YBR111W-A	SUS1	7.1	7.4	6.7	6.4	0.235431	-0.325025	0.56046
YPL068C		6	6.3	6.5	6.3	0.31141	-0.245686	0.5571
YKL170W	MRPL38	6.8	7.1	6.4	6.1	0.279271	-0.276411	0.55568
YGR206W	MVB12	6.4	6.6	5.7	5.3	0.160939	-0.39277	0.55371
YEL020W-A	TIM9	9.7	9.9	8.5	8.2	0.225055	-0.32823	0.55329
YDL010W	GRX6	7.7	7.8	7.3	6.9	0.101252	-0.450226	0.55148
YOR045W	TOM6	8.9	9.4	8	7.9	0.446943	-0.103507	0.55045
YJR147W	HMS2	4.5	4.4	7.6	6.9	-0.166524	-0.715601	0.54908
YOR094W	ARF3	7.3	7.4	6.3	5.9	0.117228	-0.431616	0.54884
YPL104W	MSD1	6.8	7.1	7.8	7.5	0.279792	-0.26885	0.54864
YAL062W	GDH3	5.7	5.6	6.1	5.6	-0.026933	-0.574644	0.54771
YBR012C		3.6	3.1	5.5	4.4	-0.53141	-1.07831	0.5469
YKL122C	SRP21	8.4	8.6	7.8	7.5	0.190356	-0.354775	0.54513
YDR247W	VHS1	6.2	6.7	7	6.9	0.475583	-0.068996	0.54458
YJL148W	RPA34	9.1	9.5	8.5	8.3	0.35159	-0.192604	0.54419
YOR288C	MPD1	7.9	7.9	7.7	7	-0.080113	-0.622093	0.54198
YDL138W	RGT2	5.1	5.4	8.2	7.9	0.262577	-0.275803	0.53838
YCR023C		6.6	7.3	8.2	8.3	0.648422	0.11035	0.53807
YGR251W		6.8	7.3	6.1	6	0.451305	-0.08484	0.53615
YMR134W		6.9	6.7	6.7	6	-0.175243	-0.709507	0.53426
YJL146W	IDS2	7.4	7.7	7.5	7.3	0.31292	-0.220112	0.53303
YMR176W	ECM5	6.8	7.1	9.3	9.1	0.285709	-0.240637	0.52635
YDL065C	PEX19	8.3	8.6	7.4	7.2	0.304878	-0.221279	0.52616
YPL008W	CHL1	5.9	6.5	7.8	7.9	0.601415	0.075718	0.5257
YBR217W	ATG12	4.3	5.2	5.5	5.8	0.829021	0.30344	0.52558
YKL052C	ASK1	7.4	7.9	7.5	7.4	0.435741	-0.089266	0.52501
YKL064W	MNR2	8.2	8.7	9.5	9.5	0.519351	-0.005079	0.52443
YBL054W	TOD6	7.7	8	7.9	7.7	0.272338	-0.251997	0.52434
YOR006C	TSR3	7.7	8	7.4	7.2	0.368591	-0.153978	0.52257
YOR266W	PNT1	6	6.5	6.7	6.7	0.477288	-0.045277	0.52257
YGR075C	PRP38	6	6.2	5.7	5.4	0.225864	-0.296054	0.52192
YKL098W	MTC2	5.8	6	7.5	7.3	0.23608	-0.284249	0.52033
YDL211C		5	5	6	5.5	0.030981	-0.488911	0.51989
YKR068C	BET3	8.3	8.7	8.1	8	0.432007	-0.087873	0.51988
YDR322W	MRPL35	8.2	8.6	7.7	7.5	0.305486	-0.213447	0.51893
YMR035W	IMP2	6.1	6.1	6.1	5.6	0.003605	-0.514787	0.51839
YBL078C	ATG8	7.3	8	6	6.2	0.669921	0.152585	0.51734
YMR171C	EAR1	7	7.4	8.4	8.3	0.36398	-0.152753	0.51673
YML079W		8.9	9.4	8.5	8.4	0.465978	-0.050063	0.51604
YNR034W	SOL1	8.2	8.4	7.6	7.3	0.208123	-0.306159	0.51428
YDL085C-A		7.3	7.6	6.7	6.6	0.333215	-0.180274	0.51349
YBR114W	RAD16	6.9	7.4	8.1	8	0.450357	-0.062813	0.51317
YHR171W	ATG7	6.4	6.6	6.9	6.6	0.155119	-0.35742	0.51254
YDL069C	CBS1	5.3	5.6	5.6	5.4	0.311458	-0.20088	0.51234
YML042W	CAT2	5.2	5.7	6.7	6.7	0.475837	-0.035372	0.51121
YLL027W	ISA1	8.8	9.3	8.4	8.4	0.524094	0.0139	0.51019
YLR453C	RIF2	4.6	4.6	5.8	5.4	0.084576	-0.423729	0.5083
YNL294C	RIM21	6.7	7.4	9	9.2	0.658458	0.150237	0.50822
YNL051W	COG5	7	7.5	7.4	7.3	0.444429	-0.063026	0.50746
YMR269W	TMA23	5.8	6	5.1	4.7	0.192208	-0.314937	0.50714
YBR239C	ERT1	6.3	6.3	7.5	7	0.048459	-0.457777	0.50624
YBR089C-A	NHP6B	9	9.4	8	7.9	0.394447	-0.11121	0.50566
YMR034C		4.3	3.9	5.8	4.9	-0.413032	-0.916469	0.50344
YGR001C		8.9	9.3	8.7	8.6	0.425431	-0.074389	0.49982
YKL190W	CNB1	8.8	9.4	8.5	8.6	0.562205	0.063267	0.49894
YDL133C-A	RPL41B	12.6	13.1	11.6	11.6	0.471852	-0.02375	0.4956
YLR177W		8	8.2	8.7	8.4	0.190796	-0.303575	0.49437
YBR141C		6.3	6.5	6.3	6	0.162391	-0.331461	0.49385
YDR379C-A		6	6.1	6.6	6.2	0.054222	-0.438162	0.49238
YJR066W	TOR1	8.9	9.1	10.8	10.5	0.157312	-0.334349	0.49166
YDL139C	SCM3	5.4	5.7	5.7	5.5	0.293079	-0.197063	0.49014
YNR007C	ATG3	6.9	7.2	6.7	6.4	0.265093	-0.224353	0.48945
YJL206C		5.5	5.7	7.1	6.8	0.221535	-0.267158	0.48869
YBL060W	YEL1	6.4	6.7	7.5	7.3	0.308772	-0.179747	0.48852
YPR194C	OPT2	4.1	4.4	7.4	7.2	0.28768	-0.200319	0.488
YNL253W	TEX1	7.2	7.1	7.3	6.7	-0.076164	-0.563999	0.48784
YCR083W	TRX3	8.1	8.3	7.9	7.6	0.227257	-0.259905	0.48716
YGL211W	NCS6	7	7.2	8.2	7.9	0.221741	-0.26437	0.48611
YPR117W		5.8	6.2	10.2	10.1	0.386872	-0.09921	0.48608
YPL227C	ALG5	7.6	7.8	8.1	7.8	0.17637	-0.309553	0.48592
YNL075W	IMP4	8.4	8.8	8	7.9	0.463347	-0.02125	0.4846
YKR022C	NTR2	5.1	6.3	6.7	7.4	1.1654	0.682607	0.4828
YKL174C	TPO5	7.6	7.5	8.2	7.6	-0.078952	-0.560455	0.4815
YPL140C	MKK2	6.7	6.9	7.5	7.2	0.141603	-0.338839	0.48044
YGR215W	RSM27	7.4	8	6.8	6.9	0.571149	0.091333	0.47982
YLR418C	CDC73	8.9	8.9	8.3	7.8	-0.007523	-0.48573	0.47821
YIL031W	ULP2	6.4	6.5	8.9	8.5	0.076468	-0.401393	0.47786
YBL018C	POP8	6.3	6.7	6.9	6.8	0.394668	-0.081294	0.47596
YKL135C	APL2	8.8	9	9.4	9.1	0.18339	-0.292076	0.47547
YCR086W	CSM1	7.4	7.5	6.6	6.3	0.161784	-0.313051	0.47484
YGL128C	CWC23	6.1	6.4	6.3	6.1	0.326399	-0.146577	0.47298
YJL133W	MRS3	6.4	6.8	7.2	7.2	0.441075	-0.031897	0.47297
YOL112W	MSB4	6.9	8.2	8.6	9.3	1.25392	0.781561	0.47236
YPL077C		5.6	6.1	5.7	5.7	0.494541	0.022613	0.47193
YDL028C	MPS1	7.3	7.4	8.4	8	0.066005	-0.40534	0.47134
YGL075C	MPS2	5.4	5.4	6.3	5.8	-0.059318	-0.530648	0.47133
YER132C	PMD1	7.3	7.4	9.7	9.4	0.138085	-0.332835	0.47092
YGL129C	RSM23	8	8.3	8	7.8	0.259744	-0.209887	0.46963
YKL133C		4.6	4.8	7	6.8	0.254416	-0.215072	0.46949
YJL179W	PFD1	7.5	7.9	6.8	6.7	0.348455	-0.120704	0.46916
YHR195W	NVJ1	7.4	7.3	7.9	7.4	-0.049733	-0.517948	0.46822
YMR067C	UBX4	8.6	8.8	8.5	8.2	0.16665	-0.300759	0.46741
YIL002C	INP51	6.9	7.2	8.7	8.5	0.290549	-0.175842	0.46639
YML098W	TAF13	7.2	7.3	7.1	6.8	0.142328	-0.324025	0.46635
YGL226W	MTC3	6.3	6.8	6	6	0.458957	-0.005607	0.46456
YDR406W	PDR15	6.7	7.1	9.2	9.1	0.341718	-0.122472	0.46419
YML096W		6.9	7.1	7.8	7.6	0.243221	-0.220632	0.46385
YKL144C	RPC25	7.5	7.8	7.2	7	0.294152	-0.168222	0.46237
YPL133C	RDS2	6.1	6.8	7.2	7.3	0.63512	0.173047	0.46207
YDR168W	CDC37	10.3	10.5	9.4	9.2	0.241312	-0.219801	0.46111
YER074W-A	YOS1	8.1	8.6	7.5	7.5	0.463168	0.002626	0.46054
YBR260C	RGD1	8.4	8.5	8.4	8.1	0.147842	-0.312318	0.46016
YBR062C		7.7	7.9	6.9	6.7	0.263946	-0.196176	0.46012
YDR076W	RAD55	4.8	5	6.1	5.9	0.187137	-0.27251	0.45965
YNL056W	OCA2	7	7.4	7.9	7.8	0.423938	-0.035372	0.45931
YER015W	FAA2	5.5	6.2	6.7	7	0.771068	0.31259	0.45848
YDL183C		5.3	5.4	6.2	5.9	0.097582	-0.360834	0.45842
YLR127C	APC2	6.2	6.4	7.6	7.4	0.242273	-0.215367	0.45764
YHR129C	ARP1	5.4	5.9	6.8	6.8	0.469928	0.012563	0.45736
YMR285C	NGL2	7.5	7.8	7.7	7.5	0.309143	-0.147854	0.457
YBR297W	MAL33	5.9	6.2	6.7	6.6	0.314429	-0.142372	0.4568
YOL141W	PPM2	6.5	6.3	7.1	6.4	-0.175996	-0.632336	0.45634
YPL146C	NOP53	8.3	8.5	8	7.7	0.168926	-0.286219	0.45515
YDL219W	DTD1	8	8.3	7.7	7.6	0.297429	-0.157332	0.45476
YBR101C	FES1	9	9.4	8.5	8.4	0.345349	-0.107879	0.45323
YER087C-B	SBH1	9.5	9.8	8.8	8.7	0.332471	-0.120191	0.45266
YER098W	UBP9	6	6.6	7.4	7.6	0.591372	0.139971	0.4514
YJL209W	CBP1	5.6	5.8	7.6	7.4	0.199777	-0.251065	0.45084
YDR125C	ECM18	4.5	4.6	6.2	5.9	0.093421	-0.356621	0.45004
YPL017C	IRC15	5.2	5.6	6.4	6.4	0.453638	0.003916	0.44972
YPL167C	REV3	3.9	4.4	7.7	7.7	0.414115	-0.03488	0.44899
YDR408C	ADE8	9.5	10.3	9.4	9.7	0.783213	0.33455	0.44866
YJR054W		6.1	6.3	7.6	7.5	0.272357	-0.175833	0.44819
YHR114W	BZZ1	8.6	8.8	8.6	8.4	0.214921	-0.232721	0.44764
YGR058W	PEF1	7.4	7.5	6.7	6.3	0.133781	-0.313832	0.44761
YBR278W	DPB3	6.7	7	6.8	6.6	0.216914	-0.23016	0.44707
YML129C	COX14	8	8.5	7.5	7.5	0.448953	0.004819	0.44413
YNL199C	GCR2	7.7	7.8	8.2	7.9	0.174073	-0.268565	0.44264
YBL035C	POL12	7.9	8.2	8.2	8	0.291259	-0.150764	0.44202
YNL038W	GPI15	5.3	5.3	7.1	6.7	0.054294	-0.387344	0.44164
YGL153W	PEX14	8.1	8.2	7.5	7.2	0.134961	-0.306083	0.44104
YDR016C	DAD1	6.3	6.4	6.7	6.4	0.131573	-0.309388	0.44096
YFR041C	ERJ5	8.2	8.3	7.3	7	0.10448	-0.336343	0.44082
YLL011W	SOF1	8.4	8.5	8.4	8	0.044152	-0.395917	0.44007
YJR047C	ANB1	10.9	11.3	7.7	7.7	0.432215	-0.007422	0.43964
YML121W	GTR1	7.3	7.7	7.7	7.7	0.408735	-0.030845	0.43958
YDR337W	MRPS28	7.9	8.2	7.5	7.4	0.381182	-0.058249	0.43943
YKL093W	MBR1	6.3	7	6.2	6.5	0.733853	0.294491	0.43936
YDR066C	RTR2	5.5	5.4	5.7	5.1	-0.189903	-0.628934	0.43903
YEL018W	EAF5	6.5	6.8	6.9	6.8	0.303124	-0.135132	0.43826
YPR180W	AOS1	7.9	8.1	7.9	7.6	0.119714	-0.317781	0.4375
YLR435W	TSR2	8.6	8.9	7.6	7.5	0.272008	-0.164839	0.43685
YGR005C	TFG2	8.7	8.8	8.2	7.8	0.08828	-0.348542	0.43682
YNL090W	RHO2	7.6	7.7	7.9	7.7	0.156662	-0.279284	0.43595
YAL037W		3	3.3	5.3	5.2	0.262185	-0.173657	0.43584
YKL203C	TOR2	9.1	9.3	10.8	10.5	0.152251	-0.281824	0.43408
YLR393W	ATP10	7.2	7.2	7	6.6	-0.000798	-0.433092	0.43229
YGL208W	SIP2	7.6	7.8	7.4	7.2	0.174383	-0.257899	0.43228
YGL229C	SAP4	5.4	5.2	7.6	7	-0.169799	-0.602029	0.43223
YDL017W	CDC7	6.8	7.1	7	6.9	0.301045	-0.131075	0.43212
YLR262C-A	TMA7	10.6	11	9.2	9.2	0.391755	-0.040349	0.4321
YOR126C	IAH1	7.5	7.7	7.6	7.4	0.212128	-0.219387	0.43151
YGR029W	ERV1	7.9	8.4	7.6	7.6	0.459022	0.027848	0.43117
YDL159W	STE7	7.1	7.2	7.5	7.2	0.1054	-0.325353	0.43075
YDR541C		6	6.7	7	7.3	0.697776	0.267058	0.43072
YDR034C	LYS14	7.6	7.9	9.2	9	0.271395	-0.159156	0.43055
YOL159C		5.8	6.2	6.1	6	0.388912	-0.040865	0.42978
YMR123W	PKR1	8.7	8.8	8	7.6	0.048647	-0.380339	0.42899
YDL104C	QRI7	5.4	5.3	5.7	5.2	-0.09487	-0.523452	0.42858
YHR036W	BRL1	7	7.2	7.1	6.8	0.130178	-0.298311	0.42849
YHR002W	LEU5	5	5.4	6.3	6.3	0.456424	0.028222	0.4282
YKR037C	SPC34	6.8	7.3	6.3	6.4	0.478597	0.051037	0.42756
YOR179C	SYC1	6.8	7	6.8	6.5	0.171559	-0.255888	0.42745
YPR067W	ISA2	6.2	6.4	7	6.8	0.239491	-0.187707	0.4272
YNL215W	IES2	7.9	8.1	7.8	7.5	0.182074	-0.244979	0.42705
YGL029W	CGR1	6.5	6.9	5.2	5.2	0.334835	-0.091534	0.42637
YOR283W		8.6	8.7	8.1	7.8	0.12303	-0.301826	0.42486
YBR253W	SRB6	6	7.3	6	6.9	1.34944	0.924919	0.42452
YOL102C	TPT1	7.3	7.4	6.9	6.6	0.137522	-0.28629	0.42381
YIR021W	MRS1	6.7	7	7.4	7.3	0.372637	-0.050964	0.4236
YPL003W	ULA1	6.3	6.4	7.6	7.2	0.064312	-0.359177	0.42349
YEL038W	UTR4	8.8	9	8.3	8.1	0.227055	-0.196307	0.42336
YJR008W		7.7	7.9	7.6	7.4	0.276331	-0.145913	0.42224
YOL157C	IMA2	5.8	6	6.6	6.4	0.211112	-0.210961	0.42207
YPR115W	RGC1	7.9	8.2	9.7	9.6	0.311581	-0.11001	0.42159
YLL055W	YCT1	3.8	3.6	6.2	5.5	-0.248611	-0.66974	0.42113
YFL044C	OTU1	8	8.4	7.7	7.6	0.351138	-0.069338	0.42048
YPR084W		5.9	6.4	7	7.1	0.495584	0.075988	0.4196
YMR195W	ICY1	7.7	8.4	7	7.2	0.60234	0.183396	0.41894
YKL099C	UTP11	8.2	8.4	7.6	7.3	0.17912	-0.239475	0.41859
YGR202C	PCT1	8.1	8.2	8.2	7.9	0.194446	-0.222533	0.41698
YDR014W	RAD61	5.8	6.1	6.2	6.1	0.335745	-0.081218	0.41696
YDR320C-A	DAD4	7	7.1	7	6.7	0.066014	-0.350359	0.41637
YNL257C	SIP3	7.6	7.9	9.5	9.4	0.30491	-0.111405	0.41631
YDR175C	RSM24	8	8.3	7.3	7.3	0.360174	-0.054464	0.41464
YPL036W	PMA2	11.6	11.7	10.9	10.6	0.118095	-0.296124	0.41422
YDR069C	DOA4	7.2	7.6	8.5	8.4	0.33227	-0.08157	0.41384
YDR311W	TFB1	8.1	8.2	8.4	8.1	0.059744	-0.353952	0.4137
YDR110W	FOB1	7.1	7.3	7.9	7.7	0.206616	-0.206513	0.41313
YLR051C	FCF2	7.7	7.7	7.4	7.1	0.065201	-0.347726	0.41293
YCR073C	SSK22	6.9	6.9	8.8	8.4	-0.033213	-0.445979	0.41277
YJR010C-A	SPC1	7.6	7.9	6.9	6.7	0.236614	-0.175973	0.41259
YPL066W		6.5	6.8	8.5	8.4	0.305738	-0.105459	0.4112
YIL079C	AIR1	7	7.2	7.3	7.1	0.209575	-0.201256	0.41083
YOR386W	PHR1	7.1	7.2	7.5	7.3	0.156808	-0.252844	0.40965
YDL107W	MSS2	5.8	5.9	5.8	5.6	0.144663	-0.262696	0.40736
YLR091W	GEP5	5.4	5.7	5.9	5.8	0.316483	-0.090756	0.40724
YDR092W	UBC13	9.5	9.7	8.3	8.1	0.216387	-0.190805	0.40719
YDR514C		6.9	7.2	6.9	6.8	0.33128	-0.075494	0.40677
YMR244C-A		7.6	7.8	7	6.8	0.221991	-0.184509	0.4065
YIL128W	MET18	8.5	8.7	9.3	9.1	0.195485	-0.210657	0.40614
YPL166W	ATG29	6.1	6.4	5.8	5.7	0.343192	-0.062751	0.40594
YKL087C	CYT2	8.3	8.5	7.7	7.5	0.175844	-0.230083	0.40593
YJR111C		7.3	7.3	7.3	6.9	-0.019774	-0.425301	0.40553
YHR005C-A	TIM10	9.3	9.8	8.8	9	0.541835	0.137404	0.40443
YCL035C	GRX1	10.4	10.8	8.8	8.8	0.335387	-0.068328	0.40372
YJL044C	GYP6	7.7	7.9	8.8	8.6	0.20356	-0.19991	0.40347
YDR339C	FCF1	8.4	8.6	8	7.8	0.188559	-0.214198	0.40276
YLR126C		6.6	7.1	6.6	6.6	0.440808	0.038917	0.40189
YMR069W	NAT4	5	5	6	5.7	0.056811	-0.344706	0.40152
YDL001W	RMD1	7.2	7.2	7.9	7.5	0.019084	-0.382029	0.40111
YPL236C		5.8	5.8	6.8	6.4	0.049055	-0.351696	0.40075
YOR047C	STD1	7.2	7.2	7.7	7.3	0.005856	-0.394494	0.40035
YHR186C	KOG1	8.3	8.5	9.8	9.5	0.171995	-0.228265	0.40026
YBL034C	STU1	8.1	8	9	8.5	-0.06901	-0.469049	0.40004
YGR201C		5.1	5.3	5.9	5.7	0.192805	-0.20635	0.39916
YPL034W		3.5	3.4	6.1	5.6	-0.080323	-0.479306	0.39898
YOR358W	HAP5	6.3	6.8	6.5	6.7	0.544215	0.145878	0.39834
YPL024W	RMI1	6.7	7	7.7	7.5	0.267544	-0.13062	0.39816
YHR167W	THP2	6.9	6.7	6.1	5.5	-0.161692	-0.55964	0.39795
YOL018C	TLG2	7.4	7.7	7.1	6.9	0.26933	-0.128605	0.39794
YFR008W	FAR7	6.8	7.1	5.6	5.5	0.253647	-0.144175	0.39782
YMR106C	YKU80	6.5	6.5	7.4	7	-0.026463	-0.424269	0.39781
YOR178C	GAC1	6.6	7	7.8	7.8	0.403189	0.00553	0.39766
YLL009C	COX17	8.2	8.4	6.9	6.7	0.267702	-0.129333	0.39703
YNR059W	MNT4	4.7	5	6.9	6.8	0.316205	-0.079249	0.39545
YJR030C		6.9	7.2	7.9	7.8	0.327107	-0.067449	0.39456
YJR089W	BIR1	6.4	6.8	7.7	7.7	0.442433	0.048257	0.39418
YDL157C		8.8	9.1	7.9	7.8	0.304632	-0.088542	0.39317
YDR113C	PDS1	7.6	7.9	7	7	0.337633	-0.055279	0.39291
YIL153W	RRD1	7	7.5	7.7	7.7	0.460926	0.06868	0.39225
YLR014C	PPR1	5.8	6.2	7.6	7.6	0.410649	0.018697	0.39195
YML077W	BET5	6.9	6.9	6.9	6.5	-0.018345	-0.409915	0.39157
YDR513W	GRX2	9.8	10.1	9	8.9	0.34044	-0.050809	0.39125
YGL060W	YBP2	7.9	8	8.4	8.2	0.141386	-0.249551	0.39094
YDR332W	IRC3	4.9	5.2	7.3	7.2	0.342302	-0.048394	0.3907
YPR079W	MRL1	7.9	7.5	7.6	6.9	-0.34714	-0.73644	0.3893
YML054C	CYB2	4	3.9	5.8	5.4	-0.02782	-0.41696	0.38914
YER115C	SPR6	3.4	4.1	6.1	6.5	0.711589	0.323048	0.38854
YLR456W		4.7	5.1	5.6	5.7	0.425767	0.03816	0.38761
YGL086W	MAD1	7.9	8	8.2	7.9	0.130406	-0.256582	0.38699
YLL001W	DNM1	9.4	9.6	9.3	9.1	0.186177	-0.200455	0.38663
YOL135C	MED7	7	7.3	6.3	6.1	0.223321	-0.163211	0.38653
YLL061W	MMP1	4.5	4.5	6.1	5.8	0.064888	-0.321623	0.38651
YHR110W	ERP5	7.5	7.6	8.2	8	0.104241	-0.282141	0.38638
YBR173C	UMP1	9.8	10.1	8.5	8.4	0.338863	-0.046443	0.38531
YNL020C	ARK1	7.1	7.2	7.8	7.4	0.047005	-0.338274	0.38528
YIL014C-A		5.6	5.6	5.8	5.4	0.006058	-0.37869	0.38475
YNL186W	UBP10	9.1	9.4	9.6	9.5	0.321287	-0.063433	0.38472
YML027W	YOX1	8.7	8.6	8.2	7.7	-0.124432	-0.508955	0.38452
YER028C	MIG3	5	5.1	6.4	6.2	0.104658	-0.279645	0.3843
YPR109W		5.5	5.9	7	7	0.389811	0.00566	0.38415
YKR010C	TOF2	6.9	7.2	8	8	0.297069	-0.086576	0.38365
YDL056W	MBP1	7.6	7.6	8.4	8.1	0.060446	-0.323127	0.38357
YJL011C	RPC17	7.3	7.5	6.4	6.1	0.148484	-0.234874	0.38336
YIL073C	SPO22	5.2	5.4	6.4	6.2	0.194483	-0.188533	0.38302
YNL299W	TRF5	6.8	6.9	7.6	7.3	0.123028	-0.259528	0.38256
YIL095W	PRK1	7.3	7.3	8	7.6	0.009921	-0.372054	0.38198
YPR022C		8.1	8.1	9.1	8.7	0.043676	-0.33829	0.38197
YBL071W-A	KTI11	7.7	8.3	6.6	6.9	0.638555	0.257145	0.38141
YPL014W		8.2	8.4	8.1	7.8	0.159339	-0.221856	0.38119
YGR140W	CBF2	7.1	7.2	8.2	7.9	0.123449	-0.257357	0.38081
YER101C	AST2	7	7.4	6.2	6.2	0.371199	-0.009473	0.38067
YLR144C	ACF2	8.5	8.5	8.8	8.4	-0.035946	-0.416002	0.38006
YDL091C	UBX3	6.5	6.9	7.1	7.1	0.392829	0.012937	0.37989
YBL057C	PTH2	8	8.3	8	7.9	0.336642	-0.043144	0.37979
YDR421W	ARO80	6.7	6.9	8	7.8	0.220077	-0.159714	0.37979
YDR277C	MTH1	7.5	7.6	7.8	7.6	0.124654	-0.254665	0.37932
YFL034C-A	RPL22B	9.9	10.1	9	8.8	0.183341	-0.195378	0.37872
YLR146W-A		7.3	7.5	6.5	6.4	0.259941	-0.118702	0.37864
YPL196W	OXR1	6.8	7.2	6.9	6.9	0.3467	-0.03077	0.37747
YBL008W	HIR1	6.8	7	7.9	7.8	0.184771	-0.192435	0.37721
YNL014W	HEF3	8.5	8.8	7.5	7.4	0.31864	-0.057665	0.37631
YDR123C	INO2	6.7	6.5	7	6.5	-0.200412	-0.576571	0.37616
YLR154C	RNH203	7.8	7.9	7.2	6.9	0.096173	-0.279538	0.37571
YDR532C	KRE28	6	6.2	6.2	6.1	0.219219	-0.155932	0.37515
YOR327C	SNC2	9	9.4	8.2	8.3	0.417001	0.042377	0.37462
YFR042W	KEG1	6.7	6.9	6.8	6.7	0.201893	-0.172615	0.37451
YNL137C	NAM9	8.7	9	8.7	8.7	0.32495	-0.049141	0.37409
YNL270C	ALP1	6.4	5.7	6	5	-0.649345	-1.02331	0.37396
YPR187W	RPO26	9.7	10.1	9.2	9.2	0.375022	0.0016	0.37342
YMR003W	AIM34	5.8	6	5.8	5.7	0.216496	-0.156913	0.37341
YNL202W	SPS19	6.3	6.8	6.2	6.3	0.518799	0.14553	0.37327
YBR211C	AME1	6.4	6.5	6.4	6.1	0.098986	-0.273945	0.37293
YNL024C-A	KSH1	8.2	8.7	7.1	7.3	0.586398	0.21391	0.37249
YGL213C	SKI8	8.6	8.5	8.5	8	-0.103834	-0.475992	0.37216
YGL098W	USE1	6.8	7	6.6	6.5	0.263067	-0.108799	0.37187
YMR087W		6.9	6.9	6.7	6.3	0.030566	-0.340893	0.37146
YLL019C	KNS1	7.7	8.2	9.3	9.5	0.586474	0.215843	0.37063
YLL038C	ENT4	7.1	7.2	6.8	6.6	0.106486	-0.262197	0.36868
YBR259W		5.7	5.8	7.6	7.3	0.092138	-0.276287	0.36842
YGR183C	QCR9	8.4	9.1	7.8	8.1	0.696661	0.328517	0.36814
YDL006W	PTC1	6.9	7.1	7.3	7.1	0.215029	-0.152663	0.36769
YBR223C	TDP1	5.5	5.7	7.3	7.2	0.198745	-0.167998	0.36674
YDR181C	SAS4	6.1	6.6	7.2	7.3	0.499403	0.134676	0.36473
YMR130W		6.9	7.3	7.2	7.3	0.455415	0.090787	0.36463
YGR052W	FMP48	5.8	6.7	6	6.5	0.867343	0.502924	0.36442
YPR190C	RPC82	8.3	8.4	9	8.7	0.076315	-0.288006	0.36432
YGL219C	MDM34	8.1	8.2	8.6	8.3	0.096788	-0.266595	0.36338
YML051W	GAL80	5.5	5.7	8.6	8.4	0.162725	-0.200656	0.36338
YOR036W	PEP12	7.2	7.7	6.8	6.9	0.410111	0.046972	0.36314
YMR292W	GOT1	6.9	7.3	7.3	7.2	0.311038	-0.051917	0.36295
YBR136W	MEC1	7.3	7.2	9.7	9.2	-0.162138	-0.523764	0.36163
YDL027C		6.9	7.4	7.9	8	0.532394	0.170781	0.36161
YJR112W	NNF1	7.2	7.4	6.8	6.7	0.195804	-0.165401	0.36121
YOL109W	ZEO1	13	13.3	11.7	11.7	0.354963	-0.005383	0.36035
YLR436C	ECM30	8	8.1	9.9	9.6	0.096688	-0.263545	0.36023
YLR362W	STE11	7.4	7.5	7.7	7.4	0.079179	-0.280924	0.3601
YER144C	UBP5	7.4	7.3	9.2	8.7	-0.062894	-0.422831	0.35994
YOR020W-A		6.9	7.3	6.7	6.7	0.330192	-0.029743	0.35993
YLR427W	MAG2	7.3	7.7	8.3	8.3	0.394735	0.035481	0.35925
YLR325C	RPL38	13.2	13.5	12	11.9	0.23916	-0.119823	0.35898
YOR113W	AZF1	7.9	8.2	8.4	8.4	0.281221	-0.076354	0.35758
YDR067C	OCA6	6.1	6.9	6.5	7	0.81838	0.461368	0.35701
YOR289W		6.1	6.9	6.4	6.8	0.788909	0.432297	0.35661
YLR273C	PIG1	5.3	5.5	6.9	6.8	0.251392	-0.105188	0.35658
YER183C	FAU1	7.2	7.4	7.5	7.3	0.186865	-0.169303	0.35617
YOR023C	AHC1	8	8.3	8.5	8.4	0.230867	-0.125143	0.35601
YDL232W	OST4	7.5	7.8	7.1	7.1	0.347863	-0.007838	0.3557
YNL177C	MRPL22	8.1	8.5	7.8	7.9	0.379299	0.024068	0.35523
YOL077W-A	ATP19	8.8	9.4	8.1	8.3	0.575608	0.220679	0.35493
YJL189W	RPL39	13	13.1	11.6	11.4	0.162179	-0.192425	0.3546
YPL233W	NSL1	6.7	7	6.6	6.5	0.26226	-0.091714	0.35397
YDR463W	STP1	9.6	9.8	9.1	9	0.259183	-0.094319	0.3535
YER071C		6.6	6.7	6.4	6.2	0.090248	-0.263149	0.3534
YLR074C	BUD20	9	9.3	8.1	8.1	0.322871	-0.030437	0.35331
YBR057C	MUM2	7.8	7.9	7.6	7.4	0.127816	-0.225369	0.35319
YFL052W		4.6	4.4	5.5	5	-0.141098	-0.494209	0.35311
YBR193C	MED8	7.3	7.3	7	6.6	-0.041726	-0.39475	0.35302
YIL020C	HIS6	7.9	8.1	7.5	7.4	0.167682	-0.185135	0.35282
YPL193W	RSA1	6.4	6.7	6.9	6.8	0.298009	-0.054778	0.35279
YGR262C	BUD32	7.7	8.2	7.3	7.4	0.446341	0.093913	0.35243
YBR233W	PBP2	7.7	7.7	7.3	7	0.041496	-0.310782	0.35228
YOL077C	BRX1	9.5	9.7	9.2	9	0.190136	-0.161857	0.35199
YHR102W	KIC1	8.2	8.1	9.4	8.9	-0.134038	-0.485923	0.35189
YPR021C	AGC1	6.4	7.1	8.3	8.6	0.707308	0.35542	0.35189
YJL003W	COX16	6.3	6.8	5.9	6	0.516252	0.164838	0.35141
YMR230W	RPS10B	12.6	12.8	11.7	11.6	0.23974	-0.111071	0.35081
YOL130W	ALR1	8	8.6	9	9.2	0.611523	0.261061	0.35046
YHR060W	VMA22	7.3	7.4	7.1	6.8	0.095011	-0.255341	0.35035
YJL083W	TAX4	6.2	6.3	7.6	7.3	0.058067	-0.292122	0.35019
YLR426W		6.9	7	7.8	7.5	0.064957	-0.28497	0.34993
YML095C	RAD10	5.7	5.7	5.5	5.2	0.01217	-0.337509	0.34968
YKL134C	2017-10-01	7.5	7.6	8.2	7.9	0.047048	-0.302565	0.34961
YDR512C	EMI1	7.8	7.9	7	6.8	0.162749	-0.186815	0.34956
YNL252C	MRPL17	8.1	8.4	7.6	7.5	0.266543	-0.08295	0.34949
YDR440W	DOT1	6.6	6.7	7.4	7.2	0.085178	-0.264248	0.34943
YBL029W		5.6	6.1	5.9	6	0.483969	0.134775	0.34919
YKR083C	DAD2	6	6.2	5.2	5	0.156126	-0.19237	0.3485
YBR102C	EXO84	8.3	8.4	8.7	8.5	0.168485	-0.179703	0.34819
YBR108W	AIM3	9.4	9.4	9.1	8.8	-0.028526	-0.375722	0.3472
YKR101W	SIR1	6.3	6.2	7.1	6.7	-0.074506	-0.421181	0.34668
YIL156W-B		8.5	8.9	7.5	7.5	0.37268	0.026224	0.34646
YCR091W	KIN82	6.5	6.8	7.4	7.3	0.259571	-0.086541	0.34611
YDL043C	PRP11	6.9	7.2	6.2	6.2	0.310952	-0.034664	0.34562
YOR293W	RPS10A	13.2	13.6	12.3	12.3	0.323642	-0.02175	0.34539
YDR222W		7.7	7.6	7.5	7	-0.118811	-0.463807	0.345
YPR011C		6.4	6.6	7.6	7.5	0.23936	-0.105383	0.34474
YGR263C	SAY1	6.9	7	6.9	6.7	0.124381	-0.220207	0.34459
YJL123C	MTC1	9.7	9.9	9.2	9.1	0.187795	-0.156635	0.34443
YHL024W	RIM4	8.4	8.9	8.5	8.7	0.471319	0.126984	0.34434
YOL164W	BDS1	3.6	3.8	6.7	6.7	0.25158	-0.092728	0.34431
YPR030W	CSR2	5.2	5.1	6.9	6.4	-0.127672	-0.471163	0.34349
YJL090C	DPB11	5.8	5.8	7.5	7.2	0.011349	-0.332041	0.34339
YBR095C	RXT2	7.4	7.4	7.2	6.9	0.027726	-0.315445	0.34317
YIL119C	RPI1	8	8.3	8.3	8.3	0.309157	-0.033877	0.34303
YBR088C	POL30	9.8	10.2	9.1	9.2	0.470515	0.127498	0.34302
YPR003C		7.5	7.5	8.2	7.9	0.003331	-0.33967	0.343
YGR168C		5.1	5.1	6.9	6.6	0.033528	-0.30922	0.34275
YNL259C	ATX1	6.9	7.3	6.8	6.9	0.405251	0.062674	0.34258
YIR003W	AIM21	8.9	9.4	8.9	8.9	0.43341	0.090892	0.34252
YDR200C	VPS64	7.3	7.3	8.1	7.7	-0.024595	-0.366754	0.34216
YJL107C		6.5	6.9	6.6	6.6	0.320827	-0.021159	0.34199
YGR169C	PUS6	5.9	6.4	6.8	7	0.529574	0.187968	0.34161
YLR168C	UPS2	7.4	8	7.8	8.1	0.634652	0.293655	0.341
YGR003W	CUL3	6.9	7.1	7.9	7.8	0.20977	-0.130824	0.34059
YKL194C	MST1	7.1	7.2	7.6	7.4	0.138659	-0.201719	0.34038
YNR048W		6.2	6.3	6.7	6.4	0.051099	-0.288963	0.34006
YIL146C	ATG32	5.6	5.6	6.9	6.6	0.04161	-0.298416	0.34003
YIL077C		5.7	6	6.5	6.5	0.33064	-0.008184	0.33882
YBR197C		6.7	7	7.1	7.1	0.324668	-0.013998	0.33867
YOR380W	RDR1	4.5	5.3	6.8	7.3	0.817313	0.4787	0.33861
YBL107C		7	7	6.8	6.4	-0.03972	-0.378283	0.33856
YBR185C	MBA1	7.7	8.1	7.3	7.4	0.403978	0.066378	0.3376
YAL061W	BDH2	5.7	5.9	5.5	5.4	0.238727	-0.098537	0.33726
YNL149C	PGA2	8.7	8.8	8.6	8.4	0.11905	-0.217282	0.33633
YDL200C	MGT1	6.5	6.8	6.4	6.4	0.301547	-0.034696	0.33624
YMR288W	HSH155	7.9	7.8	8.5	8.1	-0.042605	-0.378163	0.33556
YDL008W	APC11	6.6	6.6	6.2	5.9	0.037757	-0.297685	0.33544
YJL045W		5.2	4.9	5.1	4.6	-0.239018	-0.574438	0.33542
YDR510W	SMT3	10.7	11.1	9.6	9.6	0.316246	-0.018382	0.33463
YKR070W		8.6	8.7	8.7	8.5	0.106326	-0.228104	0.33443
YLR284C	ECI1	5.5	5.7	5.2	5.1	0.210547	-0.123758	0.33431
YGL210W	YPT32	7.7	7.9	7.5	7.4	0.276267	-0.05787	0.33414
YOR195W	SLK19	8.5	8.6	7.9	7.7	0.099205	-0.234746	0.33395
YBR033W	EDS1	4.6	5	5.4	5.5	0.384889	0.051646	0.33324
YDR063W	AIM7	8.4	9.1	7.8	8.1	0.660593	0.32737	0.33322
YGR198W	YPP1	7.9	7.9	9	8.7	0.031225	-0.30151	0.33274
YDR236C	FMN1	6.8	7	7.1	7	0.182111	-0.150145	0.33226
YPR185W	ATG13	7.6	7.8	8.6	8.5	0.182318	-0.149379	0.3317
YHR058C	MED6	7.1	7.3	6.8	6.7	0.218367	-0.11297	0.33134
YAL047C	SPC72	6.7	6.7	7.2	6.9	0.058048	-0.272598	0.33065
YJL155C	FBP26	7.8	8	8	7.9	0.18274	-0.147395	0.33014
YGR186W	TFG1	9.6	9.7	9.7	9.5	0.067329	-0.262558	0.32989
YHR072W-A	NOP10	10	10.5	8.8	8.9	0.497878	0.168386	0.32949
YMR192W	GYL1	8.8	9	8.7	8.6	0.183993	-0.145195	0.32919
YLR256W	HAP1	10	9.9	12.2	11.8	-0.079768	-0.408506	0.32874
YOR115C	TRS33	7.5	7.7	7.8	7.7	0.216833	-0.111163	0.328
YGL079W	KXD1	6.4	6.8	7.1	7.2	0.420553	0.094069	0.32648
YLR233C	EST1	4.5	4.8	7.1	7	0.285924	-0.040049	0.32597
YDR254W	CHL4	5.4	5.3	6.7	6.3	-0.072425	-0.398282	0.32586
YJR097W	JJJ3	5.8	5.9	5.6	5.4	0.189736	-0.135401	0.32514
YNL147W	LSM7	8.5	8.8	7.4	7.3	0.302706	-0.021928	0.32463
YJR036C	HUL4	4	3.9	6.4	6	-0.11507	-0.43955	0.32448
YJL137C	GLG2	6.8	6.6	7.1	6.6	-0.171187	-0.495276	0.32409
YDR196C	CAB5	7.4	7.7	7.4	7.4	0.286305	-0.03761	0.32391
YIL105C	SLM1	8.7	9	8.7	8.7	0.348626	0.025241	0.32338
YLR200W	YKE2	7.9	8	7	6.9	0.148524	-0.174821	0.32335
YNL046W		6.6	6.7	7.4	7.2	0.153228	-0.169621	0.32285
YOR232W	MGE1	10.5	10.9	9.5	9.6	0.398638	0.075897	0.32274
YGR230W	BNS1	7.3	7.6	6.7	6.7	0.306968	-0.015682	0.32265
YNL289W	PCL1	9.1	9.2	8.4	8.2	0.116515	-0.205548	0.32206
YMR110C	HFD1	9.4	9.6	9.2	9.1	0.167572	-0.154423	0.322
YDR308C	SRB7	7.3	7.5	6.2	6.2	0.285283	-0.036678	0.32196
YJL145W	SFH5	9.1	9.1	8.6	8.3	0.014478	-0.307435	0.32191
YNL042W	BOP3	5.9	6.1	7	6.9	0.223351	-0.09836	0.32171
YMR168C	CEP3	6.3	6.4	6.9	6.6	0.036004	-0.285507	0.32151
YCR063W	BUD31	6.7	6.8	6.8	6.6	0.089347	-0.232145	0.32149
YBR289W	SNF5	8.6	8.6	8.6	8.2	0.004827	-0.31633	0.32116
YER129W	SAK1	7.2	7.4	9.3	9.2	0.292305	-0.028826	0.32113
YHR011W	DIA4	6.2	6.4	6.8	6.6	0.116784	-0.203568	0.32035
YPR073C	LTP1	8.9	8.8	8.2	7.8	-0.067039	-0.387063	0.32002
YDR084C	TVP23	8.3	8.1	7.5	7	-0.110516	-0.430076	0.31956
YER182W	FMP10	7.3	7.7	6.9	6.9	0.320717	0.001165	0.31955
YNL062C	GCD10	8.3	8.4	8.5	8.4	0.154335	-0.165154	0.31949
YER030W	CHZ1	8.6	8.7	7.8	7.5	0.07338	-0.246003	0.31938
YMR167W	MLH1	6.8	6.9	7.6	7.3	0.113471	-0.205686	0.31916
YKR004C	ECM9	5.6	6	6.7	6.8	0.435584	0.117631	0.31795
YKL168C	KKQ8	6.8	7.1	7.7	7.7	0.299796	-0.017678	0.31747
YDR248C		7	7.7	6.7	7.1	0.714102	0.396752	0.31735
YPR182W	SMX3	8.1	8.4	7.2	7.2	0.322946	0.006122	0.31682
YPL129W	TAF14	9.3	9.5	8.5	8.4	0.238991	-0.076768	0.31576
YKL079W	SMY1	7.6	7.6	8.5	8.2	-0.005526	-0.321271	0.31575
YPR141C	KAR3	6.7	6.7	7.2	6.8	-0.060012	-0.375518	0.31551
YHR088W	RPF1	8.4	8.4	7.5	7.3	0.079823	-0.234875	0.3147
YIR017C	MET28	5.7	5.8	5.8	5.6	0.103275	-0.211385	0.31466
YBL093C	ROX3	8	8.1	7.6	7.4	0.092267	-0.221935	0.3142
YNL320W		7.6	7.5	7.6	7.2	-0.114706	-0.42823	0.31352
YER114C	BOI2	9.3	9.2	9.7	9.3	-0.049821	-0.363146	0.31333
YJL053W	PEP8	7.9	8	7.8	7.6	0.105698	-0.207443	0.31314
YPL096C-A	ERI1	6.2	6.6	6.4	6.4	0.392825	0.08007	0.31275
YGR258C	RAD2	7.3	7.4	8.5	8.3	0.153781	-0.158923	0.3127
YMR010W		8.3	8.4	9.1	8.9	0.19202	-0.120557	0.31258
YNL309W	STB1	8.1	8	7.5	7.1	-0.037686	-0.349663	0.31198
YMR256C	COX7	9.5	9.8	7.1	7.2	0.326242	0.014816	0.31143
YPR023C	EAF3	8.4	8.7	9	9	0.350327	0.039167	0.31116
YJL129C	TRK1	7.4	7.4	9.5	9.3	0.014531	-0.295751	0.31028
YNL261W	ORC5	7.4	7.4	8.2	7.9	0.010799	-0.299327	0.31013
YOR058C	ASE1	8	8.1	8.8	8.6	0.147125	-0.162839	0.30996
YNL036W	NCE103	8.9	9.5	8.2	8.4	0.536159	0.226433	0.30973
YPR100W	MRPL51	7.8	8.3	7.4	7.7	0.576654	0.26702	0.30963
YGL220W	FRA2	8.5	8.6	8	7.8	0.097508	-0.212108	0.30962
YNR027W	BUD17	6.7	6.9	7.5	7.4	0.201192	-0.10795	0.30914
YLR392C	ART10	5.9	6	6.9	6.7	0.119424	-0.189702	0.30913
YDR081C	PDC2	8	8.1	8.6	8.4	0.095594	-0.212103	0.3077
YIL016W	SNL1	7.9	8.4	7.7	7.9	0.494343	0.186686	0.30766
YNL144C		5.5	5.4	6.9	6.5	-0.075004	-0.382476	0.30747
YDR496C	PUF6	9.9	10	9.4	9.3	0.17878	-0.128618	0.3074
YFR038W	IRC5	7.4	7.7	8.7	8.6	0.265096	-0.042123	0.30722
YDL113C	ATG20	7.4	7.7	8.1	8.1	0.289933	-0.017116	0.30705
YGR040W	KSS1	6.9	6.8	8	7.6	-0.094336	-0.400915	0.30658
YMR090W		6.6	7	6.6	6.7	0.438181	0.132463	0.30572
YML005W	TRM12	6.9	6.8	7.3	6.9	-0.124606	-0.429674	0.30507
YPL112C	PEX25	8.2	8.5	8.3	8.3	0.323098	0.018081	0.30502
YGR056W	RSC1	8	8	8.6	8.3	-0.014115	-0.319116	0.305
YAL051W	OAF1	7.8	7.9	8.5	8.3	0.062367	-0.242346	0.30471
YOR171C	LCB4	9.1	9.2	9.3	9.1	0.121987	-0.182718	0.30471
YGR167W	CLC1	10.7	11	9.8	9.8	0.305561	0.000951	0.30461
YIR001C	SGN1	8	7.8	7.2	6.8	-0.108412	-0.412454	0.30404
YHR119W	SET1	7.8	7.8	9.1	8.9	0.044443	-0.259513	0.30396
YDR191W	HST4	6.8	7.1	6.4	6.4	0.325	0.021054	0.30395
YDR511W	ACN9	7.4	7.4	7	6.8	0.071306	-0.232268	0.30357
YKR007W	MEH1	7.4	7.6	6.8	6.8	0.238278	-0.065231	0.30351
YNL065W	AQR1	7.4	7.9	8.1	8.3	0.503129	0.199788	0.30334
YDR161W		8.7	8.9	8.7	8.6	0.181401	-0.12192	0.30332
YEL044W	IES6	8.5	8.8	7.8	7.8	0.289556	-0.013408	0.30296
YLL003W	SFI1	5.4	5.5	8	7.7	0.078233	-0.224498	0.30273
YCR075W-A		7.2	7.5	5.6	5.5	0.289977	-0.012312	0.30229
YDR259C	YAP6	5.6	6.2	6.2	6.5	0.609995	0.308839	0.30116
YOR127W	RGA1	8.2	8.2	9.6	9.3	0.015987	-0.285088	0.30107
YKL204W	EAP1	9.8	10.1	8.9	8.8	0.26189	-0.038943	0.30083
YOR089C	VPS21	8.7	8.8	7.9	7.7	0.090731	-0.209723	0.30045
YLR116W	MSL5	7.4	7.6	7.9	7.8	0.194162	-0.106251	0.30041
YJL096W	MRPL49	7.2	7.3	7.1	6.9	0.115969	-0.183969	0.29994
YOL043C	NTG2	4.6	5.1	6.3	6.5	0.489185	0.189355	0.29983
YDR206W	EBS1	8	8.6	9.4	9.7	0.55075	0.251162	0.29959
YNL251C	NRD1	9.8	10.1	9.4	9.4	0.297471	-0.002104	0.29957
YPR125W	YLH47	8.7	8.8	8.1	7.9	0.148021	-0.151488	0.29951
YDR410C	STE14	7.3	7.4	7.3	7.1	0.069894	-0.229287	0.29918
YOL002C	IZH2	8.5	8.7	8.4	8.3	0.249562	-0.048529	0.29809
YDR031W	MIC14	6.8	7.2	6.5	6.6	0.416185	0.118432	0.29775
YOR357C	SNX3	8	8.3	7.7	7.7	0.283245	-0.014428	0.29767
YEL029C	BUD16	7.1	7.2	7.3	7.1	0.094542	-0.202727	0.29727
YNL084C	END3	9.6	9.8	8.8	8.8	0.275071	-0.021766	0.29684
YER109C	FLO8	5.9	5.9	8	7.7	0.051313	-0.24552	0.29683
YDL057W		6.5	6.8	6.2	6.3	0.342684	0.045906	0.29678
YJR125C	ENT3	10.2	10.2	9.4	9.1	0.070947	-0.225815	0.29676
YKL119C	VPH2	7.1	7.4	7	7	0.277774	-0.018592	0.29637
YOR385W		6.5	6.7	6.6	6.5	0.221521	-0.074775	0.2963
YBL050W	SEC17	9.9	10.1	9.1	9	0.236103	-0.059907	0.29601
YFR048W	RMD8	7.4	7.7	8.1	8.1	0.29149	-0.004351	0.29584
YKR087C	OMA1	7.6	7.7	7.5	7.3	0.101018	-0.194471	0.29549
YKL196C	YKT6	9.7	10	9.3	9.3	0.274247	-0.020698	0.29494
YNL225C	CNM67	7.3	7.3	7	6.8	0.027285	-0.267479	0.29476
YBR187W	GDT1	9.1	9.4	9.5	9.5	0.265564	-0.028221	0.29379
YPL174C	NIP100	4.9	5.6	7.2	7.6	0.725591	0.432294	0.2933
YDR285W	ZIP1	3.1	3.6	5.1	5.3	0.505323	0.212424	0.2929
YBR271W		7.2	7.2	7.5	7.3	0.056775	-0.235972	0.29275
YNL094W	APP1	5.9	6.5	8.4	8.7	0.596292	0.303704	0.29259
YMR239C	RNT1	6.7	6.9	6.9	6.8	0.217137	-0.075279	0.29242
YDR302W	GPI11	7.3	7.4	6.7	6.5	0.164535	-0.127149	0.29168
YDR195W	REF2	7.5	7.8	7.5	7.5	0.290509	-0.000677	0.29119
YIL068C	SEC6	7.7	7.9	8.7	8.6	0.15152	-0.139469	0.29099
YJR120W		5.3	5.4	7.6	7.4	0.115529	-0.17463	0.29016
YLR351C	NIT3	9.6	9.9	9.6	9.5	0.203966	-0.085939	0.2899
YPL237W	SUI3	11	11.2	10.7	10.7	0.234409	-0.055317	0.28973
YJR135C	MCM22	5.4	5.5	5.9	5.8	0.17898	-0.110469	0.28945
YML118W	NGL3	4.3	4.1	5.4	4.9	-0.214857	-0.503898	0.28904
YDR399W	HPT1	9.4	9.5	8.9	8.7	0.117555	-0.171284	0.28884
YNL049C	SFB2	8.7	8.7	9.6	9.3	-0.001915	-0.290735	0.28882
YPR174C		7.1	7.2	7.1	6.9	0.159288	-0.12948	0.28877
YCR054C	CTR86	7.6	7.5	7.5	7.2	-0.07467	-0.363338	0.28867
YCL036W	GFD2	6.7	6.9	7.5	7.4	0.200969	-0.08751	0.28848
YOR372C	NDD1	8.8	8.9	8.9	8.7	0.156429	-0.131548	0.28798
YKL075C		6.8	7	7.4	7.3	0.187363	-0.100447	0.28781
YDR140W	MTQ2	6.5	6.3	7.1	6.6	-0.178368	-0.466156	0.28779
YIL064W	SEE1	8.5	8.5	8	7.7	0.012963	-0.274703	0.28767
YAL026C-A		4.1	4	5.9	5.5	-0.095067	-0.382601	0.28753
YKL021C	MAK11	8	8.1	8.4	8.1	0.053508	-0.233731	0.28724
YKR017C		5.5	5.7	7.1	7	0.242411	-0.044617	0.28703
YBR244W	GPX2	9.1	9.2	8.3	8.1	0.094353	-0.192232	0.28659
YGL090W	LIF1	4.4	5.1	6.2	6.7	0.706117	0.420558	0.28556
YLR275W	SMD2	6.6	6.9	5.6	5.6	0.220987	-0.063948	0.28493
YBR254C	TRS20	7.2	7.5	6.7	6.8	0.327649	0.043009	0.28464
YNL068C	FKH2	8.4	8.5	9.1	8.9	0.06123	-0.223147	0.28438
YDR377W	ATP17	10.2	10.8	9.1	9.5	0.60632	0.321952	0.28437
YGL073W	HSF1	8.2	8.3	8.9	8.8	0.129263	-0.153408	0.28267
YBR179C	FZO1	7.8	7.9	8.7	8.6	0.146581	-0.135898	0.28248
YDR364C	CDC40	6.5	6.8	7.4	7.4	0.278299	-0.004148	0.28245
YOR383C	FIT3	3.9	4.2	6.5	6.6	0.324901	0.042928	0.28197
YBR290W	BSD2	7.7	7.9	7.5	7.5	0.260898	-0.019684	0.28058
YER127W	LCP5	8.3	8.6	7.6	7.5	0.224161	-0.055678	0.27984
YCR076C		8.3	8.7	7.3	7.4	0.417065	0.137396	0.27967
YBR233W-A	DAD3	6.4	6.4	5.7	5.4	-0.006638	-0.2862	0.27956
YOR038C	HIR2	7.9	7.9	8.5	8.2	-0.010535	-0.28948	0.27895
YDR185C	UPS3	5.8	6	5.3	5.3	0.224782	-0.054158	0.27894
YGL134W	PCL10	5.2	4.8	6.9	6.2	-0.418108	-0.69704	0.27893
YDL216C	RRI1	5.7	5.5	6.5	6	-0.159885	-0.438726	0.27884
YDL193W	NUS1	8.8	8.9	8.3	8.2	0.095829	-0.182947	0.27878
YOL100W	PKH2	6.8	7	8.3	8.2	0.185281	-0.09339	0.27867
YLR240W	VPS34	7.3	7.5	8.6	8.4	0.154998	-0.123501	0.2785
YGL101W		7.5	7.6	7.4	7.2	0.074427	-0.203744	0.27817
YHR150W	PEX28	5.4	5.9	6.8	7	0.462857	0.184998	0.27786
YLR382C	NAM2	7.4	7.3	8.8	8.3	-0.172722	-0.450449	0.27773
YGR170W	PSD2	7.4	7.4	9.4	9.1	0.06434	-0.212985	0.27733
YJL124C	LSM1	8.7	9	8.4	8.4	0.308266	0.031205	0.27706
YHR046C	INM1	7.6	7.8	7.7	7.6	0.209125	-0.067771	0.2769
YDR300C	PRO1	8.8	8.8	8.7	8.4	-0.037492	-0.314351	0.27686
YKR003W	OSH6	8.6	8.8	8.8	8.8	0.263418	-0.013147	0.27657
YMR070W	MOT3	8.2	8.4	8.8	8.7	0.251557	-0.024883	0.27644
YLR425W	TUS1	6.8	6.7	8.7	8.4	-0.027958	-0.304208	0.27625
YDR073W	SNF11	6.3	7.2	7	7.7	0.91463	0.638459	0.27617
YDR255C	RMD5	6	6.4	7.3	7.4	0.359927	0.084632	0.27529
YGR074W	SMD1	7.4	7.7	6.6	6.7	0.374304	0.099831	0.27447
YGR158C	MTR3	8.2	8.4	7.6	7.4	0.138315	-0.135684	0.274
YLR033W	RSC58	7.7	7.8	7.9	7.8	0.131401	-0.142576	0.27398
YDR068W	DOS2	7.8	7.9	7.2	7	0.12928	-0.144691	0.27397
YMR275C	BUL1	5.7	5.6	9.8	9.4	-0.063091	-0.337014	0.27392
YNL041C	COG6	8.2	8.3	8.8	8.6	0.074	-0.199803	0.2738
YNL107W	YAF9	6.7	7.1	5.8	5.9	0.430993	0.158646	0.27235
YBR245C	ISW1	9.8	9.9	10	9.8	0.084565	-0.187371	0.27194
YDR347W	MRP1	8.2	8.4	8.8	8.8	0.278972	0.007483	0.27149
YDR378C	LSM6	7.9	8.2	7.6	7.7	0.354895	0.083607	0.27129
YER051W	JHD1	5.8	6	7	6.9	0.174874	-0.096332	0.27121
YHR087W	RTC3	10.2	11.1	8.7	9.4	0.934921	0.663768	0.27115
YJL016W		7.7	8.1	8.9	9	0.356839	0.08578	0.27106
YBR028C		7	7.1	8.1	7.9	0.080317	-0.190558	0.27087
YER059W	PCL6	7.5	7.4	7.5	7.1	-0.116002	-0.386739	0.27074
YJL156C	SSY5	7.8	8.1	8.3	8.3	0.262171	-0.008526	0.2707
YKR027W	BCH2	7.3	7.1	8.4	8	-0.119714	-0.390378	0.27066
YDR528W	HLR1	6.4	6.3	7.2	6.9	-0.086701	-0.356689	0.26999
YNL217W		7.1	6.9	7.9	7.4	-0.223791	-0.493339	0.26955
YIL017C	VID28	7	7.2	8.4	8.3	0.153559	-0.115949	0.26951
YGL020C	GET1	8.6	8.6	8.1	7.8	0.026377	-0.24303	0.26941
YNR033W	ABZ1	8.3	8.1	9.1	8.6	-0.200273	-0.469572	0.2693
YNL131W	TOM22	10.6	10.9	9.6	9.6	0.293191	0.02441	0.26878
YOR197W	MCA1	10.5	10.4	10.1	9.8	-0.041635	-0.310147	0.26851
YOR188W	MSB1	8.4	8.2	9.4	9.1	-0.117166	-0.385152	0.26799
YOR328W	PDR10	3.5	3.2	8.2	7.6	-0.304727	-0.572499	0.26777
YDR424C	DYN2	8.3	8.6	7.6	7.6	0.262225	-0.005393	0.26762
YNL246W	VPS75	8.5	8.8	8.2	8.2	0.254029	-0.013423	0.26745
YER037W	PHM8	8.7	9.2	8.2	8.4	0.496625	0.229577	0.26705
YAL019W	FUN30	9.5	9.5	10.2	9.8	-0.050689	-0.316892	0.2662
YJR003C		7.6	7.5	8	7.7	-0.016476	-0.282272	0.2658
YPL057C	SUR1	8	8.2	8.6	8.5	0.193861	-0.071395	0.26526
YLL036C	PRP19	7.9	7.8	8.2	7.9	-0.077844	-0.342968	0.26512
YOL076W	MDM20	8.9	8.9	9.3	9	0.001277	-0.263847	0.26512
YDR313C	PIB1	6.1	6.3	7.2	7.2	0.200305	-0.064763	0.26507
YIR026C	YVH1	8.2	8.2	8	7.8	0.04173	-0.223105	0.26484
YLR015W	BRE2	6.7	6.8	7	6.9	0.134952	-0.129855	0.26481
YHR039C-A	VMA10	11	11.1	10	9.9	0.147521	-0.117247	0.26477
YIR010W	DSN1	7.4	7.5	8	7.8	0.131782	-0.132755	0.26454
YIL101C	XBP1	7.3	7.6	7.6	7.7	0.333001	0.068676	0.26432
YOR091W	TMA46	9.9	10.1	9.2	9.1	0.236775	-0.0272	0.26398
YLR077W	FMP25	7.7	7.7	8.4	8.1	-0.037439	-0.300968	0.26353
YGL130W	CEG1	8.4	8.5	8.2	8.1	0.155653	-0.107722	0.26337
YIL129C	TAO3	9.2	9.1	11	10.6	-0.086027	-0.349148	0.26312
YMR184W	ADD37	8.9	9.2	8.1	8.1	0.29064	0.028155	0.26249
YLR022C	SDO1	8.4	8.6	8.1	8	0.15799	-0.104274	0.26226
YDR109C		7.1	7.4	7.9	7.9	0.26168	-0.00043	0.26211
YGR271C-A	EFG1	7.5	7.4	6.5	6.1	-0.128389	-0.390417	0.26203
YKL041W	VPS24	7.5	7.8	6.9	6.9	0.304659	0.042968	0.26169
YLR395C	COX8	9.4	9.9	8.4	8.6	0.528402	0.266712	0.26169
YNL087W	TCB2	9	9	9.7	9.4	-0.0579	-0.319393	0.26149
YOL007C	CSI2	8.5	8.6	7.9	7.7	0.060211	-0.201154	0.26137
YGL059W	PKP2	7	6.9	7.9	7.6	-0.025878	-0.287096	0.26122
YER045C	ACA1	6.6	6.9	7	7.1	0.302101	0.041246	0.26085
YOL124C	TRM11	8.1	8	8	7.6	-0.100934	-0.361194	0.26026
YDR071C	PAA1	10.2	10.5	9.3	9.3	0.289939	0.029999	0.25994
YDR404C	RPB7	8.1	8.2	7.8	7.6	0.107409	-0.15244	0.25985
YBL040C	ERD2	9.3	9.2	8.8	8.5	-0.056903	-0.316545	0.25964
YAR028W		7.8	7.9	7.5	7.3	0.078684	-0.180634	0.25932
YCL050C	APA1	11	11.1	9.5	9.4	0.144742	-0.114462	0.2592
YMR174C	PAI3	6.2	6.6	5	5.1	0.397372	0.138352	0.25902
YER093C	TSC11	7	7.1	8.7	8.6	0.151704	-0.107292	0.259
YLR330W	CHS5	9.9	10	9.9	9.8	0.164629	-0.093927	0.25856
YML092C	PRE8	10.3	10.5	9.4	9.4	0.23447	-0.023905	0.25838
YNL312W	RFA2	9.1	9.4	8.2	8.3	0.311533	0.053661	0.25787
YLR381W	CTF3	5.7	5.6	7.4	7	-0.161689	-0.41943	0.25774
YGR084C	MRP13	8.5	8.6	8	7.8	0.118335	-0.139343	0.25768
YMR178W		8.7	8.6	8.7	8.3	-0.113656	-0.371324	0.25767
YBR200W	BEM1	7.9	8	8.4	8.2	0.104706	-0.152942	0.25765
YPR020W	ATP20	9.3	9.8	7.9	8.1	0.510981	0.253885	0.2571
YOR329C	SCD5	8.8	9	9.2	9.2	0.18986	-0.067169	0.25703
YBR215W	HPC2	7.9	8.1	7.9	7.8	0.139386	-0.117443	0.25683
YGL251C	HFM1	4.6	4.6	6.9	6.7	0.035897	-0.220381	0.25628
YNL004W	HRB1	8.9	9	8.8	8.6	0.094252	-0.161959	0.25621
YMR033W	ARP9	8.1	8.1	8.2	7.9	0.000173	-0.256014	0.25619
YDL136W	RPL35B	13.8	14.1	12.9	12.9	0.257761	0.001675	0.25609
YHR112C		8.3	8.4	8.5	8.3	0.086535	-0.169452	0.25599
YDL204W	RTN2	8.3	8.6	8.1	8.1	0.285041	0.029114	0.25593
YOR184W	SER1	11	10.7	10.7	10.1	-0.337126	-0.59264	0.25551
YBR156C	SLI15	7	7.1	7.5	7.4	0.104496	-0.150513	0.25501
YOR021C		9.4	9.6	8.7	8.6	0.152993	-0.101829	0.25482
YFR005C	SAD1	7.1	6.9	7.9	7.5	-0.143369	-0.397943	0.25457
YDR265W	PEX10	5.5	5.7	6.5	6.4	0.153371	-0.101184	0.25455
YEL024W	RIP1	9.9	10.5	9	9.3	0.586986	0.332627	0.25436
YPL254W	HFI1	7.5	7.6	8	7.8	0.068331	-0.184988	0.25332
YMR311C	GLC8	9.3	9.6	8.2	8.3	0.32392	0.070835	0.25309
YDR456W	NHX1	8.7	9	9.1	9.2	0.317937	0.064987	0.25295
YKL022C	CDC16	8	7.9	8.6	8.2	-0.077722	-0.330341	0.25262
YER012W	PRE1	9.5	9.6	9.4	9.2	0.091649	-0.160593	0.25224
YHR089C	GAR1	10.4	10.7	9.3	9.2	0.233292	-0.017852	0.25114
YGR037C	ACB1	11.3	11.6	9.8	9.8	0.292862	0.041986	0.25088
YFR022W	ROG3	5.8	6.6	7.8	8.4	0.835722	0.585496	0.25023
YDR240C	SNU56	6.9	6.8	7.4	7.1	-0.066487	-0.316694	0.25021
YER139C	RTR1	6.6	6.9	6.5	6.7	0.36896	0.118894	0.25007
YGR163W	GTR2	7.8	8	7.9	7.8	0.137988	-0.11149	0.24948
YER079W		7.2	7.2	6.5	6.3	0.071062	-0.178376	0.24944
YNL125C	ESBP6	8.5	9.1	9.4	9.8	0.603039	0.353662	0.24938
YML001W	YPT7	9.8	10	9.2	9.2	0.234716	-0.014468	0.24918
YPL211W	NIP7	8.9	9.1	8.6	8.6	0.246167	-0.002821	0.24899
YLR166C	SEC10	8.6	8.5	9.1	8.8	-0.119127	-0.368073	0.24895
YNL201C	PSY2	8	8.1	8.8	8.6	0.08662	-0.161656	0.24828
YDL191W	RPL35A	13.9	14.2	13	13.1	0.271593	0.024196	0.2474
YMR043W	MCM1	9.2	9.3	8.8	8.7	0.096848	-0.150514	0.24736
YKL137W	CMC1	7.2	7.9	6.6	7	0.654462	0.407164	0.2473
YDR361C	BCP1	8.7	8.9	8.4	8.3	0.198031	-0.048852	0.24688
YGR216C	GPI1	6.8	7	8.1	8.1	0.243221	-0.003628	0.24685
YLR433C	CNA1	8.4	8.2	8.3	7.9	-0.156758	-0.403554	0.2468
YHR063C	PAN5	9.5	9.6	9.2	9.1	0.129594	-0.117157	0.24675
YML076C	WAR1	7.4	7.2	8.7	8.2	-0.18905	-0.435663	0.24661
YDR141C	DOP1	9.3	9.2	10.5	10.2	-0.116761	-0.363147	0.24639
YDR172W	SUP35	11.5	11.4	11.4	11.1	-0.081125	-0.327457	0.24633
YBR004C	GPI18	7.2	7	7.9	7.5	-0.197884	-0.443976	0.24609
YMR074C		9.4	9.8	9.2	9.3	0.34578	0.09996	0.24582
YNL005C	MRP7	8.4	8.6	8.5	8.5	0.218635	-0.026634	0.24527
YBR119W	MUD1	6.9	7.1	6.7	6.7	0.264971	0.020052	0.24492
YDR394W	RPT3	10.3	10.5	10	9.9	0.124426	-0.119814	0.24424
YAL016W	TPD3	11	11.2	10.5	10.4	0.189188	-0.054558	0.24375
YML055W	SPC2	8	8.4	7.4	7.4	0.309671	0.066028	0.24364
YER162C	RAD4	6.5	6.8	7.1	7.1	0.252372	0.009154	0.24322
YGR122W		6.6	6.6	7.3	7.1	0.022602	-0.220579	0.24318
YJL181W		6.4	6.4	7.6	7.4	0.043836	-0.199253	0.24309
YDR280W	RRP45	8	7.9	7.5	7.2	-0.043676	-0.286754	0.24308
YOR064C	YNG1	5.3	5.6	6.3	6.3	0.302005	0.059159	0.24285
YEL004W	YEA4	6.6	6.5	6.9	6.5	-0.110735	-0.353329	0.24259
YCL061C	MRC1	7.5	7.5	7.9	7.6	0.003932	-0.238576	0.24251
YMR309C	NIP1	11.3	11.6	11.6	11.6	0.262578	0.02018	0.2424
YOL128C	YGK3	5.7	5.6	6.8	6.5	-0.049333	-0.291618	0.24229
YFR011C	AIM13	8.3	8.7	7.7	7.8	0.329615	0.087368	0.24225
YPL055C	LGE1	7.9	8.2	7.7	7.7	0.236942	-0.004928	0.24187
YDR051C	DET1	8	8.2	8	7.9	0.169327	-0.072289	0.24162
YFL034W		7.6	7.7	8.5	8.4	0.093912	-0.147651	0.24156
YDR263C	DIN7	5	5.4	6.6	6.7	0.376524	0.135016	0.24151
YPL183W-A	RTC6	8	8.4	7	7.1	0.3891	0.14851	0.24059
YNL021W	HDA1	8	7.8	8.6	8.2	-0.230053	-0.470102	0.24005
YGL045W	RIM8	6.7	6.8	7.2	7	0.064788	-0.174882	0.23967
YOR290C	SNF2	9.5	9.5	10.7	10.4	-0.014767	-0.254184	0.23942
YDR371W	CTS2	6.7	6.5	7.4	7.1	-0.14535	-0.384751	0.2394
YJR069C	HAM1	9.7	9.9	8.2	8.2	0.192669	-0.046408	0.23908
YNL118C	DCP2	9.5	9.7	9.9	9.8	0.178838	-0.060056	0.23889
YFR028C	CDC14	8.9	8.8	9.2	8.9	-0.034351	-0.272859	0.23851
YER062C	HOR2	10.7	11	9.6	9.6	0.247484	0.009223	0.23826
YDR098C	GRX3	10.3	10.4	9.1	9	0.126964	-0.111217	0.23818
YGR062C	COX18	5.7	5.7	6.4	6.2	0.035495	-0.202384	0.23788
YGL018C	JAC1	7.1	7.5	6.4	6.6	0.480681	0.243354	0.23733
YKR057W	RPS21A	12.6	13	11.4	11.6	0.412699	0.175729	0.23697
YPL152W	RRD2	7.8	7.8	7.6	7.3	-0.014698	-0.25142	0.23672
YPL164C	MLH3	5.5	5.7	7	7	0.183226	-0.052795	0.23602
YLR287C		8.3	8.4	8.1	7.9	0.055927	-0.179972	0.2359
YLR132C		6.2	6.1	6.9	6.6	-0.101437	-0.33733	0.23589
YPL083C	SEN54	6.4	6.5	7.4	7.3	0.130561	-0.10532	0.23588
YHR096C	HXT5	7.6	7.3	7.1	6.6	-0.286674	-0.521732	0.23506
YLR292C	SEC72	8.8	9	8.2	8.2	0.212682	-0.021885	0.23457
YHR201C	PPX1	8.9	9	8.7	8.7	0.147583	-0.086789	0.23437
YHR033W		6.3	6.9	8.1	8.5	0.689926	0.455945	0.23398
YML105C	SEC65	9	9.3	8.3	8.3	0.295453	0.061614	0.23384
YOR285W	RDL1	10.7	11	9.6	9.6	0.28098	0.047147	0.23383
YDR213W	UPC2	7.6	7.3	8.4	7.9	-0.264969	-0.498341	0.23337
YGL178W	MPT5	8.9	9	9.4	9.3	0.122308	-0.110802	0.23311
YBL095W		5.8	6.1	7.5	7.6	0.301278	0.06833	0.23295
YPL225W		10.5	10.8	9.6	9.5	0.221126	-0.011777	0.2329
YOR145C	PNO1	9.5	9.7	9	8.9	0.215761	-0.016782	0.23254
YDR515W	SLF1	7.6	7.4	6.8	6.3	-0.215164	-0.44734	0.23218
YOR216C	RUD3	8.1	8.4	8	8	0.243676	0.011494	0.23218
YGR207C		9.7	10.1	8.8	9	0.360459	0.128513	0.23195
YLR388W	RPS29A	12.1	12.4	10.6	10.7	0.317841	0.086109	0.23173
YJR075W	HOC1	9.7	9.7	9.4	9.2	-0.007293	-0.238951	0.23166
YJL004C	SYS1	6.7	7	6.6	6.7	0.310394	0.078828	0.23157
YMR260C	TIF11	12.4	12.5	11.7	11.6	0.096057	-0.135491	0.23155
YBR188C	NTC20	6.3	6.8	5.8	6.1	0.515197	0.28378	0.23142
YOL089C	HAL9	7.5	7.4	8.2	7.9	-0.118247	-0.349332	0.23109
YOL033W	MSE1	6.7	6.9	7.6	7.6	0.159056	-0.070921	0.22998
YML097C	VPS9	7.7	7.9	7.7	7.7	0.208927	-0.021007	0.22993
YHL030W	ECM29	10.2	10	10.9	10.4	-0.228552	-0.458388	0.22984
YER163C		8	8	8.3	8.1	0.019478	-0.210037	0.22952
YHR035W		4.9	4.5	5.9	5.2	-0.456868	-0.686132	0.22926
YPL175W	SPT14	7.3	7.3	8	7.8	0.085014	-0.143872	0.22889
YJR059W	PTK2	9.4	9.5	10.2	10.1	0.11986	-0.108641	0.2285
YEL041W	YEF1	5.7	6	6.6	6.6	0.315143	0.086809	0.22833
YIR005W	IST3	6.4	6.4	6	5.7	-0.006317	-0.234594	0.22828
YDL077C	VAM6	7.2	7.1	8.5	8.2	-0.14282	-0.370879	0.22806
YDL064W	UBC9	8.9	9.2	7.9	8	0.322657	0.094947	0.22771
YHL015W	RPS20	13.5	13.6	12.4	12.3	0.122936	-0.10431	0.22725
YDL130W-A	STF1	8.6	8.9	7.7	7.8	0.295395	0.068424	0.22697
YDR303C	RSC3	8.6	8.5	9.2	9	-0.048025	-0.274847	0.22682
YDR393W	SHE9	5.8	5.9	6.8	6.7	0.051937	-0.174702	0.22664
YOR359W	VTS1	8.1	8.1	8	7.8	-0.031905	-0.258359	0.22645
YKL198C	PTK1	6.8	6.8	8.4	8.2	0.043351	-0.182933	0.22628
YNL029C	KTR5	6.5	6.7	7.8	7.7	0.147288	-0.078883	0.22617
YHR155W	YSP1	7.4	7.6	9.3	9.2	0.130265	-0.095731	0.226
YGL131C	SNT2	6.6	6.3	9.1	8.5	-0.358551	-0.58439	0.22584
YKR030W	GMH1	7.1	7.3	7.1	7	0.176577	-0.048931	0.22551
YPR167C	MET16	5	5.5	5.6	5.9	0.529294	0.304481	0.22481
YLR336C	SGD1	8.2	8.2	8.5	8.3	0.029398	-0.19531	0.22471
YDL188C	PPH22	9.5	9.5	9.6	9.4	0.06013	-0.164468	0.2246
YBR013C		6.4	6.3	6.3	5.9	-0.112425	-0.336769	0.22434
YHR166C	CDC23	7	7.1	7.5	7.4	0.098847	-0.125267	0.22411
YOR257W	CDC31	6.8	7.1	6.4	6.4	0.22638	0.002464	0.22392
YMR026C	PEX12	6.2	6.9	7.3	7.8	0.7327	0.508921	0.22378
YDR224C	HTB1	12	12.4	10.6	10.7	0.348638	0.124867	0.22377
YNL132W	KRE33	10.1	10.1	10.4	10.1	-0.047319	-0.270929	0.22361
YDR072C	IPT1	8.7	8.6	9.1	8.8	-0.096339	-0.319857	0.22352
YKR020W	VPS51	6.6	7.1	5.7	6	0.474921	0.252302	0.22262
YGR098C	ESP1	6.9	7	9.2	9	0.074973	-0.147444	0.22242
YFL017W-A	SMX2	7	7.5	5.8	6.1	0.567721	0.345358	0.22236
YMR053C	STB2	5.1	5.2	7.3	7.1	0.082977	-0.139247	0.22222
YNL191W	DUG3	7.3	7.4	7.7	7.5	0.053557	-0.1686	0.22216
YML021C	UNG1	7.6	7.6	7.8	7.5	-0.016675	-0.238379	0.2217
YHR052W	CIC1	9.4	9.8	8.8	9	0.394954	0.173305	0.22165
YLR276C	DBP9	9	9.1	9.1	9	0.070804	-0.150631	0.22143
YKL138C-A	HSK3	6.5	7.1	5.3	5.6	0.569425	0.348151	0.22127
YOL148C	SPT20	7.6	7.5	8.3	7.9	-0.101242	-0.322299	0.22106
YOL070C	NBA1	9.9	10	9.3	9.2	0.152865	-0.068071	0.22094
YOR128C	ADE2	10.2	10.3	10	9.9	0.153268	-0.067623	0.22089
YBR125C	PTC4	7.3	7.4	7.9	7.7	0.104718	-0.1161	0.22082
YOR069W	VPS5	8.8	8.9	8.4	8.2	0.044928	-0.175749	0.22068
YIL010W	DOT5	8.8	9	8.4	8.3	0.151131	-0.069428	0.22056
YJL066C	MPM1	8.8	9.1	7.9	7.9	0.269751	0.049322	0.22043
YPL013C	MRPS16	7.6	7.9	6.5	6.6	0.309536	0.089157	0.22038
YJR062C	NTA1	7.2	7.4	7.9	7.9	0.221728	0.001434	0.22029
YJL087C	TRL1	8.2	8.1	8.3	8	-0.110814	-0.331051	0.22024
YPL209C	IPL1	5.7	5.7	5.5	5.2	-0.044227	-0.264461	0.22023
YGR173W	RBG2	9.6	9.7	9.1	8.9	0.065531	-0.154677	0.22021
YGR088W	CTT1	8.6	8.8	8.5	8.5	0.272494	0.052436	0.22006
YFR055W	IRC7	8.6	9	8.8	9	0.397406	0.17743	0.21998
YMR049C	ERB1	10.3	10.4	9.8	9.7	0.133157	-0.086789	0.21995
YLR386W	VAC14	8.6	8.7	8.7	8.6	0.112026	-0.107861	0.21989
YAL031C	GIP4	7	7.2	8.2	8.1	0.190877	-0.028982	0.21986
YOR111W		5.8	5.8	5.7	5.5	0.038144	-0.181668	0.21981
YDR484W	VPS52	7.3	7.3	7.6	7.4	-0.002873	-0.222528	0.21966
YGR099W	TEL2	6.8	6.9	7.9	7.8	0.176142	-0.043285	0.21943
YPL132W	COX11	6.5	6.3	7	6.6	-0.165229	-0.384296	0.21907
YML007W	YAP1	9.1	9.4	9.2	9.3	0.261376	0.042343	0.21903
YJR068W	RFC2	8.6	8.6	8.5	8.3	0.06684	-0.152067	0.21891
YMR004W	MVP1	8.2	8.3	8.4	8.3	0.117831	-0.101078	0.21891
YGL172W	NUP49	9.1	9.3	8.8	8.7	0.155866	-0.062968	0.21883
YPL001W	HAT1	7.6	7.8	7.4	7.4	0.220276	0.002088	0.21819
YDR322C-A	TIM11	8.6	9	7.8	8	0.408222	0.190091	0.21813
YER133W	GLC7	10.9	11.1	10.3	10.3	0.148736	-0.069154	0.21789
YBR176W	ECM31	7.5	7.3	7	6.6	-0.172427	-0.389717	0.21729
YFL036W	RPO41	9.2	9.3	10.1	10	0.104624	-0.112476	0.2171
YOR279C	RFM1	6.1	6.2	6.3	6.2	0.085304	-0.131762	0.21707
YMR002W	MIC17	11.2	11.6	9.6	9.8	0.429446	0.21245	0.217
YHR079C	IRE1	6.9	6.8	9.2	8.9	-0.034381	-0.2511	0.21672
YGR162W	TIF4631	11.7	11.7	11.8	11.5	-0.052835	-0.269474	0.21664
YGL194C	HOS2	7.3	7.4	7.7	7.6	0.089527	-0.127038	0.21656
YDR276C	PMP3	11.1	11.5	9.4	9.6	0.414908	0.198365	0.21654
YNL113W	RPC19	9.3	9.5	8.3	8.3	0.241325	0.024851	0.21647
YGL228W	SHE10	9.9	9.9	9.8	9.6	0.049817	-0.166586	0.2164
YJL014W	CCT3	10.7	10.8	10.4	10.3	0.037431	-0.178712	0.21614
YPL229W		7	7.2	5.8	5.8	0.181605	-0.034453	0.21606
YDR363W-A	SEM1	8.6	8.8	7.6	7.6	0.247819	0.031821	0.216
YPL148C	PPT2	3.6	5.2	4.7	6.1	1.61024	1.39428	0.21597
YDR229W	IVY1	7.9	8.1	7.7	7.7	0.237077	0.021176	0.2159
YDR525W-A	SNA2	8.8	9.4	7.5	7.8	0.544933	0.329356	0.21558
YPL038W	MET31	6.1	5.9	6.5	6.1	-0.149314	-0.364783	0.21547
YER020W	GPA2	8	8.2	8	8	0.194884	-0.020508	0.21539
YGL223C	COG1	7.6	7.9	7.9	7.9	0.236491	0.021506	0.21499
YBR171W	SEC66	8.8	8.9	8	7.9	0.140199	-0.074752	0.21495
YDL014W	NOP1	11.9	12.2	11.1	11.2	0.304265	0.089331	0.21493
YPL127C	HHO1	9.9	10	8.8	8.8	0.170217	-0.044635	0.21485
YLR170C	APS1	7.8	8.1	7.2	7.3	0.295413	0.081412	0.214
YFL045C	SEC53	12.5	12.8	11.5	11.6	0.303864	0.090543	0.21332
YOR059C		4.7	4.8	7.2	7.1	0.126665	-0.086588	0.21325
YAL046C	AIM1	7.6	7.9	7.4	7.5	0.329517	0.116724	0.21279
YDR207C	UME6	8	7.9	8.2	8	-0.04048	-0.253151	0.21267
YIL019W	FAF1	7.2	7.1	6.8	6.5	-0.018989	-0.231223	0.21223
YDR100W	TVP15	9	9.3	8.1	8.2	0.313797	0.101588	0.21221
YIL004C	BET1	7.3	7.5	6.9	6.9	0.20494	-0.006966	0.21191
YDL012C		9	9.2	7.5	7.5	0.215304	0.003467	0.21184
YNL224C	SQS1	8	7.9	8.2	7.9	-0.038082	-0.249698	0.21162
YBR030W	RKM3	6.4	6.8	7.8	8	0.383267	0.172236	0.21103
YPR105C	COG4	7.9	7.8	9.3	8.9	-0.156848	-0.367744	0.2109
YDR492W	IZH1	8.7	8.6	8.5	8.1	-0.142817	-0.352919	0.2101
YOR054C	VHS3	8.3	8.5	8.3	8.3	0.211106	0.001478	0.20963
YBR238C		8.5	8.4	8.8	8.5	-0.127797	-0.337353	0.20956
YKR026C	GCN3	8.9	8.9	8.6	8.4	0.042832	-0.166711	0.20954
YHR057C	CPR2	7.7	8	7.7	7.8	0.21931	0.010124	0.20919
YHR006W	STP2	8.9	9.2	8.8	8.8	0.268482	0.059523	0.20896
YNL302C	RPS19B	14	14.3	12.8	12.8	0.268296	0.059515	0.20878
YDR409W	SIZ1	7.1	6.9	8.3	7.9	-0.249283	-0.457733	0.20845
YDR027C	VPS54	7.4	7.5	8.6	8.4	0.01776	-0.190303	0.20806
YOL078W	AVO1	7.3	7.3	8.5	8.3	0.029174	-0.178647	0.20782
YDR520C	URC2	6.5	6.6	7.6	7.5	0.120948	-0.086754	0.2077
YMR253C		7.6	7.9	7.7	7.8	0.3251	0.117918	0.20718
YCR097W	HMRA1	7.6	7.9	7.7	7.8	0.274468	0.06732	0.20715
YOL056W	GPM3	6.9	6.9	6.4	6.2	-0.023132	-0.230044	0.20691
YJL006C	CTK2	7.1	7.5	6.6	6.9	0.436399	0.229743	0.20666
YLR328W	NMA1	8	8.2	8.5	8.6	0.230122	0.023661	0.20646
YJL125C	GCD14	7.8	8	7.7	7.6	0.163275	-0.043089	0.20636
YNL035C		8.2	8.2	8.3	8.1	0.017063	-0.189127	0.20619
YNL325C	FIG4	6.7	6.7	7.6	7.3	-0.020894	-0.226744	0.20585
YOR131C		8.2	8.4	7.7	7.7	0.20796	0.002131	0.20583
YFL005W	SEC4	10.3	10.3	9.4	9.2	-0.020559	-0.226278	0.20572
YLR002C	NOC3	9.1	9.1	9	8.8	0.061201	-0.144511	0.20571
YJL199C	MBB1	5.3	5.8	5	5.3	0.471607	0.26633	0.20528
YDR403W	DIT1	4.9	4.2	5.8	4.9	-0.720887	-0.92614	0.20525
YPR026W	ATH1	7.3	7.3	8.7	8.5	0.006089	-0.199127	0.20522
YIR033W	MGA2	8.6	8.4	9.7	9.3	-0.117936	-0.322811	0.20488
YPL051W	ARL3	6.2	6.4	5.9	5.9	0.270135	0.065442	0.20469
YFL030W	AGX1	4.9	6.1	6	7	1.1821	0.978054	0.20404
YGR128C	UTP8	9.2	9.1	9.5	9.2	-0.088582	-0.29241	0.20383
YNL314W	DAL82	5.9	5.9	6.6	6.4	0.031338	-0.172479	0.20382
YBR105C	VID24	6.8	7.2	7.3	7.5	0.417043	0.213385	0.20366
YBR056W		9.6	9.6	9.7	9.5	0.054869	-0.148779	0.20365
YJL060W	BNA3	9.1	9	9	8.6	-0.12387	-0.327463	0.20359
YDR169C	STB3	7.7	8	8	8.1	0.307961	0.10469	0.20327
YDR064W	RPS13	14.4	14.8	13.3	13.4	0.324308	0.121255	0.20305
YOR025W	HST3	8.5	8.6	9.1	9.1	0.165778	-0.036718	0.2025
YPL118W	MRP51	8.8	9.1	8.6	8.8	0.330913	0.129294	0.20162
YGL003C	CDH1	7	6.9	7.7	7.4	-0.096889	-0.298502	0.20161
YDR320C	SWA2	8.7	9	8.5	8.6	0.289456	0.087884	0.20157
YKL009W	MRT4	9.6	9.8	8.8	8.8	0.195211	-0.006268	0.20148
YDL146W	LDB17	5.5	5.9	6.9	7.1	0.43429	0.232866	0.20142
YBR155W	CNS1	8.2	8.1	7.8	7.6	-0.0642	-0.265345	0.20114
YGR092W	DBF2	9.4	9.4	9.4	9.2	0.023161	-0.17772	0.20088
YDL237W	AIM6	9	9	9.1	8.9	-0.009767	-0.210275	0.20051
YML015C	TAF11	7.3	7.5	7.4	7.4	0.196485	-0.003626	0.20011
YJL065C	DLS1	7.6	8.1	7.7	8.1	0.552422	0.352828	0.19959
YBR167C	POP7	6.1	6.2	5.8	5.7	0.126553	-0.072934	0.19949
YMR302C	YME2	8.6	8.5	9.4	9.2	-0.079624	-0.278904	0.19928
YNL200C		8.6	8.9	8	8.1	0.286327	0.087088	0.19924
YJL136C	RPS21B	13.1	13.4	11.8	11.9	0.315801	0.11666	0.19914
YDR494W	RSM28	7.7	8	7.6	7.7	0.273644	0.074515	0.19913
YLR301W		11.3	11.3	10.1	10	0.024624	-0.174467	0.19909
YMR280C	CAT8	6.1	5.9	6.9	6.5	-0.264074	-0.462857	0.19878
YKL142W	MRP8	10.2	10.5	9.2	9.2	0.281107	0.082547	0.19856
YHR162W		11.3	11.5	10.7	10.7	0.18967	-0.008824	0.19849
YLR242C	ARV1	5.6	6	6.5	6.7	0.385115	0.186743	0.19837
YNL070W	TOM7	9.1	9.5	7.5	7.7	0.338159	0.139859	0.1983
YGL044C	RNA15	8.2	8.4	7.2	7.3	0.223018	0.024789	0.19823
YER130C		7.6	7.6	8.2	8	0.026419	-0.171794	0.19821
YFL001W	DEG1	7	7.2	7.5	7.5	0.184263	-0.013888	0.19815
YKL014C	URB1	9.8	9.7	10.8	10.5	-0.098947	-0.296843	0.1979
YDL076C	RXT3	7	7.2	7.2	7.2	0.207987	0.010678	0.19731
YLR272C	YCS4	7.7	7.7	8.9	8.8	0.029957	-0.167269	0.19723
YFL042C		8	7.8	8.4	8	-0.187149	-0.383702	0.19655
YGR267C	FOL2	9.4	9.6	9.2	9.1	0.15806	-0.038353	0.19641
YBL016W	FUS3	8	7.8	8	7.6	-0.134617	-0.330905	0.19629
YOL121C	RPS19A	13.9	14.2	12.5	12.7	0.340348	0.1443	0.19605
YDL108W	KIN28	7	7.1	7	6.9	0.10856	-0.087471	0.19603
YHR149C	SKG6	8.2	8	8.8	8.4	-0.188454	-0.384436	0.19598
YMR298W	LIP1	9.4	9.4	8.2	8	-0.000152	-0.196015	0.19586
YPR055W	SEC8	8.3	8.2	8.9	8.7	-0.072797	-0.268576	0.19578
YEL021W	URA3	9.5	10.9	8.7	9.9	1.47245	1.27702	0.19542
YCR004C	YCP4	10.8	11.1	9.8	9.9	0.261337	0.065955	0.19538
YBR160W	CDC28	9.5	9.5	8.7	8.5	-0.008418	-0.203709	0.19529
YGR036C	CAX4	6.6	6.5	6.7	6.4	-0.129022	-0.324191	0.19517
YHR062C	RPP1	7.8	7.9	7.9	7.9	0.128424	-0.066737	0.19516
YKL065C	YET1	9.9	9.9	9.6	9.3	-0.082781	-0.277337	0.19456
YBR247C	ENP1	9	9	8.6	8.5	0.023101	-0.171194	0.1943
YER174C	GRX4	7.5	7.9	7.8	8	0.411155	0.217006	0.19415
YBR168W	PEX32	5.3	5.5	6.5	6.6	0.231589	0.03762	0.19397
YLR163C	MAS1	8.5	8.4	8.3	8.1	-0.030788	-0.224635	0.19385
YKL018C-A		6.7	7	6	6.1	0.317143	0.123485	0.19366
YGL171W	ROK1	8.9	8.9	8.5	8.3	0.066962	-0.126643	0.19361
YDL073W		6.6	6.7	8.7	8.6	0.082285	-0.111264	0.19355
YDL101C	DUN1	8.1	8.3	8.3	8.3	0.19944	0.006026	0.19341
YFR050C	PRE4	10.2	10.4	9.7	9.7	0.169726	-0.023101	0.19283
YFL027C	GYP8	5.9	6.3	7.2	7.4	0.401714	0.209145	0.19257
YDR056C		8.6	8.6	8.2	8.1	0.011229	-0.181265	0.19249
YLR006C	SSK1	7.3	7.3	8.4	8.2	-0.030075	-0.222103	0.19203
YGR231C	PHB2	9.9	10	9.8	9.7	0.120543	-0.071199	0.19174
YDL078C	MDH3	10.3	10.6	9.6	9.8	0.307883	0.11642	0.19146
YIL110W	HPM1	7.9	7.9	7.9	7.8	0.025811	-0.165355	0.19117
YOR160W	MTR10	8.6	8.7	9.1	9.1	0.104247	-0.086835	0.19108
YKR076W	ECM4	7.1	7.3	7.3	7.3	0.149239	-0.041747	0.19099
YOL041C	NOP12	9.6	9.7	8.7	8.7	0.141149	-0.049776	0.19093
YJL166W	QCR8	9.6	10.1	8.6	8.9	0.454548	0.263685	0.19086
YDL059C	RAD59	4.9	5.2	5.4	5.6	0.342897	0.152077	0.19082
YGL125W	MET13	11.2	11.5	11.2	11.4	0.371696	0.18089	0.19081
YOR303W	CPA1	11.3	11.9	11.2	11.7	0.659909	0.469199	0.19071
YNL048W	ALG11	7.8	7.8	8.4	8.2	0.037107	-0.153466	0.19057
YDL192W	ARF1	12.1	12.4	11.5	11.6	0.305896	0.115385	0.19051
YDR405W	MRP20	8.2	8.6	7.4	7.6	0.351033	0.160549	0.19048
YPR068C	HOS1	5.1	5.1	6.2	6	-0.030534	-0.220382	0.18985
YNL164C	IBD2	6.8	7	6.7	6.6	0.135704	-0.053868	0.18957
YLR390W	ECM19	7.5	8	6.6	7	0.549536	0.360041	0.18949
YNL111C	CYB5	8.9	8.9	7.9	7.7	0.030954	-0.158446	0.1894
YFL014W	HSP12	12.6	14	10.9	12.1	1.40485	1.21575	0.1891
YOL028C	YAP7	6.9	7.1	6.7	6.7	0.175509	-0.013533	0.18904
YDR211W	GCD6	9.9	9.8	10.2	10	-0.068836	-0.257836	0.189
YFR025C	HIS2	7.9	8.2	8.2	8.3	0.294553	0.105642	0.18891
YML029W	USA1	8	8	8.3	8.2	0.007623	-0.181237	0.18886
YHR080C		6.9	6.8	9.5	9.2	-0.072818	-0.26166	0.18884
YGR271W	SLH1	8.6	8.4	10.1	9.7	-0.159811	-0.348335	0.18852
YMR179W	SPT21	7.1	7	7.8	7.5	-0.107388	-0.295096	0.18771
YPL117C	IDI1	9.8	9.7	9	8.7	-0.062161	-0.249664	0.1875
YOR209C	NPT1	9.8	9.9	9.7	9.6	0.047359	-0.139867	0.18723
YER003C	PMI40	11.8	12	11	11	0.142817	-0.044216	0.18703
YLR438C-A	LSM3	8.7	9	7.3	7.5	0.294896	0.108018	0.18688
YNL061W	NOP2	10	10.1	10.2	10.1	0.14844	-0.038106	0.18655
YPL097W	MSY1	7.3	7.3	7.5	7.3	-0.012098	-0.198555	0.18646
YDL213C	NOP6	9	9.2	8.4	8.4	0.175451	-0.010816	0.18627
YER060W	FCY21	6.3	6.1	7.8	7.5	-0.165396	-0.350859	0.18546
YML032C	RAD52	7.6	7.9	7.8	8	0.314907	0.129555	0.18535
YOR130C	ORT1	7.4	7.6	7.9	7.9	0.157876	-0.027436	0.18531
YNL016W	PUB1	12.2	12.3	11.3	11.3	0.158473	-0.026804	0.18528
YBR122C	MRPL36	7.9	8.3	7.4	7.6	0.343742	0.158617	0.18513
YGL142C	GPI10	7.7	7.7	8.4	8.3	0.017508	-0.166878	0.18439
YLR357W	RSC2	9.1	9.2	9	9	0.177948	-0.006393	0.18434
YBL066C	SEF1	7.1	7.3	9	8.9	0.164194	-0.020093	0.18429
YGR132C	PHB1	9.9	10.1	9.8	9.8	0.216184	0.031989	0.18419
YGR134W	CAF130	6.9	6.9	8.4	8.3	0.066984	-0.117006	0.18399
YPL215W	CBP3	8.3	8.5	8.1	8.1	0.243063	0.059726	0.18334
YGR181W	TIM13	8.8	8.9	7.9	7.9	0.126886	-0.056396	0.18328
YBR066C	NRG2	6.3	6.1	6.6	6.2	-0.230823	-0.413693	0.18287
YLR448W	RPL6B	13.5	13.8	12.7	12.8	0.314278	0.131467	0.18281
YOR022C		6.8	6.8	7.1	6.9	-0.052072	-0.234189	0.18212
YIL114C	POR2	7.1	7	7.5	7.3	-0.056386	-0.238458	0.18207
YAR007C	RFA1	9.7	9.8	9.1	8.9	0.043086	-0.138869	0.18195
YCR032W	BPH1	6.8	6.6	9.3	8.9	-0.233432	-0.415357	0.18193
YML106W	URA5	11.1	11.3	10.7	10.7	0.21922	0.037469	0.18175
YHR038W	RRF1	7	7.5	6	6.3	0.451883	0.270563	0.18132
YOR231W	MKK1	7.2	7.3	8.2	8.1	0.114343	-0.066564	0.18091
YIL074C	SER33	9.2	9.2	8.9	8.7	-0.024631	-0.205483	0.18085
YHR090C	YNG2	6.8	7.3	6.7	6.9	0.425186	0.244357	0.18083
YJR102C	VPS25	6.5	6.5	6.2	6.1	0.042686	-0.138036	0.18072
YOL039W	RPP2A	13.8	14.2	12.5	12.7	0.355291	0.174731	0.18056
YNR075W	COS10	6	6.3	6.9	7.1	0.313563	0.133045	0.18052
YOR196C	LIP5	7.8	8	8.3	8.3	0.224597	0.044157	0.18044
YGL094C	PAN2	7	7	9.3	9.1	0.022528	-0.157735	0.18026
YOR350C	MNE1	6.4	6.4	7.6	7.5	0.040956	-0.139178	0.18013
YMR263W	SAP30	7.8	7.8	6.7	6.6	0.058654	-0.121039	0.17969
YGR229C	SMI1	9.6	9.7	9.7	9.6	0.115882	-0.063686	0.17957
YNL287W	SEC21	11.5	11.6	11.7	11.5	0.052344	-0.127129	0.17947
YOR286W	RDL2	9	9.4	8	8.3	0.402502	0.223036	0.17947
YPL135W	ISU1	9.6	10	8.8	9.1	0.411645	0.232345	0.1793
YKL062W	MSN4	9.8	10	9.4	9.4	0.193706	0.015142	0.17856
YDR506C		6.9	6.8	7.2	6.9	-0.110958	-0.289437	0.17848
YNL326C	PFA3	6.8	6.8	7.2	7.1	0.050772	-0.12732	0.17809
YKL121W	DGR2	6.5	6.3	8	7.7	-0.158324	-0.335738	0.17741
YPL204W	HRR25	9.4	9.6	9.5	9.5	0.18858	0.011204	0.17738
YHR043C	DOG2	9.2	9.3	8.5	8.5	0.190524	0.013403	0.17712
YLR375W	STP3	7.7	8.4	8.7	9.2	0.692882	0.515842	0.17704
YJL101C	GSH1	7.6	7.7	8.8	8.7	0.027563	-0.149363	0.17693
YDR328C	SKP1	10.2	10.4	9	9.1	0.221679	0.044915	0.17676
YBR087W	RFC5	8.3	8.6	8.3	8.5	0.351412	0.1748	0.17661
YHR051W	COX6	10.3	10.8	9.2	9.5	0.509613	0.333138	0.17647
YDR153C	ENT5	9.3	9.5	8.4	8.4	0.17662	0.000172	0.17645
YOR144C	ELG1	6.5	6.5	7.7	7.5	-0.091456	-0.267863	0.17641
YPR098C		8.7	9	7.9	8	0.304172	0.127881	0.17629
YEL051W	VMA8	10.6	10.7	10.4	10.3	0.10959	-0.066381	0.17597
YNL027W	CRZ1	8.4	8.6	8.1	8.2	0.224591	0.04882	0.17577
YPL177C	CUP9	8.8	9.3	8.4	8.7	0.535078	0.359466	0.17561
YJR130C	STR2	7.6	7.9	8.6	8.6	0.230267	0.054689	0.17558
YGL242C		9.3	9.5	8.4	8.4	0.208293	0.032803	0.17549
YGL048C	RPT6	10.3	10.5	10.1	10.1	0.17704	0.002342	0.1747
YAL032C	PRP45	7	7.3	7	7.1	0.279372	0.104786	0.17459
YIL041W	GVP36	11.7	12	10.8	10.9	0.270455	0.096557	0.1739
YEL037C	RAD23	11.1	11.2	9.8	9.8	0.106001	-0.067744	0.17375
YLR026C	SED5	8.3	8.4	7.5	7.5	0.134071	-0.039396	0.17347
YMR143W	RPS16A	13.2	13.5	12.2	12.4	0.330048	0.156647	0.1734
YBR256C	RIB5	9.8	10.1	10.1	10.1	0.23874	0.066162	0.17258
YDL164C	CDC9	8.6	8.5	8.9	8.6	-0.15813	-0.330439	0.17231
YJR034W	PET191	7.7	8.1	6.2	6.4	0.39186	0.219553	0.17231
YOR205C	GEP3	6.2	6.2	7.8	7.6	0.001853	-0.170359	0.17221
YKL166C	TPK3	8	7.9	7.9	7.6	-0.10771	-0.2799	0.17219
YKR099W	BAS1	7.5	7.7	8.4	8.4	0.168152	-0.003934	0.17209
YLR407W		7.4	7.4	7	6.8	0.011512	-0.16028	0.17179
YHR045W		8.2	8.2	8.6	8.4	0.021659	-0.150019	0.17168
YGL110C	CUE3	7.6	7.8	7.8	7.8	0.181778	0.01027	0.17151
YBR257W	POP4	6.9	7	6.3	6.2	0.146803	-0.024594	0.1714
YBR210W	ERV15	6.5	6.7	6.5	6.5	0.229582	0.058267	0.17131
YOR035C	SHE4	8.1	8.1	8.8	8.6	0.008054	-0.16309	0.17114
YBL038W	MRPL16	8.1	8.2	7.6	7.5	0.100777	-0.070171	0.17095
YDR130C	FIN1	7	7.2	6.6	6.7	0.234863	0.063963	0.1709
YLR312W-A	MRPL15	7.8	8	7.3	7.3	0.172934	0.002143	0.17079
YGR008C	STF2	10	10.3	8.1	8.3	0.322534	0.151983	0.17055
YAL028W	FRT2	5.1	5.3	6.5	6.6	0.195351	0.024823	0.17053
YHR158C	KEL1	9	8.7	9.1	8.7	-0.298339	-0.468869	0.17053
YDR531W	CAB1	7.8	7.8	8.2	8.1	-0.006713	-0.177225	0.17051
YPL213W	LEA1	7.1	7.4	6.4	6.5	0.333407	0.162988	0.17042
YHR144C	DCD1	6.8	7	7.3	7.3	0.17655	0.006393	0.17016
YLR430W	SEN1	9.5	9.3	11	10.6	-0.24315	-0.413261	0.17011
YOL094C	RFC4	8.4	8.4	7.9	7.7	-0.018026	-0.188087	0.17006
YER048W-A	ISD11	8.7	8.8	8	7.9	0.07082	-0.099216	0.17004
YNL083W	SAL1	6.3	6.1	7.2	6.8	-0.18435	-0.354211	0.16986
YKR091W	SRL3	8.8	9.1	8.1	8.2	0.286712	0.116988	0.16972
YMR005W	TAF4	8.4	8.6	8.2	8.3	0.25569	0.086026	0.16966
YBR153W	RIB7	6.1	6.6	6.7	7	0.444813	0.275446	0.16937
YPL075W	GCR1	6.7	6.8	9	8.8	0.050574	-0.118673	0.16925
YJL112W	MDV1	7	7.4	8.3	8.5	0.395547	0.226311	0.16924
YLR021W	IRC25	6.4	7	6.6	7	0.572107	0.402907	0.1692
YBR015C	MNN2	10.4	10.3	10.5	10.2	-0.038356	-0.20752	0.16916
YLR119W	SRN2	6.2	6.5	5.4	5.6	0.352302	0.183271	0.16903
YDR197W	CBS2	6.4	6.5	7.5	7.4	0.09644	-0.072458	0.1689
YMR061W	RNA14	8.2	8.3	8.6	8.6	0.165345	-0.003546	0.16889
YDL030W	PRP9	6.5	6.6	7.1	7	0.150364	-0.01816	0.16852
YKL207W	AIM27	9.5	9.7	9.3	9.3	0.190618	0.02236	0.16826
YLR068W	FYV7	6.3	6.7	5.3	5.6	0.392297	0.224046	0.16825
YLR287C-A	RPS30A	12.9	13	11.9	11.8	0.107731	-0.060295	0.16803
YPL219W	PCL8	7	7.2	7.3	7.3	0.187224	0.019373	0.16785
YBR255W	MTC4	6.3	6.2	7.8	7.5	-0.072243	-0.240068	0.16782
YLR192C	HCR1	10.8	11.1	9.9	10.1	0.290643	0.123249	0.16739
YLR088W	GAA1	8.6	8.4	8.7	8.4	-0.159967	-0.327147	0.16718
YDL102W	POL3	9	8.9	9.2	8.9	-0.092748	-0.2597	0.16695
YNL231C	PDR16	9.6	9.8	9	9	0.156141	-0.010199	0.16634
YLL043W	FPS1	8.8	8.8	9.3	9.2	0.076201	-0.08991	0.16611
YHL025W	SNF6	8.2	8.6	8.6	8.7	0.349624	0.18368	0.16594
YJL029C	VPS53	8.4	8.5	9	8.9	0.053817	-0.11198	0.1658
YPL159C	PET20	7.6	7.9	6.9	7	0.3097	0.144196	0.1655
YKR029C	SET3	7.9	8	8.1	8	0.125571	-0.039712	0.16528
YGL054C	ERV14	9.9	10.2	9.2	9.3	0.265333	0.100103	0.16523
YJL041W	NSP1	11.1	11.2	10.8	10.7	0.078137	-0.086899	0.16504
YDR529C	QCR7	10.8	11.5	9.3	9.9	0.668911	0.504023	0.16489
YER171W	RAD3	7.9	7.9	8.8	8.6	-0.013718	-0.17859	0.16487
YBL003C	HTA2	11.3	11.7	10.3	10.5	0.386838	0.221988	0.16485
YHL002W	HSE1	8.6	8.8	8.1	8.2	0.258878	0.094032	0.16485
YOL006C	TOP1	9	9.1	8.9	8.9	0.103917	-0.06056	0.16448
YLL014W	EMC6	8.6	8.6	7.8	7.7	0.032565	-0.131827	0.16439
YGL050W	TYW3	7	6.8	7.2	6.8	-0.237799	-0.402049	0.16425
YDL031W	DBP10	9.6	9.7	9.8	9.7	0.117315	-0.046763	0.16408
YDL168W	SFA1	10.4	10.6	9.5	9.6	0.19962	0.035765	0.16386
YPL161C	BEM4	7.3	7.3	7.7	7.5	-0.030805	-0.194435	0.16363
YML034W	SRC1	9.2	9.2	9.1	9	0.059221	-0.104374	0.16359
YNL161W	CBK1	9.1	9	9.2	8.9	-0.086761	-0.250246	0.16348
YPL248C	GAL4	4.7	4.4	6.1	5.7	-0.260393	-0.423565	0.16317
YBL020W	RFT1	8	8	8.7	8.6	0.024953	-0.138042	0.163
YLR225C		8.6	8.6	8.3	8.1	0.025781	-0.137169	0.16295
YGR079W		8	7.9	7.3	7.1	-0.023488	-0.186289	0.1628
YER032W	FIR1	7.8	7.6	8.3	8	-0.119995	-0.282348	0.16235
YGR071C		6.2	6.6	7.7	7.8	0.352158	0.18983	0.16233
YLR189C	ATG26	7.6	8.1	9.3	9.6	0.450844	0.288705	0.16214
YBR109C	CMD1	11.7	12	10.4	10.6	0.329578	0.167489	0.16209
YMR029C	FAR8	8	8.2	8.1	8.2	0.192926	0.030833	0.16209
YOR307C	SLY41	7.6	7.7	8.5	8.4	0.076549	-0.08538	0.16193
YGL236C	MTO1	7	7	8	7.8	-0.018642	-0.180442	0.1618
YDR314C	RAD34	4.7	4.7	7.6	7.4	-0.005698	-0.16737	0.16167
YJL187C	SWE1	6.4	6.4	8.4	8.2	-0.022639	-0.184222	0.16158
YOR007C	SGT2	12	12.2	11.3	11.3	0.144056	-0.01751	0.16157
YPL249C	GYP5	9.1	9	8.8	8.5	-0.077842	-0.239357	0.16152
YER172C	BRR2	9.2	9	10.7	10.3	-0.176845	-0.338353	0.16151
YPL082C	MOT1	8.9	8.9	10.8	10.6	-0.021668	-0.183014	0.16135
YOR066W	MSA1	9	8.7	9.2	8.7	-0.336468	-0.497665	0.1612
YIR019C	MUC1	3.2	2.9	9.2	8.7	-0.322798	-0.48359	0.16079
YLR259C	HSP60	13.7	13.9	12.8	12.9	0.205229	0.044708	0.16052
YOR084W	LPX1	5	5.3	7.7	7.8	0.30808	0.147607	0.16047
YGL107C	RMD9	7.9	7.7	8.5	8.2	-0.128368	-0.28858	0.16021
YCR035C	RRP43	8.1	8.1	7.9	7.7	0.047492	-0.112634	0.16013
YMR153W	NUP53	8.9	8.9	8.2	8.1	0.032611	-0.127475	0.16009
YLR086W	SMC4	8.7	8.6	9.5	9.3	-0.066292	-0.22631	0.16002
YPL190C	NAB3	10.4	10.4	9.9	9.8	0.019322	-0.140496	0.15982
YOR278W	HEM4	7.2	7.4	7	7	0.206185	0.046438	0.15975
YDR475C	JIP4	7	6.8	8.7	8.3	-0.265045	-0.424754	0.15971
YPL106C	SSE1	14.3	14.4	13.5	13.4	0.096079	-0.063375	0.15945
YPR016C	TIF6	10.1	10.4	9.6	9.7	0.279026	0.119763	0.15926
YIR035C		9.8	10.3	9.3	9.7	0.549228	0.390162	0.15907
YPR132W	RPS23B	14.1	14.4	13.1	13.2	0.329573	0.17063	0.15894
YER001W	MNN1	9.8	9.6	9.8	9.6	-0.119239	-0.278158	0.15892
YPR086W	SUA7	8.8	9.1	8.9	9.1	0.297452	0.138733	0.15872
YDR239C		7.9	7.8	8.2	7.9	-0.119479	-0.277518	0.15804
YPL004C	LSP1	11.9	12.2	11	11.1	0.329388	0.171344	0.15804
YLR066W	SPC3	8.8	8.9	8.6	8.5	0.057474	-0.100521	0.15799
YDR164C	SEC1	7.8	7.8	8.3	8.1	-0.022558	-0.180504	0.15795
YOR152C		6.8	6.9	6.4	6.4	0.144327	-0.013375	0.1577
YOR223W		7.6	7.7	6.7	6.6	0.068035	-0.08937	0.1574
YMR092C	AIP1	10.9	10.7	10.6	10.2	-0.225407	-0.382392	0.15699
YDR103W	STE5	8.2	8.1	8.9	8.7	-0.090787	-0.2477	0.15691
YNR069C	BSC5	3.9	3.4	7.1	6.5	-0.453921	-0.610744	0.15682
YGL013C	PDR1	8.2	8.2	9.4	9.2	-0.015792	-0.171958	0.15617
YMR027W		9.9	10	9.7	9.6	0.090309	-0.065715	0.15602
YGR166W	KRE11	6.9	6.8	8.4	8.1	-0.125344	-0.281221	0.15588
YGR063C	SPT4	8.1	8.6	7.6	7.9	0.450393	0.294807	0.15559
YPL270W	MDL2	8.7	8.6	9.8	9.5	-0.072875	-0.228407	0.15553
YLR314C	CDC3	10.6	10.6	10	9.9	0.055493	-0.100015	0.15551
YCL055W	KAR4	7.6	7.9	6.7	6.8	0.295558	0.140098	0.15546
YHR108W	GGA2	10.8	10.9	10.5	10.5	0.14258	-0.012757	0.15534
YDL080C	THI3	6.2	6.5	7.7	7.9	0.325911	0.170588	0.15532
YBL009W	ALK2	8	7.9	8.4	8.2	-0.07467	-0.229976	0.15531
YER024W	YAT2	6.9	6.1	8.3	7.3	-0.860276	-1.01547	0.15519
YKL149C	DBR1	6.2	6.2	6.7	6.5	-0.073324	-0.228441	0.15512
YPL101W	ELP4	8	8.4	8	8.1	0.324363	0.169414	0.15495
YBL080C	PET112	6.8	6.5	7	6.6	-0.291298	-0.446241	0.15494
YPL230W	USV1	6.4	7	7.1	7.5	0.551162	0.39639	0.15477
YDR425W	SNX41	7.1	7	7.4	7.2	-0.048784	-0.203294	0.15451
YBL004W	UTP20	10.4	10.3	11.8	11.6	-0.086263	-0.240747	0.15448
YKL040C	NFU1	8.7	9	8.3	8.4	0.290817	0.136396	0.15442
YER050C	RSM18	8.1	8.1	6.9	6.8	0.076515	-0.077859	0.15437
YGR237C		8	7.9	8.4	8.3	-0.017401	-0.171748	0.15435
YKL150W	MCR1	10.6	10.8	9.7	9.7	0.212242	0.058682	0.15356
YLR011W	LOT6	6.4	6.6	6	6	0.170879	0.017481	0.1534
YLR333C	RPS25B	12.3	12.5	11.7	11.7	0.199851	0.04658	0.15327
YJL039C	NUP192	10	9.9	11	10.7	-0.19022	-0.343315	0.1531
YML112W	CTK3	7.4	7.6	6.7	6.7	0.149038	-0.004013	0.15305
YDL234C	GYP7	8.5	8.6	8.6	8.6	0.100762	-0.052098	0.15286
YBR126C	TPS1	12.3	12.3	11.3	11.1	0.000402	-0.152198	0.1526
YOR239W	ABP140	10	10.1	9.6	9.6	0.162395	0.00985	0.15254
YGL226C-A	OST5	8.5	8.6	7.8	7.7	0.087638	-0.064872	0.15251
YLR087C	CSF1	7.1	6.9	10.5	10.1	-0.271526	-0.423934	0.15241
YPL256C	CLN2	9.5	9.2	9.7	9.3	-0.266259	-0.418642	0.15238
YLR298C	YHC1	7.1	7.2	6.6	6.5	0.05894	-0.093185	0.15212
YNL263C	YIF1	9.8	10	8.8	8.8	0.130343	-0.021657	0.152
YLL022C	HIF1	8.1	8.4	7.7	7.8	0.233829	0.082016	0.15181
YAL056W	GPB2	6.9	6.9	9	8.8	-0.03839	-0.189937	0.15155
YPR108W	RPN7	10.3	10.3	10.1	10	0.024687	-0.126675	0.15136
YCR088W	ABP1	12.8	12.8	11.3	11.1	0.03515	-0.115948	0.1511
YML081C-A	ATP18	9.5	10.1	8.1	8.5	0.626716	0.475635	0.15108
YCR093W	CDC39	10.9	10.8	11.8	11.6	-0.105125	-0.256134	0.15101
YER076C		4.7	5.3	6	6.3	0.532746	0.381734	0.15101
YLR354C	TAL1	12.7	12.8	11.9	11.9	0.090316	-0.060632	0.15095
YBR262C	AIM5	7.2	7.6	6.8	7	0.341636	0.190842	0.15079
YPL220W	RPL1A	15	15.3	14.2	14.4	0.31131	0.160922	0.15039
YGR247W	CPD1	7	7	6.8	6.7	0.055395	-0.094743	0.15014
YMR016C	SOK2	8.2	8.1	8.7	8.5	-0.032649	-0.182724	0.15007
YBR091C	TIM12	7.4	8	6.4	6.8	0.545062	0.395051	0.15001
YDR365C	ESF1	9.2	9.3	9.2	9.1	0.067565	-0.082344	0.14991
YDR470C	UGO1	7.2	7.3	7.4	7.4	0.074667	-0.075188	0.14985
YAR003W	SWD1	7.4	7.4	8	7.9	0.079691	-0.069827	0.14952
YLR421C	RPN13	9.6	9.9	8.4	8.5	0.313668	0.164453	0.14922
YNL135C	FPR1	12.3	12.6	11	11.2	0.348526	0.199496	0.14903
YNL238W	KEX2	8.3	8.2	9.6	9.3	-0.105258	-0.254196	0.14894
YFR049W	YMR31	8.8	9.2	8	8.2	0.403302	0.254573	0.14873
YDR118W	APC4	6.5	6.6	7.2	7.1	0.075639	-0.072926	0.14856
YPR010C-A		8.4	8.9	6.8	7.2	0.495617	0.347435	0.14818
YDL226C	GCS1	10.3	10.6	9.7	9.9	0.313104	0.165335	0.14777
YOR309C		7.8	8.2	8.4	8.6	0.391892	0.244163	0.14773
YPL255W	BBP1	5.9	5.7	6.9	6.6	-0.107446	-0.255135	0.14769
YJR025C	BNA1	10.4	10.5	9.5	9.5	0.102252	-0.045408	0.14766
YHR133C	NSG1	8.9	8.9	8.7	8.6	0.043682	-0.10393	0.14761
YDL177C		4.8	4.7	6.1	5.8	-0.144241	-0.291364	0.14712
YOR034C	AKR2	7.1	7.1	8.4	8.3	0.031442	-0.115357	0.1468
YFL041W	FET5	9	9	8.9	8.8	-0.020391	-0.166909	0.14652
YLR405W	DUS4	6.5	6.7	7.4	7.4	0.167888	0.021394	0.14649
YMR072W	ABF2	10.8	11	9.5	9.5	0.191591	0.045179	0.14641
YLR199C	PBA1	8.1	8.2	7.7	7.8	0.192847	0.046517	0.14633
YJR031C	GEA1	8.6	8.5	9.7	9.5	-0.098947	-0.245254	0.14631
YPR072W	NOT5	9.5	9.5	9.1	8.9	-0.052966	-0.199138	0.14617
YER053C	PIC2	8.4	8.6	8.7	8.7	0.197396	0.051569	0.14583
YPL110C	GDE1	9.3	9.4	9.7	9.6	0.076147	-0.069589	0.14574
YHL013C	OTU2	7.5	7.7	6.6	6.6	0.173941	0.028327	0.14561
YPR089W		8.6	8.6	9.2	9	-0.002905	-0.148427	0.14552
YGR285C	ZUO1	13.2	13.4	12.1	12.2	0.172526	0.027134	0.14539
YNR053C	NOG2	9.8	10	9.9	9.9	0.192775	0.047495	0.14528
YLL007C		7	7.2	7.3	7.4	0.219388	0.074209	0.14518
YPR154W	PIN3	9.4	9.6	8.2	8.3	0.219735	0.074583	0.14515
YOL146W	PSF3	7.3	7.4	6.8	6.8	0.138209	-0.006326	0.14453
YPL032C	SVL3	9.5	9.6	10.1	10.1	0.076906	-0.06729	0.1442
YMR020W	FMS1	6.7	6.5	7.8	7.5	-0.176018	-0.320038	0.14402
YKL094W	YJU3	8.8	9.1	8.8	8.9	0.315331	0.171415	0.14392
YCR052W	RSC6	9.1	9.3	9.2	9.2	0.171826	0.027912	0.14391
YDR006C	SOK1	8.5	8.4	9.2	9	-0.088783	-0.232623	0.14384
YAL034C	FUN19	6.1	6.4	7.4	7.5	0.23615	0.0928	0.14335
YML073C	RPL6A	13.8	14.1	13	13.2	0.308439	0.165422	0.14302
YPL085W	SEC16	11.2	11	11.6	11.3	-0.130442	-0.273251	0.14281
YLR420W	URA4	10.4	11.3	10	10.8	0.913392	0.770677	0.14271
YDL090C	RAM1	7.1	7	7.6	7.3	-0.126604	-0.269139	0.14253
YNL116W	DMA2	8.4	8.4	8.3	8.2	0.015797	-0.12657	0.14237
YOR027W	STI1	13.1	12.9	11.8	11.5	-0.170603	-0.312961	0.14236
YLR089C	ALT1	10.4	10.4	10.4	10.3	0.07226	-0.069611	0.14187
YKR056W	TRM2	8.9	9	8.7	8.6	0.082359	-0.059319	0.14168
YLL035W	GRC3	7.2	7	8.1	7.8	-0.111778	-0.253416	0.14164
YBR061C	TRM7	8.6	8.9	7.8	8	0.272124	0.130549	0.14158
YDR449C	UTP6	8.3	8.2	8.1	7.9	-0.081912	-0.223345	0.14143
YPL218W	SAR1	10.8	11	10.2	10.3	0.208954	0.068043	0.14091
YGL063W	PUS2	5	5.1	6.8	6.7	0.073196	-0.067546	0.14074
YLR016C	PML1	6.2	6.6	6.4	6.8	0.454095	0.31335	0.14074
YOL115W	PAP2	7.6	7.8	8.3	8.4	0.244896	0.104463	0.14043
YFR047C	BNA6	9.7	10	9	9.2	0.347729	0.207311	0.14042
YGL083W	SCY1	6.8	7	8	8.1	0.20439	0.063974	0.14042
YLR439W	MRPL4	8.4	8.5	7.9	7.9	0.181676	0.041393	0.14028
YNL106C	INP52	7.4	7.3	8.7	8.5	-0.091836	-0.231849	0.14001
YLR319C	BUD6	7.7	8	7.9	8	0.295666	0.155662	0.14
YOL003C	PFA4	6.8	6.8	7.2	7.1	0.020348	-0.119483	0.13983
YML063W	RPS1B	14.3	14.6	13.9	14	0.270159	0.130343	0.13982
YBR213W	MET8	6.6	6.7	5.9	5.9	0.148866	0.009082	0.13978
YBR272C	HSM3	7.8	8	8.1	8.1	0.209645	0.069894	0.13975
YKR069W	MET1	4.6	4.5	7.1	6.7	-0.181964	-0.321578	0.13961
YJR042W	NUP85	8.5	8.7	9.3	9.3	0.156327	0.01678	0.13955
YDR530C	APA2	7.1	7.2	7.3	7.2	0.105298	-0.034229	0.13953
YBL055C		7.8	7.9	8.3	8.3	0.095376	-0.044116	0.13949
YGL058W	RAD6	9	9	8.1	8	0.003377	-0.13581	0.13919
YIL106W	MOB1	8.8	9	8.3	8.3	0.175518	0.036377	0.13914
YBR085W	AAC3	5.6	4.8	5.6	4.8	-0.732264	-0.871349	0.13908
YPL216W		5.4	5.1	6.9	6.5	-0.310098	-0.449178	0.13908
YKL124W	SSH4	7.1	7.1	7.6	7.4	-0.054282	-0.19293	0.13865
YKR011C		8.4	8.4	7.2	7.1	-0.019668	-0.158081	0.13841
YOL075C		6.8	6.7	8.5	8.2	-0.126092	-0.26423	0.13814
YJL194W	CDC6	8.1	8	8.3	8.1	-0.089148	-0.22707	0.13792
YMR158W	MRPS8	7.8	7.7	7.1	6.9	-0.085199	-0.222974	0.13777
YOR181W	LAS17	9.3	9.2	8.6	8.3	-0.095316	-0.232987	0.13767
YDL002C	NHP10	7.6	8	6.8	7.1	0.387175	0.249531	0.13764
YER074W	RPS24A	14.3	14.5	13.1	13.2	0.24847	0.111122	0.13735
YOR042W	CUE5	10.2	10.3	9.4	9.5	0.170692	0.033582	0.13711
YNL002C	RLP7	9.7	10	9.1	9.3	0.346972	0.210183	0.13679
YEL026W	SNU13	11.3	11.5	10.4	10.5	0.239429	0.102678	0.13675
YOL129W	VPS68	9.4	9.3	8.9	8.6	-0.138869	-0.275507	0.13664
YJR061W		5.9	5.7	7.9	7.6	-0.175284	-0.311845	0.13656
YLR443W	ECM7	7	6.9	8.4	8.2	-0.097343	-0.233803	0.13646
YDR427W	RPN9	10.1	10.2	9.6	9.6	0.12998	-0.006416	0.1364
YJL106W	IME2	4.5	4.1	6.5	5.9	-0.431306	-0.567675	0.13637
YGR048W	UFD1	8.5	8.7	7.8	7.9	0.201749	0.06573	0.13602
YDL106C	PHO2	7.6	7.5	7.7	7.5	-0.105058	-0.240963	0.13591
YGL036W		8.3	7.9	9.8	9.3	-0.326823	-0.462729	0.13591
YNL001W	DOM34	8.2	8.3	7.9	7.8	0.056367	-0.079215	0.13558
YBR044C	TCM62	6.5	6.5	7.7	7.6	0.02832	-0.107216	0.13554
YML012W	ERV25	10.8	11	10.4	10.4	0.181694	0.046165	0.13553
YHR141C	RPL42B	13.5	13.7	12.6	12.7	0.200425	0.065023	0.1354
YML024W	RPS17A	13.9	14.3	13.1	13.4	0.442501	0.307108	0.13539
YHR010W	RPL27A	13.8	14	12.8	12.9	0.219654	0.084483	0.13517
YDR214W	AHA1	11.4	11.4	10.6	10.4	0.029649	-0.105351	0.135
YBR267W	REI1	8.8	9	8.1	8.1	0.121544	-0.013422	0.13497
YLR167W	RPS31	14.5	14.7	14.3	14.4	0.238733	0.10386	0.13487
YNL102W	POL1	9.4	9.4	9.8	9.7	-0.013778	-0.148639	0.13486
YPL095C	EEB1	7	7.8	7.2	7.9	0.862285	0.728092	0.13419
YNL260C		6.4	7	5.8	6.3	0.578496	0.444374	0.13412
YOL027C	MDM38	10.3	10.4	9.9	9.9	0.130716	-0.003379	0.1341
YJL176C	SWI3	8.8	9.2	8.8	9	0.346409	0.212356	0.13405
YDL112W	TRM3	9.3	9.2	10.3	10	-0.122744	-0.256572	0.13383
YPL007C	TFC8	6.6	6.8	7.7	7.7	0.164633	0.030831	0.1338
YGR127W		6.7	6.9	7.6	7.6	0.155384	0.021709	0.13367
YDL045W-A	MRP10	7.6	7.6	6.9	6.8	0.030153	-0.103461	0.13361
YDR251W	PAM1	8.9	8.9	9.7	9.6	0.024788	-0.10875	0.13354
YLL021W	SPA2	10.2	10.1	10.2	10.1	-0.059893	-0.193399	0.13351
YBR039W	ATP3	11.3	11.7	10.6	10.9	0.452612	0.319138	0.13347
YDL198C	GGC1	10.6	10.5	10	9.8	-0.027833	-0.161256	0.13342
YDL088C	ASM4	8.3	8.3	8.5	8.4	-0.035707	-0.168938	0.13323
YMR241W	YHM2	10.6	10.9	10.4	10.5	0.283077	0.149923	0.13315
YBR158W	AMN1	8.8	9	9.7	9.8	0.221973	0.089195	0.13278
YML025C	YML6	8	8.4	7.5	7.8	0.399171	0.266447	0.13272
YDR416W	SYF1	7.2	7.2	8.1	7.9	-0.017275	-0.14968	0.13241
YHR197W	RIX1	8.7	8.8	8.7	8.7	0.115712	-0.016649	0.13236
YOR215C	AIM41	9	9.3	7.7	7.9	0.32422	0.191911	0.13231
YDL212W	SHR3	10.1	10.1	9.6	9.5	0.069827	-0.062473	0.1323
YMR036C	MIH1	6.5	6.2	7.4	7.1	-0.223027	-0.355183	0.13216
YMR185W		7.3	7	8.7	8.4	-0.248748	-0.380562	0.13181
YDL190C	UFD2	9.5	9.5	9.8	9.7	0.021965	-0.109736	0.1317
YOR043W	WHI2	8.3	8.3	9.2	9	-0.010831	-0.142461	0.13163
YPR171W	BSP1	8	8	8.2	8	-0.054211	-0.185776	0.13156
YJL080C	SCP160	13	12.9	12.7	12.5	-0.100698	-0.232025	0.13133
YNL255C	GIS2	11.6	11.9	10.1	10.4	0.358876	0.22762	0.13126
YBR169C	SSE2	10	10.2	9.8	9.8	0.187837	0.056652	0.13119
YPR113W	PIS1	10	10.2	10	10.1	0.2325	0.101375	0.13113
YLR182W	SWI6	8.1	8.2	8.5	8.5	0.048169	-0.082829	0.131
YGR024C	THG1	7.1	7	8	7.7	-0.092028	-0.222976	0.13095
YEL054C	RPL12A	13.5	13.7	12.4	12.5	0.205069	0.074294	0.13078
YJL193W		6.8	6.6	7.4	7.1	-0.158541	-0.289316	0.13077
YKR072C	SIS2	9	9.2	8.9	9	0.185706	0.054932	0.13077
YER088C	DOT6	10.1	10.5	10.3	10.5	0.348282	0.217917	0.13036
YPL235W	RVB2	10	10	9.6	9.5	0.003075	-0.127282	0.13036
YEL034W	HYP2	14.3	14.6	13.1	13.4	0.360802	0.230756	0.13005
YLR097C	HRT3	6.2	7	6.9	7.6	0.762773	0.632907	0.12987
YHL033C	RPL8A	13.9	14	12.6	12.6	0.119458	-0.010303	0.12976
YCR106W	RDS1	5.6	5.4	7.9	7.6	-0.16674	-0.296311	0.12957
YNL007C	SIS1	11.9	12	10.6	10.5	0.083248	-0.046128	0.12938
YDR458C	HEH2	7.8	8.1	8.2	8.3	0.279225	0.149851	0.12937
YNR008W	LRO1	9	8.8	8.8	8.4	-0.253589	-0.38278	0.12919
YLR300W	EXG1	13.3	13.4	12.7	12.7	0.138982	0.010042	0.12894
YDR415C		7.9	7.7	7.6	7.3	-0.19137	-0.319982	0.12861
YKL173W	SNU114	8.3	8.4	8.8	8.8	0.115524	-0.013087	0.12861
YCR020C-A	MAK31	7.6	7.5	6.8	6.6	-0.025516	-0.154115	0.1286
YLR141W	RRN5	6	6.3	6.7	6.9	0.33197	0.203404	0.12857
YML064C	TEM1	7.1	7.2	7.1	7.1	0.131683	0.003113	0.12857
YNR022C	MRPL50	7.6	8	7.1	7.4	0.382206	0.253633	0.12857
YGR225W	AMA1	4.9	4.8	5.7	5.4	-0.131358	-0.259869	0.12851
YJR058C	APS2	6.8	7	7.2	7.3	0.214729	0.086447	0.12828
YCL029C	BIK1	7.6	7.7	7.6	7.6	0.161327	0.03356	0.12777
YOR163W	DDP1	8.3	8.3	7.7	7.6	0.04255	-0.085203	0.12775
YMR204C	INP1	5.6	5.5	6.1	5.9	-0.079362	-0.207072	0.12771
YNL208W		12.5	12.9	10.8	11.2	0.447973	0.320259	0.12771
YBL087C	RPL23A	13.2	13.4	12.4	12.6	0.259645	0.131953	0.12769
YER008C	SEC3	8.9	8.8	9.8	9.6	-0.0714	-0.198843	0.12744
YCR028C-A	RIM1	10.5	10.7	9	9.1	0.232378	0.105057	0.12732
YDL061C	RPS29B	12.3	12.7	10.6	10.8	0.359994	0.232804	0.12719
YGR118W	RPS23A	13.9	14.2	12.7	12.9	0.292783	0.165686	0.1271
YDR190C	RVB1	10.4	10.5	10.2	10.2	0.100831	-0.026089	0.12692
YMR099C		11	11.1	10.3	10.2	0.090149	-0.036733	0.12688
YNL281W	HCH1	10.3	10.5	9.6	9.7	0.179513	0.052687	0.12683
YKL085W	MDH1	11.6	12.1	10.6	11	0.497854	0.371336	0.12652
YOL143C	RIB4	11.4	13.2	10.5	12.2	1.80302	1.67662	0.1264
YDL020C	RPN4	9	9.1	9.2	9.2	0.119939	-0.0061	0.12604
YLR079W	SIC1	8.7	9.1	8.2	8.5	0.400004	0.274014	0.12599
YGR089W	NNF2	7.4	7.2	8.7	8.3	-0.249215	-0.375193	0.12598
YGR093W		7.1	7.3	7.6	7.6	0.123556	-0.002356	0.12591
YAL044C	GCV3	11.9	12.3	10.6	10.9	0.396726	0.270887	0.12584
YIL061C	SNP1	6.9	6.8	6.8	6.5	-0.101362	-0.227098	0.12574
YPR124W	CTR1	8.6	8.5	8.2	8.1	-0.011109	-0.13674	0.12563
YLR175W	CBF5	11.7	11.8	11.5	11.5	0.179417	0.053829	0.12559
YDR225W	HTA1	12.1	12.3	11	11.2	0.25882	0.133433	0.12539
YFR003C	YPI1	8.5	8.9	7.4	7.7	0.396752	0.271361	0.12539
YDL079C	MRK1	3.5	2.9	5.8	5.1	-0.586024	-0.711382	0.12536
YDR258C	HSP78	10.9	10.7	10.7	10.4	-0.137574	-0.26259	0.12502
YIL144W	TID3	7.5	7.8	8.1	8.2	0.239124	0.114592	0.12453
YHR168W	MTG2	5.9	6	6.8	6.7	0.019872	-0.104247	0.12412
YHL034C	SBP1	12	12.1	10.9	10.8	0.05026	-0.073815	0.12408
YLR009W	RLP24	9.5	9.7	8.5	8.6	0.218192	0.094148	0.12404
YNL103W	MET4	8.3	8.4	8.8	8.8	0.087762	-0.036278	0.12404
YDL103C	QRI1	10	10.1	9	9	0.032307	-0.091702	0.12401
YKR021W	ALY1	7.1	6.9	8.9	8.6	-0.20946	-0.333433	0.12397
YGR031W		7.5	7.8	7.6	7.8	0.282627	0.158679	0.12395
YKL046C	DCW1	9.4	9.4	9.4	9.3	0.009999	-0.113936	0.12393
YOL054W	PSH1	7.4	7.4	6.9	6.8	-0.017521	-0.141378	0.12386
YGR142W	BTN2	7.5	7.3	7.2	6.9	-0.174879	-0.298704	0.12383
YGL117W		8.4	8.2	8.9	8.6	-0.192301	-0.316085	0.12378
YIL062C	ARC15	10.1	10.3	8.9	9	0.250899	0.127596	0.1233
YLR043C	TRX1	11.1	11.4	10	10.1	0.222667	0.099453	0.12321
YGR121C	MEP1	5	4.6	5.5	5	-0.39036	-0.513465	0.1231
YDR468C	TLG1	7.8	7.9	7.4	7.5	0.147444	0.024512	0.12293
YGR270W	YTA7	8.9	9	10.5	10.4	0.05843	-0.064256	0.12269
YDR243C	PRP28	6.9	7	7.5	7.4	0.075107	-0.047549	0.12266
YGL135W	RPL1B	15	15.3	14.3	14.5	0.323173	0.200725	0.12245
YNL032W	SIW14	7.2	7.4	7.4	7.5	0.166363	0.043955	0.12241
YNL110C	NOP15	8.5	8.7	8	8.1	0.178202	0.055961	0.12224
YBR162W-A	YSY6	8.5	8.8	7.7	7.9	0.287433	0.165335	0.1221
YIL069C	RPS24B	14	14.3	12.6	12.7	0.246027	0.123989	0.12204
YMR140W	SIP5	7.8	7.9	8.2	8.2	0.119758	-0.002224	0.12198
YIR004W	DJP1	8.8	9	8.5	8.6	0.216044	0.09416	0.12188
YML130C	ERO1	9.7	9.7	9.4	9.3	0.023349	-0.098411	0.12176
YBR157C	ICS2	4.8	5.7	5.7	6.5	0.947464	0.825734	0.12173
YJR136C	TTI2	6.1	6.3	6.7	6.8	0.245297	0.123744	0.12155
YIL047C	SYG1	9.1	9.3	10.4	10.5	0.13798	0.016458	0.12152
YML127W	RSC9	9.1	9.3	8.9	8.9	0.159808	0.038288	0.12152
YIR039C	YPS6	6.7	6.9	7.9	7.9	0.15946	0.037994	0.12147
YJR083C	ACF4	7.1	7.3	6.5	6.6	0.178153	0.056803	0.12135
YGR235C		9	9.3	8.2	8.4	0.325926	0.204906	0.12102
YGL222C	EDC1	8	8.1	7	7	0.10462	-0.016004	0.12062
YNR046W	TRM112	9.4	9.8	8.2	8.4	0.321344	0.200748	0.1206
YEL017W	GTT3	8.7	8.8	8.3	8.3	0.112982	-0.007574	0.12056
YBR242W		7.9	8	7.5	7.5	0.170475	0.050037	0.12044
YPR103W	PRE2	10.4	10.4	9.6	9.6	0.040432	-0.079931	0.12036
YMR031C		10.2	10.6	9.8	10	0.312804	0.192555	0.12025
YDR163W	CWC15	7.1	7.4	5.9	6.2	0.384748	0.264594	0.12015
YLR040C		7.9	7.8	6.8	6.6	-0.100608	-0.220542	0.11993
YIL157C	COA1	8.6	9	8	8.3	0.455556	0.335713	0.11984
YGR002C	SWC4	7.4	7.2	7.7	7.3	-0.227616	-0.347316	0.1197
YIL151C		7.6	7.7	9.3	9.3	0.101576	-0.017795	0.11937
YPL100W	ATG21	7.3	7.2	7.5	7.3	-0.127006	-0.246033	0.11903
YPL259C	APM1	7.7	7.6	8.2	8.1	-0.049118	-0.168031	0.11891
YBL041W	PRE7	10.7	10.9	9.8	9.9	0.223327	0.104476	0.11885
YJL116C	NCA3	7	7.4	6.4	6.7	0.43601	0.31717	0.11884
YMR135C	GID8	7.9	8.3	8.2	8.5	0.387224	0.268527	0.1187
YDR418W	RPL12B	14.1	14.4	12.9	13.1	0.251777	0.133171	0.11861
YGR130C		10.7	11	9.9	10	0.226949	0.108415	0.11853
YPR080W	TEF1	18.4	18.7	17.6	17.8	0.29541	0.176946	0.11846
YGR081C	SLX9	7.9	8.3	7.4	7.7	0.484583	0.366184	0.1184
YML081W		7.9	7.6	10.1	9.7	-0.282069	-0.400327	0.11826
YBL001C	ECM15	9.4	9.8	8.7	8.9	0.360967	0.242808	0.11816
YAR027W	UIP3	8.7	8.6	8	7.9	-0.03922	-0.157287	0.11807
YER010C		7.4	7.6	7.4	7.5	0.224875	0.106911	0.11796
YER077C		7.7	7.6	8.3	8.1	-0.086661	-0.204598	0.11794
YOR093C		7.4	7.2	9.1	8.9	-0.161478	-0.279167	0.11769
YMR142C	RPL13B	14.2	14.6	13.4	13.7	0.382767	0.265123	0.11764
YDR429C	TIF35	10.8	11	9.9	10.1	0.261338	0.143897	0.11744
YLL050C	COF1	12.8	13	11.5	11.7	0.293339	0.176192	0.11715
YOR319W	HSH49	5.9	5.8	6.4	6.2	-0.083595	-0.200531	0.11694
YDR411C	DFM1	8.6	8.5	8.5	8.2	-0.142291	-0.259199	0.11691
YOL040C	RPS15	14.4	14.7	13.2	13.4	0.28813	0.171513	0.11662
YJR110W	YMR1	6.5	6.3	7.8	7.6	-0.133901	-0.250511	0.11661
YMR113W	FOL3	7.4	7.4	7.5	7.3	-0.021991	-0.138442	0.11645
YNR030W	ALG12	9.4	9.1	9.5	9.1	-0.274522	-0.390814	0.11629
YLR036C		6.1	5.8	6.5	6.2	-0.269031	-0.385311	0.11628
YBR002C	RER2	7.1	7.2	7.7	7.6	0.106485	-0.009771	0.11626
YBL064C	PRX1	10.4	10.8	9.6	10	0.434046	0.317865	0.11618
YDR519W	FPR2	9.3	9.5	8.5	8.6	0.193653	0.077815	0.11584
YER124C	DSE1	9.8	10.2	9.9	10.1	0.331029	0.215239	0.11579
YBR118W	TEF2	18.4	18.7	17.6	17.8	0.296715	0.181046	0.11567
YDL070W	BDF2	8.4	8.5	9.6	9.6	0.095583	-0.019986	0.11557
YPR181C	SEC23	11.8	11.8	11.7	11.6	-0.046379	-0.161484	0.1151
YGL043W	DST1	9.6	9.6	9	8.9	0.041912	-0.073022	0.11493
YDR062W	LCB2	10.3	10.3	10.6	10.4	-0.052291	-0.167024	0.11473
YNL187W	SWT21	3	3.4	6.4	6.6	0.385042	0.270506	0.11454
YNL079C	TPM1	11.9	12.1	10.5	10.6	0.193098	0.078748	0.11435
YLR149C		6.9	6.9	7.7	7.6	-0.063949	-0.178133	0.11418
YNL153C	GIM3	8.6	8.8	7.7	7.7	0.171655	0.057509	0.11415
YNR038W	DBP6	9	8.8	8.8	8.6	-0.104487	-0.218626	0.11414
YMR139W	RIM11	8	8.1	8	8	0.085096	-0.028988	0.11408
YDL048C	STP4	8.1	8.4	7.8	8	0.334154	0.220158	0.114
YKL179C	COY1	8.6	8.7	8.7	8.6	0.109092	-0.004859	0.11395
YLR216C	CPR6	12.1	12.1	11.1	11	0.025801	-0.087902	0.1137
YNL076W	MKS1	7.8	7.9	8	8	0.061986	-0.051659	0.11365
YPL231W	FAS2	14.6	14.7	14.9	14.9	0.085538	-0.028087	0.11362
YBR151W	APD1	8.9	8.6	9.1	8.6	-0.324299	-0.437888	0.11359
YJR063W	RPA12	8.6	8.9	7.5	7.8	0.351526	0.238044	0.11348
YNL064C	YDJ1	12.4	12.5	11.5	11.4	0.044772	-0.068506	0.11328
YBL059C-A	CMC2	7.5	7.7	6.6	6.7	0.206065	0.092844	0.11322
YGL169W	SUA5	7.4	7.6	7.6	7.7	0.214009	0.100791	0.11322
YMR222C	FSH2	8.8	9.1	7.9	8.1	0.294158	0.181618	0.11254
YPR049C	ATG11	7.2	7.1	8.4	8.2	-0.111174	-0.22331	0.11214
YLR034C	SMF3	9.5	9.5	9.4	9.2	-0.015993	-0.127939	0.11195
YKR019C	IRS4	6.2	6.3	7	7	0.054999	-0.056909	0.11191
YGR254W	ENO1	17.3	17.3	15.7	15.6	0.032242	-0.079601	0.11184
YOR067C	ALG8	8.7	8.6	8.9	8.7	-0.123864	-0.23567	0.11181
YNL031C	HHT2	12.9	13.1	11.7	11.8	0.23267	0.12118	0.11149
YFL013C	IES1	8.6	8.6	8.5	8.4	-0.000968	-0.112371	0.1114
YOL082W	ATG19	8.4	8.2	8.7	8.4	-0.105791	-0.216836	0.11105
YHL026C		6.4	6.7	7.3	7.5	0.31155	0.200979	0.11057
YBL030C	PET9	12.9	13.5	12.1	12.6	0.612703	0.502248	0.11045
YPR008W	HAA1	8.4	8.4	8.8	8.7	-0.031918	-0.142249	0.11033
YJL072C	PSF2	7.4	7.5	7	7	0.116171	0.006055	0.11012
YJL109C	UTP10	10.3	10.2	11.6	11.3	-0.119176	-0.229284	0.11011
YNL162W	RPL42A	13.5	13.7	12.6	12.7	0.24498	0.135044	0.10994
YBR293W	VBA2	4.8	5.3	7	7.3	0.415211	0.305511	0.1097
YDR180W	SCC2	8.1	7.8	9	8.5	-0.334988	-0.444651	0.10966
YKR014C	YPT52	9.3	9.4	8.3	8.3	0.127292	0.01774	0.10955
YER151C	UBP3	9.8	9.7	9.7	9.5	-0.114874	-0.224351	0.10948
YMR100W	MUB1	6.6	6.5	8.2	8	-0.093271	-0.202706	0.10944
YOR096W	RPS7A	14.4	14.7	13.4	13.6	0.310771	0.201607	0.10916
YMR028W	TAP42	7.7	7.9	6.9	7	0.19037	0.081255	0.10912
YBR034C	HMT1	9.6	9.4	9.2	9	-0.125279	-0.234258	0.10898
YBL063W	KIP1	6.8	6.7	7.9	7.7	-0.091993	-0.200955	0.10896
YMR096W	SNZ1	10.8	10.7	10.5	10.3	-0.138299	-0.247151	0.10885
YPR063C		10.2	10.3	9.1	9.1	0.079467	-0.029353	0.10882
YJL140W	RPB4	8.6	8.9	8.5	8.7	0.305096	0.196337	0.10876
YER094C	PUP3	10.5	10.7	9.7	9.8	0.197084	0.088407	0.10868
YPR165W	RHO1	11.1	11.4	10.4	10.6	0.259983	0.151376	0.10861
YOL026C	MIM1	8.7	8.8	8.1	8.1	0.064973	-0.043447	0.10842
YDR177W	UBC1	10.1	10.3	8.7	8.8	0.153028	0.044686	0.10834
YLR248W	RCK2	10	9.9	10.1	9.9	-0.176655	-0.284955	0.1083
YNL297C	MON2	9.3	9.1	10.5	10.1	-0.262522	-0.370576	0.10805
YBR058C-A	TSC3	7.8	8.1	7	7.1	0.215111	0.107083	0.10803
YJL167W	ERG20	12.1	12	11	10.8	-0.038036	-0.145985	0.10795
YDL029W	ARP2	10.7	10.8	10.4	10.4	0.114051	0.006126	0.10793
YER018C	SPC25	7.2	7.5	7.2	7.4	0.29148	0.183695	0.10778
YPR060C	ARO7	8.9	9	8.2	8.2	0.107248	-0.000518	0.10777
YDL224C	WHI4	8.9	8.9	9.2	9.1	0.02181	-0.085602	0.10741
YNL044W	YIP3	9.7	9.8	9.2	9.2	0.102721	-0.004551	0.10727
YGL017W	ATE1	7.2	7.2	7.5	7.5	0.069636	-0.037415	0.10705
YKL125W	RRN3	8.2	8.4	8.3	8.4	0.180646	0.073606	0.10704
YPL081W	RPS9A	12.3	12.7	10.8	11.1	0.398813	0.29188	0.10693
YIL159W	BNR1	6.9	6.6	8.3	7.9	-0.236293	-0.343211	0.10692
YDR299W	BFR2	8.8	9.2	8.2	8.4	0.362753	0.255891	0.10686
YPL059W	GRX5	9.3	9.6	8.3	8.4	0.220188	0.113372	0.10682
YML069W	POB3	10.1	10.2	9.5	9.5	0.080292	-0.026522	0.10681
YMR015C	ERG5	10.7	10.7	9.9	9.8	-0.02907	-0.135864	0.10679
YDR518W	EUG1	9.4	9.2	9.1	8.8	-0.238246	-0.344911	0.10667
YOL063C	CRT10	6.9	7	8.6	8.6	0.038883	-0.067746	0.10663
YHR165C	PRP8	8.9	8.5	11.2	10.7	-0.373523	-0.48014	0.10662
YGR080W	TWF1	9.5	9.7	8.4	8.4	0.174604	0.068001	0.1066
YLR422W		7.9	7.7	10.1	9.9	-0.190724	-0.29718	0.10646
YMR117C	SPC24	6.1	6	6.2	6	-0.086154	-0.192544	0.10639
YOL025W	LAG2	7.2	7.1	7.5	7.3	-0.113655	-0.2199	0.10625
YOR323C	PRO2	11.7	11.9	10.9	10.9	0.138158	0.03197	0.10619
YIL156W	UBP7	7.4	7.2	9	8.6	-0.289436	-0.395453	0.10602
YNR026C	SEC12	8.8	8.9	8.5	8.4	0.040727	-0.065275	0.106
YGR248W	SOL4	8.9	9.3	8.2	8.4	0.370656	0.264773	0.10588
YGR209C	TRX2	11.2	11.5	9.9	10.1	0.370175	0.264319	0.10586
YPR045C	THP3	8.3	8.3	8.2	8.1	0.003598	-0.102227	0.10583
YKL215C	OXP1	9.5	9.3	10	9.7	-0.147891	-0.253619	0.10573
YNL175C	NOP13	9.9	9.9	9.1	9	-0.012661	-0.11833	0.10567
YMR075W	RCO1	7.6	7.7	7.6	7.6	0.084311	-0.021273	0.10558
YDR325W	YCG1	7.5	7.5	8.6	8.5	-0.005582	-0.111065	0.10548
YML094W	GIM5	8.8	8.9	7.7	7.6	0.077498	-0.027798	0.1053
YPR033C	HTS1	11.7	11.7	11.5	11.4	-0.017327	-0.122599	0.10527
YBR006W	UGA2	7.9	7.8	7.7	7.5	-0.084017	-0.189195	0.10518
YDL083C	RPS16B	13.3	13.6	12.3	12.5	0.332665	0.227605	0.10506
YER040W	GLN3	7.8	7.6	8.5	8.2	-0.192727	-0.297565	0.10484
YOR337W	TEA1	7.5	7.6	8.9	8.9	0.103243	-0.001593	0.10484
YJL034W	KAR2	12.9	12.8	13	12.8	-0.09964	-0.204464	0.10482
YNR040W		7.3	7.4	7.1	7.1	0.125753	0.021028	0.10473
YLR150W	STM1	14.5	14.7	13.4	13.4	0.146046	0.041341	0.1047
YDL055C	PSA1	13.9	14	12.8	12.8	0.105567	0.00095	0.10462
YFR010W	UBP6	10.2	10.3	9.7	9.7	0.136486	0.031881	0.10461
YKL181W	PRS1	10.5	10.6	10.7	10.8	0.166582	0.062018	0.10456
YOR070C	GYP1	7.6	7.8	8.2	8.2	0.170307	0.06589	0.10442
YLR260W	LCB5	7.8	7.8	8.5	8.3	-0.068039	-0.172426	0.10439
YMR224C	MRE11	6.7	6.8	7.5	7.4	0.062052	-0.041961	0.10401
YLR133W	CKI1	9.3	9.1	8.8	8.5	-0.206047	-0.309992	0.10394
YIL104C	SHQ1	7.6	7.6	7.5	7.3	-0.020756	-0.12468	0.10392
YMR014W	BUD22	7.9	8.1	7.6	7.7	0.217764	0.114042	0.10372
YDR489W	SLD5	7	7.2	6.7	6.8	0.198347	0.0948	0.10355
YPR188C	MLC2	8.5	8.8	7.9	8	0.248239	0.14471	0.10353
YDR005C	MAF1	6.8	7.2	7.4	7.8	0.443673	0.340177	0.1035
YPL012W	RRP12	10.4	10.2	10.6	10.3	-0.140922	-0.244394	0.10347
YNL301C	RPL18B	13.3	13.4	11.8	11.9	0.194653	0.091267	0.10339
YDL201W	TRM8	8.9	9	8.3	8.3	0.093014	-0.010239	0.10325
YMR316W	DIA1	5.9	5.8	6.8	6.6	-0.088689	-0.191792	0.1031
YMR011W	HXT2	9.8	9.9	9	9	0.112994	0.009934	0.10306
YDL225W	SHS1	9.3	9.4	8.8	8.7	0.035913	-0.066948	0.10286
YNL052W	COX5A	9.9	10.5	8.8	9.3	0.595204	0.492374	0.10283
YJR144W	MGM101	8.9	9	8.6	8.6	0.087117	-0.015559	0.10268
YBR073W	RDH54	9.3	9.3	10.1	10	-0.01036	-0.113028	0.10267
YGL096W	TOS8	6.1	6.2	6.5	6.5	0.08093	-0.021604	0.10253
YDR407C	TRS120	8.1	7.9	9.6	9.2	-0.230576	-0.332841	0.10226
YBR065C	ECM2	6.6	6.7	7.3	7.3	0.070236	-0.031926	0.10216
YKL054C	DEF1	12.3	12.2	11.3	11.1	-0.153496	-0.255659	0.10216
YML085C	TUB1	11.1	11.1	11	10.9	0.031635	-0.070419	0.10205
YOR176W	HEM15	10.1	9.8	9.5	9.1	-0.297821	-0.399763	0.10194
YDR517W	GRH1	9.3	9.4	9.3	9.2	0.026285	-0.075473	0.10176
YOR057W	SGT1	8.3	8.7	8	8.3	0.406553	0.304859	0.10169
YKL212W	SAC1	11.3	11.3	11	10.9	-0.030634	-0.131829	0.1012
YGR264C	MES1	11.6	11.6	11.6	11.4	-0.058353	-0.159525	0.10117
YOR161C	PNS1	8.4	8.9	8.6	9.1	0.549989	0.448958	0.10103
YJR056C		6.7	6.9	6.3	6.4	0.203218	0.102206	0.10101
YIL050W	PCL7	7.7	8.2	7.8	8.2	0.516957	0.415972	0.10098
YOR254C	SEC63	10.3	10.1	10.3	10	-0.204188	-0.30511	0.10092
YMR086W		9	8.9	9.3	9.1	-0.072755	-0.173333	0.10058
YNL264C	PDR17	8.5	8.6	8.2	8.2	0.044036	-0.056498	0.10053
YCL010C	SGF29	7.3	7.3	7.8	7.8	0.018624	-0.081829	0.10045
YIL158W	AIM20	6.7	6.8	7.5	7.5	0.123335	0.023029	0.10031
YOR037W	CYC2	6.2	5.9	6.7	6.3	-0.31229	-0.412604	0.10031
YIL084C	SDS3	6.8	6.7	6.7	6.5	-0.143254	-0.243006	0.09975
YDR226W	ADK1	12.8	12.9	11.5	11.5	0.098021	-0.001593	0.09961
YNL183C	NPR1	8.6	8.6	8.8	8.7	0.01476	-0.084837	0.0996
YGR086C	PIL1	12.5	12.7	11.9	12	0.162663	0.063083	0.09958
YHR101C	BIG1	6.7	6.7	6.7	6.7	0.036511	-0.062907	0.09942
YDL236W	PHO13	9.7	9.9	9.1	9.2	0.204037	0.104824	0.09921
YLR264W	RPS28B	12.2	12.4	10.9	11	0.20653	0.107613	0.09892
YLL024C	SSA2	16.2	16.1	15.3	15.1	-0.079354	-0.178215	0.09886
YJR060W	CBF1	9.2	9.4	8	8.1	0.222706	0.123892	0.09881
YDR430C	CYM1	8.8	8.6	9.5	9.2	-0.200326	-0.299118	0.09879
YNR020C	ATP23	6.9	7.2	6.2	6.4	0.278054	0.179285	0.09877
YGR009C	SEC9	8.9	9.1	8.3	8.4	0.227576	0.128859	0.09872
YIL051C	MMF1	12.5	13	11.3	11.7	0.443145	0.344549	0.0986
YDR444W		6.2	6.2	7.8	7.6	-0.008571	-0.107139	0.09857
YLR297W		6.6	6.9	6.1	6.3	0.311578	0.21311	0.09847
YMR196W		9.4	9.2	9.8	9.6	-0.181328	-0.279705	0.09838
YDR482C	CWC21	6.6	6.8	6.1	6.2	0.227566	0.129263	0.0983
YHR023W	MYO1	9.6	9.5	10.3	10.1	-0.121682	-0.21981	0.09813
YDR046C	BAP3	9.8	9.8	10.4	10.3	-0.021774	-0.119768	0.09799
YBL103C	RTG3	7.5	7.6	7.5	7.5	0.106752	0.009029	0.09772
YER112W	LSM4	8.1	8.2	7.1	7	0.026872	-0.070629	0.0975
YJL130C	URA2	13.4	13.4	13.7	13.6	-0.030687	-0.128046	0.09736
YBR046C	ZTA1	8.6	8.3	8	7.6	-0.302232	-0.399562	0.09733
YIR038C	GTT1	8.8	8.9	8.5	8.6	0.164795	0.067748	0.09705
YNR028W	CPR8	7.7	7.9	7.9	7.9	0.188137	0.091096	0.09704
YJR085C		9.3	9.7	9.2	9.5	0.382389	0.285442	0.09695
YKL116C	PRR1	7.6	7.8	8	8	0.128594	0.032162	0.09643
YDR097C	MSH6	9	8.9	9.5	9.3	-0.071801	-0.168224	0.09642
YPR122W	AXL1	7.9	7.7	9.3	9	-0.19187	-0.28805	0.09618
YBR025C	OLA1	12.9	12.8	12.1	12	-0.060784	-0.156912	0.09613
YOR132W	VPS17	8.4	8.6	8.8	8.8	0.144569	0.048444	0.09613
YOR112W	CEX1	8.8	8.6	8.9	8.6	-0.140119	-0.235735	0.09562
YHR021C	RPS27B	13.7	13.9	12.1	12.3	0.244194	0.148591	0.0956
YPL173W	MRPL40	8.1	8.5	7.1	7.4	0.385008	0.289543	0.09547
YNR066C		7.6	7.4	8.9	8.6	-0.178898	-0.274293	0.0954
YMR157C	AIM36	7.3	7.7	7.1	7.3	0.331566	0.236269	0.0953
YDL117W	CYK3	8.3	8.3	9.1	9	-0.021161	-0.116134	0.09497
YMR124W		9.2	9.1	9.4	9.2	-0.121708	-0.216648	0.09494
YDR524C	AGE1	7	7	8.2	8.1	0.034333	-0.060447	0.09478
YGL106W	MLC1	10.5	10.8	9.3	9.5	0.278615	0.183831	0.09478
YER157W	COG3	8.1	8.2	8.5	8.5	0.026692	-0.068011	0.0947
YHL021C	AIM17	10.7	10.7	9.9	9.8	0.024963	-0.069736	0.0947
YBR252W	DUT1	9.1	9.4	8.4	8.5	0.256407	0.161743	0.09466
YGL080W	FMP37	7.9	8.1	6.5	6.7	0.254047	0.159386	0.09466
YBR120C	CBP6	7	7.1	5.8	5.8	0.10237	0.007849	0.09452
YPR002W	PDH1	6.3	5.6	6.7	6	-0.630032	-0.724247	0.09422
YDL160C	DHH1	11.6	11.5	10.8	10.6	-0.083891	-0.178102	0.09421
YDR171W	HSP42	10.3	10.4	9.5	9.4	0.064902	-0.02924	0.09414
YNL139C	THO2	9.4	9.3	10.2	10	-0.079723	-0.173839	0.09412
YIL145C	PAN6	9	8.8	8.9	8.7	-0.133532	-0.227441	0.09391
YJR118C	ILM1	7.8	8	7.4	7.5	0.204445	0.110565	0.09388
YOR117W	RPT5	10.7	10.8	10.1	10.2	0.141881	0.048049	0.09383
YMR181C		6.6	6.7	6.5	6.5	0.141605	0.04802	0.09358
YDR412W	RRP17	8	8.2	7.3	7.5	0.223984	0.130571	0.09341
YJL170C	ASG7	7.3	6.7	6.6	6	-0.529561	-0.622889	0.09333
YKL182W	FAS1	14.8	14.9	15.1	15.1	0.052104	-0.041226	0.09333
YLR270W	DCS1	10.2	10.2	9.1	9	0.008061	-0.084955	0.09302
YMR056C	AAC1	4.3	4.6	6.6	6.8	0.323947	0.231154	0.09279
YGL215W	CLG1	9.1	9	10.9	10.7	-0.094111	-0.186721	0.09261
YDR447C	RPS17B	13.6	14	12.6	12.9	0.40456	0.312241	0.09232
YMR240C	CUS1	7.1	7.3	7.3	7.4	0.232742	0.140425	0.09232
YLR353W	BUD8	6.5	6.6	8.3	8.3	0.109909	0.017859	0.09205
YPL224C	MMT2	7.4	7.1	8	7.7	-0.208637	-0.300315	0.09168
YGL023C	PIB2	8.6	8.7	9.2	9.1	0.05166	-0.039987	0.09165
YNL284C	MRPL10	8.1	8.3	8	8.2	0.220579	0.128932	0.09165
YER120W	SCS2	11.6	11.9	10.4	10.6	0.31996	0.228562	0.0914
YER125W	RSP5	10.9	10.8	11.1	11	-0.05018	-0.141446	0.09127
YKL081W	TEF4	13.9	13.9	13.3	13.2	-0.037493	-0.128723	0.09123
YGL112C	TAF6	8.7	8.9	8.9	9	0.227385	0.136168	0.09122
YPL091W	GLR1	10.4	10.5	10	10.1	0.13679	0.045578	0.09121
YKL100C		9.1	9.3	9.5	9.6	0.192003	0.10085	0.09115
YIL137C	TMA108	10.1	10	10	9.8	-0.150264	-0.241334	0.09107
YOR018W	ROD1	7.6	7.5	8	7.8	-0.064609	-0.155639	0.09103
YOR104W	PIN2	7.6	7.7	7.5	7.5	0.117447	0.026486	0.09096
YMR226C		11.6	11.9	10.6	10.8	0.275193	0.184427	0.09077
YCR002C	CDC10	9.8	9.8	9.2	9.1	-0.028663	-0.11935	0.09069
YFL038C	YPT1	11.5	11.6	10.5	10.6	0.168873	0.078194	0.09068
YBL089W	AVT5	6.7	6.7	7.4	7.3	-0.059884	-0.150149	0.09026
YGL201C	MCM6	9.1	8.9	9.7	9.4	-0.206914	-0.296861	0.08995
YKL127W	PGM1	10.5	10.1	10.1	9.6	-0.390473	-0.480277	0.0898
YHR174W	ENO2	18	17.9	16.8	16.6	-0.071391	-0.161141	0.08975
YGR141W	VPS62	8.1	8	8	7.9	-0.048231	-0.137905	0.08967
YFL028C	CAF16	8.1	8.6	8	8.4	0.503029	0.413582	0.08945
YLR335W	NUP2	10.6	10.7	10.1	10.1	0.039207	-0.050172	0.08938
YML078W	CPR3	11.5	11.8	10	10.2	0.273205	0.183871	0.08933
YKL023W		7.5	7.7	7.3	7.3	0.140026	0.050775	0.08925
YLR320W	MMS22	4.5	4.3	8.2	7.9	-0.198732	-0.28779	0.08906
YHR118C	ORC6	7.5	7.5	7	6.9	0.007894	-0.080967	0.08886
YFR034W-A		4.2	4.7	5.2	5.6	0.423122	0.334436	0.08869
YOL001W	PHO80	4.4	4.5	6.5	6.5	0.090678	0.002179	0.0885
YHR206W	SKN7	8.5	8.8	9	9.1	0.213311	0.124931	0.08838
YML038C	YMD8	7.7	7.6	8.6	8.4	-0.041855	-0.130103	0.08825
YNL108C		8.8	8.9	7.8	7.8	0.136325	0.048099	0.08823
YBL045C	COR1	11.4	11.7	10.6	10.8	0.33965	0.251539	0.08811
YDR507C	GIN4	9.6	9.5	9.8	9.6	-0.107021	-0.19507	0.08805
YCL051W	LRE1	7.1	7.1	7.3	7.2	0.026801	-0.061227	0.08803
YKL092C	BUD2	7.2	6.9	8.4	8	-0.332525	-0.420543	0.08802
YLR441C	RPS1A	14.1	14.2	13.5	13.5	0.177864	0.090006	0.08786
YDR309C	GIC2	10.2	10.4	9.4	9.6	0.247014	0.159267	0.08775
YHR177W		5.5	5.1	6.2	5.7	-0.400332	-0.487849	0.08752
YAR002W	NUP60	9.5	9.5	9	8.9	0.005509	-0.081691	0.0872
YLL041C	SDH2	9.7	10.3	8.9	9.4	0.610114	0.522913	0.0872
YAL040C	CLN3	8.8	8.6	10.1	9.9	-0.101662	-0.188814	0.08715
YNL067W	RPL9B	13.5	13.7	12	12.1	0.213161	0.126103	0.08706
YGL076C	RPL7A	15.1	15.3	13.9	14.1	0.246088	0.159062	0.08703
YHR190W	ERG9	11.3	11.4	10.5	10.6	0.105693	0.018995	0.0867
YMR062C	ARG7	11.7	12	11.3	11.5	0.260873	0.174216	0.08666
YDR439W	LRS4	5.8	5.5	6.7	6.4	-0.293492	-0.380103	0.08661
YOR028C	CIN5	7.9	8.1	7.2	7.4	0.261979	0.175423	0.08656
YCL001W	RER1	8.5	8.4	8	7.9	-0.036707	-0.122507	0.0858
YNR031C	SSK2	8	7.9	9.7	9.5	-0.108919	-0.194724	0.0858
YDR116C	MRPL1	8.1	8.3	8	8.1	0.256258	0.170533	0.08572
YCR015C		6.1	6.4	6.6	6.8	0.271797	0.186342	0.08545
YOR092W	ECM3	7.5	7.7	8.5	8.6	0.125202	0.039828	0.08537
YMR270C	RRN9	5.5	5.8	7.2	7.4	0.278757	0.193588	0.08517
YDR305C	HNT2	7.3	7.5	6.5	6.6	0.182548	0.097406	0.08514
YGR027C	RPS25A	13.5	13.7	13.1	13.2	0.201461	0.116385	0.08508
YLR249W	YEF3	16.3	16.4	16.1	16	0.016528	-0.067819	0.08435
YHR018C	ARG4	12.4	12.6	12	12.1	0.198762	0.114504	0.08426
YIR008C	PRI1	8.1	8.1	7.9	7.8	-0.011884	-0.096134	0.08425
YJL168C	SET2	8.3	8	8.3	7.9	-0.349636	-0.433765	0.08413
YDR376W	ARH1	7.7	7.6	8.3	8.1	-0.109974	-0.193878	0.0839
YIL052C	RPL34B	13.3	13.5	12.4	12.5	0.179276	0.095449	0.08383
YOL122C	SMF1	9.2	9.1	9.2	9	-0.111458	-0.194786	0.08333
YFR052W	RPN12	10	10.3	9.4	9.5	0.238393	0.15523	0.08316
YOR369C	RPS12	13.7	14	13.7	13.9	0.303134	0.220029	0.0831
YHR104W	GRE3	10.9	11	10.1	10.1	0.157881	0.074828	0.08305
YLR212C	TUB4	7.7	7.9	8.1	8.2	0.202702	0.119662	0.08304
YOR217W	RFC1	9.3	9.2	9.6	9.4	-0.100819	-0.183652	0.08283
YKL143W	LTV1	8.7	8.7	8.4	8.4	0.067152	-0.015542	0.08269
YJR088C	EMC2	8.7	8.7	8.4	8.4	0.062309	-0.020041	0.08235
YKL073W	LHS1	9.7	9.5	9.7	9.4	-0.180554	-0.262586	0.08203
YOR116C	RPO31	9.9	9.6	10.9	10.5	-0.305957	-0.387928	0.08197
YNL158W	PGA1	7.4	7.4	7	6.9	-0.011607	-0.093514	0.08191
YJL132W		7.2	7	8.1	7.9	-0.157561	-0.239189	0.08163
YDR348C		9.1	9.1	8.5	8.5	0.004605	-0.076938	0.08154
YML107C	PML39	6.6	6.9	6.7	6.9	0.25843	0.176963	0.08147
YGR078C	PAC10	9.1	9.4	8.1	8.3	0.251696	0.170315	0.08138
YLR219W	MSC3	8.6	8.7	8.9	8.8	0.043794	-0.037315	0.08111
YGR277C	CAB4	8.2	8.3	7.9	7.9	0.078721	-0.002311	0.08103
YKL012W	PRP40	7.4	7.4	8.3	8.2	-0.031655	-0.112411	0.08076
YPL212C	PUS1	9.6	9.5	9.5	9.3	-0.060384	-0.141059	0.08068
YJR013W	GPI14	7.4	7.5	7.3	7.3	0.123615	0.043166	0.08045
YOR260W	GCD1	9.6	9.5	10.1	9.9	-0.172027	-0.252438	0.08041
YLR359W	ADE13	10.8	10.8	10.6	10.4	-0.080459	-0.160859	0.0804
YJR094C	IME1	4.9	5.2	5.5	5.6	0.238353	0.157979	0.08037
YCL031C	RRP7	8.5	8.4	8.4	8.2	-0.068416	-0.148715	0.0803
YOR142W	LSC1	10.8	10.7	10	9.9	-0.024052	-0.104285	0.08023
YGL195W	GCN1	12.8	12.7	13.5	13.3	-0.125757	-0.205926	0.08017
YDR235W	PRP42	6.8	6.7	7.3	7.2	-0.083531	-0.163647	0.08012
YHR066W	SSF1	8.7	8.8	8.2	8.2	0.081819	0.001758	0.08006
YBR282W	MRPL27	7.8	8.3	6.9	7.2	0.440189	0.360244	0.07994
YOL158C	ENB1	7.2	7.1	8.7	8.6	-0.02229	-0.102045	0.07975
YDR099W	BMH2	12.4	12.6	11.2	11.3	0.192921	0.113231	0.07969
YPL198W	RPL7B	14.7	14.9	13.4	13.5	0.234932	0.15531	0.07962
YGL026C	TRP5	13.3	13.4	12.8	12.8	0.046659	-0.032936	0.07959
YPL145C	KES1	10.7	10.8	10.2	10.2	0.075373	-0.004197	0.07957
YBR138C		7.7	7.8	7.5	7.5	0.104715	0.025178	0.07954
YOL031C	SIL1	8.3	8.4	8	8	0.114707	0.035249	0.07946
YCR047C	BUD23	8.7	8.9	7.7	7.8	0.189758	0.110462	0.0793
YPR170W-B		9.4	9.5	9	9	0.087363	0.008254	0.07911
YJL098W	SAP185	8.6	8.7	9.3	9.3	0.090093	0.011158	0.07894
YGR208W	SER2	9.3	9.2	8.8	8.6	-0.051402	-0.130084	0.07868
YMR251W-A	HOR7	12.4	13.1	11.2	11.9	0.721808	0.643187	0.07862
YPL178W	CBC2	9.1	9.1	8.4	8.4	0.061901	-0.016714	0.07862
YJL177W	RPL17B	13.3	13.5	12.1	12.3	0.204655	0.126422	0.07823
YBR149W	ARA1	11.3	11.5	10.5	10.6	0.201334	0.123622	0.07771
YCR094W	CDC50	7.9	7.9	8.3	8.2	-0.038526	-0.116053	0.07753
YPR088C	SRP54	10.5	10.5	10.3	10.3	0.01925	-0.058102	0.07735
YCL033C	MXR2	9	9.3	8.2	8.4	0.300169	0.22334	0.07683
YGL030W	RPL30	13.5	13.7	12.7	12.8	0.232662	0.155923	0.07674
YPL269W	KAR9	4.6	4.6	7	6.8	-0.051475	-0.128177	0.0767
YDL116W	NUP84	8.8	8.8	9.3	9.1	-0.039599	-0.11624	0.07664
YCR011C	ADP1	9.4	9.2	10.1	9.9	-0.164306	-0.240906	0.0766
YGR221C	TOS2	4.6	5	7	7.3	0.434443	0.357845	0.0766
YAL003W	EFB1	14.4	14.5	13.2	13.2	0.174409	0.097947	0.07646
YDR306C		6.8	7	7.4	7.5	0.155555	0.079127	0.07643
YBR150C	TBS1	6.6	6.3	8.4	8	-0.250627	-0.327018	0.07639
YCR081W	SRB8	7.5	7.4	9	8.9	-0.051542	-0.127837	0.07629
YGL197W	MDS3	8.7	8.5	10.4	10.1	-0.214762	-0.290981	0.07622
YDL175C	AIR2	7.3	7.5	6.8	6.9	0.207054	0.130851	0.0762
YAL005C	SSA1	16.1	16.1	15.2	15	-0.062461	-0.138619	0.07616
YCR077C	PAT1	10.7	10.8	10.2	10.3	0.115074	0.038958	0.07612
YPL210C	SRP72	9.5	9.5	9.5	9.4	-0.020323	-0.096317	0.07599
YJL012C	VTC4	9.9	9.9	9.9	9.8	-0.036964	-0.112852	0.07589
YPL043W	NOP4	9.3	9.4	9.2	9.2	0.121309	0.045764	0.07555
YGL123W	RPS2	14.6	14.8	14	14.1	0.187798	0.112257	0.07554
YOR061W	CKA2	9.4	9.4	8.7	8.7	-0.02033	-0.095756	0.07543
YKL197C	PEX1	7.4	7.2	8.7	8.5	-0.177273	-0.25245	0.07518
YGR241C	YAP1802	8.4	8.4	8.8	8.7	-0.024419	-0.099561	0.07514
YLL006W	MMM1	7.8	7.9	8	8.1	0.124707	0.049675	0.07503
YGR155W	CYS4	12.7	12.5	12.1	11.9	-0.140527	-0.215433	0.07491
YPR139C	VPS66	7.7	7.7	8.1	7.9	-0.044655	-0.119305	0.07465
YOR182C	RPS30B	12.9	13	11.6	11.6	0.091094	0.016709	0.07438
YER100W	UBC6	9.4	9.4	8.3	8.2	-0.034723	-0.108829	0.07411
YHR143W-A	RPC10	9.3	9.6	8.2	8.4	0.24775	0.173675	0.07407
YER164W	CHD1	9.4	9.4	9.9	9.8	-0.017707	-0.091593	0.07389
YAL025C	MAK16	8.8	8.9	8.1	8.2	0.144717	0.070862	0.07386
YMR315W		11.5	11.6	10.7	10.7	0.104495	0.030642	0.07385
YOR264W	DSE3	8.3	8.5	8	8.1	0.205144	0.131509	0.07363
YDR079C-A	TFB5	6.6	6.7	6.3	6.3	0.152264	0.078784	0.07348
YFL046W	FMP32	7.3	7.6	7.2	7.4	0.265238	0.192182	0.07306
YHR138C		7.4	7.9	6.3	6.7	0.468858	0.396053	0.0728
YNL286W	CUS2	6	6	6.7	6.6	0.011334	-0.061387	0.07272
YIR018W	YAP5	6.1	6.3	6.6	6.7	0.251738	0.179028	0.07271
YIR034C	LYS1	11.5	11.4	10.6	10.4	-0.124016	-0.196585	0.07257
YHR074W	QNS1	9.9	9.9	10.2	10.1	0.001473	-0.071004	0.07248
YPL151C	PRP46	6.4	6.4	7.7	7.6	-0.021582	-0.093933	0.07235
YNL097C	PHO23	7.2	7.3	6.6	6.6	0.08482	0.012518	0.0723
YNR003C	RPC34	8.5	8.5	8	8	0.020907	-0.051239	0.07215
YOR118W	RTC5	7.2	7.5	7.8	8	0.320228	0.248115	0.07211
YPL170W	DAP1	8.3	8.3	7.5	7.4	-0.039333	-0.111447	0.07211
YBR080C	SEC18	10.6	10.6	10.2	10.1	-0.082553	-0.154623	0.07207
YDL215C	GDH2	9.4	9.3	9.9	9.7	-0.099352	-0.171401	0.07205
YOR040W	GLO4	6.3	6.4	6.6	6.7	0.179711	0.107715	0.072
YKL117W	SBA1	11.7	11.7	10.3	10.3	0.059037	-0.012799	0.07184
YDL203C	ACK1	7.7	7.6	8.3	8.1	-0.090908	-0.162732	0.07182
YBR275C	RIF1	8.2	8.1	9.7	9.5	-0.109916	-0.181625	0.07171
YDR283C	GCN2	8.4	8.2	9.9	9.7	-0.192798	-0.264321	0.07152
YKR008W	RSC4	8.5	8.4	8.7	8.5	-0.111244	-0.182273	0.07103
YDL022W	GPD1	12.4	12.6	11.3	11.4	0.242323	0.171303	0.07102
YMR271C	URA10	5.4	4.3	6.4	5.3	-1.02214	-1.09294	0.0708
YMR305C	SCW10	11.8	11.8	11.2	11.2	0.067624	-0.003104	0.07073
YJL063C	MRPL8	8.7	9	7.9	8.1	0.313302	0.242681	0.07062
YDR208W	MSS4	8.8	8.9	9.6	9.6	0.113912	0.043404	0.07051
YDR338C		6.9	6.8	7.6	7.4	-0.135576	-0.205972	0.0704
YKR038C	KAE1	8.8	8.9	9	8.9	0.035351	-0.035025	0.07038
YER166W	DNF1	9.3	9.3	10.6	10.5	-0.076842	-0.147083	0.07024
YLR294C		6.8	7.3	7.9	8.3	0.535055	0.464994	0.07006
YLR253W		7.2	7.1	8.2	8	-0.110645	-0.180686	0.07004
YDR368W	YPR1	10.3	10.2	9.4	9.2	-0.150864	-0.220874	0.07001
YER013W	PRP22	7.6	7.7	8.2	8.2	0.05613	-0.013679	0.06981
YPR097W		8.7	8.7	9.4	9.3	-0.053921	-0.123598	0.06968
YGL155W	CDC43	7.1	6.9	8.3	8	-0.202815	-0.27247	0.06965
YER078C	ICP55	7.2	7.1	8	7.8	-0.083215	-0.152802	0.06959
YER117W	RPL23B	13.7	13.9	13	13.1	0.225251	0.155769	0.06948
YPL221W	FLC1	9.6	9.7	10.6	10.6	0.031126	-0.038029	0.06915
YKR075C		6.9	7	6.6	6.6	0.104572	0.035628	0.06894
YOL151W	GRE2	8.6	8.9	8.3	8.5	0.308152	0.239389	0.06876
YLR413W		10.7	10.6	10.6	10.4	-0.164193	-0.23279	0.0686
YOL009C	MDM12	5.9	6.1	6.5	6.7	0.277074	0.208811	0.06826
YBL002W	HTB2	11.9	12.2	10.4	10.6	0.319309	0.251127	0.06818
YKL140W	TGL1	8.3	8.1	8.4	8.1	-0.210372	-0.278542	0.06817
YER006W	NUG1	10.6	10.7	10.3	10.2	0.058154	-0.009807	0.06796
YOL081W	IRA2	8.7	8.4	11.5	11.2	-0.243436	-0.311277	0.06784
YKR065C	PAM17	9.6	9.6	8.8	8.8	0.059609	-0.008197	0.06781
YKL035W	UGP1	12.6	12.7	11.6	11.6	0.044185	-0.023568	0.06775
YIR011C	STS1	8.2	8.4	7.8	7.9	0.198954	0.13125	0.0677
YJL054W	TIM54	8.3	8.4	9	9	0.094939	0.0276	0.06734
YHR135C	YCK1	9.8	9.8	10	10	0.068455	0.001168	0.06729
YJL173C	RFA3	8.9	8.9	8	7.9	-0.010243	-0.077498	0.06726
YLR229C	CDC42	10	10.1	9.3	9.3	0.114221	0.047453	0.06677
YDR295C	HDA2	7.6	7.4	8	7.8	-0.205746	-0.272438	0.06669
YBR035C	PDX3	11	11.1	9.9	10	0.090766	0.02426	0.06651
YNL223W	ATG4	6.4	6.4	6.8	6.7	0.012601	-0.053638	0.06624
YOR226C	ISU2	10	10.1	9	9.1	0.143811	0.077614	0.0662
YPR036W	VMA13	12.2	12.2	11.7	11.6	-0.068691	-0.13489	0.0662
YDR262W		7.9	8.2	8	8.1	0.202474	0.136283	0.06619
YLR206W	ENT2	9.6	9.6	9.8	9.7	-0.006502	-0.072487	0.06599
YML082W		7.6	7.4	8.3	8.1	-0.154562	-0.220488	0.06593
YDR341C		12.5	12.3	12	11.8	-0.111258	-0.176965	0.06571
YDL085W	NDE2	4.3	3.8	5.3	4.7	-0.492828	-0.558508	0.06568
YMR215W	GAS3	10.1	10	9.8	9.7	-0.011684	-0.077262	0.06558
YIL103W	DPH1	7.7	7.8	7.5	7.6	0.114738	0.049406	0.06533
YDR019C	GCV1	10.9	11.4	10.7	11.1	0.479779	0.414539	0.06524
YDR179W-A		5.5	5	7.1	6.5	-0.58437	-0.649578	0.06521
YMR208W	ERG12	9.3	9.2	8.9	8.7	-0.12356	-0.188723	0.06516
YLR115W	CFT2	7.2	7	8.7	8.5	-0.143622	-0.208717	0.0651
YPL078C	ATP4	10.6	11.1	10.2	10.6	0.455826	0.390782	0.06504
YDL058W	USO1	9.8	9.7	10.1	9.9	-0.093802	-0.158835	0.06503
YOR164C	GET4	9.6	9.5	9.2	9.1	-0.036796	-0.101773	0.06498
YDR505C	PSP1	9.5	9.5	9.9	9.8	-0.022497	-0.087406	0.06491
YBR231C	SWC5	7.7	7.7	7.4	7.4	0.050247	-0.014509	0.06476
YMR093W	UTP15	8.6	8.5	9	8.8	-0.103746	-0.168457	0.06471
YPL107W		6.4	6.6	6.3	6.5	0.228631	0.164	0.06463
YPL184C	MRN1	9.4	9.4	10.1	10.1	0.027407	-0.037157	0.06456
YER025W	GCD11	11.9	12	11.3	11.3	0.080056	0.015504	0.06455
YDL130W	RPP1B	13.7	14.1	12.7	13	0.373724	0.309209	0.06451
YKR028W	SAP190	8.7	8.7	10	9.9	0.006398	-0.058092	0.06449
YMR088C	VBA1	7.5	7.4	8.5	8.3	-0.096522	-0.160984	0.06446
YDR004W	RAD57	5.6	4.9	7.5	6.8	-0.629984	-0.694421	0.06444
YLR344W	RPL26A	12.9	13.1	11.8	11.9	0.164544	0.100195	0.06435
YLR072W		7.6	7.7	8.2	8.2	0.05332	-0.010989	0.06431
[truncated: 3,038 more rows]

## Sheet: Context_score
YORF	Gene	5_UTR_length		Context -6 to +6	Context_score
YDL090C	RAM1	8		AAGCGTATGCGA	0.161309
YOR149C	SMP3	61		AAGTGTATGATG	0.166556
YJR011C		45		AGGCGTATGAGT	0.169061
YNL176C		179		CATCGTATGAAC	0.175389
YPL096C-A	ERI1	42		AAGCGCATGAGA	0.175401
YLR007W	NSE1	14		TGGCGAATGGAG	0.17596
YOR221C	MCT1	52		GTTTGTATGAAG	0.17669
YBR163W	EXO5	102		TATCGTATGCTG	0.177032
YMR294W	JNM1	27		TGGTTGATGAAC	0.186813
YKR016W	FCJ1	46		ATTCGTATGATG	0.187392
YIL022W	TIM44	109		CAGTTCATGCAC	0.190967
YJL078C	PRY3	73		ACGCTTATGCTG	0.191183
YLR132C		27		TGGCCTATGGAA	0.192628
YIL046W	MET30	59		AAGGGCATGAGG	0.19332
YDL138W	RGT2	176		GCTTGTATGAAC	0.193463
YFR029W	PTR3	64		GCGTTCATGCAC	0.201366
YBR042C	CST26	45		AAGCTGATGCTG	0.202229
YGR147C	NAT2	63		GGGGTGATGATG	0.202392
YHR070W	TRM5	18		CATTGCATGAAA	0.202564
YNL320W		65		GGTCTCATGTTG	0.204002
YIL113W	SDP1	37		TCTCGCATGAAC	0.204581
YJR062C	NTA1	17		CAGTGAATGCTA	0.204733
YPR002C-A		356		TTGTTGATGAAG	0.205899
YNL234W		33		TTGTGTATGACA	0.206479
YCR007C		660		ATCTGCATGCAG	0.21141
YKL004W	AUR1	356		TTGCGTATGGCA	0.214543
YDL049C	KNH1	176		AAACGTATGCTG	0.214769
YKR019C	IRS4	111		AGGAGTATGAGA	0.215522
YHL004W	MRP4	88		TTTCTCATGCAG	0.216869
YER005W	YND1	41		CCTCTTATGCTC	0.216971
YDR513W	GRX2	22		TGTTTCATGGAG	0.21778
YNL278W	CAF120	116		GCTCTTATGCGA	0.2181
YGL169W	SUA5	59		AATTGTATGTAC	0.218207
YDL197C	ASF2	14		GTGCTTATGCCA	0.218586
YJR131W	MNS1	49		GATTCTATGAAG	0.219337
YMR310C		37		AGTTTGATGAGC	0.219412
YHL028W	WSC4	69		AAACGCATGCAG	0.220016
YAR033W	MST28	60		TTGGCTATGCAG	0.221161
YPL038W	MET31	28		GTGCATATGAAA	0.222456
YMR049C	ERB1	34		AGGTCAATGATG	0.222523
YLR371W	ROM2	198		GCGGTTATGAGC	0.222709
YOL119C	MCH4	36		CGGAGGATGTTG	0.223052
YGR091W	PRP31	69		GACCTTATGAGC	0.2252
YBR055C	PRP6	7		CATTTTATGGAG	0.225314
YGR042W		19		CAGAGTATGCTC	0.225439
YNL213C	RRG9	88		CTTGGCATGAAC	0.225888
YNL246W	VPS75	7		CTGCCAATGATG	0.226074
YNL306W	MRPS18	26		CGTGTGATGCTG	0.226837
YFR025C	HIS2	24		GAGGTCATGCAC	0.227063
YDR198C	RKM2	27		TTGCGAATGGAA	0.227261
YLR139C	SLS1	423		AAGCATATGTGG	0.227707
YNL053W	MSG5	120		GTGCACATGCAA	0.227891
YDR439W	LRS4	87		TGCCGCATGACA	0.227965
YKL213C	DOA1	38		TGGAGTATGGGA	0.228004
YFL048C	EMP47	22		TATTTTATGATG	0.228152
YOR114W		228		ATTCGAATGAAG	0.228359
YKL162C		109		GATTGAATGATG	0.228543
YNL227C	JJJ1	56		TAACGGATGAAG	0.228743
YJL102W	MEF2	42		GAGGCTATGTGG	0.228789
YOR279C	RFM1	111		GTGCGAATGAGT	0.229926
YIL107C	PFK26	168		AAGCTCATGTTC	0.230453
YIL042C	PKP1	19		GGTAGTATGTGG	0.230526
YNR049C	MSO1	18		ACGCATATGATG	0.230606
YHR151C	MTC6	168		CACGGTATGTGG	0.230818
YHL039W	EFM1	52		TTCTGCATGATC	0.231158
YAL021C	CCR4	44		CCGCTAATGAAC	0.231449
YLR073C	RFU1	120		TAGGTCATGAAG	0.231657
YOR110W	TFC7	83		CATTTTATGGTG	0.232131
YOR188W	MSB1	96		TTGGTTATGAAC	0.23231
YGR141W	VPS62	20		AGCTTCATGCGA	0.233049
YLR078C	BOS1	53		GGGGGAATGGTA	0.233685
YOR023C	AHC1	77		CTCCTCATGATG	0.2337
YGL003C	CDH1	103		AGTTGCATGTCC	0.233993
YOL019W		142		AAGGCTATGAAG	0.234105
YNL121C	TOM70	48		TTGCCAATGAAG	0.234425
YOR129C	AFI1	78		TACCGGATGTTG	0.234554
YCR079W	PTC6	27		AATTTGATGCGG	0.234726
YEL062W	NPR2	13		CGGCAAATGCTA	0.234892
YOL113W	SKM1	179		CTTTCGATGAAG	0.235478
YJL164C	TPK1	219		TTGGGTATGTCG	0.235723
YPR067W	ISA2	28		GAAGGTATGCAG	0.236226
YHR154W	RTT107	52		CGATCCATGAGC	0.236323
YDR514C		61		TATTGTATGAGT	0.236323
YJR057W	CDC8	7		TTTTGAATGATG	0.239537
YKR061W	KTR2	82		AGCTTCATGCAA	0.239943
YDR313C	PIB1	19		AAGCGCATGGTT	0.239981
YBL055C		60		AGTTATATGTGG	0.240328
YJR044C	VPS55	92		ACGGTTATGATG	0.240356
YPR157W		51		TAGCGAATGCAT	0.240829
YCL012C		34		ACGAGTATGAAG	0.241862
YBR044C	TCM62	33		ACGAGTATGCTG	0.241862
YPR048W	TAH18	24		CGCTGCATGTCA	0.241871
YDL042C	SIR2	68		AGCTGGATGACC	0.242844
YDR144C	MKC7	140		AGCTCTATGAAA	0.243143
YOL065C	INP54	27		GACCGAATGAAC	0.243431
YJL051W	IRC8	75		TCTCTTATGTGC	0.243942
YPR191W	QCR2	60		ACGTTGATGTTG	0.244308
YIL126W	STH1	82		GCGCGAATGCTT	0.244898
YDL115C	IWR1	37		TCGGGAATGAGC	0.24507
YPL244C	HUT1	22		ATTTGTATGGCG	0.24512
YMR055C	BUB2	29		TTTTGCATGACC	0.245186
YLL003W	SFI1	10		TAGGTTATGGGC	0.245252
YGL154C	LYS5	20		CCGTGGATGGTT	0.245318
YLR254C	NDL1	101		TTTCCTATGGTG	0.246094
YLR023C	IZH3	193		AAGTACATGATG	0.24611
YHR050W	SMF2	183		TGTTTGATGACG	0.246216
YKL105C		199		AGCGGGATGATC	0.246245
YHR035W		33		GTGCCTATGTGT	0.246334
YNL077W	APJ1	148		CGGAGAATGCAA	0.246357
YDL048C	STP4	50		TCCCCTATGCTG	0.246579
YGR231C	PHB2	89		GTGCTGATGAAT	0.246736
YNL244C	SUI1	33		AATCGTATGTCC	0.247232
YLL054C		28		CTGGATATGAGC	0.247279
YKR089C	TGL4	77		GTCTGAATGAGC	0.247333
YMR301C	ATM1	39		CTGCAAATGCTG	0.247484
YBR150C	TBS1	22		GTGTGAATGAAT	0.247636
YNL212W	VID27	60		TGACTGATGAAC	0.248179
YMR077C	VPS20	67		TATCGAATGGGC	0.248346
YLR253W		73		TAGTAGATGATG	0.248357
YLR001C		31		CCTTTGATGAAC	0.24837
YGR007W	ECT1	31		GACTGGATGACG	0.248549
YML005W	TRM12	7		GCGTGAATGAGT	0.248823
YOR037W	CYC2	75		AGTAGCATGCTG	0.248956
YNL074C	MLF3	46		GACGGTATGTGC	0.249007
YGL016W	KAP122	56		TTTTTGATGAGC	0.249115
YCR042C	TAF2	23		GACTTCATGATG	0.249182
YNR014W		12		CGTTCCATGTCG	0.250034
YBL060W	YEL1	18		AGAGGTATGTGC	0.25025
YLR421C	RPN13	37		GTGTTGATGAGT	0.25069
YOL124C	TRM11	28		GGCAGCATGAAG	0.250744
YOL082W	ATG19	270		TGGTAAATGAAC	0.250937
YOR189W	IES4	21		TGTGGTATGTCC	0.251718
YCR020W-B	HTL1	32		TATCGTATGTCA	0.251718
YAL013W	DEP1	34		TGGCAGATGAGT	0.252092
YPR062W	FCY1	29		TAGCTAATGGTG	0.252882
YIR036C	IRC24	26		AGGGATATGGGC	0.252901
YDR248C		66		CAGTTGATGACA	0.252914
YJR005W	APL1	42		TCGCTTATGTCC	0.252924
YDL121C		11		CGGAGCATGAAT	0.253198
YPL215W	CBP3	29		CACTTGATGATG	0.253471
YLR455W		236		AAGTTTATGACA	0.253685
YOR205C	GEP3	8		GCGGGAATGTTG	0.253915
YKL108W	SLD2	194		AGTTCGATGTAC	0.2541
YPL209C	IPL1	78		AAGGGAATGCAA	0.254444
YLR454W	FMP27	116		ATGTAGATGATG	0.255171
YER167W	BCK2	290		TAGCACATGCCG	0.255692
YDR301W	CFT1	59		GGCCCTATGAAT	0.256135
YLR095C	IOC2	29		CGATCGATGAGA	0.256315
YCR030C	SYP1	85		CCTCTCATGACG	0.256438
YGR286C	BIO2	119		TGCAGTATGATG	0.256538
YNL029C	KTR5	45		TAGCAGATGTTG	0.257251
YNR052C	POP2	94		AGGATTATGCAA	0.257555
YDL146W	LDB17	191		TGACTCATGATA	0.257972
YGR116W	SPT6	51		CCTTTTATGGAA	0.258071
YNR069C	BSC5	477		TTCTTTATGCAA	0.258119
YOR116C	RPO31	207		AATTCGATGAAG	0.258466
YER050C	RSM18	47		AACGGTATGCAA	0.258707
YNL152W	INN1	26		TGTCGAATGTCC	0.258979
YDR316W	OMS1	23		GTGAGGATGATC	0.259058
YJL042W	MHP1	68		TGCTCCATGGAC	0.259522
YCR068W	ATG15	154		TATTGAATGTTG	0.259549
YMR025W	CSI1	12		GGGTAAATGGAC	0.260235
YER074W-A	YOS1	11		GGGGATATGGTA	0.260592
YLR026C	SED5	115		ACTCCCATGAAC	0.260928
YDR204W	COQ4	12		AAGAGTATGTTG	0.26099
YNR009W	NRM1	84		CCGTTCATGTCC	0.261388
YMR264W	CUE1	46		TTGGCCATGGAG	0.261389
YLR024C	UBR2	168		GCACGCATGGAA	0.262058
YFL047W	RGD2	8		GCGAGCATGCTA	0.262453
YGR004W	PEX31	60		GATAGTATGAGC	0.262675
YDR213W	UPC2	214		AGCAGTATGAGC	0.262998
YDR113C	PDS1	85		ACCTTTATGATG	0.263018
YBR237W	PRP5	56		TGAGGTATGGAA	0.26315
YPL179W	PPQ1	169		CTATTTATGAGA	0.26321
YMR006C	PLB2	58		ACGCAGATGCAA	0.263226
YMR012W	CLU1	99		ATCTCTATGAGC	0.263348
YLR320W	MMS22	6		AAGCTTATGGAT	0.263917
YDR041W	RSM10	8		TGGCCAATGCTT	0.264033
YLR183C	TOS4	47		GAAGGCATGAGC	0.264052
YLL039C	UBI4	97		TAGATTATGCAG	0.264116
YJL147C		81		TTGATTATGAGG	0.264289
YDL122W	UBP1	212		TTTTGTATGGAT	0.264467
YEL061C	CIN8	123		TGTTTGATGCCA	0.264598
YDR200C	VPS64	65		CTTGGCATGGTA	0.264612
YGL108C		35		CATAGTATGGGG	0.264656
YOL028C	YAP7	222		TGGATCATGAGA	0.264745
YAL030W	SNC1	22		TTGTCCATGTCG	0.264749
YML113W	DAT1	38		TGGGTGATGGCG	0.265253
YOR034C	AKR2	219		TTTCTTATGACC	0.265561
YER156C		16		GTCTGCATGAAT	0.265741
YJL200C	ACO2	23		GATTCGATGCTA	0.265741
YCL009C	ILV6	15		TTTCTAATGCTG	0.265782
YJL096W	MRPL49	41		ATTTTCATGCTA	0.265876
YHR078W		28		GACGGGATGGAG	0.265897
YBL022C	PIM1	127		TAGAGCATGCTA	0.265901
YPR101W	SNT309	25		GATTTGATGGAC	0.265988
YDR243C	PRP28	29		GGACGGATGGCA	0.266851
YML104C	MDM1	36		TATCGTATGCCT	0.267582
YGL085W	LCL3	39		ACTTATATGAGG	0.267664
YDR519W	FPR2	8		GTCTCGATGATG	0.268199
YNL073W	MSK1	17		TTGCCGATGAAT	0.268456
YBR133C	HSL7	159		TTGCATATGCAT	0.268558
YFR013W	IOC3	56		TTGTTTATGGAT	0.268706
YNL115C		21		CAGATCATGAAG	0.268825
YBR080C	SEC18	26		TTGAGTATGTTC	0.268855
YIL045W	PIG2	109		ATCCGTATGGCC	0.268988
YBR002C	RER2	16		GACGGTATGGAA	0.269028
YPL203W	TPK2	162		GTCGGTATGGAA	0.269028
YAR008W	SEN34	102		GTTTTTATGCCA	0.26912
YHR129C	ARP1	104		TAGCCAATGGAC	0.269687
YML031W	NDC1	42		AAGCAGATGATA	0.270073
YML032C	RAD52	40		TTGTTGATGAAT	0.270522
YDR388W	RVS167	51		GTGCACATGAGT	0.270612
YER032W	FIR1	56		CCGATTATGAGC	0.270874
YIL047C	SYG1	18		TATCAGATGAAG	0.271221
YCR015C		20		GAGGATATGAAA	0.27146
YHR113W		9		TTTTCTATGTTC	0.271618
YOR075W	UFE1	17		TAACTCATGATG	0.271802
YJL198W	PHO90	50		AGGATCATGAGA	0.272009
YHR121W	LSM12	80		TCGTCCATGAGT	0.272152
YNL330C	RPD3	55		GTGCAGATGGTA	0.272601
YHL031C	GOS1	25		CACCACATGAGC	0.273012
YLR363C	NMD4	79		AGGTTAATGACA	0.27303
YDL209C	CWC2	22		ATTTGGATGACA	0.273225
YMR165C	PAH1	119		TCGATTATGCAG	0.273231
YPL084W	BRO1	57		CTACTCATGAAA	0.273417
YKL053C-A	MDM35	86		TTTTATATGGGG	0.273718
YNL051W	COG5	6		GGAGGTATGACA	0.273774
YKL088W	CAB3	29		GGTGTGATGACG	0.274036
YKL015W	PUT3	98		AGTTTAATGGTG	0.274222
YLR186W	EMG1	57		TAGGTCATGGTC	0.274566
YGR086C	PIL1	81		TATAGTATGCAC	0.275131
YLR082C	SRL2	37		TTTTGGATGTCC	0.275452
YIL077C		17		AAGGTGATGTTG	0.275484
YBR265W	TSC10	23		TAGGTAATGAAG	0.275568
YKL207W	AIM27	31		CCGCAGATGTTA	0.275811
YGR113W	DAM1	62		TCACCTATGAGC	0.275957
YKL176C	LST4	346		GTTTATATGTTG	0.27615
YEL002C	WBP1	50		TTTAGGATGCGG	0.276287
YJL072C	PSF2	37		AGACGCATGTCA	0.276291
YOR160W	MTR10	68		TGCGTTATGGAC	0.276315
YHR062C	RPP1	34		CCGAGAATGCTG	0.276647
YOR308C	SNU66	24		TAATTTATGAAC	0.276754
YAR018C	KIN3	8		GTGAGTATGCAT	0.27687
YIL088C	AVT7	23		TAAGGTATGGAG	0.277257
YIL139C	REV7	21		AGCTTTATGAAT	0.277945
YDR481C	PHO8	55		AGCAGCATGATG	0.278187
YPR105C	COG4	73		GTTTTGATGGAA	0.278245
YPR010C	RPA135	57		GGTGAGATGAGC	0.278275
YMR287C	DSS1	36		CAGGTGATGGTA	0.278752
YNL258C	DSL1	8		TTGGATATGGAG	0.279319
YDR227W	SIR4	125		CAGCCAATGCCA	0.279497
YGR074W	SMD1	12		AAGATTATGAAG	0.279573
YLR332W	MID2	371		CATAGTATGTTG	0.279852
YKL106W	AAT1	100		GACTTGATGTTG	0.279941
YMR204C	INP1	13		AGTGGTATGGTT	0.279945
YKL149C	DBR1	20		TTGCTTATGACT	0.280096
YGR255C	COQ6	93		AGAGGCATGTTC	0.280161
YDL164C	CDC9	51		AATTACATGCGC	0.280534
YNL283C	WSC2	366		TGGAATATGCAC	0.28056
YNR027W	BUD17	69		GTGCCAATGACC	0.280575
YMR146C	TIF34	38		AGGAATATGAAG	0.280593
YDR352W		188		CTTTTCATGTCG	0.280969
YDR315C	IPK1	47		AGATCGATGCAA	0.281154
YLR427W	MAG2	94		CTTTTGATGGTA	0.281242
YHL014C	YLF2	21		TCGGATATGAAC	0.281372
YNR054C	ESF2	35		TTACGCATGAGT	0.281536
YKL133C		13		TTTAGTATGTGG	0.281851
YNL293W	MSB3	64		ATTAGCATGCAG	0.281886
YJL161W	FMP33	19		ATTCATATGCTA	0.281944
YML109W	ZDS2	53		AATTTTATGGTA	0.2821
YPR164W	MMS1	11		TTAGGTATGCTA	0.282418
YPL246C	RBD2	40		CGTGCTATGAAT	0.282728
YLR210W	CLB4	65		TGACAGATGATG	0.282838
YGL063W	PUS2	194		GTCGTTATGCTC	0.282937
YDL160C-A		28		GTGGTGATGTTA	0.283238
YGR083C	GCD2	27		ATTGCTATGAGC	0.283242
YNL056W	OCA2	25		GATGCTATGAAA	0.283284
YLR025W	SNF7	74		TAAGGCATGTGG	0.283329
YNL236W	SIN4	47		ATTAGTATGATG	0.283488
YGL083W	SCY1	68		GCAGGGATGATG	0.283847
YNR067C	DSE4	46		GCTAGTATGCAA	0.284077
YCR066W	RAD18	50		CTACTCATGGAC	0.284096
YGR217W	CCH1	53		AGTACTATGCAG	0.284216
YNL095C		166		CATCAGATGGTG	0.2843
YNL197C	WHI3	329		CTTAGCATGCAA	0.284338
YKL205W	LOS1	40		CGAGGAATGCTA	0.284519
YMR062C	ARG7	15		CATAGCATGAGA	0.284525
YLR239C	LIP2	15		AGCCCCATGTCG	0.284548
YCR083W	TRX3	35		GCTGTTATGTTG	0.284642
YBL018C	POP8	41		GTTGTGATGGGG	0.284739
YFL007W	BLM10	145		CCGCCAATGACC	0.284769
YMR212C	EFR3	142		TTTGCGATGCAG	0.284838
YHR117W	TOM71	32		GCTCTTATGGCC	0.284906
YDR217C	RAD9	34		AGGGCTATGTCA	0.28535
YDR027C	VPS54	123		TGGCCAATGTCA	0.28574
YDR489W	SLD5	9		TCGGTGATGGAC	0.285852
YGR215W	RSM27	51		CTTTCAATGAAC	0.285943
YPR061C	JID1	33		TTTGTTATGCTA	0.286016
YJR046W	TAH11	13		TGATTTATGAGT	0.286048
YOR158W	PET123	27		TGAAGTATGGGG	0.286186
YGR179C	OKP1	27		TACTGTATGGCA	0.286489
YMR281W	GPI12	74		AGTTAAATGAAG	0.286701
YJL049W		23		ATCTGAATGAAA	0.286859
YBL014C	RRN6	29		CTGAGCATGAGT	0.286877
YDR090C		114		GTATTCATGATC	0.28712
YER119C	AVT6	20		CATCATATGGTA	0.287648
YDR016C	DAD1	33		GTACATATGATG	0.287672
YLR097C	HRT3	81		GAGCAAATGATA	0.28774
YDR236C	FMN1	25		GTGTTGATGTTT	0.288131
YPR106W	ISR1	12		CACGCTATGAAC	0.28816
YER066W	RRT13	892		GCGCAAATGAAA	0.28893
YCR093W	CDC39	30		GATTACATGCTA	0.289066
YPL123C	RNY1	83		GTGTCAATGTTA	0.289182
YMR034C		208		TGCCAAATGAAG	0.289319
YJL073W	JEM1	120		CGAAGTATGATA	0.289445
YIL092W		78		TGCTTAATGGTG	0.289478
YDR350C	ATP22	28		ATTGGCATGTTA	0.289537
YGL002W	ERP6	10		TTGCCAATGTTA	0.289742
YOR377W	ATF1	15		GCTCTCATGAAT	0.28975
YPL252C	YAH1	44		CCCCCAATGCTG	0.289781
YPL071C		46		CATTCCATGAGT	0.289825
YJR006W	POL31	8		AGGGCAATGGAC	0.289855
YBR015C	MNN2	128		TTCAGTATGCTG	0.290471
YHR099W	TRA1	62		TTGCCGATGTCA	0.290527
YEL031W	SPF1	31		CGGTAAATGACA	0.291229
YBL079W	NUP170	53		TTGTTCATGTTT	0.291267
YLR319C	BUD6	71		AATTAGATGAAG	0.291504
YIL130W	ASG1	136		GGCGTTATGCCA	0.291887
YLR423C	ATG17	33		ACACCTATGAAC	0.291916
YOR195W	SLK19	70		TAATTCATGAAC	0.292094
YLR376C	PSY3	34		AATGGGATGGAA	0.292295
YPL100W	ATG21	53		AAGGATATGAAA	0.292326
YHR156C	LIN1	41		AAGGATATGAAA	0.292326
YIL063C	YRB2	45		GAGAGCATGAGT	0.292407
YOR336W	KRE5	25		TTGATTATGAGA	0.292614
YBR147W	RTC2	113		TCTGCCATGAAG	0.292803
YLR104W	LCL2	40		TGTAGTATGAGT	0.292973
YOR143C	THI80	74		ACTGCTATGAGC	0.293017
YDR371W	CTS2	60		GATCATATGGTA	0.293193
YLR336C	SGD1	41		GAGGCAATGCAA	0.293313
YDR393W	SHE9	26		TGCGTGATGTTG	0.293408
YCL057W	PRD1	8		TTGGAGATGCGA	0.293519
YBR131W	CCZ1	15		ACGGATATGAGA	0.293726
YER178W	PDA1	28		GTGCCAATGCTT	0.293866
YJL180C	ATP12	16		TACGGAATGCTG	0.294166
YFL042C		20		GTGGTGATGTCG	0.294301
YJR030C		59		GACGGGATGGAA	0.294394
YBR183W	YPC1	97		AGATTGATGGGA	0.294576
YBR098W	MMS4	19		AGTTAAATGAGC	0.294726
YPR037C	ERV2	47		GAAGGGATGAAA	0.294862
YEL058W	PCM1	16		GAGACGATGAAG	0.294919
YMR270C	RRN9	141		GTTTTGATGAGT	0.29505
YLR342W	FKS1	257		CAGACCATGAAC	0.295363
YCR017C	CWH43	29		CCAGTTATGCTG	0.295379
YLR426W		25		CTGGTGATGAAT	0.295393
YDR475C	JIP4	98		GGGGAAATGGTG	0.2955
YPL176C	TRE1	27		AAGGATATGGTG	0.295667
YNL168C	FMP41	34		AACGTTATGAGC	0.295931
YER051W	JHD1	16		GGTGCAATGCAA	0.295933
YDR057W	YOS9	25		GTTTCAATGCAA	0.295933
YLR100W	ERG27	27		GATAGGATGAAC	0.295944
YMR282C	AEP2	44		TGATTAATGTGG	0.296174
YOR154W	SLP1	50		GTCCGAATGGCG	0.296301
YOR148C	SPP2	41		TGTAGAATGAGC	0.296305
YGR038W	ORM1	138		TAGTTAATGACC	0.296336
YAR003W	SWD1	85		TTCGTTATGAAC	0.296547
YLR090W	XDJ1	22		TTTTGAATGAGT	0.2967
YLR019W	PSR2	306		CATCAGATGGGA	0.296747
YMR134W		39		GCCGGTATGTCG	0.297002
YDR240C	SNU56	20		AGTATCATGCGC	0.29705
YNL165W		77		ATCCGCATGGAT	0.297344
YDR466W	PKH3	95		TGACATATGACG	0.297346
YCR065W	HCM1	183		TTTTCAATGATG	0.297353
YDL012C		17		CATCTCATGTCA	0.297377
YLR143W		11		AGTATCATGAAG	0.297705
YJL099W	CHS6	88		GCCCTTATGAAT	0.297758
YDL098C	SNU23	10		AAGCTAATGTCG	0.297969
YLR256W	HAP1	295		GGTTAGATGTCG	0.298014
YDL205C	HEM3	184		CGTACTATGGGC	0.298082
YGL090W	LIF1	32		GGTGCTATGTCC	0.298132
YOL061W	PRS5	57		GTCTGGATGTCA	0.298178
YDR501W	PLM2	117		TTGGTTATGTCC	0.298342
YGR221C	TOS2	87		GCGTCCATGTTT	0.298441
YHL044W		33		AAGGCTATGAGT	0.298744
YGL107C	RMD9	19		GGGACAATGATG	0.298835
YLR250W	SSP120	44		GTGGAAATGAGG	0.298979
YAL010C	MDM10	23		ATCTTGATGCTA	0.298987
YNR028W	CPR8	87		TTCCCAATGAAG	0.299248
YBR243C	ALG7	44		GACTATATGTTG	0.299511
YCR020C-A	MAK31	8		AGCGTCATGGAC	0.299632
YDL106C	PHO2	52		TACGCTATGATG	0.299658
YKR021W	ALY1	69		GACTACATGCTC	0.299709
YJR122W	IBA57	67		CTGGACATGTTC	0.299963
YJL194W	CDC6	38		ACGTTCATGTCA	0.300127
YDR140W	MTQ2	14		TGAAGTATGCTA	0.300137
YIL124W	AYR1	31		AAGAGTATGTCG	0.300247
YNL238W	KEX2	282		TATCAGATGAAA	0.300289
YDR321W	ASP1	31		CGTATCATGAAA	0.300295
YOR039W	CKB2	162		CAGATCATGGGC	0.300376
YLR383W	SMC6	82		AATGGTATGATT	0.300443
YKL017C	HCS1	8		AGGGAAATGAAC	0.300758
YEL043W		37		GCATGGATGCCA	0.300826
YDR075W	PPH3	174		GGAGATATGATG	0.300928
YBR105C	VID24	23		TGAGTCATGATC	0.300932
YMR030W	RSF1	176		GCAGTTATGAAG	0.301073
YER152C		31		GCGGTAATGAAA	0.301145
YBR122C	MRPL36	33		CTCCTAATGTTG	0.301223
YER046W	SPO73	666		AGATATATGGGC	0.301286
YOR172W	YRM1	44		TTGTTAATGAGT	0.301455
YPR086W	SUA7	33		CGCAGAATGATG	0.301485
YNL193W		24		CAGGTAATGGGA	0.301503
YDL133W		135		AATTTAATGGGG	0.301573
YNL317W	PFS2	11		CACGTTATGGAC	0.301719
YDL206W		149		AAGCAGATGCAT	0.301944
YIL145C	PAN6	9		GAATTGATGAAA	0.302264
YML058W	SML1	22		CCCGCTATGCAA	0.302684
YCL032W	STE50	77		AATCAGATGGAG	0.30289
YJL131C	AIM23	31		GTGGATATGTTA	0.303038
YJR033C	RAV1	28		GTTCTCATGTCA	0.30311
YNR039C	ZRG17	43		AGAGCTATGGAG	0.30314
YLR072W		20		TGTAGAATGTGG	0.303344
YOL022C	TSR4	30		TATCTCATGTCC	0.303696
YLR268W	SEC22	48		GTAGGGATGATA	0.303783
YPR024W	YME1	175		TGATAGATGAAC	0.303954
YOL023W	IFM1	8		TAGATCATGCTC	0.303961
YML023C	NSE5	44		CTGAGTATGGAT	0.304182
YGL208W	SIP2	50		GTTTCTATGGGT	0.304233
YMR190C	SGS1	164		GCGGTAATGGTG	0.304587
YDR011W	SNQ2	325		AATTCAATGAGC	0.304841
YGL248W	PDE1	64		CTTTTTATGGTT	0.304988
YOR297C	TIM18	26		TTGGTAATGCTA	0.305101
YLR285W	NNT1	6		AAACGTATGTCA	0.305376
YPR051W	MAK3	22		CAGGACATGGAA	0.305525
YGR013W	SNU71	23		CAGAACATGAGG	0.305694
YLR182W	SWI6	33		GAGAGGATGGCG	0.306062
YKL029C	MAE1	37		ACGGTTATGCTT	0.30652
YBR161W	CSH1	227		TACGTGATGAAG	0.306603
YDR470C	UGO1	91		CCCCCAATGAAC	0.306704
YGR157W	CHO2	253		CTGTAGATGTCC	0.306712
YMR126C	DLT1	189		CAGTAGATGTCC	0.306712
YML080W	DUS1	124		CTGCATATGACT	0.306964
YKR055W	RHO4	51		TTTTTCATGAAT	0.307084
YDR348C		199		TTTAGCATGGAG	0.307233
YGR110W	CLD1	51		CTTTTAATGTTC	0.307493
YKL196C	YKT6	47		TTGGCAATGAGA	0.307624
YGL139W	FLC3	314		ACAGGCATGAGA	0.307718
YMR115W	MGR3	48		TTCGGTATGCTT	0.307844
YKL092C	BUD2	76		CATATTATGAGC	0.308169
YDR030C	RAD28	8		AGGTCAATGGAT	0.308451
YOR016C	ERP4	138		GGAATTATGCGC	0.308607
YKL087C	CYT2	99		CATATTATGATG	0.308848
YDR462W	MRPL28	54		TAACACATGCTG	0.308877
YNL252C	MRPL17	20		AGTACCATGAAG	0.309045
YMR155W		22		AGTGCCATGGTA	0.309077
YLL026W	HSP104	56		GAATATATGAAC	0.309149
YDL108W	KIN28	32		GAACATATGAAA	0.309149
YMR243C	ZRC1	111		AGAGTCATGATC	0.309189
YLR353W	BUD8	481		TGAAGTATGATA	0.309217
YJL162C	JJJ2	49		ATTCTTATGTCA	0.309267
YFR037C	RSC8	30		AGGATAATGAGC	0.309315
YPL253C	VIK1	47		TACTTTATGGCG	0.309425
YDR266C		216		ATTAGGATGAGC	0.309536
YJR049C	UTR1	18		CTTGAGATGAAG	0.309804
YBL066C	SEF1	39		CTCGTCATGGTG	0.309975
YKR086W	PRP16	24		TCTGGTATGGGT	0.309987
YCR024C	SLM5	19		CAGCTAATGTTT	0.310035
YNL119W	NCS2	8		CAAGTTATGGAG	0.310348
YOL159C-A		89		GCACATATGCAA	0.310426
YDL234C	GYP7	143		CCCCTGATGAGT	0.310486
YLR373C	VID22	16		GCACATATGAGA	0.31063
YKL138C-A	HSK3	22		AAGAGAATGAAC	0.310666
YLR077W	FMP25	27		CCGCTAATGTCA	0.310935
YLR401C	DUS3	42		TTATTGATGGAG	0.311016
YER008C	SEC3	52		TATATTATGAGG	0.311055
YLR323C	CWC24	27		GTATTCATGTTC	0.311107
YJR141W		33		AGGGTGATGGTT	0.31125
YKR063C	LAS1	6		AATCTAATGATA	0.311489
YLR099C	ICT1	100		AGTAGAATGTGG	0.311668
YMR066W	SOV1	7		TAACTCATGTTC	0.311709
YLR177W		49		GGTACCATGGAG	0.311937
YDR232W	HEM1	251		TTCAGTATGCAA	0.312157
YBR199W	KTR4	99		ACTGATATGAGG	0.312237
YMR199W	CLN1	198		AAGATCATGAAC	0.312301
YJL029C	VPS53	61		AGGACAATGCTG	0.312354
YPL191C		49		CTTTTCATGGAT	0.31244
YBL102W	SFT2	88		GAGAATATGAGC	0.312465
YDR416W	SYF1	63		TATCCTATGTCA	0.312474
YKR004C	ECM9	48		GAAGTTATGCAA	0.312756
YAL014C	SYN8	53		CACGGTATGGAT	0.313212
YLR404W	FLD1	37		GGAAGGATGAAA	0.313361
YLR245C	CDD1	18		AAGGTAATGAAA	0.313473
YPL151C	PRP46	26		GTGAGAATGGAC	0.313573
YLR120C	YPS1	113		CCACATATGAAA	0.31377
YHR004C	NEM1	121		AATTGAATGAAT	0.313858
YOR147W	MDM32	37		AAATTCATGCTA	0.313938
YCR082W	AHC2	30		ACTGGAATGATC	0.314348
YHR138C		72		ATATATATGAAG	0.314542
YHL009C	YAP3	60		ATTGTTATGACG	0.314581
YGR252W	GCN5	48		CATTAGATGGTC	0.314769
YLR128W	DCN1	44		CAGGACATGGTA	0.314769
YPL063W	TIM50	124		CTTGCAATGCTG	0.315156
YDL189W	RBS1	229		TAGGTGATGACA	0.315185
YIR011C	STS1	16		AGCATTATGATG	0.315189
YOR030W	DFG16	96		AGATTAATGATC	0.315291
YJL127C	SPT10	68		GCTTCAATGCTA	0.315409
YLR035C	MLH2	22		TTTTGGATGACT	0.315572
YDR107C	TMN2	15		TCGGTAATGAAA	0.315632
YMR048W	CSM3	25		GAGGTCATGGAT	0.315643
YHR150W	PEX28	42		CAGCAAATGAGT	0.315818
YLR258W	GSY2	67		TTTTGAATGTCC	0.316028
YER149C	PEA2	51		TTTCATATGCAT	0.31608
YDL095W	PMT1	30		ACGGTCATGTCG	0.316217
YDR026C		143		GGTAGAATGGAC	0.316374
YHR031C	RRM3	41		ATCCCGATGTTC	0.316627
YPL060W	MFM1	239		GTACACATGAGA	0.31691
YPR085C	ASA1	87		GAACACATGAGA	0.31691
YNL230C	ELA1	63		CGAGATATGAAA	0.317278
YLR288C	MEC3	18		AGTTAAATGAAA	0.317428
YDR133C		236		CCGTAAATGACG	0.317432
YHR028C	DAP2	17		TTACTCATGGAA	0.317489
YDR457W	TOM1	114		ATATTCATGGTG	0.317526
YNL253W	TEX1	32		TTCGGCATGTCG	0.317583
YGL175C	SAE2	59		TGTGAGATGGTG	0.317717
YIR010W	DSN1	68		TAGAGGATGAGT	0.317758
YJR089W	BIR1	136		GGGATTATGGAT	0.31783
YML088W	UFO1	58		GACAGCATGGAG	0.31793
YGL255W	ZRT1	45		GGAATTATGAGC	0.317944
YGL105W	ARC1	23		GAGTCAATGTCC	0.318026
YPL193W	RSA1	42		TGGACTATGAAT	0.318148
YDR249C		58		GTGGCCATGGGT	0.318253
YDR435C	PPM1	12		GTCGCCATGGAG	0.318354
YNL039W	BDP1	18		GTATTTATGAGT	0.318368
YKR054C	DYN1	65		TAGGCAATGTGC	0.318641
YJL011C	RPC17	40		AACGTTATGAAA	0.318725
YMR094W	CTF13	10		CGCTTGATGCCT	0.318781
YDR319C		79		AAGATTATGATA	0.318901
YHR100C	GEP4	54		CTAGTCATGAAC	0.318949
YFL004W	VTC2	90		TTTGACATGCTG	0.319214
YKR051W		117		ATTGTTATGGAA	0.319413
YMR277W	FCP1	119		CAGATTATGACC	0.319516
YPL132W	COX11	150		ATTGTCATGATA	0.319536
YDL085W	NDE2	294		GTATAGATGCTG	0.319631
YPL087W	YDC1	51		AATCAAATGCTG	0.319712
YOL088C	MPD2	22		AAGGAGATGAAA	0.319888
YGR168C		41		AACTATATGAAA	0.319888
YNL005C	MRP7	45		GAGAATATGTGG	0.319888
YLL041C	SDH2	77		ATAGGGATGTTG	0.320152
YMR150C	IMP1	396		CCAGGGATGACG	0.320367
YAR028W		56		TTGACCATGCAA	0.320387
YDR264C	AKR1	68		TAATTGATGGTG	0.320426
YGL100W	SEH1	37		CTGAATATGCAA	0.320472
YLR057W		54		AACCTTATGTCC	0.320654
YDR182W	CDC1	53		GGAAGTATGGTA	0.320675
YPL158C	AIM44	70		TACGGAATGATC	0.320765
YGR003W	CUL3	28		TACTATATGATA	0.320765
YOR229W	WTM2	88		TAGAGGATGGCG	0.320785
YPR143W	RRP15	38		TTGATCATGGGC	0.320895
YLR018C	POM34	56		GGAACTATGAAG	0.321069
YMR130W		76		GGCTCAATGACC	0.321179
YMR026C	PEX12	116		CAAGTGATGAGC	0.321191
YDR292C	SRP101	132		TTGATTATGTTC	0.3215
YMR023C	MSS1	16		CTATTTATGAAT	0.321586
YOL020W	TAT2	66		TCTCATATGACC	0.321647
YJL036W	SNX4	119		GAGGATATGACA	0.321741
YDL238C	GUD1	28		GAGGATATGACA	0.321741
YOR319W	HSH49	24		ACATTGATGAAC	0.321898
YMR297W	PRC1	72		TACGCTATGAAA	0.32203
YGR024C	THG1	64		AGCGGGATGGCA	0.322103
YDR151C	CTH1	116		CTAGCCATGATG	0.322294
YML053C		83		CGTGAAATGCTC	0.322494
YOR060C		27		CTTTTGATGTCA	0.322535
YDR356W	SPC110	27		ACACTCATGGAC	0.322593
YLL049W	LDB18	12		AGTTTGATGCCT	0.322609
YER029C	SMB1	66		TAACTAATGAGC	0.322612
YGL224C	SDT1	102		GGCTTCATGACT	0.322869
YDR259C	YAP6	455		GGACAAATGCAA	0.322952
YER048C	CAJ1	76		GGGAATATGGTA	0.32306
YBR230W-A		48		ACTAGCATGAGA	0.32308
YJR144W	MGM101	21		CGTACGATGAAA	0.323212
YHR036W	BRL1	119		TTCCATATGGAA	0.323506
YOR119C	RIO1	44		AAGGTCATGTCC	0.323518
YNL275W	BOR1	17		CAAGGCATGTCG	0.323635
YGL222C	EDC1	78		CAAGGCATGTCG	0.323635
YKL041W	VPS24	94		CTTTTGATGGAT	0.323944
YNL256W	FOL1	52		TTGGCTATGTCA	0.323979
YCR094W	CDC50	63		TTGTATATGGTT	0.324116
YKR010C	TOF2	83		AAGTAAATGATA	0.324136
YAL058W	CNE1	49		AGTACTATGAAA	0.324198
YLR299W	ECM38	193		ACAGTTATGCTG	0.324215
YJR073C	OPI3	24		CAAGCGATGAAG	0.324348
YJL060W	BNA3	17		CTCTCAATGAAA	0.324425
YOL095C	HMI1	33		AGACAGATGGAC	0.324492
YDR539W	FDC1	32		ATTTAAATGAGG	0.324836
YOR107W	RGS2	291		TGCCAGATGGCG	0.324866
YNL092W		84		TTGACTATGGAC	0.324961
YKL028W	TFA1	44		TAGAGTATGGAT	0.324961
YBR202W	MCM7	65		CAGATTATGAGT	0.325036
YPL055C	LGE1	10		TAAAGTATGAGC	0.325079
YDL150W	RPC53	96		TTAAGTATGAGC	0.325079
YBL031W	SHE1	30		TCATGGATGAAT	0.325236
YMR187C		22		TTTTATATGACC	0.325243
YOL114C		17		TATCATATGACA	0.325243
YLR309C	IMH1	13		GATTCAATGTTC	0.32536
YHL040C	ARN1	186		GTACTAATGGAG	0.325455
YDR392W	SPT3	41		GCAGGAATGATG	0.32566
YNL011C		34		TACTAGATGAAC	0.325693
YDR221W	GTB1	13		TTCGCTATGGTG	0.325711
YML079W		9		GAGAGCATGTCA	0.325808
YLR050C		21		GAGATAATGAAG	0.325946
YML020W		176		GGTAGAATGGTC	0.325946
YOR159C	SME1	44		CTTGGAATGTCG	0.326042
YDR430C	CYM1	79		GTATATATGTTG	0.326069
YPR178W	PRP4	30		CGGAATATGAGT	0.326222
YBR290W	BSD2	7		AGCGCTATGCCA	0.326297
YGL125W	MET13	139		CGCAATATGAAG	0.326325
YDR454C	GUK1	16		TGCGTTATGTCC	0.326472
YGL022W	STT3	65		GCTGCCATGGGA	0.326537
YCR106W	RDS1	30		GCTCTGATGGAT	0.326537
YIL008W	URM1	46		ATCGGGATGGTA	0.326614
YBR070C	ALG14	21		AAGATCATGAAA	0.326692
YOR157C	PUP1	65		GTGAGCATGGCA	0.32683
YNL139C	THO2	96		GACTTTATGGCA	0.326863
YOR213C	SAS5	118		TCTTTTATGGAT	0.327169
YBR233W-A	DAD3	39		CACAGTATGGAA	0.32721
YBR129C	OPY1	45		AGACCAATGATA	0.327301
YOR350C	MNE1	33		AAGAATATGAAG	0.32732
YLR103C	CDC45	70		TCGCACATGTAT	0.327337
YJL035C	TAD2	53		CACACTATGCAG	0.327612
YDR367W	KEI1	43		TTAGTTATGAGA	0.328016
YOL036W		393		TTTGTCATGGAA	0.328114
YMR284W	YKU70	26		AATATTATGCGC	0.32832
YLR277C	YSH1	148		GCATATATGGAG	0.328443
YKR006C	MRPL13	11		ATGAGGATGTCG	0.328557
YNR036C	MRPS12	10		AGAGCCATGTTG	0.328592
YBL058W	SHP1	28		TTAGGTATGGCG	0.328612
YNR033W	ABZ1	6		AAAGGAATGCTG	0.329037
YDR007W	TRP1	10		TGGAGTATGTCT	0.329138
YGR196C	FYV8	59		TTTATTATGAGC	0.32922
YFL009W	CDC4	192		TGTACGATGGGG	0.329242
YCR021C	HSP30	100		TTTCAAATGAAC	0.329347
YAR002W	NUP60	42		CATCCAATGCAT	0.329359
YDR009W	GAL3	71		CATAGTATGAAT	0.329372
YML051W	GAL80	73		CCCGTCATGGAC	0.329433
YML018C		131		AGAGCCATGGTG	0.329622
YOR118W	RTC5	204		AGTATTATGGGA	0.3297
YPR017C	DSS4	10		GAGAACATGAGC	0.329784
YGR195W	SKI6	120		CATCATATGTCA	0.329881
YGL073W	HSF1	84		GGCGCCATGAAT	0.329882
YJR069C	HAM1	33		AGCAGAATGAGC	0.33019
YLR211C		50		GATGGAATGAGT	0.330223
YBR141C		11		AGCGGAATGCAT	0.330413
YMR252C		43		GTGTTAATGTTT	0.330575
YER142C	MAG1	28		GTCTCAATGAAA	0.330679
YLR241W		55		TACTGAATGACA	0.330913
YLR437C	DIF1	69		GACTTAATGGAC	0.330987
YIL067C		59		AATTGAATGGGT	0.331344
YDR498C	SEC20	35		AAGATTATGGTC	0.331357
YDR210W		8		AAACTAATGAGC	0.331464
YOR340C	RPA43	71		TGGATTATGTCA	0.33167
YCR028C	FEN2	118		TAAGTCATGATG	0.331676
YNL186W	UBP10	153		CAGACTATGACC	0.331687
YOR150W	MRPL23	27		CTATTCATGTCG	0.331759
YEL059C-A	SOM1	52		ACCCTCATGGCG	0.331826
YDL142C	CRD1	63		TAGTCAATGATT	0.331944
YBL078C	ATG8	44		AGAGACATGAAG	0.331976
YMR016C	SOK2	224		TTTGTCATGCCC	0.331978
YPR071W		27		GGAATTATGCAA	0.332378
YOL143C	RIB4	38		CGCAGTATGGCA	0.332454
YGR274C	TAF1	16		GGCGATATGGTA	0.332651
YKR042W	UTH1	207		TCCAGTATGAAA	0.332701
YAL056W	GPB2	51		ATAGGCATGGAA	0.332876
YEL053C	MAK10	83		CCGAGAATGGAA	0.332926
YLR414C	PUN1	110		ATAAGCATGAGG	0.33306
YKL146W	AVT3	21		GCGGATATGAAT	0.333255
YAL025C	MAK16	23		GAGGATATGTCC	0.333263
YPR107C	YTH1	84		TATGTAATGAGC	0.333408
YNL042W	BOP3	89		CGACCAATGAGT	0.333598
YCL017C	NFS1	94		TGGAAGATGTTG	0.333614
YDR159W	SAC3	91		CCTTAAATGAAC	0.333624
YMR313C	TGL3	38		TTAAGCATGAAG	0.333754
YKL119C	VPH2	43		ACTCTAATGTTC	0.333779
YJR099W	YUH1	117		AAAAGTATGAGC	0.333998
YMR089C	YTA12	199		GTACTAATGTTG	0.334254
YBR269C	FMP21	21		GAACTAATGTTG	0.334254
YNL136W	EAF7	20		GATGTGATGGTA	0.334402
YKL210W	UBA1	49		ATAGCTATGAGC	0.334443
YDR310C	SUM1	278		GCGGGGATGTCT	0.334514
YBL057C	PTH2	20		TTTTTAATGGAA	0.33459
YHL032C	GUT1	40		AGTTATATGTTT	0.334934
YMR139W	RIM11	230		CGCAGGATGAAT	0.335113
YNL076W	MKS1	272		GAACTGATGTCG	0.335161
YDR178W	SDH4	102		ATAGCTATGATG	0.33518
YLR348C	DIC1	27		GACGGCATGTCA	0.33548
YLL004W	ORC3	17		AACAGGATGAGC	0.335722
YBR135W	CKS1	94		AGTACTATGTAC	0.335808
YCR019W	MAK32	148		GTGATAATGATG	0.335808
YML081C-A	ATP18	59		ACTGCCATGTTG	0.335833
YMR224C	MRE11	50		TCGACTATGGAC	0.336177
YOL083W	ATG34	94		GACGCGATGAAA	0.336219
YER075C	PTP3	162		TAGAACATGAAG	0.336237
YDR506C		39		TTTAGAATGAAG	0.336237
YPL014W		34		TATAGAATGCTG	0.336237
YLR094C	GIS3	34		TATAGAATGCTG	0.336237
YPL166W	ATG29	41		ACTTTCATGATT	0.336275
YNR075W	COS10	9		TTGAATATGGGG	0.336328
YEL041W	YEF1	107		GAGAATATGAAA	0.336533
YJL012C	VTC4	20		ACAGCTATGAAG	0.336565
YPR198W	SGE1	55		TATGCAATGAAG	0.336685
YNL010W		39		AGGGAAATGGTC	0.336797
YNL083W	SAL1	30		GTCTAAATGCTG	0.336847
YFR002W	NIC96	15		AACGATATGCTG	0.337037
YKR058W	GLG1	181		ATGGGAATGTAT	0.337068
YGL148W	ARO2	35		AGAGGCATGTCA	0.337154
YBR158W	AMN1	263		CATTAAATGAAA	0.337355
YBR187W	GDT1	129		TATTCAATGGGA	0.337356
YOR296W		50		AAACTTATGAAT	0.337431
YBR248C	HIS7	59		AAGAGAATGCCG	0.337675
YGR012W		29		TCCTTTATGTCC	0.33774
YDR479C	PEX29	48		GTCTAGATGGAC	0.337761
YDR289C	RTT103	71		GACGGTATGCCT	0.337895
YOR097C		45		TCACGGATGGAT	0.33794
YFR017C		78		ACCCTCATGACA	0.338002
YKL132C	RMA1	136		AAGCAGATGGAT	0.338125
YGR250C		251		TCGAGGATGAAT	0.338449
YPL172C	COX10	128		CTTTAGATGAGT	0.338907
YHR152W	SPO12	31		GTATTTATGTCC	0.339107
YPL135W	ISU1	91		AACCTGATGCTT	0.339172
YNR013C	PHO91	43		ACTGACATGAAG	0.339292
YMR108W	ILV2	191		TTTCAAATGATC	0.339311
YDR362C	TFC6	110		GTGGCGATGGCA	0.339315
YEL005C	VAB2	40		CCTAGCATGGTA	0.339365
YPR171W	BSP1	36		GGAAGTATGACA	0.339402
YKL061W	BLI1	17		ATTGTGATGGGA	0.339488
YCR011C	ADP1	132		TACAGTATGGGA	0.339519
YLR457C	NBP1	9		GGTAATATGCTA	0.339539
YJR093C	FIP1	58		CTCTAAATGAGC	0.339727
YDL159W	STE7	46		TTGGTCATGTTT	0.339771
YMR022W	UBC7	29		CATAGCATGTCG	0.339791
YDL211C		69		TTCGCCATGCTA	0.339879
YDR175C	RSM24	47		AGGAAGATGAAA	0.339957
YPL189C-A	COA2	91		CATATCATGAGA	0.340238
YGL159W		7		ACTGATATGAAC	0.340248
YCR057C	PWP2	62		ATCCCAATGAAA	0.34041
YMR209C		33		GCGCCAATGGTT	0.340436
YGR096W	TPC1	47		GTTGATATGTTC	0.340949
YOR292C		44		CTGTAGATGCCT	0.341066
YER147C	SCC4	66		AAATTCATGGAA	0.341233
YBL006C	LDB7	8		CTGAGAATGAGT	0.341255
YDL226C	GCS1	23		TAGAGCATGTCA	0.341481
YHR197W	RIX1	17		TTGAGCATGTCA	0.341481
YNL191W	DUG3	62		TTCGTGATGTGC	0.341517
YDR318W	MCM21	16		CTGGCAATGAGT	0.341709
YLR248W	RCK2	55		TCTTCGATGCTT	0.341927
YHR135C	YCK1	121		TTCCCCATGTCC	0.341936
YJR134C	SGM1	41		TTTGCTATGAGT	0.342217
YHR037W	PUT2	56		GGAATTATGCTA	0.342434
YDL207W	GLE1	38		CGAAGAATGAGA	0.342588
YMR295C		55		GGCAATATGATG	0.34268
YJR078W	BNA2	386		GCCGATATGAAC	0.342691
YOL110W	SHR5	21		TACTAGATGTGC	0.342763
YBR039W	ATP3	87		GTAGTCATGTTG	0.34289
YDR296W	MHR1	53		AAAAGCATGAAG	0.342912
YIL023C	YKE4	15		AAAAGCATGAAG	0.342912
YOR073W	SGO1	71		TTGACCATGCCG	0.342973
YBL047C	EDE1	161		TAGGCCATGGCA	0.343008
YJL066C	MPM1	38		CTCGATATGGGC	0.343099
YOL125W	TRM13	61		CGAAGGATGTTA	0.343198
YOL034W	SMC5	27		CCTAGCATGACC	0.343361
YMR202W	ERG2	25		ATAGCCATGAAG	0.343369
YHR105W	YPT35	86		CAAGATATGAGC	0.343645
YER062C	HOR2	66		TTCGGAATGGGA	0.343838
YOR251C	TUM1	23		CATTCAATGCCA	0.344113
YMR218C	TRS130	45		TAGTAGATGGAT	0.34426
YGR175C	ERG1	27		AGGGTCATGTCT	0.344273
YNL145W	MFA2	41		ACCTTAATGCAA	0.344447
YLR314C	CDC3	65		GTTGCCATGAGT	0.344607
YPL053C	KTR6	72		GGTAAGATGCAC	0.344755
YOR201C	MRM1	41		TGTGTTATGACT	0.34485
YCL010C	SGF29	20		CTTATTATGGAC	0.34487
YML012W	ERV25	41		AAAAGGATGCAG	0.345097
YBR059C	AKL1	150		CTGATCATGTCG	0.345237
YOR101W	RAS1	74		AACGACATGCAG	0.345272
YHR147C	MRPL6	35		CAACCTATGTCA	0.345367
YMR078C	CTF18	13		GGGATCATGGTT	0.345595
YBR246W	RRT2	43		ATACATATGGAC	0.345914
YOL112W	MSB4	176		GACAGGATGATA	0.345931
YER144C	UBP5	9		AGCGTAATGGGC	0.346188
YLL035W	GRC3	102		ACCGCTATGGTG	0.346198
YPR045C	THP3	58		AACATTATGCAG	0.346399
YPR004C	AIM45	14		ATTTCTATGTTT	0.346428
YMR119W	ASI1	205		AAGAATATGAAC	0.346436
YIR001C	SGN1	52		GCTGTTATGTCC	0.34658
YER112W	LSM4	101		TTCTCAATGCTA	0.346587
YIL152W		13		AAGCAAATGAGT	0.346649
YGL143C	MRF1	31		GCAAGCATGTGG	0.346693
YLR386W	VAC14	22		TGGAACATGGAA	0.346874
YDR493W	MZM1	101		CACACTATGAGC	0.346972
YJL062W-A	COA3	29		AGTAGTATGGTT	0.347052
YHR167W	THP2	52		CATAGCATGACA	0.347201
YPR053C		1184		ATCGATATGATG	0.347235
YDR062W	LCB2	360		TAGATTATGAGT	0.347239
YNR034W-A		72		AATATCATGAAG	0.347281
YPL103C	FMP30	19		TTGCAAATGAAT	0.347372
YDR179W-A		93		GTGTAGATGCCT	0.347641
YJL055W		17		ACGGCGATGACA	0.347771
YKR060W	UTP30	27		TTTGGGATGGTT	0.347812
YHR033W		15		GGTGTAATGACA	0.348099
YLR117C	CLF1	12		GCCAGCATGGAC	0.348111
YBR022W	POA1	62		ACAGGTATGTCG	0.34819
YML061C	PIF1	150		TTTTACATGCCA	0.348544
YER052C	HOM3	82		TTTTACATGCCA	0.348544
YMR215W	GAS3	78		CTAGCGATGCAA	0.348563
YPR070W	MED1	41		TTGGAGATGGTA	0.348653
YPL109C		77		TGGGCAATGTCA	0.348684
YHR067W	HTD2	33		ATCAGCATGAAA	0.348741
YIL035C	CKA1	100		CGAACTATGAAA	0.348756
YGR210C		110		GCCAGTATGCCC	0.349092
YOR275C	RIM20	8		TGTGACATGAGT	0.349201
YKL034W	TUL1	101		TACAGTATGGAA	0.349562
YGL151W	NUT1	45		ATTGCCATGGAA	0.349959
YKL206C	ADD66	22		CATACGATGAGC	0.350072
YMR225C	MRPL44	21		TTCGCCATGATA	0.350162
YPL026C	SKS1	68		GTACAAATGCTG	0.350561
YBL103C	RTG3	254		TGAAGAATGATG	0.350639
YHR133C	NSG1	18		TTACTAATGGGC	0.35066
YPL043W	NOP4	57		AGTGAGATGGAA	0.350806
YBR239C	ERT1	149		ATCGTGATGTGC	0.350887
YJL143W	TIM17	46		AGCGTTATGTCA	0.350887
YPL047W	SGF11	117		GTTGCGATGACC	0.351228
YPL195W	APL5	13		ATTGTCATGACC	0.351407
YNL268W	LYP1	55		ATATATATGGGC	0.351459
YGR078C	PAC10	31		GTTATTATGGAC	0.351518
YGR031W		72		GGTACAATGATG	0.351714
YMR193W	MRPL24	75		AAGAATATGCAA	0.351758
YJL168C	SET2	93		GTGATCATGTCG	0.351892
YDR349C	YPS7	105		TTTGCTATGACA	0.351907
YGL116W	CDC20	146		AGACTAATGCCA	0.352064
YMR157C	AIM36	46		ACCTACATGTTG	0.352159
YML038C	YMD8	154		TTTGCTATGAAT	0.35234
YNL003C	PET8	32		TTTGCTATGAAT	0.35234
YLR212C	TUB4	15		CTATCTATGGGT	0.352435
YOR106W	VAM3	86		GAGATTATGTCC	0.352884
YPL005W	AEP3	33		ATATTTATGAAT	0.35298
YAL041W	CDC24	64		GAGATCATGGCG	0.352996
YNL116W	DMA2	61		GTGGAAATGTAC	0.353019
YBL054W	TOD6	115		CTCGCGATGACG	0.353114
YCL002C		25		ATTCACATGCTT	0.353123
YJL137C	GLG2	83		GGAGCTATGGCC	0.353129
YKL025C	PAN3	34		TACGCCATGGAC	0.353155
YCR043C		33		CAAAGGATGATC	0.353206
YMR316W	DIA1	64		CTGATTATGGGT	0.353295
YOR276W	CAF20	25		CACGACATGATC	0.353385
YDL180W		132		CTGAATATGGTC	0.353444
YDR083W	RRP8	22		TTTTATATGGCC	0.35352
YER124C	DSE1	40		AATATTATGCAA	0.353609
YBR217W	ATG12	64		GACAGTATGAGT	0.353661
YFR048W	RMD8	52		GACAGTATGAGT	0.353661
YER154W	OXA1	20		CCGACGATGTTC	0.353661
YDR476C		18		ACAAGTATGTGG	0.353734
YHR048W	YHK8	149		CAGGATATGGTT	0.353914
YGL058W	RAD6	60		AGCGTCATGTCC	0.354022
YOR386W	PHR1	14		CTGATAATGAAA	0.354053
YOR347C	PYK2	98		CTATCGATGCCA	0.354149
YDR422C	SIP1	46		GCCGCCATGGGA	0.354161
YMR268C	PRP24	42		GTGATAATGGAG	0.354284
YLR244C	MAP1	18		TGTATAATGAGC	0.354326
YBL007C	SLA1	52		TAGAGTATGACT	0.354345
YGL257C	MNT2	109		TCGAATATGAGA	0.354412
YIL154C	IMP2'	25		TACGCAATGCAG	0.354444
YPR031W	NTO1	26		CACCTAATGAAT	0.354525
YNL311C	SKP2	14		CGAATCATGAAA	0.354579
YLR375W	STP3	32		CGAGCGATGAGT	0.354817
YCL041C		488		CTTATAATGCGG	0.354818
YJL133C-A		15		TATTAAATGATC	0.354947
YDR267C	CIA1	60		TTGGTAATGGCG	0.355006
YFR042W	KEG1	48		TTGAGGATGGCA	0.355165
YHL019C	APM2	34		AAAGGCATGTCG	0.355229
YDR244W	PEX5	25		TAACACATGGAC	0.355337
YOR299W	BUD7	72		CCTCAGATGATT	0.355514
YPR018W	RLF2	90		GGGAAAATGGAG	0.355577
YCL031C	RRP7	33		TACGGGATGGGT	0.355638
YOR320C	GNT1	117		CCAATTATGAGG	0.355664
YJL071W	ARG2	45		TTTATCATGTGG	0.355723
YNL295W		137		TACGTCATGGAA	0.355872
YNR026C	SEC12	44		GCCACTATGAAG	0.355905
YNR044W	AGA1	117		TTTCAGATGACA	0.35591
YPL009C	TAE2	23		ATAGCGATGAAG	0.356012
YJL184W	GON7	41		ATCTCAATGAAA	0.356097
YBR170C	NPL4	50		TGAAGTATGCTT	0.356166
YGL060W	YBP2	130		ATTGATATGTAC	0.356374
YER078C	ICP55	208		GTTGATATGTTA	0.356661
YLR393W	ATP10	14		CTAACTATGCAG	0.356661
YML046W	PRP39	88		TTCGTTATGCCA	0.356875
YOL154W	ZPS1	47		AACATTATGAAG	0.35688
YLR105C	SEN2	25		AGGAGCATGTCT	0.356912
YDR510W	SMT3	85		CGAGCGATGTCG	0.357078
YJL010C	NOP9	37		GTTATTATGGGA	0.357152
YDL193W	NUS1	107		TCTTAGATGCCC	0.357381
YIR007W		13		GATCATATGCCT	0.357431
YHR144C	DCD1	32		ACGATTATGTTA	0.357469
YDR115W		40		GACGGAATGCCA	0.357486
YKR014C	YPT52	143		TAACAGATGTTG	0.357503
YBR160W	CDC28	78		TCGAACATGAGC	0.357578
YDR333C		37		TCGAACATGAGC	0.357578
YBR155W	CNS1	76		TCTAGAATGAGC	0.357578
YJL201W	ECM25	25		GCCAGGATGATA	0.357871
YJL176C	SWI3	63		GCAAGCATGGAG	0.358067
YML048W	GSF2	45		GCAAGCATGGAG	0.358067
YDR161W		23		AGGAATATGAGT	0.358069
YKR027W	BCH2	61		AGGAATATGAGT	0.358069
YDR160W	SSY1	178		AGGAATATGAGT	0.358069
YPR196W		29		AGGAATATGAGT	0.358069
YMR020W	FMS1	101		GTGAGAATGAAT	0.358123
YKL008C	LAC1	41		AGAGCTATGTCG	0.358166
YML128C	MSC1	124		AAGAAGATGAAG	0.358183
YNL080C	EOS1	172		AACCAGATGACG	0.358219
YHR188C	GPI16	21		ACGACGATGATC	0.358257
YDR374W-A		21		TCTTCCATGGAT	0.358456
YOL048C	RRT8	48		CTAAGGATGAAA	0.358631
YKR090W	PXL1	173		AAGTCAATGTAT	0.358692
YGR166W	KRE11	80		TTGACCATGGAA	0.358778
YPL144W	POC4	13		ATTGTGATGTTA	0.35898
YJL208C	NUC1	58		GTTATCATGTGC	0.359217
YNL326C	PFA3	46		TCGCAAATGAAT	0.359361
YPL083C	SEN54	78		ATTTAAATGCAA	0.359414
YGR072W	UPF3	65		TCTATCATGAGC	0.35946
YMR200W	ROT1	121		ATTACTATGTGG	0.359481
YGR046W	TAM41	92		GAAGTTATGTTA	0.359702
YOR069W	VPS5	77		CAAGCCATGGAC	0.359885
YPR181C	SEC23	60		CTAGCCATGGAC	0.359885
YGR170W	PSD2	56		ACGAAGATGAGG	0.359899
YML096W		24		TGAGACATGTGC	0.359904
YOR238W		7		TACTCAATGGAC	0.360124
YDR499W	LCD1	30		TTATAGATGAGA	0.360254
YPR046W	MCM16	10		TGACAGATGACA	0.360254
YDL190C	UFD2	193		TAGATCATGACC	0.360262
YHL026C		75		ACATATATGAAA	0.360272
YOL008W	COQ10	16		TGGAGAATGGTT	0.360323
YPR173C	VPS4	32		GTACAAATGAGC	0.360373
YJR154W		185		CATACGATGAAC	0.360427
YHR163W	SOL3	31		GACCAAATGGTG	0.360594
YDR538W	PAD1	61		GTAGATATGCTC	0.360631
YOR017W	PET127	68		TTGATAATGGGG	0.360658
YGL094C	PAN2	179		TGTATTATGAAT	0.360704
YNL078W	NIS1	9		CAGACAATGGAG	0.360824
YLL029W	FRA1	103		CTTCATATGACT	0.361281
YKL194C	MST1	39		CGCAATATGAAA	0.361299
YNL292W	PUS4	9		GGGAACATGAAT	0.361322
YDR357C	CNL1	79		TTTAGAATGCAA	0.36134
YER131W	RPS26B	416		TTTTAGATGCCA	0.361377
YDR262W		11		ACGACCATGATA	0.361457
YDR035W	ARO3	29		AGCATTATGTTC	0.361467
YDL069C	CBS1	133		CTCGACATGTTG	0.36178
YDR176W	NGG1	35		GGACATATGCCT	0.361794
YBR181C	RPS6B	29		GCCATCATGAAG	0.361848
YPL260W		96		AAGAGCATGTTT	0.361911
YBR204C		44		TTGGTAATGAAT	0.362058
YPL097W	MSY1	28		TGAATCATGCTC	0.362113
YLR372W	SUR4	144		ACAGTCATGAAC	0.362168
YOR367W	SCP1	25		TTACCGATGAGT	0.362357
YEL001C	IRC22	39		GCAATTATGAGG	0.362521
YNL113W	RPC19	48		AGGCAAATGACT	0.362624
YIL003W	CFD1	46		TTAAGCATGGAG	0.362771
YER053C	PIC2	98		TAAAGCATGGAG	0.362771
YPL093W	NOG1	32		CCGAAGATGCAA	0.362792
YDL133C-A	RPL41B	18		TTCCAAATGAGA	0.362934
YNR018W	AIM38	50		CGCACAATGAAG	0.363263
YHR110W	ERP5	29		GCTACTATGAAA	0.363313
YLR049C		191		CAACTCATGGTT	0.363338
YER001W	MNN1	49		TATTAAATGTTG	0.36338
YKR026C	GCN3	106		GGAAGGATGTCG	0.363477
YIR016W		21		TCGGTAATGAGT	0.363793
YER045C	ACA1	213		TAAAGTATGGAC	0.363793
YOR021C		40		TATACGATGAAG	0.363802
YGR023W	MTL1	152		TAAGGTATGGCA	0.363831
YML124C	TUB3	19		GAGACAATGAGA	0.363862
YDR130C	FIN1	28		CAAATTATGAGC	0.363877
YHR042W	NCP1	40		CATATCATGCCG	0.363985
YOL076W	MDM20	22		CGAAGCATGTCC	0.364025
YMR039C	SUB1	100		AGCGCTATGTCA	0.364254
YBR268W	MRPL37	18		CTGAAGATGTTG	0.364286
YCL034W	LSB5	56		AAGAACATGGGG	0.364709
YHR149C	SKG6	146		TTCGCGATGTAC	0.365013
YKR036C	CAF4	30		CTCTATATGGGT	0.36511
YIL005W	EPS1	133		GCAGCCATGAAA	0.365218
YDL010W	GRX6	33		TTTATTATGATA	0.365307
YGR100W	MDR1	82		TAGGATATGTCA	0.365391
YDR503C	LPP1	83		CCAAGGATGATC	0.365396
YEL068C		28		GAAAGGATGAAA	0.365545
YGL207W	SPT16	106		GTGAATATGGAA	0.365792
YGR119C	NUP57	89		GATCACATGTTT	0.366064
YPL229W		30		CATGAAATGATG	0.366195
YCL014W	BUD3	109		TCACCAATGGAG	0.366327
YDR334W	SWR1	164		GAATATATGACC	0.366411
YFR050C	PRE4	53		ACACGAATGAAT	0.366496
YGR288W	MAL13	70		TCGAGTATGACT	0.366575
YPL090C	RPS6A	29		TACATCATGAAG	0.366602
YOR301W	RAX1	18		TTCATCATGAAG	0.366602
YNL245C	CWC25	19		ATTATCATGGGG	0.366629
YLR146W-A		27		GTAGCCATGGAC	0.366822
YPL141C	FRK1	246		AATTTAATGTCG	0.366855
YAL028W	FRT2	64		GGTACAATGCAA	0.366872
YGL111W	NSA1	44		CGTAAAATGAGG	0.366888
YIL061C	SNP1	19		ACCTTGATGAAT	0.367047
YCL038C	ATG22	56		TTAGATATGAGC	0.36712
YPR155C	NCA2	66		TCTTAAATGATC	0.367198
YKL171W	NNK1	77		GAACGAATGTTT	0.367251
YCL052C	PBN1	40		TGAGTAATGGTG	0.367627
YKL098W	MTC2	26		ATAGGAATGGGC	0.367654
YLR453C	RIF2	79		GAGACAATGGAG	0.36778
YDR194C	MSS116	23		TGATAAATGTTG	0.367816
YNL103W	MET4	156		TGAACGATGAAG	0.368243
YMR178W		47		GGTATAATGGTG	0.368264
YLR324W	PEX30	67		TTTTCAATGAGT	0.368313
YNR055C	HOL1	457		TAACAGATGGAC	0.368421
YOL025W	LAG2	56		CTAGTAATGAGC	0.368505
YNL123W	NMA111	33		CTACTAATGACC	0.368505
YLR188W	MDL1	73		GCTCCAATGATT	0.368628
YDR330W	UBX5	59		TTTTATATGTCA	0.368655
YOR246C		63		GGCAGAATGTTA	0.368656
YNL157W	IGO1	19		GCCGCTATGTCG	0.368688
YHR112C		32		CGTAAGATGGTG	0.368693
YMR080C	NAM7	70		TATCAAATGGTC	0.368811
YML095C	RAD10	26		TAGAAGATGAAC	0.368976
YML127W	RSC9	75		TTGAAGATGAAC	0.368976
YGL035C	MIG1	131		ATAGCCATGCAA	0.369004
YDR260C	SWM1	40		ACGATTATGAGT	0.36908
YBL092W	RPL32	365		GATTAGATGGCC	0.369097
YHR097C		145		ACGCAAATGAAT	0.369222
YOR166C	SWT1	55		AAATCCATGACC	0.369246
YPR013C		578		AATTACATGAAT	0.369395
YPR009W	SUT2	94		TCAGATATGAAG	0.369449
YNL291C	MID1	212		CTAAGGATGATA	0.369482
YDL045C	FAD1	110		CACAATATGCAG	0.369489
YFR034C	PHO4	35		AAAGTCATGGGC	0.36959
YDR415C		55		CACAATATGAGG	0.369731
YGL005C	COG7	29		CAGAATATGGTA	0.369731
YLR380W	CSR1	93		TAGATTATGTCC	0.369859
YOR138C	RUP1	70		GCTACGATGATG	0.369949
YJL181W		22		ACTATTATGGAG	0.369995
YIR014W		24		AAGGAAATGTTG	0.370045
YBR084W	MIS1	14		AAGGAAATGTTG	0.370045
YJL030W	MAD2	44		CATTTAATGTCA	0.370047
YDR452W	PPN1	150		TTTTCGATGGTT	0.370125
YPL236C		71		CGATCAATGATT	0.370164
YMR063W	RIM9	63		AGGAGAATGGTT	0.37021
YNL299W	TRF5	84		GTCGTCATGACA	0.370241
YDR525W-A	SNA2	28		TACACTATGCAC	0.370431
YGL067W	NPY1	59		GAGAGAATGTCC	0.370493
YDR288W	NSE3	6		ATTAGCATGAGT	0.370602
YGR165W	MRPS35	54		ATTGTGATGAGT	0.37064
YDL167C	NRP1	56		GAAATTATGCAC	0.370648
YOR257W	CDC31	34		TACAGTATGAGT	0.370674
YBR003W	COQ1	29		GGGACGATGTTT	0.370807
YLR040C		64		GTATCAATGATA	0.370893
YNL082W	PMS1	45		TTTAGCATGACA	0.370919
YMR286W	MRPL33	17		TCAGGAATGGTG	0.371001
YHR084W	STE12	320		CCAAGGATGAAA	0.371009
YBR215W	HPC2	37		TTGGAAATGGAC	0.371161
YMR166C		253		AAGATAATGAAC	0.371498
YHR026W	VMA16	115		AAGATAATGAAC	0.371498
YPL049C	DIG1	49		GTGAGAATGGCC	0.371654
YKL160W	ELF1	8		CGAGCCATGGGT	0.371969
YBL081W		314		GTATATATGCCA	0.37204
YOR206W	NOC2	29		GTGGAGATGGGT	0.372149
YFR018C		38		GTAAGCATGGGA	0.372206
YPL157W	TGS1	120		GAAGTGATGGGA	0.372244
YLL008W	DRS1	30		TATACTATGGTG	0.372293
YLR381W	CTF3	51		ACATGAATGAGT	0.37237
YER170W	ADK2	55		GCATCAATGAAA	0.372425
YIR012W	SQT1	25		AGCGTAATGGAA	0.372853
YER115C	SPR6	217		TTGTATATGGCT	0.372869
YDR379C-A		22		AAGAGCATGCCT	0.372963
YOL031C	SIL1	52		CTTAGAATGGTC	0.373034
YNL188W	KAR1	101		TCATGAATGAAT	0.373146
YBL080C	PET112	16		CTAGATATGTTG	0.373175
YDR055W	PST1	61		AATATCATGCAA	0.373209
YDR304C	CPR5	30		GCAATTATGAAG	0.373245
YKL151C		302		CTGGAAATGTTA	0.373264
YDR173C	ARG82	63		TTTCACATGGAT	0.373573
YLR093C	NYV1	73		TACCAAATGAAA	0.37367
YML027W	YOX1	216		TTCTTGATGTCA	0.373717
YOL141W	PPM2	38		AATACGATGAAG	0.373784
YNL173C	MDG1	52		TCTAGAATGCAA	0.373811
YJR066W	TOR1	32		ATTGATATGGAA	0.373965
YOR001W	RRP6	31		TGCGTTATGACT	0.374024
YBR005W	RCR1	89		TAAGGAATGGGA	0.374326
YOL158C	ENB1	126		CTGAAAATGCTG	0.374396
YAL053W	FLC2	140		ATAGCCATGATC	0.374417
YDL116W	NUP84	41		TTTCAAATGGAA	0.374477
YKR062W	TFA2	61		TTTGCGATGAGT	0.374483
YPL064C	CWC27	9		AATGCTATGTCC	0.374511
YPR182W	SMX3	62		AAGACAATGAGC	0.37457
YAR014C	BUD14	150		AAGAGAATGAGT	0.37457
YMR291W		83		CAGGATATGACT	0.374583
YKL038W	RGT1	235		CAAATTATGAAC	0.37464
YLR129W	DIP2	56		GCTATTATGGTC	0.374653
YCR046C	IMG1	6		ATAGCGATGTGG	0.374671
YOL103W	ITR2	164		GCTGAAATGAAG	0.374797
YHR002W	LEU5	148		TTAAGTATGACG	0.3748
YPL155C	KIP2	41		CCATTGATGATT	0.375068
YDR208W	MSS4	124		TAACTCATGTCA	0.37512
YKL084W	HOT13	365		ATATAGATGATC	0.375323
YPL235W	RVB2	64		GTCAGCATGTCG	0.375641
YCL063W	VAC17	40		CGATTAATGGCA	0.375738
YMR088C	VBA1	117		AGAAGAATGCAA	0.375786
YML102W	CAC2	29		AGGACAATGGAA	0.375897
YBR188C	NTC20	75		ACCAGTATGCCC	0.375925
YAR007C	RFA1	63		CAAGAGATGAGC	0.376046
YJL212C	OPT1	32		GAACACATGAGT	0.376071
YBR138C		30		TAAAGGATGGAG	0.376129
YGL036W		51		ACCAGAATGCAG	0.376237
YKL073W	LHS1	39		ATTACCATGCGA	0.376295
YGL137W	SEC27	24		GACACGATGAAG	0.376469
YOR161C	PNS1	122		TACGTCATGCCA	0.376655
YOR357C	SNX3	7		CAAAGTATGCCA	0.377027
YJL103C	GSM1	195		ATACATATGACC	0.377193
YGL242C		55		TTGATCATGAAT	0.377326
YHR132C	ECM14	42		TATATCATGTTG	0.377326
YCR026C	NPP1	74		CTATAGATGGAA	0.377379
YPR129W	SCD6	22		AAGGCAATGTCG	0.377458
YEL012W	UBC8	95		CGAAAGATGAGG	0.377588
YML107C	PML39	13		TTACTAATGGAA	0.37767
YNL308C	KRI1	37		AATTCAATGCCA	0.377707
YNL221C	POP1	62		TTACAAATGAGC	0.377709
YCR061W		25		AGAGTAATGGTG	0.377714
YER044C	ERG28	39		CAGATAATGTTC	0.377828
YPL138C	SPP1	55		TTTCTAATGTCA	0.37791
YGL236C	MTO1	9		AGAACGATGCTG	0.378347
YLR352W		115		AGCCAAATGCCA	0.37862
YCR044C	PER1	7		AGAAATATGAGG	0.378739
YJL172W	CPS1	28		TACATTATGATC	0.378757
YDL066W	IDP1	17		CCCAGCATGAGT	0.378843
YJL133W	MRS3	77		GATATTATGGTA	0.378843
YNL131W	TOM22	47		ATTCAAATGGTC	0.378931
YDR387C		146		AGAGGTATGTCT	0.379083
YHR059W	FYV4	52		TTTACTATGATA	0.379223
YGL117W		79		CTTACAATGCAG	0.37923
YBR194W	AIM4	69		AGCTTAATGGAT	0.379294
YOR087W	YVC1	72		AGCATTATGGTA	0.379309
YDL070W	BDF2	23		GCGGCTATGTCT	0.379474
YNL190W		240		TGAAATATGAAG	0.379529
YKR099W	BAS1	257		TCGAGAATGTCG	0.379552
YNL096C	RPS7B	44		TGACCAATGTCC	0.379602
YDR405W	MRP20	53		CAGAATATGCCA	0.379831
YBR146W	MRPS9	63		AGCGGAATGTTT	0.380009
YPR025C	CCL1	20		GATAGAATGACG	0.380225
YOR191W	ULS1	86		TGTCAAATGGCA	0.380479
YNR003C	RPC34	29		CTGAATATGAGT	0.380547
YPL069C	BTS1	26		AAATCAATGGAG	0.380587
YBR092C	PHO3	29		TTACCTATGTTT	0.38059
YLR193C	UPS1	59		GTTGCAATGGTC	0.380732
YBR108W	AIM3	52		ACCAGCATGGGA	0.380877
YNL218W	MGS1	206		GTCTCAATGAGT	0.381137
YJR053W	BFA1	51		TATGCTATGTCA	0.381307
YOR124C	UBP2	107		AAGGAAATGCCG	0.381345
YHR022C		61		AACGCTATGAGT	0.381352
YIL078W	THS1	48		ACGGAGATGAGT	0.381424
YJR116W		108		GCCGCAATGAAC	0.381481
YDR049W	VMS1	37		AATAGCATGAAT	0.381564
YLR071C	RGR1	52		TGGGCAATGACT	0.381874
YOR321W	PMT3	49		CAGACAATGCCG	0.381896
YHR194W	MDM31	42		TACTATATGTCC	0.382229
YGL068W	MNP1	47		CCCAGTATGTCC	0.38233
YDL175C	AIR2	27		GCAGTCATGGAA	0.382403
YGL128C	CWC23	6		ACGACTATGCCA	0.382419
YPR179C	HDA3	40		TTTAGTATGGAT	0.382463
YOR171C	LCB4	68		TAGATAATGGTG	0.382562
YDL230W	PTP1	26		GTGGAGATGGCA	0.382687
YGR021W		48		TGGAAAATGTTG	0.382758
YER104W	RTT105	18		TCGGAAATGTAC	0.382771
YMR257C	PET111	388		AACTTAATGTTA	0.382933
YPL265W	DIP5	123		TAAGTAATGAAG	0.382958
YNL233W	BNI4	176		CAGAATATGTCG	0.382972
YIL001W		59		ATATTTATGGCA	0.383198
YDR386W	MUS81	21		GAAAGCATGGAA	0.383216
YER087W	AIM10	38		ATAGCCATGTTG	0.383312
YHR206W	SKN7	486		TCCACTATGAGC	0.383467
YHR115C	DMA1	183		TCCTGGATGTCT	0.383663
YBR234C	ARC40	46		CTCCTAATGTCA	0.383672
YNL124W	NAF1	28		CTAATCATGAGC	0.384045
YIL093C	RSM25	83		TGAGAAATGAAG	0.384356
YDR139C	RUB1	51		TAACCGATGATT	0.384363
YMR238W	DFG5	134		GCAGATATGATC	0.384365
YGR076C	MRPL25	24		AACTCCATGTCA	0.384443
YPR003C		55		TATAGGATGACA	0.384576
YGR234W	YHB1	20		TTCATTATGCTA	0.384576
YDR263C	DIN7	99		ATAGGAATGGGA	0.384597
YFR049W	YMR31	162		AGGGAAATGATT	0.384646
YKL065C	YET1	36		ATTGCGATGAGT	0.384759
YKR037C	SPC34	19		TACAGAATGGGG	0.384999
YGL075C	MPS2	192		GTAAGTATGAGT	0.38502
YDR297W	SUR2	31		TATACGATGAAC	0.385048
YDR045C	RPC11	155		TTTAGGATGCTT	0.385048
YNL072W	RNH201	21		GATTAAATGGTA	0.385062
YKL055C	OAR1	34		CTGGAAATGCAT	0.385135
YNL036W	NCE103	51		ATCAGAATGAGC	0.385176
YHR161C	YAP1801	138		GGCGAGATGACA	0.385274
YGR262C	BUD32	29		CTCATTATGACG	0.385363
YDR508C	GNP1	44		CACATTATGACG	0.385363
YMR312W	ELP6	22		ACATTTATGGGT	0.385507
YGL221C	NIF3	11		AACGCAATGAGC	0.385689
YOR046C	DBP5	32		ATCGGAATGAGT	0.385689
YGR156W	PTI1	134		AAATTGATGACA	0.385788
YKR095W-A	PCC1	14		AAATTGATGACA	0.385788
YBR291C	CTP1	36		TTACCGATGTCC	0.385962
YGR161C	RTS3	94		AGTATAATGATC	0.386157
YMR171C	EAR1	196		AAGCAAATGTCA	0.386246
YMR275C	BUL1	51		CGCTAAATGGCC	0.386279
YDR540C	IRC4	83		ACTATCATGAGA	0.386343
YIL144W	TID3	102		CTATAAATGCAA	0.38664
YGR056W	RSC1	48		TCAAGCATGGTG	0.386647
YDR111C	ALT2	221		GAACACATGACA	0.38672
YBR094W	PBY1	66		TTTAAGATGCGG	0.386813
YFR022W	ROG3	290		TTCGACATGGGC	0.386853
YGR146C	ECL1	297		CATATAATGAGC	0.386902
YMR137C	PSO2	40		TTGATTATGTCA	0.386903
YJL196C	ELO1	23		GCAAGTATGGTA	0.386987
YHR034C	PIH1	34		TAACCGATGGCC	0.387172
YOR071C	NRT1	41		ATCATCATGAGC	0.387204
YAL042W	ERV46	16		GACATCATGAAA	0.387262
YMR247C	RKR1	61		TTCTTAATGTCG	0.387264
YKL214C	YRA2	64		TTTGCAATGGAC	0.387328
YOR370C	MRS6	340		AAAGTTATGTTA	0.38735
YDR518W	EUG1	25		AATACCATGCAA	0.387426
YBR162W-A	YSY6	17		CCTGCGATGGCC	0.38747
YGR120C	COG2	26		GGCGAAATGGAC	0.387515
YMR210W		34		GACGATATGCGT	0.387669
YGR198W	YPP1	37		TGCCCAATGCCT	0.38774
YCL024W	KCC4	62		TGCAGTATGACT	0.387755
YNL274C	GOR1	67		GAGAATATGAGT	0.387884
YKR078W		17		TTAGATATGGAG	0.388172
YBR203W	COS111	212		GTATTGATGTCA	0.388181
YBR211C	AME1	57		CTCAGTATGGAT	0.388294
YBR193C	MED8	41		TGGAATATGTCA	0.388315
YER141W	COX15	30		TACGTCATGCTT	0.388528
YKL192C	ACP1	25		CTTGCCATGTTT	0.388583
YFL025C	BST1	79		TTCGTTATGGGT	0.388633
YDR468C	TLG1	94		TAACAAATGAAC	0.388882
YLR215C	CDC123	61		TTATTGATGTCC	0.388932
YKR045C		28		CCTAGCATGTCA	0.389192
YER161C	SPT2	38		TTAGTTATGAGT	0.389251
YNL172W	APC1	88		TAACTTATGACT	0.389251
YNL325C	FIG4	25		ACAAGGATGAAC	0.389289
YDR322W	MRPL35	26		CGAACTATGTTA	0.389325
YPL128C	TBF1	60		TTTGTCATGGAT	0.389367
YPL206C	PGC1	23		ACGAGGATGGTT	0.389404
YPR069C	SPE3	24		AATCTAATGGCA	0.389497
YER028C	MIG3	68		CCATATATGAAT	0.389503
YPR187W	RPO26	16		GTGATCATGTCA	0.389606
YJR132W	NMD5	61		TTCTCGATGGAT	0.389648
YKL089W	MIF2	25		TCACTCATGGAT	0.389762
YML119W		20		GTAGCAATGAGC	0.389917
YJL187C	SWE1	93		GAACAGATGAGT	0.389917
YLL058W		60		ATTATTATGACG	0.389991
YOR067C	ALG8	41		CCTACGATGAAA	0.390049
YGR253C	PUP2	60		GAAAGGATGTTC	0.390092
YGL163C	RAD54	123		TAACTGATGGCA	0.390151
YER059W	PCL6	182		GCCGGTATGTCT	0.39022
YGL174W	BUD13	17		TATTACATGGCA	0.390309
YGL196W	DSD1	65		TTTGAAATGAGC	0.39035
YDR082W	STN1	92		GGAGCCATGGAT	0.390355
YJL053W	PEP8	48		AGCATTATGAGT	0.390405
YBR106W	PHO88	33		CCCGCCATGAAT	0.390568
YNL038W	GPI15	11		GATGATATGATT	0.39061
YPR152C	URN1	22		ATCGCCATGCGT	0.390669
YOR226C	ISU2	21		GCATAGATGTTC	0.390685
YMR236W	TAF9	10		ACCATTATGAAC	0.390758
YBR107C	IML3	49		GATGGAATGCCT	0.391132
YPR082C	DIB1	8		GTTTTGATGGCT	0.391348
YJR065C	ARP3	26		GATTCAATGTCA	0.391549
YPR188C	MLC2	22		GTAGATATGGAC	0.391985
YLR231C	BNA5	27		GTAATTATGGAG	0.39216
YAL061W	BDH2	89		TTCAGAATGAGA	0.392165
YDR404C	RPB7	192		CTGAGAATGTTT	0.392221
YDR376W	ARH1	63		GTGAAAATGAGC	0.392295
YML114C	TAF8	179		AGGGCAATGACT	0.392352
YIL079C	AIR1	30		GATATTATGTCG	0.39241
YNL040W		29		GTTATCATGCCC	0.392669
YIR038C	GTT1	24		AGCATTATGTCG	0.392893
YML112W	CTK3	27		GCAAGGATGGAC	0.392932
YFR014C	CMK1	50		ATTACTATGGAC	0.392957
YBR052C	RFS1	64		TAGATAATGCCG	0.393013
YCR073C	SSK22	65		GTGAAAATGATG	0.393159
YKL127W	PGM1	25		TAGTAAATGTCA	0.393255
YDR119W	VBA4	95		GTAGAGATGGGG	0.393632
YBR011C	IPP1	31		TTACTAATGACC	0.393678
YCR059C	YIH1	14		AGCTCAATGGAT	0.393743
YDL181W	INH1	86		TAGAATATGTTA	0.393753
YHR109W	CTM1	15		GTTGAAATGGAG	0.393791
YPR166C	MRP2	38		TAACCGATGGGT	0.39386
YPL239W	YAR1	78		GCAGATATGGGC	0.393863
YLR452C	SST2	172		TGTAAGATGGTG	0.393878
YPR097W		236		CTTCAAATGATT	0.394276
YDR268W	MSW1	51		AGGAAGATGTCG	0.394327
YOR374W	ALD4	48		TAAAGCATGTTC	0.394338
YDR328C	SKP1	67		GCAGATATGGTG	0.39473
YEL071W	DLD3	36		AGAATTATGACG	0.394751
YER057C	HMF1	43		AGAATTATGGTC	0.394751
YBR264C	YPT10	25		TACGATATGGAA	0.39477
YDR300C	PRO1	52		GCGAAAATGAAG	0.394784
YPL214C	THI6	107		GCGGAAATGGTA	0.394825
YBR200W	BEM1	55		ATATAAATGCTG	0.394903
YGL263W	COS12	12		ATAGGCATGGAT	0.395018
YDR486C	VPS60	9		GCAATTATGAAC	0.395042
YBR235W		81		GGATTAATGGTT	0.395054
YGR093W		50		AATAGGATGACA	0.395128
YGL210W	YPT32	20		CCAAGAATGAGC	0.395219
YOR198C	BFR1	33		ATTGCCATGTCC	0.395269
YOR108W	LEU9	30		GTAGCCATGGTA	0.395336
YOR059C		35		CTTCAGATGACT	0.395345
YKR077W	MSA2	25		CAATCAATGGTA	0.395514
YMR198W	CIK1	276		ATTAGGATGAAT	0.395613
YNL008C	ASI3	27		TGACTGATGTCT	0.395651
YNL207W	RIO2	125		ACTAGAATGAAA	0.395688
YLR413W		50		ATTGCGATGAAT	0.39614
YDL104C	QRI7	19		TTCATTATGATA	0.396211
YBR030W	RKM3	57		AGTGAGATGTCC	0.396225
YMR136W	GAT2	98		ATCGAGATGCAA	0.396351
YPL149W	ATG5	77		GTAAGTATGAAT	0.396409
YJL050W	MTR4	48		CGAAGGATGGAT	0.396545
YDR116C	MRPL1	25		AAGAAGATGCTA	0.39657
YKL155C	RSM22	53		GGTAAAATGATG	0.396671
YJL019W	MPS3	103		CTGGAAATGAAT	0.396788
YGR188C	BUB1	47		CAGGAAATGAAT	0.396788
YGL204C		84		CTGGAAATGAAT	0.396788
YGL026C	TRP5	18		CAGACCATGTCA	0.396798
YOR253W	NAT5	29		CGAAATATGGGC	0.396956
YOR076C	SKI7	13		CCTGACATGTCG	0.396979
YMR197C	VTI1	29		CTTACTATGAGT	0.397123
YPL057C	SUR1	184		CTCACGATGAGA	0.397184
YML086C	ALO1	156		CACCCCATGTCT	0.397326
YMR292W	GOT1	30		CGTAAAATGTGG	0.397539
YLL007C		87		TAAGCAATGAAG	0.397547
YMR244C-A		41		ATAGCGATGGGC	0.397795
YHR178W	STB5	62		AAGGACATGGAT	0.397956
YJL106W	IME2	809		TCATTTATGGTT	0.397999
YKL039W	PTM1	118		GGCACAATGAGA	0.39817
YJL186W	MNN5	29		GTTACAATGCTG	0.398236
YHR039C-A	VMA10	27		AGCAGAATGGTA	0.398237
YKR093W	PTR2	94		CTTATAATGCTC	0.398346
YJL100W	LSB6	65		CAAAGCATGAGT	0.398675
YJL126W	NIT2	7		CCGCAAATGACT	0.398689
YBL033C	RIB1	28		TACAGGATGACC	0.398736
YDR238C	SEC26	29		GCACCTATGACT	0.398839
YPR190C	RPC82	30		ATCCAAATGGAC	0.398918
YDR494W	RSM28	33		TAGAAAATGCGC	0.399092
YDL001W	RMD1	78		TTAGTCATGGTA	0.399149
YHR008C	SOD2	34		ACCAGGATGTTC	0.399179
YBL002W	HTB2	23		CAACTAATGTCC	0.399292
YNR058W	BIO3	266		CAACTAATGTCC	0.399292
YBL021C	HAP3	24		GAGAATATGAAT	0.399357
YMR223W	UBP8	218		ATAATTATGAGC	0.3994
YLR362W	STE11	65		ATATACATGGAA	0.399511
YBR086C	IST2	291		CATACTATGTCG	0.399654
YCL004W	PGS1	78		ATATTAATGACG	0.399773
YLR181C	VTA1	67		AATTCTATGGCT	0.399787
YDL233W		22		TGCAATATGTAC	0.399802
YER067W	RGI1	76		CTTTAAATGACA	0.399841
YKL222C		118		TAGAAAATGAAG	0.399971
YNL160W	YGP1	55		TAGAAAATGAAG	0.399971
YJL171C		32		AGACAAATGTTA	0.399978
YMR098C	ATP25	82		GTTGACATGAAT	0.400153
YKL198C	PTK1	308		CAACCAATGACA	0.400171
YDR482C	CWC21	14		CCAGTCATGTCG	0.400364
YPR134W	MSS18	9		GCACATATGGGT	0.400667
YOL115W	PAP2	66		TGAAATATGGGG	0.400673
YMR269W	TMA23	30		TCGGACATGGAT	0.400696
YNL032W	SIW14	140		AAGGAGATGGGT	0.400754
YBR077C	SLM4	424		AGCAATATGGTG	0.401103
YGR281W	YOR1	226		ACGAATATGACG	0.401338
YMR073C	IRC21	27		AGAGATATGAGT	0.401391
YPL263C	KEL3	22		TGATTAATGGCA	0.401405
YBR216C	YBP1	30		ACACTAATGGAA	0.401425
YML009C	MRPL39	42		GCCGATATGGTA	0.401439
YGL225W	VRG4	41		GCCCGAATGTCT	0.401476
YLR045C	STU2	73		TTGACTATGTCA	0.401642
YDR363W	ESC2	176		TAACAGATGACC	0.401734
YDR229W	IVY1	101		TCGGATATGCCT	0.401825
YGR005C	TFG2	30		AACACCATGAGC	0.401954
YLR168C	UPS2	25		ACGATAATGAAA	0.40203
YHR040W	BCD1	16		GCAAGTATGGCG	0.402103
YOL030W	GAS5	48		ATAGCTATGTTA	0.402105
YNR061C		86		ACATATATGTTA	0.402181
YGR088W	CTT1	25		TCACAAATGAAC	0.402304
YJL061W	NUP82	40		CAAAGTATGTCC	0.402345
YBR212W	NGR1	406		ACACAAATGATG	0.402351
YPL032C	SVL3	198		ATAGTTATGTCG	0.40248
YDR206W	EBS1	338		AATTAAATGGAA	0.402482
YOR284W	HUA2	47		GAAACTATGCAA	0.402498
YDR046C	BAP3	90		AAGGTAATGTCA	0.402576
YLR047C	FRE8	248		TTCAGCATGAAT	0.402792
YNL179C		1000		GATGAGATGAGT	0.402967
YKR071C	DRE2	63		GTATCGATGTCA	0.402968
YLL018C-A	COX19	58		AATCCAATGTCA	0.40307
YNR015W	SMM1	24		GAGATCATGGTT	0.403147
YMR183C	SSO2	77		GCAGCAATGAGC	0.403375
YGL211W	NCS6	23		ACCGTCATGTCG	0.403657
YPR083W	MDM36	24		TATAGCATGGAT	0.403662
YOR281C	PLP2	28		GACATAATGCAG	0.403857
YOR324C	FRT1	147		GTGAAAATGAAC	0.4039
YLR361C	DCR2	21		CTTAACATGATC	0.403925
YLR191W	PEX13	49		CCTGCGATGTCA	0.404059
YLR098C	CHA4	12		GCAGCAATGATG	0.404263
YGL166W	CUP2	21		CACAGAATGGTC	0.404592
YJR117W	STE24	30		TTATTCATGTTT	0.404776
YJR080C	AIM24	21		CCCATCATGATA	0.404943
YPL015C	HST2	56		GTTTCGATGTCT	0.404986
YKL215C	OXP1	74		TATACAATGCAG	0.405135
YDR247W	VHS1	369		AAAGTAATGATG	0.405371
YGL029W	CGR1	45		GGAAATATGGTG	0.4055
YDR398W	UTP5	43		TTACCGATGGAT	0.405511
YOR036W	PEP12	17		GTTGAGATGTCG	0.405534
YDL171C	GLT1	285		GAAAGCATGCCA	0.405596
YIL142W	CCT2	27		TTCAGGATGAGT	0.405624
YIR002C	MPH1	91		TCTCTGATGGCT	0.405638
YNR006W	VPS27	28		AACAGTATGTCC	0.405654
YER040W	GLN3	87		AAACAAATGCAA	0.40569
YGR049W	SCM4	49		AAACAAATGCAA	0.40569
YIL161W		10		AGGGAAATGGAT	0.40581
YIL098C	FMC1	21		AGGGAAATGGAT	0.40581
YPR144C	NOC4	23		AAGAATATGGTA	0.405826
YGL179C	TOS3	88		AAGAATATGGTA	0.405826
YNL004W	HRB1	20		CAGGATATGTCT	0.405877
YPR020W	ATP20	49		TTCATCATGCTA	0.405891
YPL181W	CTI6	125		AGAGTAATGGAA	0.405914
YBR078W	ECM33	176		TCCGCAATGCAA	0.405975
YCL064C	CHA1	19		AGCGAGATGTCG	0.406033
YPR185W	ATG13	310		TGAGTCATGGTT	0.406045
YJR085C		44		CACACTATGGAA	0.406188
YMR010W		265		TAGAGAATGTCA	0.40621
YLL051C	FRE6	14		TTGAATATGCAT	0.406276
YNL240C	NAR1	47		GAAAGCATGAGT	0.40636
YGR134W	CAF130	150		AAAGTGATGACG	0.40647
YNL035C		32		TAGAGCATGGCT	0.4065
YAL060W	BDH1	48		TTAATTATGAGA	0.406647
YJL068C		21		TTCAATATGAAG	0.406672
YGR283C		46		GGGAAGATGGCA	0.406696
YDL123W	SNA4	30		CGCATCATGTGT	0.406759
YLR315W	NKP2	54		TTATAAATGAAC	0.406803
YHL023C	NPR3	32		GCTTCAATGGAT	0.406831
YJR112W	NNF1	38		CCGAGAATGGTT	0.40703
YBR128C	ATG14	30		TATGACATGCAT	0.407086
YGR121C	MEP1	39		GAAACTATGGAG	0.407099
YFL008W	SMC1	41		GACGCAATGGGA	0.407238
YNR048W		59		TGCAATATGGGA	0.407483
YIL065C	FIS1	39		ATAAGTATGACC	0.407573
YBR028C		81		ATTAGGATGATT	0.407583
YLR395C	COX8	43		TACGCAATGTTG	0.407647
YGR071C		57		ATTAATATGAAC	0.407738
YOL101C	IZH4	13		GACAGTATGGTT	0.407754
YKR096W		74		TATATTATGCCA	0.407914
YPL232W	SSO1	163		AATCAAATGAGT	0.407989
YHR030C	SLT2	204		TGGGAGATGGCT	0.408026
YLR074C	BUD20	22		CGCATCATGGGT	0.408034
YML075C	HMG1	78		ACAAGCATGCCG	0.408108
YLR221C	RSA3	45		TACAGGATGTCG	0.408208
YER093C-A	AIM11	21		GAAACTATGATC	0.408403
YCL045C	EMC1	40		ATAGCAATGAAG	0.408455
YOL123W	HRP1	380		TAAGCAATGAGC	0.408675
YGL153W	PEX14	16		TAAGGAATGAGT	0.408675
YOR028C	CIN5	262		ACTCAAATGTTA	0.408792
YCL016C	DCC1	29		TGTACCATGTCC	0.40885
YDR207C	UME6	86		CTCACGATGCTA	0.408933
YJL044C	GYP6	49		GCAACCATGAAG	0.408939
YDR147W	EKI1	62		GGCATAATGTAC	0.409047
YGL032C	AGA2	136		ATTAAGATGCAG	0.409183
YCR063W	BUD31	22		AACGACATGCCG	0.409225
YOL129W	VPS68	20		ATCATCATGGAG	0.409408
YNR046W	TRM112	12		GTCAACATGAAG	0.409513
YBR103W	SIF2	166		CGGAAAATGAGT	0.409567
YJR017C	ESS1	22		GCACCAATGCCA	0.409571
YOR311C	DGK1	47		GACAATATGGGG	0.409623
YLR459W	GAB1	12		AGACCAATGGAT	0.409773
YDR287W	INM2	32		GAAGCGATGGTA	0.409892
YNL251C	NRD1	272		CCCATAATGCAG	0.409894
YKL063C		166		GAAAATATGCAG	0.410006
YFR039C		129		AAAATCATGAAG	0.410059
YBL026W	LSM2	71		GCAAGTATGCTT	0.410091
YDR123C	INO2	76		GAGAAAATGCAA	0.410104
YBR060C	ORC2	92		CATAACATGCTA	0.41013
YPL266W	DIM1	47		TATACCATGGGA	0.410131
YDL225W	SHS1	41		TTAATCATGAGC	0.41028
YOL111C	MDY2	49		TTAATCATGAGC	0.41028
YPL013C	MRPS16	27		TCAAGTATGACC	0.41038
YGL201C	MCM6	67		TTTTCAATGTCA	0.410384
YIL014W	MNT3	174		CTAAGCATGCTT	0.410468
YBR104W	YMC2	88		TTAGTCATGAGT	0.410826
YDR395W	SXM1	116		AAGGAAATGGTA	0.410988
YNR011C	PRP2	10		CAACACATGTCA	0.411103
YHR056C	RSC30	52		TTAATCATGATG	0.411183
YGL131C	SNT2	72		CACGCTATGCCT	0.411518
YHL010C	ETP1	36		ACATCTATGGAT	0.41203
YBR286W	APE3	30		CCAACCATGCAC	0.412164
YPL148C	PPT2	137		CCAGTGATGAGT	0.412477
YER042W	MXR1	31		GTTGCAATGTCG	0.41254
YKL186C	MTR2	45		AGAAATATGAAC	0.412715
YDR410C	STE14	18		CACAACATGCAC	0.412743
YML034W	SRC1	68		GCCGCGATGAAT	0.412756
YPL034W		334		ATAGGAATGACC	0.412758
YNR074C	AIF1	138		AAATATATGACA	0.412758
YOL005C	RPB11	37		TGCATCATGAAT	0.412903
YLR446W		86		CAGAACATGACA	0.413013
YNL099C	OCA1	24		CTTAGAATGACA	0.413013
YER049W	TPA1	82		AATATAATGAAG	0.413109
YJR113C	RSM7	55		AATATAATGCTG	0.413109
YGR080W	TWF1	15		CATCACATGTCT	0.413161
YKR041W		6		GCCGATATGAGT	0.413183
YJL020C	BBC1	76		CTAAGGATGAGT	0.413354
YER105C	NUP157	19		ATTGTGATGTAT	0.413484
YBR287W		33		TACTATATGGTT	0.41374
YNL006W	LST8	10		TGATTGATGTCT	0.413883
YLL010C	PSR1	242		AACAGTATGGGT	0.413956
YLR447C	VMA6	45		GCGAAGATGGAA	0.414096
YOR194C	TOA1	69		GATATCATGTCG	0.41416
YPL167C	REV3	50		TTGGAAATGTCG	0.414337
YLR435W	TSR2	79		GGAACAATGAGC	0.41438
YJR125C	ENT3	60		GGAAGAATGAGT	0.41438
YMR241W	YHM2	145		ATAGCTATGCCA	0.414385
YGR149W		111		ATCGTAATGTAC	0.414484
YDR047W	HEM12	124		AACGCTATGGGT	0.414507
YJL062W	LAS21	25		AGCAAGATGAAC	0.414845
YBR272C	HSM3	7		GGAGCAATGAGT	0.414932
YDL217C	TIM22	160		ACGAAGATGGTG	0.414946
YGL136C	MRM2	26		TACAGCATGATT	0.414979
YHR077C	NMD2	56		GAAATTATGGAC	0.415062
YJL210W	PEX2	52		CGCAGCATGTCT	0.415083
YGR092W	DBF2	59		TTTAATATGCTA	0.415136
YNL137C	NAM9	94		GAGATAATGCCA	0.415161
YNL270C	ALP1	188		ATTGCCATGGAT	0.41529
YPL248C	GAL4	22		TGAAAGATGAAG	0.415313
YGL064C	MRH4	7		AGACAAATGTCG	0.415601
YOR090C	PTC5	125		CTCTCCATGTCT	0.415636
YGR036C	CAX4	165		CATATCATGAAT	0.415698
YGR199W	PMT6	41		TTACCAATGAGT	0.415735
YGL206C	CHC1	113		TAACCAATGAGT	0.415735
YDR527W	RBA50	31		ATCGTAATGGAC	0.415784
YDL018C	ERP3	60		TCCGTCATGTCC	0.415821
YML081W		143		TCTGCCATGTCA	0.416331
YIL044C	AGE2	26		CAAGCGATGTCG	0.416541
YOR094W	ARF3	96		GTAGAGATGGGC	0.41662
YJR016C	ILV3	15		GTAGAGATGGGC	0.41662
YOR332W	VMA4	31		TACAGCATGTCC	0.416705
YNL202W	SPS19	20		GATACTATGAAT	0.416753
YER058W	PET117	32		GCTGAGATGAGT	0.416874
YMR233W	TRI1	45		AGCATTATGGCC	0.417141
YGR230W	BNS1	49		TTTGCGATGTCA	0.41726
YKL047W		21		AGCACTATGAAT	0.417266
YDR005C	MAF1	108		ACGACAATGAAA	0.417345
YDL219W	DTD1	26		TTTACAATGAAG	0.417393
YLR304C	ACO1	39		TATACAATGCTG	0.417393
YKL077W		64		GGAATAATGAGA	0.417569
YGR055W	MUP1	33		GGAGCAATGTCG	0.417576
YOR244W	ESA1	58		TCATCGATGTCC	0.417682
YCR090C		37		ACGATAATGCCG	0.417733
YOL078W	AVO1	22		ACGATAATGGAC	0.417733
YGR216C	GPI1	47		AATGACATGCCA	0.417743
YDR066C	RTR2	89		GCCATAATGCAG	0.417795
YGR178C	PBP1	213		AACAATATGAAG	0.41783
YNL101W	AVT4	187		TCATCAATGGTC	0.417859
YNL110C	NOP15	38		ATCGATATGGTA	0.417873
YML131W		40		AACGATATGGTA	0.417873
YMR072W	ABF2	22		AAATAAATGAAC	0.417965
YDR188W	CCT6	37		AGAAGCATGTCA	0.417975
YBR071W		72		CGTAAAATGCTA	0.418224
YNR035C	ARC35	8		TCCGCAATGCTA	0.418258
YMR036C	MIH1	42		GAAACCATGAAC	0.418381
YDR072C	IPT1	133		GAAAGCATGAAT	0.418381
YDR127W	ARO1	23		ATTACGATGGTG	0.418574
YGR257C	MTM1	110		TACGATATGAGT	0.418612
YOR093C		29		ACTCCAATGGAT	0.418803
YPL270W	MDL2	23		ATCGCAATGTTG	0.418832
YKR022C	NTR2	56		CACATTATGGCG	0.418866
YCR034W	FEN1	26		GAAGCCATGAAT	0.418938
YPL095C	EEB1	33		ATTTTAATGTTT	0.418975
YOR014W	RTS1	254		TTCAATATGATG	0.418976
YHR205W	SCH9	407		TACAATATGATG	0.418976
YLR207W	HRD3	9		CAAACTATGATA	0.419143
YBR154C	RPB5	91		AAGACAATGGAC	0.419178
YGL164C	YRB30	65		AAGAGAATGGAT	0.419178
YKR067W	GPT2	107		TCCTTTATGTCT	0.419259
YGL212W	VAM7	34		ATATTGATGGCA	0.419329
YKR048C	NAP1	19		AAGATCATGTCA	0.419553
YOR280C	FSH3	12		ATTATTATGAGT	0.419897
YER007W	PAC2	21		GATAGCATGACT	0.41996
YOR352W		75		ATTTTGATGTCT	0.420111
YJL091C	GWT1	8		AAGAATATGTCG	0.420359
YOL092W		41		TCAATTATGCAA	0.420406
YIL106W	MOB1	16		ATTTCCATGTCT	0.420627
YMR192W	GYL1	89		TAACAGATGAAT	0.420763
YDL203C	ACK1	199		TAGGCAATGGTT	0.420887
YDR477W	SNF1	294		GTCAACATGAGC	0.420975
YBR236C	ABD1	38		AGTAGAATGTCA	0.421084
YLR173W		66		TTTAAGATGCAC	0.421513
YOR359W	VTS1	70		GAAATCATGAAA	0.4216
YNL323W	LEM3	44		TGAAGAATGGTA	0.42197
YDR137W	RGP1	100		GAAGATATGCGT	0.422044
YOL086W-A		48		GATGCAATGAAT	0.422054
YHR012W	VPS29	21		TAAATTATGTTG	0.422137
YLR405W	DUS4	7		AAGAAAATGCAC	0.422172
YOR142W	LSC1	193		TTGATAATGTTA	0.422238
YNL313C	EMW1	15		AAAATTATGGAG	0.422303
YBR185C	MBA1	19		TATGAGATGAGT	0.422351
YHR159W		75		ACTGATATGAAT	0.422372
YGR218W	CRM1	299		CATAATATGGAA	0.422376
YJL148W	RPA34	57		ATTGATATGTCC	0.422383
YOR360C	PDE2	232		ATTGATATGTCC	0.422383
YPR138C	MEP3	230		GTTCACATGGCT	0.422446
YBR253W	SRB6	61		AAGAAAATGAGC	0.422449
YPL164C	MLH3	51		AAGAAAATGAGC	0.422449
YDL030W	PRP9	61		ATCTCAATGAAT	0.422573
YJR148W	BAT2	57		AACGATATGACC	0.422794
YMR214W	SCJ1	30		AGGACAATGATT	0.422807
YKL112W	ABF1	167		ACAAGGATGGAC	0.423134
YJL047C-A		54		ATCGAAATGAAG	0.423145
YJL174W	KRE9	115		TAGATAATGCGT	0.42315
YGL056C	SDS23	98		CACCCAATGCCT	0.423388
YHR118C	ORC6	28		CCAGTCATGTCC	0.423745
YOR368W	RAD17	31		TCAACTATGCGA	0.423882
YLR227C	ADY4	359		CGTATAATGAAT	0.423902
YIL134W	FLX1	24		GATAATATGGTC	0.424005
YBR132C	AGP2	152		CCAAGCATGACA	0.424114
YKL069W		8		ACAGATATGGGC	0.424137
YML120C	NDI1	60		ACCACTATGCTA	0.424336
YDL101C	DUN1	13		GTGAAGATGAGT	0.424456
YNL315C	ATP11	10		ATAACTATGTGG	0.424464
YNL158W	PGA1	1624		AAGAAGATGGTC	0.424527
YBR169C	SSE2	25		AATATAATGAGC	0.424672
YJR001W	AVT1	72		ACGCAAATGCCT	0.424759
YLR196W	PWP1	74		TAACTAATGATT	0.424801
YJR040W	GEF1	55		ACACTAATGCCA	0.424868
YMR074C		12		TCAGATATGGAC	0.425021
YML069W	POB3	57		AGAATTATGAGT	0.425023
YLR020C	YEH2	39		ATAAGCATGGTA	0.425157
YJR056C		166		TCAATTATGGAG	0.425211
YML094W	GIM5	17		CAAGCCATGTCC	0.425211
YAL040C	CLN3	321		TGTACGATGGCC	0.425232
YIL091C	UTP25	31		ATTGTAATGAGT	0.425238
YOR344C	TYE7	132		ACAATTATGAAC	0.425407
YLR137W		7		GGCAGAATGGCA	0.425438
YLR150W	STM1	26		TTCTCAATGTCC	0.425494
YKL137W	CMC1	66		GATAAGATGGAG	0.425508
YHR181W	SVP26	33		AAAACCATGCTG	0.42568
YAL047C	SPC72	29		ATAGCCATGGTA	0.425723
YKL018C-A		41		TGCAAGATGTTG	0.425865
YER014W	HEM14	54		TGTATAATGTTA	0.42601
YDL044C	MTF2	25		CATACAATGATC	0.426032
YNL310C	ZIM17	15		CTGAACATGATT	0.426032
YOR109W	INP53	101		CATAGAATGATT	0.426032
YGL012W	ERG4	41		ATCGCTATGGCA	0.426245
YGR246C	BRF1	14		ATACCAATGCCA	0.426338
YOR228C		220		ATTACGATGATA	0.426365
YGL246C	RAI1	29		ATCCCAATGGGT	0.426464
YIL084C	SDS3	42		AGATTGATGGCT	0.426573
YPL221W	FLC1	231		TTAAGAATGCAA	0.426659
YGL145W	TIP20	70		AAAACTATGAAC	0.426879
YLR387C	REH1	52		TGAAAGATGAGC	0.426939
YPR159W	KRE6	188		ACTCTAATGCCT	0.426995
YHR108W	GGA2	38		TGCATCATGTCC	0.427165
YIL017C	VID28	70		TACACTATGACG	0.42737
YKR025W	RPC37	31		TTATAGATGAGT	0.427507
YMR061W	RNA14	24		AGAGATATGTCC	0.427539
YPL101W	ELP4	39		TGTACCATGTCA	0.42769
YGR057C	LST7	63		CATAGAATGTCC	0.427804
YHR170W	NMD3	42		AAAAGGATGGAA	0.427866
YDR081C	PDC2	87		ACCAGCATGCTT	0.428127
YDL040C	NAT1	27		CGAAGTATGTCT	0.428157
YML110C	COQ5	27		GATATAATGTTG	0.428248
YDL237W	AIM6	23		TAAGCGATGTTA	0.428268
YLR450W	HMG2	158		CCTCAAATGTCA	0.428455
YPL029W	SUV3	46		ACTAGCATGGCA	0.428525
YBR273C	UBX7	31		AACCAAATGTTA	0.428583
YHR001W-A	QCR10	66		ACCTCAATGGCG	0.428643
YDR436W	PPZ2	253		AGTACCATGGGT	0.428665
YER068W	MOT2	67		GTCATAATGATG	0.428665
YDL248W	COS7	7		CCGAAAATGAAA	0.428827
YHL048W	COS8	7		CCGAAAATGAAA	0.428827
YJR142W		16		AATACAATGAAG	0.428846
YCL051W	LRE1	280		AGGAAAATGCCC	0.428938
YDR165W	TRM82	42		TTTACAATGAGC	0.429076
YHR044C	DOG1	50		AGGATAATGGCA	0.429174
YPL074W	YTA6	20		AGGATAATGGCA	0.429174
YHR168W	MTG2	34		CTAGATATGTCG	0.429307
YFR015C	GSY1	89		CGAAGTATGGCT	0.429499
YBL067C	UBP13	283		GCAATCATGATC	0.429553
YPL269W	KAR9	12		ACTGCCATGGAT	0.429623
YCR081W	SRB8	14		AACGCGATGAAT	0.429653
YLL031C	GPI13	53		CGTAATATGGAT	0.429673
YDL107W	MSS2	71		TAAAATATGCAG	0.429729
YBL005W	PDR3	62		ACCGCAATGAAA	0.429734
YOR252W	TMA16	32		CTAATCATGCCG	0.429782
YKL164C	PIR1	75		TAGAAAATGCAA	0.429832
YER163C		8		GGCCAAATGACT	0.429855
YDR354W	TRP4	76		CTTATCATGTCC	0.430056
YHL027W	RIM101	98		CTTAAGATGGTG	0.430091
YER159C	BUR6	183		TTCTTAATGGCA	0.430113
YOR232W	MGE1	117		TTGAAAATGAGA	0.430114
YKL138C	MRPL31	86		ACTCCAATGTTT	0.430126
YLR390W-A	CCW14	48		ATTATCATGCGT	0.430156
YDR279W	RNH202	78		AAAAGCATGACC	0.430164
YNL169C	PSD1	107		GCCAGCATGTCA	0.430254
YCL005W-A	VMA9	25		AGAGTAATGAGT	0.430429
YKL068W-A		45		ACTACAATGCAG	0.430618
YOR104W	PIN2	189		ACAGTAATGAAC	0.430818
YKL161C	KDX1	68		AATTAAATGGCG	0.430856
YNR041C	COQ2	28		CAACTAATGTTT	0.430858
YEL016C	NPP2	183		TACGATATGCTT	0.430995
YJL127C-B		99		GAAAGCATGATT	0.431039
YER088C	DOT6	89		TCCGTGATGTCC	0.431131
YOL013C	HRD1	167		AATAATATGGTG	0.431402
YHL007C	STE20	137		CAAGAAATGAGC	0.431441
YDR531W	CAB1	50		ATCGCAATGCCG	0.431622
YDR485C	VPS72	21		TGCACGATGAGT	0.431646
YOR081C	TGL5	37		GTTGCTATGTCT	0.431722
YHR072W	ERG7	66		AAACAGATGACA	0.431778
YPR125W	YLH47	96		GACACAATGCTG	0.431926
YER070W	RNR1	39		AACATCATGTAC	0.431963
YGL219C	MDM34	27		ATCGTCATGTCA	0.432008
YPL011C	TAF3	31		TCTGCTATGACT	0.432015
YOR236W	DFR1	14		ACGAGCATGGCT	0.432069
YDL045W-A	MRP10	24		CCATTAATGTCC	0.432108
YDR428C	BNA7	33		GTGAATATGTCA	0.43219
YOR354C	MSC6	25		ATACAGATGCTT	0.432309
YKR052C	MRS4	71		AATATTATGAAT	0.432318
YOL043C	NTG2	83		TATATAATGAGA	0.432378
YHR049W	FSH1	42		CGAAGGATGACT	0.432402
YMR221C		13		ACTGTAATGACC	0.432444
YJL192C	SOP4	39		GTGACGATGTTT	0.432557
YKL023W		13		GCAAGCATGAAT	0.432821
YKL059C	MPE1	70		TGTAACATGAGT	0.432909
YMR237W	BCH1	71		CTAACCATGTTG	0.432933
YGR287C	IMA1	135		CTATCGATGACT	0.432978
YLR118C		35		TCGAATATGAAT	0.433015
YPL219W	PCL8	42		AGCAGTATGGCT	0.433032
YDL201W	TRM8	17		GTTAAGATGAAA	0.433428
YOR038C	HIR2	51		GGAACAATGAGA	0.433476
YPL004C	LSP1	25		ACAAGAATGCAC	0.433518
YHR058C	MED6	44		CGCAAAATGAAC	0.433623
YHR196W	UTP9	54		TGCACAATGGGC	0.433625
YLL019C	KNS1	513		TTAGTTATGTCA	0.433714
YLR203C	MSS51	56		AGAACTATGACC	0.43372
YGR102C		14		AGAACGATGTAC	0.433897
YGR148C	RPL24B	421		AGAACAATGAAG	0.434081
YLR275W	SMD2	55		TTTATCATGTCG	0.434083
YDR483W	KRE2	26		GAAAGCATGGCC	0.434189
YIL004C	BET1	11		ACACAGATGAGT	0.43438
YJL155C	FBP26	128		AGAAACATGGGG	0.434484
YLL028W	TPO1	134		GAGACAATGTCG	0.43454
YBR152W	SPP381	68		CATACGATGAGT	0.434567
YBL038W	MRPL16	63		TGCAACATGTTC	0.434729
YNL177C	MRPL22	49		AAGAAAATGAAC	0.434945
YMR121C	RPL15B	35		CAAGCAATGGGA	0.434962
YMR083W	ADH3	54		ACCATCATGTTG	0.434989
YDR421W	ARO80	65		TCCTCTATGTCT	0.43523
YNR012W	URK1	92		TTTATTATGTCC	0.435306
YDL004W	ATP16	43		AGGAAAATGTTA	0.435408
YLR368W	MDM30	54		ATATACATGACA	0.435635
YPR128C	ANT1	55		TCATCAATGTTA	0.435749
YKL009W	MRT4	42		TGAATCATGCCA	0.435779
YKR020W	VPS51	17		GTACAGATGGCA	0.435819
YBR274W	CHK1	50		ATTACTATGAGT	0.435892
YGR002C	SWC4	9		GGTAATATGTCA	0.436051
YPL007C	TFC8	38		TTCATAATGAAG	0.436091
YCR095C	OCA4	38		TTCATAATGCTG	0.436091
YBR229C	ROT2	9		TGCAACATGGTC	0.436091
YOR164C	GET4	41		CAAGCTATGGTT	0.436094
YKR083C	DAD2	48		GTTATTATGGAT	0.436363
YPL241C	CIN2	8		GCATAAATGGAC	0.436436
YDR286C		6		ATCACCATGTTG	0.436494
YNL027W	CRZ1	109		AGGAAGATGTCA	0.436588
YPL024W	RMI1	53		GATGGAATGTCT	0.436632
YBL105C	PKC1	266		ACAGTCATGAGT	0.436667
YBR281C	DUG2	49		GAAATCATGTAC	0.436699
YOR260W	GCD1	44		GTAGTCATGTCA	0.436744
YOL011W	PLB3	756		TAAGTAATGATA	0.43683
YLR436C	ECM30	84		TGCATAATGGGA	0.436961
YOR349W	CIN1	27		TCAATCATGAAC	0.436995
YFR005C	SAD1	44		TTTATAATGGAG	0.437033
YLR056W	ERG3	78		TGAGATATGGAT	0.437198
YOR372C	NDD1	70		CCAACTATGGAC	0.437314
YDR307W		59		CAAAACATGAAG	0.437392
YKL125W	RRN3	83		GACAAGATGATG	0.437437
YER080W	AIM9	31		CCAAGCATGATT	0.437482
YOR294W	RRS1	46		TTCTAGATGTCA	0.437543
YGL127C	SOH1	51		CCCAGGATGTCA	0.437659
YOL137W	BSC6	56		TTCAGCATGGAT	0.437811
YDL074C	BRE1	72		TCAGATATGACG	0.43788
YBR280C	SAF1	23		CACATCATGAGT	0.437911
YBL089W	AVT5	64		CTCAATATGCCG	0.437928
YPL159C	PET20	93		TAAACTATGTTG	0.438218
YOR181W	LAS17	65		TTTAATATGGGA	0.438264
YNR050C	LYS9	39		TTTAATATGGGA	0.438264
YMR177W	MMT1	137		TTGACAATGTTA	0.438323
YOR112W	CEX1	70		TAAGTGATGAAT	0.438552
YPL105C	SYH1	23		TAAGTGATGAAT	0.438552
YDR222W		36		TTAGTGATGCTT	0.438552
YKL212W	SAC1	201		CTAGATATGACA	0.438669
YNL187W	SWT21	183		TTCAGAATGGAA	0.43887
YNR024W	MPP6	16		CAACAAATGAGT	0.438894
YGR239C	PEX21	21		AATACCATGCCC	0.438959
YBL042C	FUI1	56		GAGAAAATGCCG	0.439015
YPL268W	PLC1	31		ATATGAATGACT	0.439237
YNR030W	ALG12	61		TTGACAATGCGT	0.43927
YBR036C	CSG2	48		AGCGTCATGTCT	0.439471
YDL097C	RPN6	45		AACTTCATGTCT	0.439471
YCR071C	IMG2	37		AAAACTATGATC	0.439794
YJR076C	CDC11	77		CCAGCCATGTCC	0.439887
YFR052W	RPN12	27		ATCGTAATGCCC	0.440065
YHR046C	INM1	31		TATACCATGACC	0.440162
YDR252W	BTT1	8		CATCAAATGCCT	0.440262
YOR056C	NOB1	69		CATAATATGACC	0.440279
YDR347W	MRP1	64		AGCACCATGCTT	0.440393
YDL013W	SLX5	135		AATAGAATGCAT	0.440561
YBR114W	RAD16	88		AAAATCATGCAA	0.440673
YNL280C	ERG24	73		AAAAGGATGGTA	0.440811
YKL109W	HAP4	271		AGAATCATGACC	0.440962
YGR220C	MRPL9	10		ATAGCCATGTCG	0.440969
YNL048W	ALG11	27		GCGAAAATGGGC	0.441118
YOR220W	RCN2	24		GGAATTATGGCA	0.441148
YOL133W	HRT1	34		TTCAACATGAGC	0.441227
YDR280W	RRP45	108		AGACAAATGGCC	0.441251
YLR399C	BDF1	46		TACGTAATGACC	0.441272
YLL013C	PUF3	242		GTATAAATGGAA	0.441317
YJL203W	PRP21	34		GTATAAATGGAA	0.441317
YIL036W	CST6	150		AGGATAATGTTT	0.441319
YDR444W		85		CCCTTAATGCCT	0.441371
YLR238W	FAR10	78		AATCCAATGACT	0.441437
YOL090W	MSH2	38		AAAAGTATGTCC	0.441624
YJL079C	PRY1	164		TAAATCATGAAA	0.441882
YLR347C	KAP95	120		GGAGCAATGTCC	0.441962
YLR443W	ECM7	137		AAATAAATGGTG	0.442223
YKL057C	NUP120	49		CCTATTATGGCA	0.442342
YIL146C	ATG32	356		AAACATATGGTT	0.442398
YML070W	DAK1	44		TTTTAAATGTCC	0.442452
YLR326W		150		TATCAAATGTCA	0.442452
YJR032W	CPR7	12		AACGCGATGATT	0.442652
YOR356W		27		GGGAAAATGATT	0.442815
YJR103W	URA8	59		TTGAAAATGAAA	0.442837
YPL019C	VTC3	135		TTGAAAATGCTA	0.442837
YLR008C	PAM18	98		AATATCATGAGT	0.44317
YDR143C	SAN1	146		TTCATTATGAGT	0.443257
YHR041C	SRB2	11		TCCATCATGGGA	0.443294
YPL096W	PNG1	25		GTAGCAATGGGA	0.443348
YKL103C	LAP4	54		AAAAGAATGGAG	0.443376
YOR193W	PEX27	56		TTTATCATGACA	0.443549
YDR408C	ADE8	46		AAAGCTATGGCC	0.443598
YGL209W	MIG2	47		AAGAGAATGCCT	0.443658
YLR297W		99		CAGAAAATGGTC	0.443743
YER173W	RAD24	30		AATGATATGGAT	0.443777
YLR340W	RPP0	60		TTTGAAATGGGA	0.443839
YJL094C	KHA1	45		TATCAAATGGCA	0.443839
YGL070C	RPB9	25		ACTGCTATGACT	0.443869
YNL243W	SLA2	53		AACAGGATGTCC	0.443902
YLR130C	ZRT2	116		GAAAGTATGGTT	0.44391
YJL159W	HSP150	54		AATATAATGCAA	0.443951
YML006C	GIS4	154		AATATAATGCAA	0.443951
YDR419W	RAD30	10		CAAAGCATGTCA	0.444214
YFL037W	TUB2	65		AATATAATGAGA	0.444242
YER038C	KRE29	10		TCACAAATGGGA	0.444289
YNL153C	GIM3	37		ACCATTATGGAA	0.444304
YDR322C-A	TIM11	18		TAAAGGATGTCG	0.444404
YLR307W	CDA1	77		AAAGAGATGAAA	0.444551
YGR028W	MSP1	150		AGCCCAATGTCT	0.444722
YPL190C	NAB3	94		CAAGCCATGTCA	0.444806
YDR186C		84		ACTACGATGGAC	0.444849
YAL017W	PSK1	367		GAAGTAATGCCC	0.44489
YFL049W	SWP82	31		ACGAATATGCTT	0.444896
YKR003W	OSH6	89		GTTACAATGGGC	0.444975
YMR305C	SCW10	137		TCCATTATGCGT	0.445089
YGL018C	JAC1	35		AGCACAATGTTG	0.445109
YGL216W	KIP3	267		ACTAACATGAAC	0.44519
YPL217C	BMS1	44		GAAACGATGGAG	0.445483
YGR280C	PXR1	28		AGCAGAATGGGT	0.445523
YPL104W	MSD1	41		TTAATCATGTTG	0.445535
YGR187C	HGH1	56		TGAGTGATGACT	0.445581
YPL228W	CET1	143		CCCACTATGAGT	0.445585
YOR125C	CAT5	66		GAAATTATGTTA	0.445928
YOR020W-A		26		ATCTCAATGGGT	0.446116
YMR288W	HSH155	21		GTCATCATGAGT	0.446353
YGL050W	TYW3	23		TAACTCATGGCT	0.446543
YPL199C		12		AAAACTATGAAA	0.44655
YLR438C-A	LSM3	62		AAGAAAATGGAG	0.446674
YER122C	GLO3	81		GCGACAATGAGT	0.446691
YAL034C	FUN19	635		GGAAACATGGGA	0.446713
YFR033C	QCR6	106		TAGAAAATGGGC	0.446914
YML035C	AMD1	164		AAAATTATGGAC	0.446966
YOR243C	PUS7	17		CATGCCATGTCT	0.447033
YKL157W	APE2	24		CATAATATGCCA	0.447043
YEL052W	AFG1	35		AAAATCATGATC	0.447138
YPL051W	ARL3	35		GCACACATGTTT	0.447155
YPR089W		39		TGAACAATGAAC	0.447161
YDR282C		7		TGAAGAATGCTT	0.447161
YDR022C	CIS1	28		ACAGGAATGAAT	0.447229
YCR072C	RSA4	26		ATACAGATGTCC	0.447241
YLR220W	CCC1	153		AATATTATGTCC	0.44725
YMR299C	DYN3	19		GTATTAATGGAT	0.447308
YNL097C	PHO23	108		GTACAAATGAGT	0.447355
YLR208W	SEC13	90		ATACAAATGGTC	0.44743
YNL061W	NOP2	43		TAGGAAATGGGT	0.447509
YMR070W	MOT3	210		TGAGCAATGAAT	0.447757
YHR045W		130		TGAGCAATGAAT	0.447757
YIL062C	ARC15	27		CAAGCAATGGAA	0.447829
YPL222W	FMP40	123		ACAATCATGGGG	0.447845
YOR174W	MED4	102		AATGTTATGTCT	0.447846
YDR150W	NUM1	62		TCGAATATGTCC	0.447972
YPL076W	GPI2	146		GGTACAATGACA	0.447982
YGR065C	VHT1	126		TAGATAATGACA	0.448298
YKL058W	TOA2	30		GGATAAATGGCA	0.44839
YGL237C	HAP2	84		AACGCCATGTCA	0.448464
YGL234W	ADE5,7	18		CTCACAATGCTC	0.448504
YPL067C		57		TTTACAATGCAA	0.448555
YDR370C		10		TCAGTTATGTCA	0.448683
YNR032W	PPG1	105		GTAGAGATGGAA	0.44871
YLR316C	TAD3	24		TTAGTTATGGTT	0.448788
YGR103W	NOP7	28		TATACAATGAGA	0.448849
YIL103W	DPH1	50		TTCGTAATGAGT	0.448895
YKL082C	RRP14	83		ACTGAGATGAGT	0.448917
YHL029C	OCA5	26		GCAAATATGCAC	0.448927
YOL080C	REX4	44		GTTTTAATGGCT	0.448996
YIL155C	GUT2	44		TAATATATGTTT	0.449018
YLL011W	SOF1	11		GTTAAAATGAAG	0.44914
YGL031C	RPL24A	504		GATAAAATGAAG	0.44914
YLR451W	LEU3	115		GCAATTATGGAA	0.449174
YLR419W		61		TGATAAATGGCC	0.449257
YMR258C		39		TGACAAATGGCA	0.449257
YGR068C	ART5	36		AAGACCATGTTT	0.449263
YER145C	FTR1	21		CCCGCCATGCCT	0.449317
YML129C	COX14	10		ATAGTCATGTCC	0.449595
YBR259W		46		ATAGTCATGTCC	0.449595
YKL117W	SBA1	31		ATAGTCATGTCC	0.449595
YPL226W	NEW1	29		CTCAGGATGCCT	0.44972
YKL019W	RAM2	19		TCGAAAATGGAG	0.449749
YKL144C	RPC25	12		GGTAATATGTTT	0.449796
YLR272C	YCS4	52		TATGAGATGTCC	0.449865
YPR047W	MSF1	60		ACTTCAATGTTT	0.449947
YGR041W	BUD9	315		TATGAAATGACG	0.450055
YNL090W	RHO2	159		CGTACTATGTCT	0.45013
YNL071W	LAT1	31		CGTACTATGTCT	0.45013
YHR179W	OYE2	41		TCGATAATGCCA	0.450151
YCL059C	KRR1	25		CAAACGATGGTG	0.450281
YDR490C	PKH1	85		ATTAATATGGGA	0.45029
YGR082W	TOM20	47		TCTATTATGTCC	0.45033
YKR098C	UBP11	137		AAGACAATGTTA	0.45035
YHR200W	RPN10	15		CGCACAATGGTA	0.450389
YPR036W	VMA13	56		GGAACAATGGGC	0.450407
YDR414C	ERD1	197		CAAAATATGGAG	0.450452
YMR185W		22		TGGAAAATGAAT	0.450487
YPR111W	DBF20	37		GTAGTCATGTTT	0.45051
YNL022C		25		AAAAGCATGAAT	0.450539
YOR380W	RDR1	208		CACCAAATGGCA	0.450606
YPR183W	DPM1	37		CCCACAATGAGC	0.450653
YMR128W	ECM16	46		ATAAGTATGGGT	0.450661
YML071C	COG8	76		AGTAAAATGGAG	0.450664
YDR528W	HLR1	318		GCTGAAATGGAA	0.451042
YEL036C	ANP1	145		TCCATAATGAAG	0.451142
YGL066W	SGF73	191		GCTAAAATGAGG	0.451292
YER169W	RPH1	224		GAAATCATGACG	0.451322
YBR262C	AIM5	35		AGAATCATGTCG	0.451438
YER007C-A	TMA20	40		GAGGAAATGTTT	0.451485
YBR130C	SHE3	60		TGTAAGATGTCG	0.451709
YBR283C	SSH1	144		TTTAGTATGTCT	0.451888
YGL041W-A		7		CACATAATGCTA	0.451955
YJR059W	PTK2	70		AAGATAATGGCG	0.452182
YPL066W		170		GTGAAAATGACG	0.452298
YMR004W	MVP1	60		AAAGTAATGGAC	0.452651
YDL148C	NOP14	30		AAATACATGGCC	0.452651
YIL041W	GVP36	22		TCATCAATGTCG	0.452768
YPL139C	UME1	56		CTTAAAATGAGC	0.452979
YGR111W		40		ATTAGAATGACA	0.453333
YAL044C	GCV3	9		TCGACAATGTTA	0.453451
YNL067W	RPL9B	33		CTAAAGATGAAG	0.453496
YGL071W	AFT1	458		ACGACAATGGAA	0.453629
YDR378C	LSM6	18		TTAGTGATGTCC	0.4537
YFR003C	YPI1	55		ATAAGGATGAGT	0.453707
YDR412W	RRP17	49		TTTGCTATGGCT	0.453909
YKL100C		23		TACACGATGGAC	0.453931
YDR295C	HDA2	263		ATCGACATGAGT	0.453937
YLR166C	SEC10	36		TACAACATGAAC	0.454278
YDR142C	PEX7	169		TACAACATGCTC	0.454278
YJR068W	RFC2	70		CTTGAGATGTTT	0.45439
YDL031W	DBP10	52		TAGAATATGGCA	0.454401
YER069W	ARG5,6	49		ATCATTATGCCA	0.454562
YCR016W		26		AATTAAATGTCC	0.454592
YLR382C	NAM2	82		GGAAAAATGCTG	0.454622
YJR060W	CBF1	49		TTAACGATGAAC	0.454653
YLR274W	MCM5	39		CAGATAATGTCA	0.454691
YBL052C	SAS3	228		CAGATAATGTCA	0.454691
YDR440W	DOT1	87		ACAGTAATGGGC	0.45482
YNL001W	DOM34	63		AAAAATATGAAG	0.454879
YML019W	OST6	13		AAAAATATGAAG	0.454879
YLR042C		86		AAAAATATGAAG	0.454879
YGR129W	SYF2	41		CGAAGAATGGAT	0.454959
YDL199C		50		AAGAAAATGAAA	0.454988
YOR265W	RBL2	34		CTATCAATGGCA	0.455006
YDL184C	RPL41A	22		ATCGAAATGAGA	0.455035
YGR177C	ATF2	63		TTAATTATGGAA	0.455076
YFR010W	UBP6	82		TAAAATATGAGC	0.455124
YBR218C	PYC2	62		TAAAATATGAGC	0.455124
[truncated: 2,281 more rows]

## Sheet: AUG_uORFs_identified
uORF_name	Gene	Chromosome	Start	End	Strand	Distance_from_5' eng	Distance_to_main_aug	Length	Context	Context score
YAL004W_374	YAL004W	chrI	139170	139259	+	374	-1589	90	GGTATGA	0.143688
YAL014C_34	YAL014C	chrI	129020	129038	-	34	-19	19	TAGATGC	0.248108
YAL034C_85	YAL034C	chrI	82430	82501	-	85	-550	72	TGAATGG	0.2045
YAL040C_6	YAL040C	chrI	67824	67835	-	6	-315	12	CAAATGG	0.393993
YAL063C-A_160	YAL063C-A	chrI	23447	23473	-	160	-788	27	TGCATGC	0.107273
YAL063C-A_720	YAL063C-A	chrI	22854	22913	-	720	-228	60	GTGATGA	0.263152
YAL063C-A_888	YAL063C-A	chrI	22701	22745	-	888	-60	45	CTAATGT	0.274381
YAL064W-B_116	YAL064W-B	chrI	11428	11439	+	116	-617	12	AAAATGT	0.992982
YAL064W-B_89	YAL064W-B	chrI	11401	11439	+	89	-644	39	ATAATGC	0.54367
YAR008W_27	YAR008W	chrI	158890	158964	+	27	-75	75	TATATGG	0.261328
YAR008W_67	YAR008W	chrI	158930	158964	+	67	-35	35	TATATGC	0.20258
YAR023C_840	YAR023C	chrI	180050	180094	-	840	-274	45	GAAATGT	0.612304
YAR023C_932	YAR023C	chrI	179943	180002	-	932	-182	60	AACATGC	0.524564
YAR027W_17	YAR027W	chrI	183687	183701	+	17	-82	15	ATCATGA	0.393414
YBL009W_12	YBL009W	chrII	207171	207188	+	12	-22	18	TACATGC	0.228723
YBL014C_18	YBL014C	chrII	201751	201759	-	18	-11	9	TCTATGG	0.199362
YBL018C_28	YBL018C	chrII	186475	186487	-	28	-13	13	TAAATGG	0.436024
YBL020W_1	YBL020W	chrII	182319	182357	+	1	-81	39	NA	NA
YBL039W-B_1	YBL039W-B	chrII	143188	143235	+	1	-204	48	NA	NA
YBL057C_3	YBL057C	chrII	113428	113444	-	3	-17	17	AACATGA	0.56095
YBL070C_75	YBL070C	chrII	92079	92147	-	75	-1222	69	TAAATGG	0.436024
YBL092W_135	YBL092W	chrII	45747	45755	+	135	-230	9	AAAATGA	0.828966
YBR005W_12	YBR005W	chrII	245828	245848	+	12	-77	21	CTCATGC	0.144948
YBR013C_58	YBR013C	chrII	266165	266182	-	58	-301	18	TAGATGA	0.265319
YBR028C_25	YBR028C	chrII	296026	296058	-	25	-56	33	CCTATGA	0.149333
YBR043C_85	YBR043C	chrII	323946	324009	-	85	-64	64	CATATGT	0.234479
YBR044C_19	YBR044C	chrII	326065	326073	-	19	-14	9	CTTATGC	0.12838
YBR086C_229	YBR086C	chrII	423068	423103	-	229	-62	36	TTTATGG	0.183278
YBR114W_3	YBR114W	chrII	467162	467188	+	3	-85	27	GTAATGC	0.335244
YBR131W_2	YBR131W	chrII	497149	497161	+	2	-13	13	NA	NA
YBR158W_47	YBR158W	chrII	556332	556340	+	47	-216	9	TATATGT	0.259494
YBR168W_123	YBR168W	chrII	572213	572266	+	123	-157	54	TTTATGC	0.142076
YBR168W_176	YBR168W	chrII	572266	572355	+	176	-104	90	TTGATGA	0.186077
YBR174C_90	YBR174C	chrII	583177	583320	-	90	-668	144	TCAATGC	0.257856
YBR187W_15	YBR187W	chrII	602519	602536	+	15	-114	18	TTTATGA	0.151931
YBR208C_226	YBR208C	chrII	642396	642431	-	226	-221	36	CAGATGA	0.239742
YBR208C_54	YBR208C	chrII	642568	642603	-	54	-393	36	ATAATGA	0.581382
YBR208C_8	YBR208C	chrII	642617	642649	-	8	-439	33	GAAATGT	0.612304
YBR213W_29	YBR213W	chrII	650326	650343	+	29	-41	18	TTCATGA	0.171538
YBR239C_136	YBR239C	chrII	699944	699956	-	136	-13	13	TTGATGA	0.186077
YBR242W_34	YBR242W	chrII	704563	704601	+	34	-106	39	TGAATGG	0.2045
YBR253W_24	YBR253W	chrII	723232	723268	+	24	-37	37	GTGATGA	0.263152
YBR259W_9	YBR259W	chrII	730349	730385	+	9	-37	37	TATATGA	0.216632
YBR270C_75	YBR270C	chrII	744578	744595	-	75	-197	18	CGAATGA	0.153182
YBR274W_31	YBR274W	chrII	749574	749592	+	31	-19	19	TATATGG	0.261328
YBR280C_8	YBR280C	chrII	764698	764712	-	8	-15	15	TAAATGG	0.436024
YBR292C_341	YBR292C	chrII	785373	785489	-	341	-416	117	GGAATGA	0.239742
YBR298C_48	YBR298C	chrII	804795	804824	-	48	-349	30	GTTATGT	0.257375
YCL029C_34	YCL029C	chrIII	69922	69937	-	34	-16	16	TGTATGC	0.0950119
YCR007C_180	YCR007C	chrIII	127202	127210	-	180	-480	9	GCGATGA	0.286246
YCR019W_84	YCR019W	chrIII	152772	152816	+	84	-64	45	TACATGA	0.244588
YCR023C_21	YCR023C	chrIII	160379	160429	-	21	-56	51	GGAATGC	0.224191
YCR028C_17	YCR028C	chrIII	172472	172525	-	17	-101	54	GAAATGA	0.511166
YCR045W-A_164	YCR045W-A	chrIII	208297	208359	+	164	-453	63	TCTATGT	0.197963
YCR095W-A_130	YCR095W-A	chrIII	289605	289622	+	130	-33	18	AATATGA	0.496834
YCR095W-A_23	YCR095W-A	chrIII	289498	289590	+	23	-140	93	AATATGG	0.599342
YDL002C_43	YDL002C	chrIV	447582	447620	-	43	-42	39	TGGATGA	0.124437
YDL027C_32	YDL027C	chrIV	404958	404971	-	32	-14	14	CATATGA	0.195749
YDL028C_159	YDL028C	chrIV	403292	403308	-	159	-17	17	TGGATGA	0.124437
YDL049C_16	YDL049C	chrIV	366005	366034	-	16	-160	30	ATTATGT	0.417389
YDL049C_81	YDL049C	chrIV	365949	365969	-	81	-95	21	TCGATGA	0.202406
YDL059C_15	YDL059C	chrIV	344966	345019	-	15	-66	54	CACATGC	0.206674
YDL069C_121	YDL069C	chrIV	333811	333822	-	121	-12	12	ATAATGA	0.581382
YDL069C_82	YDL069C	chrIV	333847	333861	-	82	-51	15	TCTATGG	0.199362
YDL073W_136	YDL073W	chrIV	326562	326609	+	136	-50	48	CGTATGC	0.0858529
YDL074C_40	YDL074C	chrIV	326150	326181	-	40	-32	32	TTTATGC	0.142076
YDL076C_44	YDL076C	chrIV	321641	321655	-	44	-103	15	TCCATGA	0.186592
YDL133W_80	YDL133W	chrIV	222371	222394	+	80	-55	24	TGAATGA	0.169523
YDL138W_150	YDL138W	chrIV	213324	213349	+	150	-26	26	TATATGG	0.261328
YDL144C_8	YDL144C	chrIV	199733	199741	-	8	-9	9	CTAATGT	0.274381
YDL146W_139	YDL146W	chrIV	192697	192708	+	139	-52	12	CTTATGT	0.164448
YDL176W_34	YDL176W	chrIV	141993	142022	+	34	-103	30	TGAATGG	0.2045
YDL177C_36	YDL177C	chrIV	141722	141749	-	36	-28	28	TTGATGT	0.222893
YDL187C_78	YDL187C	chrIV	126286	126387	-	78	-549	102	CCGATGA	0.182895
YDL203C_100	YDL203C	chrIV	98044	98052	-	100	-99	9	TTTATGA	0.151931
YDL204W_26	YDL204W	chrIV	94132	94284	+	26	-472	153	GGAATGT	0.287177
YDL204W_53	YDL204W	chrIV	94159	94284	+	53	-445	126	AAGATGG	0.734041
YDL204W_96	YDL204W	chrIV	94202	94369	+	96	-402	168	AGGATGA	0.28539
YDL205C_55	YDL205C	chrIV	93848	93874	-	55	-129	27	TGCATGG	0.138382
YDL206W_114	YDL206W	chrIV	90140	90169	+	114	-35	30	TAAATGC	0.338003
YDL243C_21	YDL243C	chrIV	19256	19267	-	21	-701	12	CTCATGG	0.186982
YDL243C_457	YDL243C	chrIV	18775	18831	-	457	-265	57	GTCATGA	0.242591
YDR045C_95	YDR045C	chrIV	548359	548370	-	95	-60	12	TATATGG	0.261328
YDR046C_37	YDR046C	chrIV	550577	550629	-	37	-53	53	TTGATGG	0.224469
YDR048C_2108	YDR048C	chrIV	553458	553541	-	2108	-143	84	CAAATGA	0.326606
YDR065W_20	YDR065W	chrIV	580669	580680	+	20	-17	12	GTAATGA	0.358498
YDR067C_44	YDR067C	chrIV	583466	583475	-	44	-10	10	TATATGT	0.259494
YDR073W_182	YDR073W	chrIV	592338	592403	+	182	-100	66	TTTATGA	0.151931
YDR073W_236	YDR073W	chrIV	592392	592403	+	236	-46	12	TCAATGT	0.3303
YDR073W_48	YDR073W	chrIV	592204	592323	+	48	-234	120	TTGATGA	0.186077
YDR082W_14	YDR082W	chrIV	610362	610412	+	14	-78	51	TATATGA	0.216632
YDR082W_79	YDR082W	chrIV	610427	610439	+	79	-13	13	ATAATGG	0.701334
YDR099W_68	YDR099W	chrIV	652782	652847	+	68	-824	66	CGTATGT	0.109973
YDR123C_56	YDR123C	chrIV	699469	699488	-	56	-20	20	TACATGG	0.295052
YDR124W_156	YDR124W	chrIV	699922	700098	+	156	-392	177	ATAATGG	0.701334
YDR124W_249	YDR124W	chrIV	700015	700098	+	249	-299	84	GCAATGG	0.470417
YDR131C_1	YDR131C	chrIV	718501	718539	-	1	-79	39	NA	NA
YDR132C_15	YDR132C	chrIV	720387	720407	-	15	-104	21	TGAATGT	0.203065
YDR132C_7	YDR132C	chrIV	720392	720415	-	7	-112	24	CTTATGT	0.164448
YDR133C_52	YDR133C	chrIV	721298	721481	-	52	-184	184	AAAATGC	0.775194
YDR160W_45	YDR160W	chrIV	776029	776046	+	45	-133	18	CACATGC	0.206674
YDR164C_22	YDR164C	chrIV	784216	784235	-	22	-20	20	CACATGC	0.206674
YDR183W_24	YDR183W	chrIV	829567	829583	+	24	-17	17	TATATGA	0.216632
YDR206W_104	YDR206W	chrIV	861819	861884	+	104	-234	66	CCTATGA	0.149333
YDR206W_91	YDR206W	chrIV	861806	861850	+	91	-247	45	TGAATGT	0.203065
YDR242W_26	YDR242W	chrIV	946736	946805	+	26	-70	70	TCAATGG	0.332635
YDR245W_67	YDR245W	chrIV	952782	952798	+	67	-17	17	TGCATGT	0.137411
YDR248C_46	YDR248C	chrIV	958340	958359	-	46	-20	20	CGTATGG	0.11075
YDR248C_50	YDR248C	chrIV	958340	958355	-	50	-16	16	TGGATGG	0.150111
YDR253C_85	YDR253C	chrIV	964657	964683	-	85	-118	27	TCCATGG	0.22509
YDR253C_94	YDR253C	chrIV	964657	964674	-	94	-109	18	TATATGT	0.259494
YDR255C_15	YDR255C	chrIV	967841	967852	-	15	-30	12	GAGATGC	0.350878
YDR265W_39	YDR265W	chrIV	998672	998728	+	39	-191	57	CATATGT	0.234479
YDR265W_4	YDR265W	chrIV	998637	998693	+	4	-226	57	ACAATGA	0.632402
YDR275W_60	YDR275W	chrIV	1011638	1011664	+	60	-613	27	AGAATGA	0.388793
YDR306C_4	YDR306C	chrIV	1075196	1075219	-	4	-48	24	AACATGT	0.671938
YDR308C_28	YDR308C	chrIV	1078450	1078462	-	28	-13	13	TATATGC	0.20258
YDR313C_2	YDR313C	chrIV	1090085	1090096	-	2	-17	12	NA	NA
YDR314C_63	YDR314C	chrIV	1092512	1092542	-	63	-31	31	TACATGA	0.244588
YDR334W_112	YDR334W	chrIV	1135879	1135930	+	112	-52	52	TTTATGA	0.151931
YDR350C_14	YDR350C	chrIV	1178175	1178188	-	14	-14	14	TTAATGT	0.303653
YDR357C_13	YDR357C	chrIV	1189604	1189633	-	13	-66	30	TACATGA	0.244588
YDR362C_12	YDR362C	chrIV	1198787	1198795	-	12	-98	9	TTCATGT	0.205478
YDR366C_42	YDR366C	chrIV	1212846	1212857	-	42	-21	12	GAGATGA	0.375217
YDR379W_65	YDR379W	chrIV	1230155	1230165	+	65	-11	11	TTGATGA	0.186077
YDR387C_67	YDR387C	chrIV	1249829	1249900	-	67	-79	72	TCCATGG	0.22509
YDR414C_54	YDR414C	chrIV	1296794	1296829	-	54	-143	36	TTGATGG	0.224469
YDR421W_19	YDR421W	chrIV	1311993	1312007	+	19	-46	15	TATATGA	0.216632
YDR473C_2	YDR473C	chrIV	1405912	1405920	-	2	-66	9	NA	NA
YDR524C_53	YDR524C	chrIV	1488991	1489004	-	53	-14	14	TGGATGT	0.149058
YDR531W_33	YDR531W	chrIV	1498214	1498230	+	33	-17	17	TGCATGC	0.107273
YEL006W_25	YEL006W	chrV	144294	144325	+	25	-32	32	TTGATGA	0.186077
YEL009C_210	YEL009C	chrV	140113	140124	-	210	-361	12	AAAATGG	1
YEL009C_278	YEL009C	chrV	140048	140056	-	278	-293	9	ATTATGT	0.417389
YEL009C_395	YEL009C	chrV	139928	139939	-	395	-176	12	ATCATGT	0.471253
YEL009C_420	YEL009C	chrV	139903	139914	-	420	-151	12	AAGATGT	0.728889
YEL016C_63	YEL016C	chrV	126282	126338	-	63	-120	57	TTGATGG	0.224469
YEL016C_87	YEL016C	chrV	126282	126314	-	87	-96	33	TATATGA	0.216632
YEL023C_104	YEL023C	chrV	110916	111017	-	104	-465	102	TAAATGT	0.432964
YEL023C_126	YEL023C	chrV	110966	110995	-	126	-443	30	AGTATGA	0.23302
YEL028W_119	YEL028W	chrV	98192	98209	+	119	-475	18	GATATGA	0.306363
YEL028W_6	YEL028W	chrV	98079	98135	+	6	-588	57	GCCATGT	0.316091
YEL036C_125	YEL036C	chrV	84553	84572	-	125	-20	20	TTCATGC	0.160411
YEL041W_48	YEL041W	chrV	75884	75907	+	48	-59	24	GAAATGG	0.616632
YEL061C_14	YEL061C	chrV	39632	39646	-	14	-109	15	GGTATGG	0.173334
YEL064C_18	YEL064C	chrV	31240	31250	-	18	-11	11	TACATGT	0.292981
YEL072W_10	YEL072W	chrV	13599	13634	+	10	-120	36	AGTATGG	0.281097
YEL072W_107	YEL072W	chrV	13696	13718	+	107	-23	23	ATCATGC	0.367894
YER041W_22	YER041W	chrV	232400	232408	+	22	-60	9	CCAATGA	0.249162
YER041W_27	YER041W	chrV	232405	232459	+	27	-55	55	GAAATGA	0.511166
YER046W_318	YER046W	chrV	242831	242929	+	318	-348	99	AACATGT	0.671938
YER046W_7	YER046W	chrV	242520	242537	+	7	-659	18	GTAATGA	0.358498
YER050C_11	YER050C	chrV	254388	254423	-	11	-36	36	AAGATGA	0.608495
YER050C_2	YER050C	chrV	254388	254432	-	2	-45	45	NA	NA
YER053C_1	YER053C	chrV	259722	259736	-	1	-97	15	NA	NA
YER066W_138	YER066W	chrV	289487	289522	+	138	-754	36	TAAATGA	0.361449
YER066W_191	YER066W	chrV	289540	289653	+	191	-701	114	ACCATGT	0.512609
YER066W_289	YER066W	chrV	289638	289907	+	289	-603	270	GAAATGT	0.612304
YER076C_1	YER076C	chrV	313596	313637	-	1	-139	42	NA	NA
YER081W_1	YER081W	chrV	322213	322275	+	1	-472	63	NA	NA
YER081W_130	YER081W	chrV	322342	322404	+	130	-343	63	CAAATGG	0.393993
YER081W_22	YER081W	chrV	322234	322275	+	22	-451	42	GCTATGT	0.279962
YER081W_278	YER081W	chrV	322490	322525	+	278	-195	36	GGGATGA	0.175981
YER103W_61	YER103W	chrV	364445	364456	+	61	-143	12	AAAATGT	0.992982
YER115C_10	YER115C	chrV	395021	395074	-	10	-207	54	AGTATGT	0.279125
YER131W_116	YER131W	chrV	423651	423665	+	116	-300	15	AGAATGA	0.388793
YER131W_57	YER131W	chrV	423592	423600	+	57	-359	9	AGTATGT	0.279125
YER159C_21	YER159C	chrV	492112	492120	-	21	-162	9	GCAATGC	0.364664
YER167W_46	YER167W	chrV	517971	517994	+	46	-244	24	TTCATGC	0.160411
YER186C_111	YER186C	chrV	562688	562699	-	111	-74	12	GAAATGA	0.511166
YER186C_58	YER186C	chrV	562714	562752	-	58	-127	39	AGGATGA	0.28539
YER187W_11	YER187W	chrV	565569	565583	+	11	-660	15	ATAATGT	0.696412
YFL009W_14	YFL009W	chrVI	115966	116019	+	14	-178	54	TATATGA	0.216632
YFL010W-A_89	YFL010W-A	chrVI	114918	114929	+	89	-71	12	AACATGG	0.676687
YFL026W_47	YFL026W	chrVI	82105	82158	+	47	-474	54	GATATGT	0.366979
YFL026W_487	YFL026W	chrVI	82545	82556	+	487	-34	12	AAAATGC	0.775194
YFL041W-A_29	YFL041W-A	chrVI	47918	47950	+	29	-815	33	ATCATGA	0.393414
YFL050C_127	YFL050C	chrVI	36492	36500	-	127	-652	9	TGGATGT	0.149058
YFR017C_4	YFR017C	chrVI	182918	182935	-	4	-74	18	GCGATGA	0.286246
YFR022W_122	YFR022W	chrVI	196664	196696	+	122	-168	33	GTGATGC	0.246083
YFR026C_124	YFR026C	chrVI	207085	207117	-	124	-860	33	ATAATGA	0.581382
YFR026C_68	YFR026C	chrVI	207144	207173	-	68	-916	30	TACATGC	0.228723
YFR030W_58	YFR030W	chrVI	213250	213264	+	58	-61	15	TAGATGG	0.32006
YFR048W_14	YFR048W	chrVI	246107	246144	+	14	-38	38	CATATGG	0.236136
YGL031C_107	YGL031C	chrVII	438323	438331	-	107	-397	9	GCAATGT	0.467115
YGL032C_28	YGL032C	chrVII	436900	436941	-	28	-108	42	GATATGT	0.366979
YGL037C_2	YGL037C	chrVII	428025	428033	-	2	-86	9	NA	NA
YGL060W_37	YGL060W	chrVII	389971	390063	+	37	-93	93	AGTATGG	0.281097
YGL063W_129	YGL063W	chrVII	383588	383611	+	129	-65	24	GTGATGA	0.263152
YGL063W_28	YGL063W	chrVII	383487	383501	+	28	-166	15	CGTATGT	0.109973
YGL071W_376	YGL071W	chrVII	371929	371961	+	376	-82	33	TTCATGC	0.160411
YGL079W_6	YGL079W	chrVII	359416	359433	+	6	-27	18	ATAATGG	0.701334
YGL085W_29	YGL085W	chrVII	349605	349614	+	29	-10	10	TAAATGC	0.338003
YGL087C_2	YGL087C	chrVII	346905	346938	-	2	-34	34	NA	NA
YGL090W_9	YGL090W	chrVII	343295	343317	+	9	-23	23	TGGATGA	0.124437
YGL094C_165	YGL094C	chrVII	334466	334479	-	165	-14	14	TGAATGG	0.2045
YGL114W_21	YGL114W	chrVII	293228	293245	+	21	-231	18	ATAATGC	0.54367
YGL125W_21	YGL125W	chrVII	272401	272448	+	21	-118	48	CTAATGC	0.214202
YGL134W_73	YGL134W	chrVII	255638	255649	+	73	-24	12	TCCATGC	0.174488
YGL146C_34	YGL146C	chrVII	229710	229766	-	34	-80	57	CTTATGA	0.137285
YGL158W_329	YGL158W	chrVII	206973	207008	+	329	-59	36	TTCATGC	0.160411
YGL162W_53	YGL162W	chrVII	198043	198078	+	53	-94	36	TTTATGA	0.151931
YGL169W_22	YGL169W	chrVII	186021	186057	+	22	-37	37	TTAATGG	0.305799
YGL180W_162	YGL180W	chrVII	159663	159674	+	162	-401	12	TCGATGG	0.244168
YGL191W_32	YGL191W	chrVII	144736	144750	+	32	-71	15	CGCATGT	0.124165
YGL224C_65	YGL224C	chrVII	78858	78894	-	65	-37	37	TACATGA	0.244588
YGL228W_1	YGL228W	chrVII	67552	67575	+	1	-45	24	NA	NA
YGL256W_369	YGL256W	chrVII	15029	15157	+	369	-129	129	AACATGT	0.671938
YGL257C_49	YGL257C	chrVII	14179	14217	-	49	-60	39	CGCATGA	0.103656
YGL258W_28	YGL258W	chrVII	10470	10478	+	28	-639	9	GTCATGA	0.242591
YGR021W_25	YGR021W	chrVII	527608	527630	+	25	-23	23	GGTATGA	0.143688
YGR024C_20	YGR024C	chrVII	532597	532640	-	20	-44	44	GTCATGT	0.29059
YGR024C_30	YGR024C	chrVII	532607	532630	-	30	-34	24	TTAATGT	0.303653
YGR027C_120	YGR027C	chrVII	534677	534685	-	120	-227	9	TTAATGG	0.305799
YGR027C_61	YGR027C	chrVII	534736	534744	-	61	-286	9	AAGATGA	0.608495
YGR027C_94	YGR027C	chrVII	534703	534711	-	94	-253	9	AATATGT	0.595136
YGR042W_9	YGR042W	chrVII	579465	579474	+	9	-10	10	CGCATGA	0.103656
YGR057C_38	YGR057C	chrVII	605503	605526	-	38	-25	24	TAAATGG	0.436024
YGR065C_16	YGR065C	chrVII	619945	619968	-	16	-110	24	TGCATGA	0.114714
YGR071C_31	YGR071C	chrVII	634064	634089	-	31	-26	26	CATATGT	0.234479
YGR095C_8	YGR095C	chrVII	676366	676404	-	8	-62	39	TATATGG	0.261328
YGR122C-A_56	YGR122C-A	chrVII	735888	735956	-	56	-198	69	ATTATGT	0.417389
YGR122W_15	YGR122W	chrVII	733803	733811	+	15	-131	9	TCTATGT	0.197963
YGR148C_115	YGR148C	chrVII	788056	788085	-	115	-306	30	ACAATGC	0.591381
YGR148C_45	YGR148C	chrVII	788141	788155	-	45	-376	15	GAAATGA	0.511166
YGR154C_26	YGR154C	chrVII	798108	798116	-	26	-248	9	GTTATGA	0.214863
YGR166W_30	YGR166W	chrVII	830464	830493	+	30	-50	30	TATATGG	0.261328
YGR168C_16	YGR168C	chrVII	834487	834507	-	16	-25	21	CTAATGA	0.22906
YGR169C_13	YGR169C	chrVII	835904	835916	-	13	-13	13	AGGATGA	0.28539
YGR174W-A_465	YGR174W-A	chrVII	846323	846385	+	465	-331	63	ACAATGG	0.762881
YGR174W-A_672	YGR174W-A	chrVII	846530	846538	+	672	-124	9	ACTATGG	0.457227
YGR174W-A_715	YGR174W-A	chrVII	846573	846608	+	715	-81	36	ATTATGT	0.417389
YGR188C_27	YGR188C	chrVII	875110	875129	-	27	-20	20	TGAATGT	0.203065
YGR197C_14	YGR197C	chrVII	894307	894327	-	14	-187	21	GGAATGG	0.289207
YGR206W_1	YGR206W	chrVII	910408	910430	+	1	-23	23	NA	NA
YGR221C_71	YGR221C	chrVII	939000	939008	-	71	-16	9	TAGATGC	0.248108
YGR257C_54	YGR257C	chrVII	1007335	1007361	-	54	-56	27	CGTATGA	0.0918082
YGR288W_26	YGR288W	chrVII	1070248	1070291	+	26	-44	44	TAAATGA	0.361449
YGR289C_19	YGR289C	chrVII	1076096	1076125	-	19	-312	30	ACTATGG	0.457227
YHL002W_12	YHL002W	chrVIII	102576	102593	+	12	-35	18	GCAATGC	0.364664
YHL008C_122	YHL008C	chrVIII	94545	94556	-	122	-46	12	TTCATGG	0.20693
YHL010C_5	YHL010C	chrVIII	83722	83752	-	5	-31	31	TGAATGT	0.203065
YHL040C_23	YHL040C	chrVIII	21126	21134	-	23	-163	9	TACATGA	0.244588
YHL040C_31	YHL040C	chrVIII	21112	21126	-	31	-155	15	GTAATGC	0.335244
YHR006W_2	YHR006W	chrVIII	117769	117798	+	2	-44	30	NA	NA
YHR039C_8	YHR039C	chrVIII	186894	186911	-	8	-102	18	CCGATGG	0.22063
YHR048W_40	YHR048W	chrVIII	204497	204526	+	40	-109	30	TAGATGC	0.248108
YHR071W_190	YHR071W	chrVIII	236831	236851	+	190	-172	21	ACAATGC	0.591381
YHR071W_229	YHR071W	chrVIII	236870	236911	+	229	-133	42	AGGATGC	0.266878
YHR072W_4	YHR072W	chrVIII	239035	239055	+	4	-62	21	GTAATGT	0.42943
YHR077C_2	YHR077C	chrVIII	255799	255810	-	2	-54	12	NA	NA
YHR091C_2	YHR091C	chrVIII	286771	286795	-	2	-25	25	NA	NA
YHR114W_20	YHR114W	chrVIII	338030	338081	+	20	-52	52	TGTATGA	0.101602
YHR129C_56	YHR129C	chrVIII	364169	364201	-	56	-48	33	TACATGC	0.228723
YHR129C_62	YHR129C	chrVIII	364169	364195	-	62	-42	27	CTAATGC	0.214202
YHR135C_41	YHR135C	chrVIII	374376	374390	-	41	-80	15	TTCATGT	0.205478
YHR135C_47	YHR135C	chrVIII	374376	374384	-	47	-74	9	TGGATGC	0.116365
YHR138C_2	YHR138C	chrVIII	377707	377769	-	2	-70	63	NA	NA
YHR145C_245	YHR145C	chrVIII	389698	389769	-	245	-432	72	AAGATGA	0.608495
YHR145C_318	YHR145C	chrVIII	389643	389696	-	318	-359	54	AGGATGA	0.28539
YHR145C_582	YHR145C	chrVIII	389397	389432	-	582	-95	36	AAGATGA	0.608495
YHR145C_591	YHR145C	chrVIII	389397	389423	-	591	-86	27	CAAATGA	0.326606
YHR145C_594	YHR145C	chrVIII	389397	389420	-	594	-83	24	ATGATGA	0.426758
YHR145C_658	YHR145C	chrVIII	389339	389356	-	658	-19	18	TCAATGA	0.275743
YHR155W_8	YHR155W	chrVIII	407016	407036	+	8	-86	21	CTGATGG	0.20283
YHR159W_33	YHR159W	chrVIII	417506	417538	+	33	-42	33	TACATGG	0.295052
YHR209W_18	YHR209W	chrVIII	519421	519435	+	18	-15	15	TCAATGG	0.332635
YHR210C_25	YHR210C	chrVIII	521765	521818	-	25	-81	54	AGAATGT	0.465719
YIL002C_126	YIL002C	chrIX	353432	353457	-	126	-26	26	CGTATGA	0.0918082
YIL014W_113	YIL014W	chrIX	326041	326085	+	113	-61	45	CACATGA	0.22101
YIL028W_42	YIL028W	chrIX	301607	301681	+	42	-492	75	TTCATGA	0.171538
YIL028W_457	YIL028W	chrIX	302022	302098	+	457	-77	77	AGGATGA	0.28539
YIL029C_12	YIL029C	chrIX	301324	301350	-	12	-93	27	GTTATGC	0.200926
YIL029C_35	YIL029C	chrIX	301304	301327	-	35	-70	24	CAAATGA	0.326606
YIL031W_141	YIL031W	chrIX	292603	292631	+	141	-29	29	TCTATGT	0.197963
YIL038C_221	YIL038C	chrIX	282653	282669	-	221	-17	17	TGTATGT	0.121705
YIL059C_165	YIL059C	chrIX	247278	247298	-	165	-383	21	ACTATGG	0.457227
YIL059C_496	YIL059C	chrIX	246916	246967	-	496	-52	52	CACATGG	0.26661
YIL059C_509	YIL059C	chrIX	246931	246954	-	509	-39	24	GGAATGA	0.239742
YIL059C_86	YIL059C	chrIX	247366	247377	-	86	-462	12	AATATGG	0.599342
YIL085C_31	YIL085C	chrIX	202044	202054	-	31	-11	11	TAGATGC	0.248108
YIL111W_1	YIL111W	chrIX	155191	155199	+	1	-30	9	NA	NA
YIL119C_99	YIL119C	chrIX	137947	137979	-	99	-102	33	TTCATGG	0.20693
YIL134C-A_43	YIL134C-A	chrIX	97093	97116	-	43	-391	24	ATCATGA	0.393414
YIR018C-A_137	YIR018C-A	chrIX	386275	386319	-	137	-618	45	AGTATGT	0.279125
YIR018C-A_280	YIR018C-A	chrIX	386096	386176	-	280	-475	81	AGGATGG	0.344273
YIR031C_24	YIR031C	chrIX	414726	414776	-	24	-97	51	AAAATGG	1
YJL046W_16	YJL046W	chrX	352374	352384	+	16	-11	11	TTGATGT	0.222893
YJL053W_3	YJL053W	chrX	335852	335866	+	3	-45	15	AAAATGT	0.992982
YJL059W_8	YJL059W	chrX	324936	324947	+	8	-27	12	CATATGA	0.195749
YJL098W_88	YJL098W	chrX	241979	241999	+	88	-102	21	TACATGC	0.228723
YJL103C_112	YJL103C	chrX	230956	230964	-	112	-83	9	CGAATGA	0.153182
YJL106W_112	YJL106W	chrX	220692	220760	+	112	-697	69	CTCATGG	0.186982
YJL106W_39	YJL106W	chrX	220619	220627	+	39	-770	9	AACATGT	0.671938
YJL112W_15	YJL112W	chrX	205294	205303	+	15	-10	10	ATAATGA	0.581382
YJL133W_54	YJL133W	chrX	160595	160603	+	54	-23	9	TTTATGT	0.181992
YJL139C_29	YJL139C	chrX	153027	153053	-	29	-54	27	CTAATGC	0.214202
YJL140W_2	YJL140W	chrX	150868	150894	+	2	-92	27	NA	NA
YJL162C_23	YJL162C	chrX	115630	115655	-	23	-26	26	TTTATGC	0.142076
YJL164C_177	YJL164C	chrX	111187	111201	-	177	-42	15	TGCATGA	0.114714
YJL170C_93	YJL170C	chrX	101780	101794	-	93	-15	15	AGAATGA	0.388793
YJL215C_118	YJL215C	chrX	28747	28755	-	118	-1984	9	AAAATGA	0.828966
YJL215C_615	YJL215C	chrX	28244	28258	-	615	-1487	15	GAAATGT	0.612304
YJR040W_18	YJR040W	chrX	507708	507744	+	18	-37	37	TGAATGT	0.203065
YJR068W_1	YJR068W	chrX	567573	567581	+	1	-69	9	NA	NA
YJR134C_16	YJR134C	chrX	675853	675877	-	16	-25	25	TGTATGG	0.122565
YJR152W_146	YJR152W	chrX	718368	718484	+	146	-1297	117	GTTATGC	0.200926
YJR152W_345	YJR152W	chrX	718567	718695	+	345	-1098	129	GGTATGA	0.143688
YJR154W_113	YJR154W	chrX	725711	725722	+	113	-72	12	TCCATGA	0.186592
YJR154W_56	YJR154W	chrX	725654	725662	+	56	-129	9	GTCATGT	0.29059
YKL005C_12	YKL005C	chrXI	434963	434992	-	12	-115	30	GCAATGA	0.389959
YKL053C-A_11	YKL053C-A	chrXI	339476	339517	-	11	-75	42	TATATGC	0.20258
YKL064W_48	YKL064W	chrXI	317662	317691	+	48	-101	30	TTGATGA	0.186077
YKL098W_9	YKL098W	chrXI	256752	256766	+	9	-17	15	TGGATGT	0.149058
YKL100C_1	YKL100C	chrXI	255461	255482	-	1	-22	22	NA	NA
YKL109W_210	YKL109W	chrXI	232165	232176	+	210	-61	12	TTAATGG	0.305799
YKL109W_22	YKL109W	chrXI	231977	232006	+	22	-249	30	TATATGC	0.20258
YKL132C_14	YKL132C	chrXI	194977	194988	-	14	-122	12	ATAATGA	0.581382
YKL163W_114	YKL163W	chrXI	143702	143800	+	114	-698	99	GGTATGT	0.172117
YKL163W_175	YKL163W	chrXI	143763	143837	+	175	-637	75	CCCATGT	0.201964
YKL163W_56	YKL163W	chrXI	143644	143673	+	56	-756	30	TAAATGT	0.432964
YKL163W_95	YKL163W	chrXI	143683	143724	+	95	-717	42	AAAATGT	0.992982
YKL176C_127	YKL176C	chrXI	118197	118205	-	127	-219	9	TGGATGG	0.150111
YKL190W_6	YKL190W	chrXI	82906	82944	+	6	-40	39	TCAATGG	0.332635
YKL198C_205	YKL198C	chrXI	70312	70323	-	205	-103	12	TCCATGT	0.22351
YKL198C_42	YKL198C	chrXI	70469	70486	-	42	-266	18	TAAATGC	0.338003
YKL222C_12	YKL222C	chrXI	5712	5726	-	12	-106	15	TAGATGT	0.317814
YKL222C_79	YKL222C	chrXI	5648	5659	-	79	-39	12	ATAATGA	0.581382
YKR003W_27	YKR003W	chrXI	445318	445368	+	27	-62	51	TACATGA	0.244588
YKR004C_11	YKR004C	chrXI	448041	448073	-	11	-37	33	AAAATGC	0.775194
YKR022C_33	YKR022C	chrXI	483154	483162	-	33	-23	9	GCAATGT	0.467115
YKR047W_136	YKR047W	chrXI	524289	524369	+	136	-967	81	TCAATGG	0.332635
YKR050W_542	YKR050W	chrXI	527407	527541	+	542	-407	135	TCAATGC	0.257856
YKR058W_90	YKR058W	chrXI	552678	552758	+	90	-91	81	GCTATGC	0.218558
YKR069W_13	YKR069W	chrXI	571462	571482	+	13	-149	21	AGTATGC	0.217905
YKR069W_30	YKR069W	chrXI	571479	571535	+	30	-132	57	AAAATGA	0.828966
YKR069W_54	YKR069W	chrXI	571503	571535	+	54	-108	33	CTTATGT	0.164448
YLL027W_19	YLL027W	chrXII	87215	87238	+	19	-187	24	GTAATGG	0.432465
YLL043W_24	YLL043W	chrXII	49923	49931	+	24	-14	9	CTAATGC	0.214202
YLL055W_26	YLL055W	chrXII	29830	29838	+	26	-278	9	AGCATGC	0.246026
YLR016C_4	YLR016C	chrXII	177419	177454	-	4	-38	36	AGCATGG	0.317373
YLR021W_13	YLR021W	chrXII	183588	183621	+	13	-34	34	AGAATGG	0.46901
YLR037C_184	YLR037C	chrXII	223614	223820	-	184	-761	207	CCTATGA	0.149333
YLR037C_249	YLR037C	chrXII	223723	223755	-	249	-696	33	CTCATGC	0.144948
YLR041W_25	YLR041W	chrXII	228941	228985	+	25	-435	45	GCCATGG	0.318325
YLR047C_19	YLR047C	chrXII	241625	241636	-	19	-229	12	GTTATGG	0.259194
YLR097C_50	YLR097C	chrXII	337279	337296	-	50	-31	18	CACATGT	0.264739
YLR126C_15	YLR126C	chrXII	395570	395578	-	15	-58	9	ATTATGC	0.325844
YLR139C_100	YLR139C	chrXII	423758	423796	-	100	-323	39	TACATGT	0.292981
YLR139C_89	YLR139C	chrXII	423742	423807	-	89	-334	66	TGGATGC	0.116365
YLR152C_127	YLR152C	chrXII	444710	444730	-	127	-42	21	TATATGG	0.261328
YLR152C_97	YLR152C	chrXII	444710	444760	-	97	-72	51	TACATGT	0.292981
YLR174W_164	YLR174W	chrXII	504467	504481	+	164	-123	15	GGCATGA	0.162231
YLR188W_20	YLR188W	chrXII	528246	528275	+	20	-53	30	TACATGA	0.244588
YLR224W_106	YLR224W	chrXII	586422	586462	+	106	-41	41	ACTATGC	0.354439
YLR227C_37	YLR227C	chrXII	592333	592365	-	37	-322	33	ATTATGA	0.348446
YLR233C_24	YLR233C	chrXII	609525	609546	-	24	-22	22	TAAATGA	0.361449
YLR233C_31	YLR233C	chrXII	609528	609539	-	31	-15	12	CACATGC	0.206674
YLR241W_22	YLR241W	chrXII	620439	620471	+	22	-33	33	TGAATGC	0.158527
YLR242C_63	YLR242C	chrXII	623903	623923	-	63	-40	21	CGGATGA	0.112442
YLR263W_61	YLR263W	chrXII	669902	669931	+	61	-437	30	TCAATGA	0.275743
YLR271W_181	YLR271W	chrXII	682564	682608	+	181	-172	45	ATAATGA	0.581382
YLR271W_44	YLR271W	chrXII	682427	682474	+	44	-309	48	AGAATGA	0.388793
YLR273C_160	YLR273C	chrXII	691030	691087	-	160	-58	58	TCTATGC	0.154544
YLR299W_8	YLR299W	chrXII	725883	725909	+	8	-185	27	TATATGT	0.259494
YLR306W_12	YLR306W	chrXII	744095	744149	+	12	-55	55	TAAATGT	0.432964
YLR313C_20	YLR313C	chrXII	762356	762367	-	20	-25	12	ATAATGT	0.696412
YLR328W_122	YLR328W	chrXII	784823	784831	+	122	-89	9	TGCATGG	0.138382
YLR333C_150	YLR333C	chrXII	796197	796217	-	150	-318	21	AATATGA	0.496834
YLR333C_223	YLR333C	chrXII	796121	796144	-	223	-245	24	AGAATGA	0.388793
YLR333C_34	YLR333C	chrXII	796322	796333	-	34	-434	12	GGTATGT	0.172117
YLR333C_81	YLR333C	chrXII	796197	796286	-	81	-387	90	CCGATGC	0.171031
YLR360W_33	YLR360W	chrXII	846061	846101	+	33	-41	41	TTGATGG	0.224469
YLR362W_35	YLR362W	chrXII	849835	849864	+	35	-30	30	AGTATGA	0.23302
YLR375W_18	YLR375W	chrXII	871682	871695	+	18	-14	14	GGCATGT	0.194329
YLR388W_107	YLR388W	chrXII	898227	898235	+	107	-423	9	GAGATGA	0.375217
YLR413W_1	YLR413W	chrXII	951106	951120	+	1	-49	15	NA	NA
YLR427W_24	YLR427W	chrXII	988357	988377	+	24	-70	21	TGGATGT	0.149058
YLR430W_250	YLR430W	chrXII	993385	993432	+	250	-48	48	TGTATGG	0.122565
YLR431C_43	YLR431C	chrXII	1001806	1001817	-	43	-114	12	GGAATGG	0.289207
YLR443W_122	YLR443W	chrXII	1022609	1022623	+	122	-15	15	CTAATGG	0.27632
YLR452C_28	YLR452C	chrXII	1041499	1041510	-	28	-144	12	TGAATGA	0.169523
YLR453C_31	YLR453C	chrXII	1042999	1043034	-	31	-48	36	TATATGT	0.259494
YML007W_77	YML007W	chrXIII	253762	253782	+	77	-85	21	TGCATGA	0.114714
YML009C_32	YML009C	chrXIII	251517	251526	-	32	-10	10	TTTATGT	0.181992
YML023C_18	YML023C	chrXIII	228667	228690	-	18	-26	24	CAAATGG	0.393993
YML027W_100	YML027W	chrXIII	221289	221297	+	100	-116	9	TCTATGT	0.197963
YML043C_148	YML043C	chrXIII	191768	191781	-	148	-14	14	AATATGA	0.496834
YML068W_16	YML068W	chrXIII	137489	137497	+	16	-60	9	GTCATGG	0.292643
YML068W_56	YML068W	chrXIII	137529	137548	+	56	-20	20	CTGATGA	0.168139
YML104C_26	YML104C	chrXIII	62323	62332	-	26	-10	10	GATATGA	0.306363
YML106W_260	YML106W	chrXIII	56727	56750	+	260	-45	24	TGTATGA	0.101602
YML128C_22	YML128C	chrXIII	16761	16778	-	22	-102	18	CTCATGG	0.186982
YML128C_41	YML128C	chrXIII	16677	16759	-	41	-83	83	AGCATGA	0.263092
YMR010W_37	YMR010W	chrXIII	284871	284900	+	37	-228	30	TCCATGG	0.22509
YMR026C_43	YMR026C	chrXIII	325479	325508	-	43	-73	30	TGCATGA	0.114714
YMR034C_102	YMR034C	chrXIII	340772	340828	-	102	-106	57	TCTATGC	0.154544
YMR035W_12	YMR035W	chrXIII	341112	341140	+	12	-29	29	TTCATGA	0.171538
YMR040W_127	YMR040W	chrXIII	350201	350242	+	127	-179	42	AAAATGG	1
YMR054W_204	YMR054W	chrXIII	383292	383301	+	204	-10	10	TATATGA	0.216632
YMR097C_22	YMR097C	chrXIII	460528	460555	-	22	-28	28	TGAATGC	0.158527
YMR119W_194	YMR119W	chrXIII	505321	505331	+	194	-11	11	ACTATGC	0.354439
YMR145C_39	YMR145C	chrXIII	556625	556639	-	39	-164	15	TGCATGT	0.137411
YMR150C_45	YMR150C	chrXIII	562847	562879	-	45	-351	33	ATAATGA	0.581382
YMR164C_125	YMR164C	chrXIII	589551	589561	-	125	-11	11	TGCATGA	0.114714
YMR166C_52	YMR166C	chrXIII	594666	594674	-	52	-201	9	TGCATGC	0.107273
YMR171C_33	YMR171C	chrXIII	605672	605683	-	33	-163	12	TGCATGG	0.138382
YMR176W_67	YMR176W	chrXIII	611704	611733	+	67	-35	30	TGTATGT	0.121705
YMR182C_97	YMR182C	chrXIII	625168	625183	-	97	-16	16	AGCATGA	0.263092
YMR182W-A_59	YMR182W-A	chrXIII	623443	623451	+	59	-2367	9	AAAATGG	1
YMR182W-A_69	YMR182W-A	chrXIII	623453	623461	+	69	-2357	9	AAAATGA	0.828966
YMR192W_33	YMR192W	chrXIII	647061	647078	+	33	-56	18	TGCATGT	0.137411
YMR192W_47	YMR192W	chrXIII	647075	647104	+	47	-42	30	CTTATGA	0.137285
YMR195W_41	YMR195W	chrXIII	653982	654011	+	41	-51	30	CTAATGA	0.22906
YMR197C_19	YMR197C	chrXIII	659199	659208	-	19	-10	10	TGCATGG	0.138382
YMR207C_416	YMR207C	chrXIII	683570	683587	-	416	-23	18	ACAATGG	0.762881
YMR218C_30	YMR218C	chrXIII	706891	706902	-	30	-15	12	TACATGC	0.228723
YMR257C_299	YMR257C	chrXIII	782032	782120	-	299	-89	89	TTCATGT	0.205478
YMR258C_12	YMR258C	chrXIII	784300	784308	-	12	-27	9	CACATGA	0.22101
YMR267W_30	YMR267W	chrXIII	801727	801753	+	30	-44	27	TGTATGC	0.0950119
YMR320W_135	YMR320W	chrXIII	915595	915621	+	135	-1150	27	CCAATGT	0.29846
YMR320W_530	YMR320W	chrXIII	915990	916010	+	530	-755	21	CAGATGT	0.287177
YMR320W_56	YMR320W	chrXIII	915516	915569	+	56	-1229	54	CGTATGG	0.11075
YNL003C_1	YNL003C	chrXIV	625852	625860	-	1	-31	9	NA	NA
YNL032W_4	YNL032W	chrXIV	574369	574413	+	4	-136	45	ATAATGA	0.581382
YNL042W_51	YNL042W	chrXIV	548061	548098	+	51	-38	38	TACATGG	0.295052
YNL048W_3	YNL048W	chrXIV	538148	538159	+	3	-24	12	AACATGT	0.671938
YNL053W_17	YNL053W	chrXIV	529838	529852	+	17	-103	15	GTTATGC	0.200926
YNL066W_197	YNL066W	chrXIV	501158	501277	+	197	-356	120	CGTATGT	0.109973
YNL066W_503	YNL066W	chrXIV	501464	501513	+	503	-50	50	GCAATGA	0.389959
YNL068C_199	YNL068C	chrXIV	498290	498300	-	199	-11	11	TCAATGC	0.257856
YNL076W_115	YNL076W	chrXIV	483398	483406	+	115	-157	9	TGAATGA	0.169523
YNL083W_18	YNL083W	chrXIV	471364	471375	+	18	-12	12	CGAATGA	0.153182
YNL094W_121	YNL094W	chrXIV	447456	447467	+	121	-154	12	CATATGT	0.234479
YNL095C_39	YNL095C	chrXIV	446929	446967	-	39	-127	39	TTTATGG	0.183278
YNL097W-A_165	YNL097W-A	chrXIV	441305	441325	+	165	-125	21	TATATGT	0.259494
YNL109W_96	YNL109W	chrXIV	418912	418950	+	96	-51	39	CATATGT	0.234479
YNL114C_67	YNL114C	chrXIV	413121	413195	-	67	-140	75	TACATGC	0.228723
YNL125C_40	YNL125C	chrXIV	392286	392303	-	40	-136	18	TAAATGT	0.432964
YNL142W_125	YNL142W	chrXIV	357297	357305	+	125	-155	9	CACATGT	0.264739
YNL142W_54	YNL142W	chrXIV	357226	357357	+	54	-226	132	TCAATGA	0.275743
YNL156C_4	YNL156C	chrXIV	341969	342135	-	4	-167	167	TTGATGA	0.186077
YNL164C_146	YNL164C	chrXIV	326321	326339	-	146	-19	19	TTCATGC	0.160411
YNL186W_26	YNL186W	chrXIV	289370	289384	+	26	-127	15	AGCATGC	0.246026
YNL191W_29	YNL191W	chrXIV	280398	280418	+	29	-33	21	TGAATGT	0.203065
YNL211C_28	YNL211C	chrXIV	250318	250338	-	28	-23	21	AATATGT	0.595136
YNL238W_112	YNL238W	chrXIV	202257	202298	+	112	-170	42	CATATGC	0.183051
YNL239W_16	YNL239W	chrXIV	200481	200567	+	16	-87	87	TACATGC	0.228723
YNL276C_16	YNL276C	chrXIV	118827	118858	-	16	-32	32	TACATGT	0.292981
YNL294C_157	YNL294C	chrXIV	80261	80282	-	157	-22	22	TCGATGA	0.202406
YNR012W_32	YNR012W	chrXIV	647371	647388	+	32	-60	18	TATATGC	0.20258
YNR044W_12	YNR044W	chrXIV	703593	703610	+	12	-105	18	ATAATGA	0.581382
YNR055C_242	YNR055C	chrXIV	730381	730401	-	242	-215	21	TTCATGC	0.160411
YNR058W_43	YNR058W	chrXIV	734067	734093	+	43	-223	27	TTCATGA	0.171538
YNR059W_30	YNR059W	chrXIV	736725	736763	+	30	-77	39	AAGATGA	0.608495
YNR069C_279	YNR069C	chrXIV	762758	762790	-	279	-198	33	AATATGA	0.496834
YNR069C_4	YNR069C	chrXIV	763051	763065	-	4	-473	15	AGAATGA	0.388793
YOL001W_102	YOL001W	chrXV	324961	325053	+	102	-287	93	CTAATGC	0.214202
YOL001W_41	YOL001W	chrXV	324900	324956	+	41	-348	57	TTGATGA	0.186077
YOL011W_53	YOL011W	chrXV	304645	304716	+	53	-703	72	ATAATGA	0.581382
YOL011W_616	YOL011W	chrXV	305208	305243	+	616	-140	36	ACTATGT	0.454018
YOL014W_133	YOL014W	chrXV	299637	299691	+	133	-55	55	AGAATGT	0.465719
YOL018C_22	YOL018C	chrXV	292075	292117	-	22	-43	43	TTGATGT	0.222893
YOL033W_13	YOL033W	chrXV	263429	263443	+	13	-45	15	TACATGA	0.244588
YOL036W_139	YOL036W	chrXV	256490	256528	+	139	-254	39	TATATGC	0.20258
YOL038C-A_38	YOL038C-A	chrXV	255022	255047	-	38	-26	26	TTGATGG	0.224469
YOL043C_51	YOL043C	chrXV	249535	249566	-	51	-32	32	AAAATGT	0.992982
YOL062C_10	YOL062C	chrXV	211996	212005	-	10	-10	10	GTTATGG	0.259194
YOL063C_6	YOL063C	chrXV	210291	210332	-	6	-67	42	GTAATGA	0.358498
YOL096C_17	YOL096C	chrXV	139046	139057	-	17	-12	12	CTTATGG	0.16561
YOL103W_155	YOL103W	chrXV	123991	123999	+	155	-9	9	TTCATGG	0.20693
YOL105C_221	YOL105C	chrXV	115838	115858	-	221	-50	21	TATATGA	0.216632
YOL105C_230	YOL105C	chrXV	115838	115849	-	230	-41	12	TTCATGT	0.205478
YOL112W_44	YOL112W	chrXV	106577	106588	+	44	-132	12	CGGATGA	0.112442
YOL125W_15	YOL125W	chrXV	83787	83832	+	15	-46	46	GCTATGA	0.233719
YOL130W_150	YOL130W	chrXV	74297	74314	+	150	-102	18	TACATGG	0.295052
YOL158C_25	YOL158C	chrXV	21401	21412	-	25	-101	12	TCTATGT	0.197963
YOL158C_42	YOL158C	chrXV	21348	21395	-	42	-84	48	GAGATGA	0.375217
YOR033C_56	YOR033C	chrXV	394600	394611	-	56	-87	12	TATATGC	0.20258
YOR034C_13	YOR034C	chrXV	397173	397292	-	13	-206	120	TGTATGG	0.122565
YOR041C_20	YOR041C	chrXV	409942	409989	-	20	-1200	48	AAAATGT	0.992982
YOR044W_118	YOR044W	chrXV	412873	412923	+	118	-133	51	TTGATGT	0.222893
YOR049C_101	YOR049C	chrXV	423733	423816	-	101	-84	84	AAAATGT	0.992982
YOR053W_47	YOR053W	chrXV	427681	427710	+	47	-135	30	ACTATGA	0.379025
YOR057W_11	YOR057W	chrXV	432129	432146	+	11	-56	18	GTAATGG	0.432465
YOR061W_22	YOR061W	chrXV	441431	441448	+	22	-102	18	TGTATGA	0.101602
YOR073W_35	YOR073W	chrXV	464734	464751	+	35	-36	18	TATATGT	0.259494
YOR103C_24	YOR103C	chrXV	516842	516850	-	24	-9	9	TACATGA	0.244588
YOR118W_19	YOR118W	chrXV	546671	546679	+	19	-185	9	TAGATGA	0.265319
YOR120W_12	YOR120W	chrXV	550498	550506	+	12	-615	9	TGAATGA	0.169523
YOR120W_20	YOR120W	chrXV	550506	550577	+	20	-607	72	CTGATGA	0.168139
YOR120W_540	YOR120W	chrXV	551026	551034	+	540	-87	9	CTAATGA	0.22906
YOR120W_62	YOR120W	chrXV	550548	550577	+	62	-565	30	AGTATGA	0.23302
YOR136W_11	YOR136W	chrXV	580152	580202	+	11	-97	51	TGCATGA	0.114714
YOR152C_138	YOR152C	chrXV	618645	618740	-	138	-452	96	TATATGT	0.259494
YOR152C_267	YOR152C	chrXV	618489	618611	-	267	-323	123	TTTATGC	0.142076
YOR154W_3	YOR154W	chrXV	624681	624701	+	3	-47	21	GCAATGG	0.470417
YOR172W_19	YOR172W	chrXV	654184	654208	+	19	-25	25	TGAATGG	0.2045
YOR180C_13	YOR180C	chrXV	675629	675655	-	13	-488	27	ACCATGG	0.516232
YOR188W_59	YOR188W	chrXV	685729	685752	+	59	-37	24	TACATGG	0.295052
YOR193W_21	YOR193W	chrXV	710410	710444	+	21	-35	35	ACTATGA	0.379025
YOR231W_78	YOR231W	chrXV	772529	772558	+	78	-71	30	TTTATGG	0.183278
YOR246C_1	YOR246C	chrXV	796794	796855	-	1	-62	62	NA	NA
YOR266W_93	YOR266W	chrXV	821011	821021	+	93	-11	11	TTAATGC	0.237053
YOR305W_53	YOR305W	chrXV	889011	889020	+	53	-10	10	AACATGA	0.56095
YOR307C_62	YOR307C	chrXV	894164	894202	-	62	-110	39	TATATGC	0.20258
YOR307C_72	YOR307C	chrXV	894139	894192	-	72	-100	54	TATATGC	0.20258
YOR313C_162	YOR313C	chrXV	903158	903208	-	162	-334	51	GTAATGA	0.358498
YOR315W_19	YOR315W	chrXV	904701	904712	+	19	-58	12	AATATGT	0.595136
YOR342C_22	YOR342C	chrXV	967681	967716	-	22	-91	36	TCTATGG	0.199362
YOR363C_16	YOR363C	chrXV	1023213	1023261	-	16	-49	49	CGGATGA	0.112442
YOR376W-A_37	YOR376W-A	chrXV	1044742	1044765	+	37	-453	24	CCTATGA	0.149333
YOR376W-A_40	YOR376W-A	chrXV	1044745	1044765	+	40	-450	21	ATGATGA	0.426758
YOR380W_91	YOR380W	chrXV	1051172	1051249	+	91	-117	78	AATATGA	0.496834
YOR381W-A_108	YOR381W-A	chrXV	1058137	1058319	+	108	-285	183	TTCATGA	0.171538
YPL008W_83	YPL008W	chrXVI	539239	539280	+	83	-145	42	TTGATGA	0.186077
YPL029W_4	YPL029W	chrXVI	495463	495483	+	4	-42	21	ACTATGA	0.379025
YPL034W_33	YPL034W	chrXVI	486410	486472	+	33	-301	63	ATTATGA	0.348446
YPL034W_38	YPL034W	chrXVI	486415	486423	+	38	-296	9	GAGATGT	0.449456
YPL045W_15	YPL045W	chrXVI	467157	467192	+	15	-102	36	CTAATGA	0.22906
YPL057C_40	YPL057C	chrXVI	453184	453201	-	40	-144	18	CGCATGT	0.124165
YPL066W_130	YPL066W	chrXVI	426192	426203	+	130	-40	12	TCTATGG	0.199362
YPL067C_3	YPL067C	chrXVI	425863	425901	-	3	-54	39	AGCATGC	0.246026
YPL071C_30	YPL071C	chrXVI	420519	420534	-	30	-16	16	TAAATGA	0.361449
YPL072W_161	YPL072W	chrXVI	418479	418510	+	161	-32	32	TATATGC	0.20258
YPL072W_68	YPL072W	chrXVI	418386	418448	+	68	-125	63	TTAATGG	0.305799
YPL076W_94	YPL076W	chrXVI	410390	410441	+	94	-52	52	CGTATGA	0.0918082
YPL096C-A_20	YPL096C-A	chrXVI	366740	366757	-	20	-22	18	TACATGA	0.244588
YPL133C_12	YPL133C	chrXVI	301287	301346	-	12	-118	60	GGGATGG	0.212289
YPL133C_34	YPL133C	chrXVI	301292	301324	-	34	-96	33	CTTATGA	0.137285
YPL140C_106	YPL140C	chrXVI	289121	289147	-	106	-113	27	TGCATGA	0.114714
YPL140C_83	YPL140C	chrXVI	289153	289170	-	83	-136	18	TATATGT	0.259494
YPL146C_17	YPL146C	chrXVI	277530	277548	-	17	-19	19	TTAATGA	0.253497
YPL148C_93	YPL148C	chrXVI	272816	272859	-	93	-44	44	CTAATGA	0.22906
YPL149W_19	YPL149W	chrXVI	271251	271301	+	19	-58	51	CGAATGA	0.153182
YPL149W_66	YPL149W	chrXVI	271298	271306	+	66	-11	9	CCTATGA	0.149333
YPL151C_10	YPL151C	chrXVI	267536	267551	-	10	-16	16	TACATGG	0.295052
YPL164C_20	YPL164C	chrXVI	241498	241528	-	20	-31	31	AGAATGA	0.388793
YPL167C_40	YPL167C	chrXVI	237108	237117	-	40	-10	10	AAAATGT	0.992982
YPL176C_10	YPL176C	chrXVI	218364	218380	-	10	-17	17	CATATGA	0.195749
YPL177C_47	YPL177C	chrXVI	213963	213997	-	47	-35	35	TTTATGC	0.142076
YPL210C_7	YPL210C	chrXVI	156213	156230	-	7	-18	18	GTAATGA	0.358498
YPL214C_51	YPL214C	chrXVI	150221	150247	-	51	-56	27	ACCATGG	0.516232
YPL227C_43	YPL227C	chrXVI	121249	121257	-	43	-90	9	TGGATGC	0.116365
YPL255W_38	YPL255W	chrXVI	67710	67723	+	38	-14	14	CGAATGA	0.153182
YPL258C_142	YPL258C	chrXVI	55855	55896	-	142	-743	42	GAAATGA	0.511166
YPL258C_753	YPL258C	chrXVI	55244	55285	-	753	-132	42	GAAATGC	0.478009
YPR002W_40	YPR002W	chrXVI	558303	558314	+	40	-81	12	ATAATGT	0.696412
YPR013C_175	YPR013C	chrXVI	585956	585988	-	175	-403	33	AGAATGA	0.388793
YPR013C_459	YPR013C	chrXVI	585690	585704	-	459	-119	15	TCTATGG	0.199362
YPR018W_41	YPR018W	chrXVI	594426	594434	+	41	-49	9	TATATGT	0.259494
YPR047W_45	YPR047W	chrXVI	657513	657527	+	45	-15	15	CCAATGG	0.300569
YPR053C_191	YPR053C	chrXVI	667228	667236	-	191	-993	9	CCAATGA	0.249162
YPR072W_78	YPR072W	chrXVI	690083	690105	+	78	-23	23	TGCATGA	0.114714
YPR085C_43	YPR085C	chrXVI	709834	709872	-	43	-44	39	GTGATGT	0.315219
YPR085C_72	YPR085C	chrXVI	709829	709843	-	72	-15	15	ACAATGG	0.762881
YPR109W_184	YPR109W	chrXVI	744662	744685	+	184	-26	24	TCTATGT	0.197963
YPR117W_90	YPR117W	chrXVI	759814	759843	+	90	-210	30	CACATGC	0.206674
YPR123C_126	YPR123C	chrXVI	787507	787554	-	126	-979	48	TTCATGA	0.171538
YPR126C_77	YPR126C	chrXVI	789488	789529	-	77	-144	42	TCTATGT	0.197963
YPR127W_122	YPR127W	chrXVI	790015	790053	+	122	-67	39	TCTATGT	0.197963
YPR138C_124	YPR138C	chrXVI	812545	812559	-	124	-106	15	TCAATGC	0.257856
YPR173C_21	YPR173C	chrXVI	887838	887848	-	21	-11	11	TAGATGG	0.32006
YPR175W_10	YPR175W	chrXVI	888964	888972	+	10	-9	9	TCTATGT	0.197963

## Sheet: uORF_Expr
uORF_name	RPF_CDS_WT	RPF_CDS_R13P	RPF_uORF_WT	RPF_uORF_R13P	ΔRPF_CDS_R13P	ΔRPF_uORF_R13P	RRO_WT	RRO_R13P	ΔRRO_R13P
uaug-YDR133C_52	8.1	8.4	11.1017	11.509	0.28378	0.40727	2.95978	3.08327	0.123486
uaug-YDL204W_53	8.3	8.5	4.2676	5.107	0.26025	0.83897	-4.01643	-3.43771	0.57872
uaug-YGL256W_369	8	5.1	2.0644	1.614	-2.89439	-0.45034	-5.93487	-3.49081	2.44405
uaug-YER046W_318	5.5	5.4	1.3411	0.645	-0.08937	-0.696	-4.16138	-4.76801	-0.606638
uaug-YER050C_11	8	8.1	2.7093	2.368	0.05696	-0.34152	-5.3308	-5.72928	-0.398478
uaug-YOL011W_53	9.5	9.3	3.1473	3.146	-0.16657	-0.00104	-6.31865	-6.15312	0.165531
uaug-YNL032W_4	7.2	7.3	1.7998	-0.945	0.14788	-2.7446	-5.36002	-8.25249	-2.89247
uaug-YPL214C_51	7.4	7.6	0.5805	2.058	0.24314	1.47725	-6.79549	-5.56137	1.23412
uaug-YPL258C_142	5.5	5.4	0.9615	2.226	-0.18502	1.26411	-4.57662	-3.12748	1.44914
uaug-YOR380W_91	4.5	5.3	2.2625	2.878	0.79397	0.61538	-2.23358	-2.41216	-0.178582
uaug-YLL027W_19	8.7	9.2	1.9488	1.64	0.50576	-0.30837	-6.78522	-7.59936	-0.814132
uaug-YHR072W_4	8.4	8.4	1.535	2.231	0.04615	0.69557	-6.82236	-6.17295	0.64942
uaug-YER081W_130	8.6	7.7	0.5595	3.048	-0.98615	2.48896	-8.0887	-4.6136	3.47511
uaug-YML023C_18	5.7	5.6	0.9318	1.643	-0.12148	0.71086	-4.79106	-3.95872	0.832341
uaug-YKL005C_12	7.1	7.5	2.1413	0.057	0.3424	-2.08475	-4.99149	-7.41864	-2.42715
uaug-YGL032C_28	8.5	8	2.2679	3.298	-0.45497	1.02965	-6.2047	-4.72009	1.48461
uaug-YPL071C_30	4.9	5.4	2.1203	2.052	0.40636	-0.0679	-2.82958	-3.30385	-0.474264
uaug-YLR224W_106	5.8	5.9	1.2767	0.64	0.05929	-0.63721	-4.56346	-5.25995	-0.696496
uaug-YKL190W_6	8.8	9.3	3.2918	3.643	0.53985	0.35104	-5.47729	-5.6661	-0.188807
uaug-YHR209W_18	9.2	9.3	1.2776	0.64	0.139	-0.63793	-7.88806	-8.665	-0.776934
uaug-YPR085C_43	4.9	5.2	1.852	2.516	0.26439	0.66362	-3.03387	-2.63464	0.399231
uaug-YGL169W_22	7.3	7.5	1.2939	2.512	0.19935	1.21768	-6.02981	-5.01148	1.01833
uaug-YPL072W_68	5.1	5.6	1.9279	2.226	0.41702	0.29773	-3.21138	-3.33067	-0.119288
uaug-YNL042W_51	5.9	6	1.7751	1.643	0.18265	-0.13246	-4.09028	-4.40539	-0.31511
uaug-YLR152C_97	6.9	7	2.6893	2.217	0.1114	-0.47246	-4.24282	-4.82669	-0.583862
uaug-YGR024C_20	7.1	7	1.5848	1.858	-0.10676	0.27328	-5.47358	-5.09353	0.380046
uaug-YDL204W_26	8.3	8.5	4.301	5.15	0.26029	0.8487	-3.983	-3.39459	0.588405
uaug-YGL060W_37	7.9	8	3.3195	3.862	0.12358	0.54303	-4.54763	-4.12817	0.419454
uaug-YER081W_22	8.6	7.7	2.2973	2.857	-0.98616	0.55978	-6.35089	-4.80495	1.54594
uaug-YNL142W_54	5.7	5.3	3.3013	3.648	-0.40265	0.34715	-2.3788	-1.629	0.749802
uaug-YHR071W_229	6.7	6.7	0.9453	1.639	-0.02904	0.69377	-5.80114	-5.07832	0.722816
uaug-YGL063W_129	5	5	0.8647	1.075	0.08628	0.21039	-4.08644	-3.96232	0.124113
uaug-YAR008W_27	5.7	5.2	2.6724	2.221	-0.56426	-0.45176	-3.06764	-2.95514	0.112502
uaug-YLR152C_127	6.9	7	1.7232	1.365	0.11197	-0.35807	-5.20828	-5.67832	-0.470041
uaug-YCR019W_84	6.4	6.3	3.3631	3.058	-0.05868	-0.30473	-2.99474	-3.2408	-0.246053
uaug-YOL033W_13	6.7	6.8	1.2628	0.637	0.1441	-0.62576	-5.39544	-6.1653	-0.76986
uaug-YKR003W_27	8.5	8.8	3.0067	2.375	0.24481	-0.63187	-5.54159	-6.41826	-0.876673
uaug-YGL224C_65	7.9	7.9	2.5663	-0.944	0.00661	-3.51078	-5.35029	-8.86767	-3.51738
uaug-YBR043C_85	7.1	8.3	2.9321	3.448	1.25387	0.51554	-4.12608	-4.86441	-0.738332
uaug-YGR168C_16	5.1	5.1	2.1928	0.05	0.01096	-2.14323	-2.87703	-5.03122	-2.15419
uaug-YMR195W_41	7.7	8.3	3.2655	0.639	0.58464	-2.62647	-4.45184	-7.66295	-3.21112
uaug-YHR129C_56	5.4	5.9	1.7749	2.394	0.44718	0.61891	-3.64717	-3.47544	0.171731
uaug-YNL239W_16	10.8	10.7	5.0525	4.729	-0.13936	-0.32322	-5.78006	-5.96392	-0.183864
uaug-YDR387C_67	5.6	6.4	2.9987	2.64	0.78659	-0.35912	-2.64411	-3.78982	-1.14571
uaug-YLR360W_33	6.2	6.6	0.5527	1.377	0.35117	0.82455	-5.69041	-5.21704	0.473378
uaug-YEL016C_63	5.9	6.1	2.2935	2.388	0.20104	0.09436	-3.56755	-3.67424	-0.106685
uaug-YDR046C_37	9.8	9.8	3.5917	3.144	-0.03617	-0.44756	-6.20275	-6.61414	-0.411391
uaug-YCR023C_21	6.6	7.2	1.5547	2.757	0.62678	1.20218	-5.05372	-4.47832	0.575405
uaug-YOL018C_22	7.4	7.6	2.848	2.498	0.23223	-0.35012	-4.55761	-5.13995	-0.582346
uaug-YEL016C_87	5.9	6.1	2.2935	2.234	0.20107	-0.05967	-3.5675	-3.82824	-0.260739
uaug-YFL009W_14	8.9	8.9	2.1452	0.643	-0.02466	-1.50168	-6.76395	-8.24098	-1.47703
uaug-YHR129C_62	5.4	5.9	1.5602	2.24	0.44711	0.67951	-3.86199	-3.62959	0.232404
uaug-YJL139C_29	6.2	6.3	1.5083	1.638	0.10769	0.12974	-4.73383	-4.71178	0.0220526
uaug-YGL125W_21	11.1	11.5	4.2475	3.697	0.35284	-0.55001	-6.88798	-7.79084	-0.902852
uaug-YPL133C_12	6.1	6.7	1.9613	2.37	0.61783	0.40881	-4.15008	-4.3591	-0.209022
uaug-YHR135C_41	9.7	9.8	2.5475	1.379	0.05048	-1.16842	-7.19241	-8.41131	-1.2189
uaug-YAL034C_85	6.1	6.3	1.7532	3.065	0.21823	1.31176	-4.36538	-3.27184	1.09353
uaug-YBR242W_34	7.8	8	1.9523	0.641	0.15361	-1.31167	-5.86982	-7.3351	-1.46528
uaug-YAR008W_67	5.7	5.2	1.4982	1.377	-0.56408	-0.1215	-4.24168	-3.7991	0.442581
uaug-YKL053C-A_11	8.2	8.3	2.3969	2.847	0.11419	0.45025	-5.7814	-5.44534	0.336055
uaug-YDR308C_28	7.2	7.5	1.3198	1.637	0.26894	0.31768	-5.90909	-5.86036	0.0487364
uaug-YOL036W_139	8.1	8.3	4.908	4.486	0.27255	-0.42243	-3.15788	-3.85286	-0.694976
uaug-YKL109W_22	9	9.7	3.412	3.304	0.67299	-0.10845	-5.63477	-6.41622	-0.781443
uaug-YOR307C_72	7.6	7.7	2.1071	1.378	0.06319	-0.72937	-5.48706	-6.27962	-0.79256
uaug-YOR342C_22	7.2	7.3	2.2772	2.863	0.12438	0.58566	-4.8994	-4.43812	0.461281
uaug-YDR073W_48	6.3	7.2	2.6142	3.962	0.89448	1.34742	-3.69118	-3.23824	0.452944
uaug-YKL064W_48	8.2	8.7	1.7805	1.862	0.50424	0.08141	-6.37254	-6.79537	-0.422824
uaug-YNL156C_4	8	8	4.0229	2.965	0.01062	-1.05756	-3.97597	-5.04414	-1.06818
uaug-YBR086C_229	10.6	10.4	2.1311	1.378	-0.17262	-0.75312	-8.47473	-9.05523	-0.580498
uaug-YLR333C_81	12.2	12.4	2.1363	2.057	0.18215	-0.07965	-10.0841	-10.3459	-0.261807
uaug-YEL036C_125	9.6	9.4	2.2939	1.378	-0.12925	-0.91591	-7.26387	-8.05053	-0.78666
uaug-YGL071W_376	7.2	7.8	1.939	1.64	0.58867	-0.29926	-5.26614	-6.15406	-0.887927
uaug-YLR241W_22	9	8.7	2.138	0.056	-0.33294	-2.08149	-6.87131	-8.61986	-1.74855
uaug-YLR273C_160	5.3	5.5	2.8711	1.377	0.22568	-1.49443	-2.38567	-4.10578	-1.72011
uaug-YBR187W_15	9.1	9.3	2.8039	3.226	0.2508	0.42186	-6.28868	-6.11762	0.171063
uaug-YDR073W_182	6.3	7.2	2.2601	2.374	0.89422	0.11393	-4.04561	-4.82589	-0.780288
uaug-YDR248C_50	7	7.7	1.7728	1.644	0.69628	-0.1286	-5.18447	-6.00935	-0.824878
uaug-YBR028C_25	6.9	7	2.1425	2.382	0.06742	0.23942	-4.80386	-4.63187	0.171993
uaug-YDR206W_104	8	8.5	2.458	2.513	0.52984	0.05476	-5.56136	-6.03644	-0.47508
uaug-YMR192W_33	8.8	9	2.1235	1.375	0.1659	-0.74818	-6.66931	-7.58339	-0.914079
uaug-YPL133C_34	6.1	6.7	1.5565	1.374	0.61783	-0.18265	-4.55485	-5.35533	-0.800485
uaug-YDL002C_43	7.6	7.9	1.9951	2.228	0.37401	0.23288	-5.57665	-5.71778	-0.141132
uaug-YJR134C_16	7.8	7.8	2.1505	2.224	-0.01057	0.07372	-5.61011	-5.52582	0.0842899
uaug-YOR034C_13	7	7.1	1.7586	0.638	0.0167	-1.12086	-5.29013	-6.42769	-1.13756
uaug-YML007W_77	9.1	9.3	1.5774	2.373	0.23659	0.79568	-7.52154	-6.96246	0.559088
uaug-YOR136W_11	11.5	11.6	5.5753	5.948	0.08991	0.37317	-5.94631	-5.66305	0.283261
uaug-YMR026C_43	6.2	6.9	2.6903	2.229	0.70401	-0.46129	-3.46241	-4.6277	-1.1653
uaug-YOR363C_16	6.7	7	2.4092	2.637	0.36007	0.22828	-4.25104	-4.38283	-0.131785
uaug-YLR242C_63	5.6	6	1.2494	0.639	0.36047	-0.60988	-4.37259	-5.34294	-0.970347
uaug-YDR248C_46	7	7.7	1.9746	2.233	0.69625	0.25797	-4.98264	-5.42093	-0.438287
uaug-YNL066W_197	11	10.9	0.5416	2.057	-0.05869	1.51532	-10.4105	-8.83645	1.57401
uaug-YGL257C_49	6.8	7.3	2.2904	1.639	0.44481	-0.65093	-4.5366	-5.63234	-1.09574
uaug-YHR114W_20	8.6	8.8	3.5154	1.058	0.19699	-2.45737	-5.06467	-7.71903	-2.65436
uaug-YMR267W_30	7.6	7.7	1.5759	0.639	0.13619	-0.93738	-5.98737	-7.06093	-1.07357
uaug-YPL076W_94	5.7	5.7	2.9442	1.367	-0.02278	-1.57698	-2.76809	-4.32228	-1.55419
uaug-YDL073W_136	6.6	6.6	2.2916	1.863	0.04409	-0.4285	-4.29651	-4.7691	-0.47259

## Sheet: PARS
YORF	TE_WT	TE_R13P	TE_Change	5'UTR_Length	Start30_PARS	Plus15_PARS	Average_PARS	Context_score
YGL187C	1.23418	1.26334	0.02916	485	8.93	7.4	0.04	0.523871
YKL040C	0.40639	0.56081	0.15442	434	5.91	2.55	-0.03	0.545072
YOR222W	-0.14914	-0.12002	0.02913	443	22.86	27.11	0.15	0.469568
YDR472W	-0.06661	0.55903	0.62564	384	-4.12	-32.4	-0.01	0.60217
YIL123W	0.87471	0.67272	-0.20199	491	13.71	35.67	0.01	0.489978
YDL137W	1.08457	1.06587	-0.0187	373	-19.22	6.22	0	0.641153
YDL134C	0.31126	0.27523	-0.03603	486	-3.1	15.26	0.12	0.699145
YBR054W	0.55484	0.42036	-0.13447	316	-1.91	-10.35	0.01	0.885133
YLR333C	0.55365	0.70692	0.15327	475	-15.08	24.01	0.02	0.598148
YPR156C	0.28133	0.20805	-0.07329	316	20.68	23.65	0.21	0.504396
YBL092W	1.31026	1.18009	-0.13017	335	16.59	11.69	-0.04	0.369097
YLR367W	1.13343	1.17408	0.04065	565	-16.75	30.95	0.01	NA
YDL224C	-0.30919	-0.20178	0.10741	366	4.98	-1.89	0.11	0.700766
YKR100C	-0.30087	-0.25094	0.04993	277	-1.21	-4.07	-0.01	0.625253
YML056C	-0.1093	-0.22061	-0.11131	310	-49.96	-19.86	0.27	0.464253
YHR143W	0.56916	0.61451	0.04535	270	8.12	0.86	0.92	0.510036
YER102W	0.63816	0.6482	0.01005	369	-27.61	29.92	0	0.7356
YNL094W	-2.5428	-2.25021	0.29259	269	-8.27	-7.02	-0.02	0.653999
YGL189C	0.98159	0.94503	-0.03656	398	1.77	16.31	0.04	0.650319
YLR388W	1.49638	1.72812	0.23173	495	9.84	-13.51	0.01	0.760218
YDL061C	1.73136	1.85855	0.12719	446	3.34	-17.96	0.18	0.864195
YKL163W	1.39231	1.44291	0.0506	252	-2.71	0.55	0.11	0.569924
YER125W	-0.26376	-0.17249	0.09127	509	14.88	26.14	0.03	NA
YER131W	1.05317	1.02942	-0.02375	363	-3.37	13.08	-0.03	0.361377
YDL145C	-0.50459	-0.62107	-0.11648	240	3.27	6.74	0.23	0.457227
YKL004W	-0.58412	-0.93371	-0.34959	354	16.66	18	0.41	0.214543
YDR033W	0.75283	0.65879	-0.09404	240	14.17	-13.7	0.51	0.854404
YLR403W	-0.83484	-0.77654	0.0583	334	7.43	18.64	0.12	NA
YOL059W	0.6555	0.53382	-0.12167	231	6.81	4.03	0.07	NA
YDL160C	0.79403	0.88824	0.09421	278	11.54	24.47	0.4	0.506806
YKL151C	0.5094	0.30323	-0.20617	240	-2.16	-9.5	-0.11	0.373264
YKL176C	-3.18535	-3.22737	-0.04202	348	1.36	14.12	-0.06	0.27615
YKR038C	-0.16468	-0.09431	0.07038	305	-5.26	-0.1	0.02	0.532987
YGR148C	0.92533	0.95898	0.03364	421	-52.68	-7.6	-0.01	0.434081
YDL006W	-0.36567	0.00202	0.36769	334	4.05	-0.11	-0.04	0.527174
YGL031C	0.85325	0.88407	0.03081	491	-37.72	-9.6	-0.07	0.44914
YHR206W	-0.43288	-0.3445	0.08838	299	3.86	14.03	0.07	0.383467
YGL006W	-0.63039	-0.6904	-0.06001	276	3.75	4.49	0.06	NA
YNR055C	-1.77307	-1.72781	0.04526	242	3.17	6.16	-0.01	0.368421
YBL072C	0.60736	0.58722	-0.02015	316	-23.88	1.69	-0.06	0.708191
YIL048W	-0.77873	-0.96431	-0.18558	331	-2.49	7.14	-0.02	0.489141
YGR240C	0.27114	0.25116	-0.01998	225	4.86	40.21	0.12	0.538615
YCR084C	-0.01861	-0.14041	-0.12181	203	19	8	0.39	0.673111
YLR286C	0.63814	0.68773	0.04959	233	19.93	40.69	0.25	0.491207
YOL123W	0.88223	0.85306	-0.02918	361	11.85	21.46	0.08	0.408675
YNL261W	-0.77313	-0.463	0.31013	196	5.05	8.36	0.33	0.635466
YAL040C	-1.33542	-1.24827	0.08715	320	7.68	31.07	0.26	0.425232
YEL009C	-1.90299	-2.20779	-0.30479	572	31.85	21.02	0.42	0.657415
YDR251W	-0.84292	-0.70938	0.13354	278	15.15	11.67	0.2	0.534065
YNL189W	0.58096	0.6305	0.04954	195	20.51	53.67	0.02	0.649608
YDR541C	-1.01267	-0.58196	0.43072	239	-3.62	12.09	0.09	0.601077
YOL136C	-0.8531	-0.99449	-0.1414	207	2.8	4.61	0.23	0.554784
YOR142W	0.79749	0.87772	0.08023	205	12.96	18.18	0.49	0.422238
YNR016C	-0.47152	-0.43192	0.0396	546	18.8	24.59	0.26	NA
YLR219W	-0.24684	-0.16573	0.08111	197	2.14	7.02	0.07	0.495901
YMR199W	-0.57292	-0.5482	0.02472	195	5.54	5.13	0.12	0.312301
YOR151C	-1.07794	-1.05773	0.02021	258	4.28	12.7	-0.05	NA
YLR332W	0.104	-0.41884	-0.52284	424	6.17	3.87	0.29	0.279852
YJL050W	0.08387	-0.2026	-0.28647	184	-14.71	6.21	0.11	0.396545
YDL020C	-0.21544	-0.0894	0.12604	246	3.64	0.56	0.03	0.666773
YPL204W	-0.06561	0.11176	0.17738	210	-10.65	-13.82	-0.05	0.461914
YKR056W	0.27653	0.41821	0.14168	246	0	0	-0.06	NA
YGR218W	-0.06348	-0.00469	0.05879	291	5.94	17.48	0	0.422376
YMR261C	-0.10852	-0.23533	-0.12681	172	0.29	5.02	0.06	0.518131
YNL294C	-2.33851	-1.83029	0.50822	166	18.46	1.04	0.26	0.488146
YKL024C	0.39387	0.18239	-0.21148	227	24.98	24.74	-0.17	NA
YOL011W	-0.41932	-0.5566	-0.13728	166	-0.88	-26.59	0.27	0.43683
YBR031W	0.95895	0.83897	-0.11998	170	-1	48.48	0.22	0.575157
YFL005W	0.88446	1.09018	0.20572	163	-18.09	22.09	0.1	0.682633
YMR148W	0.13721	0.02332	-0.1139	242	1.58	3.48	0.2	0.502633
YDL188C	-0.06785	0.15674	0.2246	162	6.47	-13.05	0.15	0.815573
YPL232W	0.65924	0.70703	0.0478	180	0.67	10.52	0.28	0.407989
YOR152C	0.36685	0.52455	0.1577	218	-0.05	0.28	0.14	0.47292
YPR165W	0.70176	0.81036	0.10861	217	10.92	41.29	0.02	0.606729
YNL197C	-0.08263	-0.22113	-0.1385	351	15.57	22.43	0.19	0.284338
YER004W	0.52122	0.46924	-0.05199	156	6.97	7.67	0.13	0.557072
YHR162W	0.56926	0.76775	0.19849	170	-48.49	-28.27	0.36	0.826055
YGR178C	0.08281	0.07079	-0.01202	216	3.75	22.1	0.14	0.41783
YGL062W	-0.6329	-0.81609	-0.18319	236	6.17	8.49	0.1	0.455443
YKR042W	1.28723	1.22196	-0.06527	197	36.42	21.99	1.12	0.332701
YJL016W	-1.23525	-0.96419	0.27106	390	4.63	7.85	0.09	0.540428
YPL024W	-0.93387	-0.53571	0.39816	147	6.65	-9.34	0.41	0.436632
YDR293C	-1.11155	-1.11095	0.0006	200	2.4	8.05	0.07	0.608415
YDL190C	-0.36389	-0.23219	0.1317	187	7.34	-4.52	0.03	0.360262
YJL129C	-2.1954	-1.88512	0.31028	144	-0.04	6.11	-0.1	0.588325
YDL217C	0.82848	0.52507	-0.30341	157	0.17	12.84	-0.06	0.414946
YGR267C	0.27253	0.46894	0.19641	214	21.64	-10.03	0.37	0.63052
YOR322C	-1.01593	-1.28879	-0.27286	239	-1.48	11.84	0.06	NA
YBR218C	-0.58958	-0.74324	-0.15367	142	2.74	-17.18	0.1	0.455124
YDR011W	-1.03363	-1.29013	-0.2565	318	-4.45	7.77	0.23	0.304841
YOL004W	-0.48969	-0.53903	-0.04935	204	4.72	3.9	0.04	NA
YDR348C	0.5348	0.61634	0.08154	225	-19.26	3.15	0.05	0.307233
YLR378C	0.39303	0.30094	-0.0921	207	-4.56	22.84	0.6	0.543658
YDR144C	-0.51915	-0.89466	-0.37551	133	-8.47	17.05	-0.12	0.243143
YGR157W	-0.89972	-1.03195	-0.13223	216	7.97	12.79	0.41	0.306712
YNL063W	-1.6619	-1.01635	0.64554	151	2.43	1.98	-0.15	NA
YKL148C	0.33039	0.10231	-0.22809	174	2.02	7.51	0.01	0.551116
YJL101C	-1.20534	-1.02841	0.17693	154	-13.28	7.41	-0.03	0.565332
YJL127C-B	-1.47234	-0.84805	0.6243	133	1.76	-3.4	-0.02	0.431039
YDR414C	-0.50938	-0.52212	-0.01274	162	4.64	-12.82	0.06	0.450452
YIL115C	-0.20272	-0.18789	0.01483	163	-8.51	2.78	0.03	NA
YLR130C	-0.69237	-0.83323	-0.14085	145	4.16	7.17	0.27	0.44391
YOR014W	-0.45403	-0.58473	-0.13071	236	4.66	1.07	0.26	0.418976
YCR008W	-1.52752	-1.90483	-0.37731	140	12.14	20.69	0.19	0.489812
YDL084W	0.48624	0.53369	0.04744	157	10.06	19.29	0.42	0.602871
YPL050C	0.23592	0.08378	-0.15213	124	12.66	-13.33	0.28	0.668603
YDR326C	-1.28108	-1.30242	-0.02135	186	9.82	0.24	0.14	NA
YMR241W	0.24694	0.3801	0.13315	137	15.39	21.74	0.5	0.414385
YJL128C	-0.49193	-0.45945	0.03248	194	2.02	9.86	0.11	0.603155
YLR194C	0.83179	0.68572	-0.14608	124	3.23	3.01	0.05	0.470746
YNL085W	-0.5386	-0.61083	-0.07222	251	14.89	11.88	0.02	0.494232
YNL154C	0.00749	-0.00732	-0.01481	319	19.82	36.66	0.04	0.908212
YMR305C	0.60585	0.67658	0.07073	127	-15.69	9.33	-0.35	0.445089
YMR308C	-0.67761	-0.62918	0.04843	127	-17.11	-8.59	0.05	0.504236
YMR300C	0.09054	0.13996	0.04942	118	2.6	-15.81	-0.04	0.733301
YKL181W	-0.27929	-0.17473	0.10456	149	1.19	19.81	0.56	0.707378
YGR108W	-0.83639	-0.88393	-0.04754	117	3.61	1	0.22	0.580421
YDL014W	0.81048	1.02541	0.21493	129	-5.25	13.19	0.07	0.578771
YMR171C	-1.40709	-0.89036	0.51673	198	0.38	-2.09	0.01	0.386246
YNL219C	-0.12581	-0.16304	-0.03723	118	11.8	12.38	0.32	0.461614
YPL179W	-1.2581	-1.2589	-0.0008	147	14.45	24.81	0.29	0.26321
YFR014C	0.32965	0.19191	-0.13775	198	-2.6	-0.05	0	0.392957
YLL035W	-0.91442	-0.77278	0.14164	164	16.88	4.72	0.15	0.346198
YDR266C	-0.29128	-0.23352	0.05777	218	0.07	8.05	0.13	0.309536
YKL212W	0.24749	0.34869	0.1012	163	10.41	-2.94	0.21	0.438669
YPL092W	-0.39763	-0.43169	-0.03406	130	-9.06	-2.72	0.06	0.840249
YPL087W	0.22398	-0.02356	-0.24754	127	9.57	25.06	-0.11	0.319712
YLR134W	1.70757	1.69078	-0.01679	139	5.38	10.04	0	0.885133
YML072C	-0.51439	-0.66157	-0.14718	158	-4.17	5.23	0.04	0.762364
YBR137W	1.14793	0.79617	-0.35175	219	-1.94	-28.18	0.04	NA
YKL182W	-0.29088	-0.19755	0.09333	322	20.41	24.18	0.13	NA
YGL035C	0.10515	0.13049	0.02534	117	3.8	7.26	0	0.369004
YPL254W	-0.48976	-0.23644	0.25332	233	-0.15	1.15	0.12	0.497193
YML128C	0.77262	0.83087	0.05825	111	-20.87	1.04	-0.16	0.358183
YHR106W	-0.59706	-0.73123	-0.13417	145	-10.84	-1.69	-0.1	NA
YER118C	-0.02556	-0.20056	-0.17499	197	11.32	17.89	0.29	0.589258
YKL184W	-0.03291	-0.07934	-0.04642	212	-0.58	12.14	0.06	0.525089
YBR283C	0.19586	0.08963	-0.10623	149	29.51	22.15	0.39	0.451888
YHL003C	0.00089	0.05007	0.04918	124	20.48	1.78	0.15	0.537383
YER165W	0.78189	0.72304	-0.05885	134	33.83	43.18	0.1	0.818651
YHR142W	-0.24819	-0.21835	0.02984	185	7.4	18.16	0.16	0.534808
YHR216W	0.27648	0.07026	-0.20622	197	2.09	4.23	0.08	0.55693
YOL013C	-0.75985	-0.79435	-0.0345	151	4.05	3.85	0.05	0.431402
YLR257W	0.68008	0.70931	0.02922	182	4.08	14.3	0.18	0.557322
YKL046C	-0.02691	0.09702	0.12393	236	11.85	5.59	0.18	0.6323
YOR270C	-0.4647	-0.70539	-0.24069	164	14.2	15.53	0.29	0.695748
YNL090W	-0.36809	0.06786	0.43595	150	21.02	10.75	0.27	0.45013
YDR345C	0.40912	0.4066	-0.00252	104	-1.96	25.51	-0.32	0.557355
YMR119W	-1.25385	-1.19739	0.05646	193	4.55	2.84	-0.05	0.346436
YHR061C	0.36606	0.31232	-0.05374	197	-0.93	-6.73	0.02	0.538866
YFR049W	0.8413	0.99003	0.14873	161	10.4	10.6	0.07	0.384646
YNR074C	-0.49199	-0.53524	-0.04325	138	9.06	2.93	0.13	0.412758
YDR352W	-0.0041	-0.2306	-0.2265	103	5.92	13.34	0.21	0.280969
YJL005W	-1.60803	-1.74015	-0.13213	157	-3.76	-0.39	-0.04	0.558717
YJR045C	0.71991	0.6772	-0.04271	141	30.99	-13.71	0.88	0.621466
YLR414C	0.85146	0.86041	0.00895	102	-8.63	10.11	0.19	0.33306
YOR342C	-0.59075	-0.80116	-0.21041	148	0.05	0.12	0.06	0.825842
YDL195W	0.00094	-0.00538	-0.00632	104	-14.66	18.29	-0.03	0.589968
YER107C	0.10591	0.02847	-0.07744	178	-16.88	6.49	0.06	0.541745
YMR200W	0.70825	0.67088	-0.03736	106	6.97	-3.52	0.23	0.359481
YJR103W	-0.05505	-0.04539	0.00966	104	-11.44	-7.98	-0.02	0.442837
YGL123W	0.63352	0.70906	0.07554	100	-6.97	24.97	0.4	0.646173
YLL022C	0.41884	0.57065	0.15181	97	0.47	2.67	-0.01	NA
YPL148C	-1.09357	-0.87761	0.21597	126	5.8	8.97	0.04	0.412477
YKL140W	-0.0673	0.00087	0.06817	244	-1.86	-0.48	0.11	0.478907
YIL118W	0.75676	0.54464	-0.21212	106	3.3	47.36	-0.13	0.706193
YCL017C	0.36748	0.25315	-0.11433	97	-0.01	-1.45	-0.31	0.333614
YML119W	0.4097	0.25777	-0.15193	115	2.55	3.97	0	0.389917
YNL291C	-1.49699	-1.48992	0.00707	218	-2.3	3.89	0.33	0.369482
YIL117C	0.7052	0.72855	0.02335	96	3.72	-1.65	-0.13	0.514231
YGR038W	0.6293	0.51614	-0.11316	140	-8.72	13.4	0.13	0.296336
YJR116W	0.07423	-0.07069	-0.14492	241	13.82	13.77	0.13	0.381481
YFR033C	0.55818	0.46678	-0.0914	110	3.12	-1.07	0.46	0.446914
YNL238W	-1.25588	-1.10694	0.14894	261	0.72	6.52	0.1	0.300289
YDR441C	-0.03063	-0.16499	-0.13436	217	18.85	13.58	0.03	0.548613
YHR137W	0.52646	0.55379	0.02733	230	14.23	21.2	0.06	0.465095
YLR407W	0.41478	0.58657	0.17179	246	-0.31	2.74	-0.12	0.49871
YPL063W	0.39192	0.22997	-0.16195	109	23.92	16.02	0.43	0.315156
YIL033C	0.87646	0.89839	0.02193	96	6.95	32.79	0.35	0.532594
YGR054W	0.29404	0.23206	-0.06198	148	12.52	3.23	0.21	0.507441
YDR280W	0.49212	0.7352	0.24308	151	1.71	29.33	0.01	0.441251
YLR224W	-1.72082	-1.94365	-0.22283	133	17.56	12.69	-0.07	0.48062
YGR193C	0.77832	0.68777	-0.09055	94	-25.46	10.08	-0.35	0.636653
YKL051W	-0.27747	-0.73692	-0.45945	183	-1.96	6.03	-0.11	NA
YLR034C	0.09962	0.21157	0.11195	147	3.99	3.26	0.23	0.596098
YGR086C	0.61676	0.71634	0.09958	110	14.92	28.99	0.7	0.275131
YIL035C	-0.09528	-0.36983	-0.27455	113	9.59	5.54	0.15	0.348756
YML038C	-0.87142	-0.78318	0.08825	98	7.29	4.2	0.3	0.35234
YLR121C	0.08005	0.1257	0.04564	184	-1.51	-1.48	0.05	0.527559
YPL256C	-0.18801	-0.03563	0.15238	184	-2.92	21.57	0.14	0.561883
YNR012W	-0.34239	-0.31104	0.03135	94	3.07	13.35	-0.06	0.435306
YBR159W	0.30237	0.25472	-0.04765	141	-5.96	-8.7	-0.04	0.6982
YDL141W	-0.36811	-0.4961	-0.12799	186	-0.27	-1.29	-0.04	0.523621
YBR086C	-0.6337	-0.58876	0.04495	248	22.8	17.22	0.5	0.399654
YPL145C	0.53959	0.61916	0.07957	238	13.28	1.72	0.39	0.508473
YDR492W	0.23777	0.44787	0.2101	157	2.14	-11.59	0.17	0.72878
YJR109C	-0.03849	-0.07837	-0.03988	90	-11.89	-0.86	0	0.535282
YLR023C	-1.03991	-1.07863	-0.03872	113	8.03	12.89	0	0.24611
YDR099W	1.15373	1.23342	0.07969	828	-20.99	15.59	0.02	0.776255
YFR021W	0.3184	-0.21994	-0.53834	89	3.81	1.07	0.14	0.560127
YBR183W	0.10217	-0.16153	-0.2637	217	-15.42	-1.84	-0.07	0.294576
YEL042W	0.19317	-0.12868	-0.32185	151	12.1	21.1	0.09	0.618488
YOR039W	-0.01256	-0.04476	-0.0322	96	3.71	30.66	0.22	0.300376
YGR239C	0.83077	0.66022	-0.17055	138	3.21	3.81	0.01	0.438959
YDR354W	0.22633	0.06107	-0.16526	98	1.59	3.54	-0.03	0.430056
YBR084C-A	0.60807	0.57728	-0.03079	132	7.88	4.34	-0.09	0.78105
YOR209C	0.10071	0.28794	0.18723	150	0.25	29.2	-0.04	0.605265
YNL155W	0.57483	0.52868	-0.04615	130	9.66	-3.56	0.01	0.509868
YLR208W	0.57902	0.32363	-0.25539	118	13.39	17.11	0.35	0.44743
YAL060W	-0.02038	-0.07287	-0.05249	87	11.16	30.99	-0.07	0.406647
YBR078W	0.7247	0.62127	-0.10343	164	22.17	31.98	0.67	0.405975
YOR176W	0.56423	0.66617	0.10194	114	-8.22	15.19	-0.07	0.521627
YJL193W	-0.63814	-0.50737	0.13077	103	-3.53	1.83	0	0.647332
YOL012C	1.01929	0.95296	-0.06632	97	-1.6	-15.31	0.24	0.637084
YDR404C	0.31673	0.57658	0.25985	195	-13.64	1.55	0.23	0.392221
YPR011C	-1.22924	-0.88449	0.34474	106	5.95	9.5	0.06	0.55713
YKR028W	-1.33352	-1.26903	0.06449	119	1.33	10.27	0.01	NA
YER055C	0.09518	-0.05379	-0.14897	90	-20.6	5.73	-0.18	0.699145
YIL083C	0.92704	0.75452	-0.17252	91	21.15	41.3	0.16	0.520254
YPR105C	-1.35196	-1.14107	0.2109	100	2.59	4.59	0.15	0.278245
YKL106W	-0.42883	-0.53767	-0.10884	123	4.58	20.35	-0.05	0.279941
YDL135C	1.05622	1.11731	0.06109	167	-8.18	0.66	-0.01	0.554926
YPL019C	-0.41504	-0.39994	0.0151	127	9.92	15.3	-0.01	0.442837
YOR261C	0.47184	0.48701	0.01517	106	15.09	38.02	-0.01	0.723599
YDR298C	0.90741	0.84953	-0.05788	134	-0.84	-16.3	0.06	0.622191
YKL085W	0.96722	1.09374	0.12652	117	0.37	-6.71	-0.05	0.465947
YNL046W	-0.78502	-0.46217	0.32285	94	5.46	7.75	-0.01	NA
YNL169C	-0.32041	-0.59126	-0.27085	92	23.29	8.42	0.62	0.430254
YML106W	0.39949	0.58124	0.18175	220	-9.33	36.72	0.03	0.771722
YDR347W	-0.60292	-0.33143	0.27149	91	0.89	2	-0.05	0.440393
YBR214W	0.73305	0.66172	-0.07133	85	16.7	11.84	0.32	0.680035
YDL120W	0.35377	0.31252	-0.04125	83	-12.81	8.38	0.07	0.513426
YML086C	0.47224	0.42355	-0.04869	383	29.71	17.59	0.14	0.397326
YMR319C	-1.04187	-0.98697	0.0549	182	-3.35	0.12	-0.03	0.490976
YOR219C	-1.0967	-1.07746	0.01924	90	-3.26	8.6	-0.05	NA
YPR125W	0.62198	0.92148	0.29951	87	-5.88	-3.62	-0.11	0.431926
YPR191W	0.63747	0.66038	0.0229	85	-9.43	12.24	-0.01	0.244308
YIL108W	0.0364	-0.2084	-0.2448	95	-15.98	21.78	-0.22	0.489617
YMR112C	1.32834	1.27497	-0.05337	336	-1.84	-2.51	-0.01	NA
YPL239W	1.02203	0.87281	-0.14922	126	-1.72	17.2	0.01	0.393863
YGL139W	-0.42557	-0.36461	0.06095	86	13.15	7.07	0.6	0.307718
YHR020W	0.54471	0.48752	-0.05718	109	6.16	14.63	0.41	0.626395
YIL090W	-0.65816	-0.83068	-0.17253	124	12.29	6.86	0.15	0.531878
YMR267W	0.15112	0.15355	0.00244	104	-17.15	1.41	-0.26	0.630774
YLR048W	1.04875	1.0477	-0.00105	201	1.73	11.59	0.09	0.507701
YHR030C	-0.06598	-0.01026	0.05572	81	0.41	6.92	0.31	0.408026
YOR273C	-0.07608	-0.11886	-0.04278	97	-3.69	14.47	0.15	0.474347
YML102W	-0.31591	-0.60868	-0.29277	109	-20.06	-6.71	-0.18	0.375897
YGR210C	-0.03687	-0.12415	-0.08728	112	19.8	22.61	0.09	0.349092
YMR296C	0.01902	-0.08098	-0.1	94	-0.04	18.8	0.27	0.582595
YLR372W	0.5535	0.54457	-0.00892	129	39.33	38.62	1.13	0.362168
YNL220W	0.33081	0.30882	-0.02199	87	-9.54	1.63	-0.01	0.551278
YDL171C	-1.09832	-1.53446	-0.43614	111	11.7	-11.11	0.15	0.405596
YGL039W	0.14998	-0.01209	-0.16206	100	-6.16	7.49	-0.16	0.51508
YGR257C	-2.05525	-1.30483	0.75042	96	-2.53	4.82	0.37	0.418612
YOR153W	-0.64895	-0.79341	-0.14446	156	15.4	15.43	0.73	0.719365
YNL190W	0.14974	-0.0207	-0.17044	271	23.64	39.07	0.23	0.379529
YDL181W	1.8511	1.59818	-0.25292	88	15.59	1.2	0.15	0.393753
YKL138C	0.45924	0.41063	-0.04861	100	5.16	26.3	-0.09	0.430126
YAL053W	-0.23337	-0.21442	0.01894	110	8.81	26.88	0.2	0.374417
YNR032W	-0.16328	-0.11406	0.04922	79	3.29	-3.52	0.15	0.44871
YPL049C	0.18112	0.08394	-0.09718	105	-2.96	16.02	-0.24	0.371654
YGR229C	-0.14667	0.0329	0.17957	261	5.72	3.85	0.21	0.672267
YJL079C	0.95547	0.74881	-0.20666	185	7.53	4.8	0.47	0.441882
YJL166W	1.01743	1.2083	0.19086	96	5.02	53.91	0.15	0.503661
YLR028C	0.12595	-0.04123	-0.16719	192	20.28	42.13	0.16	0.581366
YCR067C	-0.61414	-0.65317	-0.03903	120	-0.13	12.27	0.03	0.622471
YLR347C	0.1692	0.14557	-0.02363	149	-13.47	22.95	-0.29	0.441962
YHR045W	-0.38563	-0.21396	0.17168	143	2.33	-6.26	0.05	0.447757
YGL256W	-0.64042	-2.75171	-2.1113	268	6.98	18.38	0.19	0.826055
YBR125C	-0.52724	-0.30642	0.22082	177	0.44	16.75	0.06	0.819481
YER089C	-0.29186	-0.28909	0.00277	305	2.58	13.18	0.1	0.572233
YLR009W	0.9752	1.09924	0.12404	180	-5.55	-5.62	0.25	0.614133
YBL016W	-0.0049	0.19139	0.19629	227	-4.82	-1.83	-0.01	NA
YPL247C	-0.26752	-0.47427	-0.20674	77	-11.54	-2.51	-0.03	NA
YJL133W	-0.87654	-0.40356	0.47297	172	2.68	11.11	0.06	0.378843
YDR493W	1.29673	0.9646	-0.33213	86	-20	-21.49	-0.08	0.346972
YDL203C	-0.56146	-0.48963	0.07182	88	-4.67	-7.93	-0.08	0.420887
YOR061W	0.67341	0.74883	0.07543	135	3.38	32.1	0.15	0.477245
YNL283C	-1.29647	-1.44607	-0.1496	78	1.36	11.29	0.27	0.28056
YMR189W	-0.68162	-0.74436	-0.06275	153	5.75	11.39	0.33	0.496076
YAR014C	-0.34194	-0.74819	-0.40625	152	-5.83	-2.98	-0.01	0.37457
YNL289W	0.73263	1.05469	0.32206	96	4.4	13.56	0.11	0.668772
YMR277W	-1.06417	-1.12318	-0.05901	88	2.4	15.16	0.22	0.319516
YNL241C	0.14006	0.04271	-0.09736	76	9	9.12	-0.3	0.464477
YDR073W	-0.70208	-0.42591	0.27617	155	16.16	25	-0.06	0.50327
YDR071C	0.92909	1.18903	0.25994	79	15.36	40.1	0.21	0.612404
YDR074W	0.0274	0.03807	0.01067	77	17.15	1.98	0.16	0.509936
YGR191W	-0.01485	-0.06519	-0.05034	140	7.11	-7.6	-0.02	0.869147
YGR230W	0.60162	0.92427	0.32265	75	1.5	8.94	-0.02	0.41726
YKL002W	0.58654	0.06769	-0.51884	79	6.39	0.95	0.03	0.628926
YJR060W	1.1653	1.26411	0.09881	124	13.96	9.07	0.03	0.454653
YLL013C	-0.4444	-0.41484	0.02956	273	-0.63	4.56	0.17	0.441317
YHR104W	0.79637	0.87942	0.08305	90	-2.37	6	-0.03	0.817464
YDR497C	-0.33679	-0.63408	-0.29729	77	12.1	33.14	-0.06	0.52498
YKL033W-A	0.01194	-0.12187	-0.13381	89	-11.25	8.07	-0.12	0.464495
YMR092C	0.32785	0.48483	0.15699	84	2.96	11.51	0.33	0.693574
YBL030C	0.8001	0.91055	0.11045	92	21.12	23.92	0.67	0.579373
YIL135C	0.88206	0.7304	-0.15165	89	14.05	18.07	0.31	0.682902
YNL300W	1.22783	1.02518	-0.20265	94	6.35	48.12	0.48	0.474806
YDR238C	0.02301	-0.07463	-0.09763	141	-2.42	18.9	-0.06	0.398839
YBL035C	-0.3066	0.13543	0.44202	188	3.99	6.01	0.02	0.587079
YER052C	0.39443	0.27905	-0.11539	81	12.51	6.16	0.23	0.348544
YMR125W	-0.23479	-0.20071	0.03408	78	1.07	7.46	0	0.601794
YDR384C	0.99294	0.19297	-0.79996	82	-9.32	-8.12	0.22	0.589383
YOR370C	-1.05308	-1.12405	-0.07097	302	10.48	21.16	0.09	0.38735
YML035C	0.20515	-0.03469	-0.23984	144	1.36	-6.2	-0.12	0.446966
YLR432W	0.40835	0.28555	-0.1228	116	10.15	13.83	0.33	0.55693
YPR159W	0.05236	-0.08635	-0.13871	285	8.56	24.68	0.29	0.426995
YBR158W	-0.89145	-0.75867	0.13278	266	4.47	5.99	0.4	0.337355
YPR103W	0.76252	0.88289	0.12036	96	3.22	49.99	-0.12	0.533741
YGR143W	-0.92882	-1.18382	-0.255	163	20.63	7	0.18	NA
YPL066W	-1.95612	-1.54492	0.4112	74	6.13	2.71	0.06	0.452298
YOR008C	0.11153	-0.02694	-0.13847	212	12.45	18.44	0.18	0.510539
YGL038C	0.07239	0.0797	0.00731	73	3.68	-2.84	0.19	0.462338
YBL099W	0.70797	0.71321	0.00524	299	15.17	25.94	0.36	0.544529
YOL130W	-0.93284	-0.58238	0.35046	156	10.56	24.86	0.22	0.498913
YHR008C	1.28502	1.26527	-0.01975	84	0.17	14.68	0.23	0.399179
YMR047C	0.09072	0.0939	0.00317	77	13.84	15.79	0.23	0.482608
YER062C	1.13098	1.36924	0.23826	199	-18.69	-10.03	-0.07	0.343838
YMR242C	1.38952	1.40375	0.01423	91	-15.14	0.76	-0.57	0.494148
YKL154W	0.07334	-0.13908	-0.21242	77	3.29	19.86	-0.25	0.492289
YGL019W	0.24671	0.23283	-0.01388	72	-6.21	15.6	-0.22	0.517967
YDR394W	0.3573	0.60154	0.24424	93	-11.35	11.62	0.01	0.458678
YOR232W	0.98431	1.30706	0.32274	100	-6.32	-9.9	0.37	0.430114
YKL035W	0.97515	1.04291	0.06775	73	-0.38	6.49	1.1	0.66302
YLR126C	0.05058	0.45247	0.40189	81	0.35	5.14	0	0.587963
YBL032W	0.42253	0.31839	-0.10414	76	-5.1	19.57	1.17	0.460158
YBL061C	-0.19228	-0.14764	0.04464	102	1.62	7.07	0.17	0.792818
YDR539W	0.10114	-0.07563	-0.17677	95	-13.41	-6.2	0	0.324836
YFR039C	-0.28845	-0.36369	-0.07525	116	4.21	-2.04	0.01	0.410059
YBR162C	0.30497	0.16791	-0.13706	149	7.78	8.11	0.55	0.705853
YHR183W	0.85892	0.83693	-0.02199	79	33.31	73.59	0.29	0.816093
YPL250C	1.0416	0.79374	-0.24786	70	5.17	35.47	0.08	0.567339
YPL207W	-0.38073	-0.63669	-0.25596	70	4.88	8.46	0.14	0.54003
YPL132W	-0.49312	-0.27405	0.21907	139	8.08	10.29	-0.08	0.319536
YPL235W	0.41405	0.54441	0.13036	95	21.07	-0.16	0.35	0.375641
YHR043C	0.61764	0.79476	0.17712	102	-20.95	9.13	-0.14	0.727409
YGL009C	0.25442	0.20152	-0.0529	70	-7.17	13.52	-0.01	0.587207
YGL092W	-0.74065	-1.01645	-0.27579	76	-0.54	-0.14	0.02	NA
YMR281W	0.3939	-0.17519	-0.56909	117	5.02	15.08	0.02	0.286701
YGL078C	0.66796	0.56973	-0.09823	78	-2.51	-0.08	0.06	0.634686
YNL221C	-1.73839	-1.7153	0.02309	69	-2.43	1.66	0.05	0.377709
YMR088C	-0.99694	-0.93248	0.06446	75	16.63	8.68	0.3	0.375786
YDR127W	-0.37296	-0.39696	-0.024	173	-4.37	16.37	-0.06	0.418574
YOR315W	-0.35287	-0.45187	-0.099	81	-0.15	9.45	0.04	0.685614
YLR196W	0.29036	0.13666	-0.1537	75	-2.13	9.22	-0.01	0.424801
YLR387C	0.73129	0.65327	-0.07802	69	2.84	22.33	0.19	0.426939
YLR380W	0.63365	0.23618	-0.39747	82	-12.61	-2.7	0.22	0.369859
YOL111C	1.70596	1.32946	-0.3765	137	2.32	14	0.13	0.41028
YHR121W	0.01968	-0.04133	-0.061	69	10.3	25.65	0.05	0.272152
YBR249C	1.07224	1.02914	-0.04309	138	18.58	51.21	-0.14	0.591909
YJL042W	-1.07682	-1.09032	-0.0135	79	15.29	7.87	0.35	0.259522
YOR347C	-0.02548	-0.07999	-0.05451	100	-31.97	-4.61	-0.16	0.354149
YDR007W	-2.94926	-2.98718	-0.03792	110	-4.37	7.61	0.13	0.329138
YDL022W	1.13129	1.20231	0.07102	89	-14.5	-19.44	-0.29	0.839894
YMR026C	-1.08433	-0.86055	0.22378	115	13.03	5.61	0.06	0.321191
YGR119C	0.25864	0.29593	0.03729	69	-3.39	-1.36	0.08	0.366064
YOR116C	-0.97812	-0.89615	0.08197	247	0.6	11.82	0.12	0.258466
YOR306C	-1.1868	-2.30068	-1.11388	195	10.18	16.55	0.11	0.50144
YNL329C	-1.89814	-1.89156	0.00658	88	0.93	7.06	-0.02	NA
YNL200C	0.62553	0.82477	0.19924	103	-18.75	-14.57	-0.02	0.894836
YOR327C	0.74047	1.11509	0.37462	70	11.98	23.4	0.05	0.544514
YDR062W	-0.26623	-0.1515	0.11473	74	20.23	34.98	0.64	0.347239
YHL017W	-0.43485	-0.57544	-0.1406	76	-0.45	10.12	-0.15	0.699145
YBR291C	0.20861	0.0177	-0.19091	170	-1.28	-10.38	0.03	0.385962
YGR046W	-0.59515	-0.56378	0.03136	147	-4.34	7.14	-0.06	0.359702
YDL132W	-0.40389	-0.51138	-0.10748	303	6.2	6.47	0.14	0.527141
YCL055W	0.88248	1.03794	0.15546	131	-1.88	2.8	-0.01	0.601291
YLR248W	-0.09595	0.01235	0.1083	133	-11.38	-5.16	0.12	0.341927
YDL046W	1.0633	0.94903	-0.11427	67	14.39	7.49	0.51	0.662586
YBR089C-A	0.95732	1.46297	0.50566	440	-14.04	-32.52	0.02	NA
YJR096W	0.52751	0.57856	0.05105	123	5.32	5.05	0.01	NA
YPL012W	-0.18633	-0.08285	0.10347	123	-1.6	1.74	-0.04	0.52354
YJL183W	-0.20048	-0.25782	-0.05734	77	-15.12	8.58	0.05	0.640625
YHR001W-A	1.71216	1.7709	0.05873	69	19.7	28.32	0.1	0.428643
YOL151W	0.29687	0.36563	0.06876	72	-26.59	0.82	-0.17	0.600618
YBL045C	0.77125	0.85936	0.08811	197	16.71	13.21	0.13	0.6323
YCR023C	-1.58863	-1.05056	0.53807	77	-15.56	4.21	0.58	0.472695
YDR346C	-0.03021	0.01786	0.04807	159	-13.85	-16.2	0.01	0.461165
YBL022C	-0.14645	-0.20204	-0.05559	114	-6.64	1.77	0.08	0.265901
YLL039C	1.17312	1.17048	-0.00264	100	2.81	22.28	0.32	0.264116
YBL003C	1.08342	1.24827	0.16485	66	-11.04	20.52	-0.36	0.54652
YMR307W	0.40011	0.28909	-0.11102	71	-55.61	-17.04	-0.67	0.569164
YOR271C	0.7543	0.56459	-0.1897	71	-13.97	-37.55	0.18	0.55619
YMR318C	0.56733	0.4711	-0.09623	112	12.93	16.5	0.29	0.6919
YBR211C	-0.02333	0.3496	0.37293	100	-2.36	-4.94	0.16	0.388294
YJL140W	0.11234	0.2211	0.10876	85	-2.76	1.87	0.28	0.643223
YNL216W	0.48067	0.53809	0.05742	80	6.65	-3.38	0.28	0.642308
YGL055W	0.43155	0.33822	-0.09333	95	2.99	-3.9	0.51	0.655896
YPR035W	0.87158	0.79987	-0.07171	119	11.8	32.81	0.15	0.973294
YNL231C	0.60795	0.77429	0.16634	265	5.45	10.84	0.01	0.614745
YBR235W	-1.29482	-1.54663	-0.2518	65	0	0.14	-0.1	0.395054
YLR448W	0.82732	1.01013	0.18281	65	-10.34	8.83	-0.36	0.658931
YCL012C	0.75263	0.10867	-0.64395	66	-5.58	0.34	0.01	0.241862
YHR001W	0.52702	0.42273	-0.10428	322	-22.85	0.75	-0.07	0.629027
YOR057W	0.31084	0.41254	0.10169	69	-1.34	2.28	-0.07	0.696291
YBL001C	0.74048	0.85864	0.11816	69	-28.7	15.89	-0.74	0.487006
YCR004C	1.00394	1.19933	0.19538	172	-11.34	20.25	0	0.505746
YGL054C	0.67086	0.83609	0.16523	70	-41.35	7.12	-0.07	0.679058
YDR341C	0.4956	0.56131	0.06571	65	-1.03	24.94	-0.73	0.617264
YGR175C	0.62043	0.66261	0.04218	65	-30.47	17.14	-0.41	0.344273
YLL012W	-0.15738	-0.31013	-0.15276	129	8.22	21.79	-0.01	0.512309
YML075C	-0.86273	-0.89519	-0.03246	82	20.52	16.89	0.15	0.408108
YDL019C	-0.91374	-0.96614	-0.05239	215	-2.42	-8.66	0.11	NA
YBR029C	0.67869	0.3291	-0.34958	686	-16.88	4.58	0	0.76917
YOL031C	0.26475	0.34421	0.07946	64	0.32	7.22	0.2	0.373034
YOR109W	-0.67418	-1.02288	-0.3487	93	9.29	-2.03	0.16	0.426032
YJL020C	0.55225	0.6024	0.05016	75	-22.24	3.62	-0.06	0.413354
YDR372C	0.24021	-0.07613	-0.31633	251	2.98	-0.48	0.01	0.6919
YNR030W	-0.14313	-0.02684	0.11629	71	12.63	12.49	0.48	0.43927
YLL010C	-0.16956	-0.19819	-0.02863	244	6.51	11.43	0.34	0.413956
YLR093C	0.5605	0.59124	0.03075	73	-5.12	-9.7	-0.28	0.37367
YPR010C-A	1.6178	1.76598	0.14818	116	6.58	20.18	0.11	0.526462
YAL012W	1.24884	1.2121	-0.03674	67	6.47	7.86	1.19	0.708348
YDR214W	0.82364	0.95864	0.135	106	3.34	-2.95	0.14	0.495223
YIL094C	-0.09989	-0.08932	0.01056	65	0.84	13.55	-0.06	0.730077
YDR086C	1.6832	1.71837	0.03517	108	23.23	41.55	0.25	0.818651
YER064C	0.23208	-0.03009	-0.26218	94	-6.33	-4.2	0.02	0.516386
YPR109W	-1.47636	-1.09221	0.38415	139	3.8	3.57	-0.11	0.696603
YOR319W	-0.52059	-0.40365	0.11694	64	-0.07	9.45	-0.06	0.321898
YOL128C	-1.13193	-0.88965	0.24229	69	-1.76	0.28	-0.01	NA
YMR002W	1.55035	1.76735	0.217	63	-14.77	33.38	-0.25	0.631484
YCR094W	-0.3647	-0.28718	0.07753	63	-0.51	6.22	0.05	0.324116
YDR045C	0.08162	0.78074	0.69912	124	-11.47	12.28	0.14	0.385048
YLR192C	0.86647	1.03387	0.16739	63	10.43	18.83	-0.03	0.963617
YJR044C	0.77004	0.60207	-0.16797	65	-17.19	15.33	-0.11	0.240356
YBR212W	0.43148	0.47093	0.03945	351	1.49	7.02	0.06	0.402351
YDL193W	0.45836	0.73713	0.27878	63	0.75	-0.77	-0.16	0.357381
YEL060C	0.52278	0.52089	-0.00189	257	-11.13	-0.67	-0.01	0.478192
YAL023C	0.0486	-0.04983	-0.09843	86	28.29	43.14	0.69	0.53545
YGL224C	0.208	0.06575	-0.14224	161	7.32	18.69	0.06	0.322869
YDR225W	1.0127	1.13809	0.12539	63	-10.08	20.52	0.16	0.639858
YHR007C	0.22492	0.19834	-0.02659	131	35.46	29.61	0.56	0.620611
YDL168W	0.89043	1.05428	0.16386	63	-8.94	15.86	-0.4	0.499692
YHR068W	0.4544	0.3983	-0.0561	75	4.11	17.89	0.1	0.676589
YAL005C	0.94815	1.02431	0.07616	65	-2.85	23.01	0.65	0.508667
YMR130W	-0.36277	0.00185	0.36463	79	-12.05	20.54	-0.42	0.321179
YML108W	0.37623	0.41361	0.03738	63	-10.38	5.95	0.15	0.575157
YDR517W	0.07173	0.17349	0.10176	146	21.49	14.21	0.37	0.507108
YEL016C	-1.6705	-1.70695	-0.03644	166	-5.81	2.74	-0.03	0.430995
YLR427W	-1.01337	-0.65411	0.35925	96	1.07	2.76	-0.06	0.281242
YMR126C	-1.74083	-2.0678	-0.32698	78	4.46	6.07	0.08	0.306712
YDR212W	0.18305	0.21753	0.03448	62	-6.75	4.95	0.11	0.470983
YDR148C	0.84959	0.83157	-0.01802	205	8.16	24.96	0.2	0.64753
YML070W	0.85906	0.79909	-0.05996	62	-13.01	-2.08	0.12	0.442452
YGR133W	0.26988	-0.48015	-0.75003	62	0	-1.5	0	NA
YGL191W	1.33041	1.38622	0.05581	63	0.13	21.99	-0.22	0.718047
YER019W	-0.36846	-0.3936	-0.02513	113	0.14	1.81	0.01	NA
YER056C	0.06379	-0.01363	-0.07742	89	-9.99	28.17	0.39	0.455363
YDR072C	-0.37629	-0.15277	0.22352	683	0.49	6.42	0.04	0.418381
YDR046C	-0.57458	-0.47658	0.09799	79	-0.9	-5.17	0.24	0.402576
YGL257C	-2.16302	-1.30888	0.85414	90	-5.32	-4.02	0.05	0.354412
YOL056W	0.50581	0.71272	0.20691	61	-5.23	-9.47	0.1	0.48803
YHR071W	-3.24341	-3.50031	-0.2569	61	-7.16	-2.47	0.92	0.649608
YML080W	0.53646	0.22519	-0.31127	126	17.24	13.86	0.14	0.306964
YOR101W	0.05116	-0.02914	-0.08031	87	-23.84	-4.69	0.05	0.345272
YNL132W	-0.24503	-0.02142	0.22361	93	-8.28	-3.78	0	0.520332
YOL010W	0.3789	0.40511	0.02621	68	12.66	23.2	0.07	0.580774
YAL007C	0.69928	0.75129	0.05201	69	-16.64	-11.08	0.53	0.464171
YKL063C	1.02315	0.74769	-0.27547	161	7.26	8.05	0.16	0.410006
YGL207W	-0.0271	0.03421	0.0613	95	7.62	10.15	0.19	0.365792
YGL135W	0.75523	0.87768	0.12245	66	13.17	16.42	0.9	0.743509
YMR229C	-0.35683	-0.42473	-0.0679	108	7.88	17.1	0.1	NA
YER119C	-0.10997	-0.66448	-0.55451	137	-6.19	-5.99	-0.01	0.287648
YMR243C	-0.33268	-0.4347	-0.10202	119	31.59	14.52	0.49	0.309189
YBL020W	-0.74855	-0.58556	0.163	159	-3.38	3.01	0.09	0.683209
YLR437C	1.02041	0.7235	-0.2969	95	8.25	7.63	0.13	0.330987
YPL154C	0.5299	0.36239	-0.16752	247	-6.13	15.93	0.16	0.496978
YBR084W	-0.48353	-0.63332	-0.14979	71	0.69	-4.03	0.07	0.370045
YKL008C	0.21999	0.06568	-0.15431	73	3.49	49.53	0.49	0.358166
YGL008C	0.12956	0.11195	-0.0176	238	-0.38	46.11	0.7	0.650655
YGR183C	0.62875	0.99689	0.36814	80	3.68	-11.52	0.25	0.620362
YPL203W	0.03612	0.01475	-0.02137	164	1.01	7.12	0.18	0.269028
YNL087W	-0.67573	-0.41424	0.26149	188	1.7	18.98	-0.29	NA
YLR056W	0.4651	0.02488	-0.44022	63	-0.83	-3.03	0.21	0.437198
YER082C	0.05337	0.05553	0.00216	75	4.2	4.28	0.36	0.599107
YKL104C	-0.14032	-0.12104	0.01928	187	-2.82	10.91	0.35	0.789666
YDR516C	0.67338	0.61436	-0.05902	99	-16.95	0.84	-0.38	0.578771
YBR165W	0.53729	0.29693	-0.24036	75	-12.56	-22.49	-0.32	0.65762
YPL135W	0.76693	0.94623	0.1793	100	5.28	21.35	-0.06	0.339172
YCR028C-A	1.43631	1.56363	0.12732	60	-3.6	44.38	-0.25	0.488747
YPL183W-A	1.01661	1.2572	0.24059	64	-26.15	-0.51	-0.34	0.545072
YJR025C	0.90565	1.05331	0.14766	68	-0.89	-1.63	0.19	0.837623
YCL001W	0.4879	0.5737	0.0858	59	-16.48	13	-0.08	0.559747
YKR089C	-1.02574	-1.51836	-0.49262	62	-3.55	0.55	0.14	0.247333
YLR090W	-0.42245	-0.8778	-0.45535	65	-1.86	-1.27	-0.09	0.2967
YER136W	0.46194	0.40007	-0.06187	81	14.81	23.43	0.37	0.664241
YJL094C	-0.795	-1.12923	-0.33424	65	1.71	12.94	-0.14	0.443839
YGR101W	0.42827	-0.08467	-0.51294	59	-10	-9.22	-0.1	0.456145
YMR195W	0.75842	1.17736	0.41894	79	-5.69	-1.65	0.04	0.708156
YNL101W	-1.20526	-1.26739	-0.06213	176	4.63	12.68	-0.15	0.417859
YML113W	0.7933	0.64358	-0.14972	73	1.27	6.28	-0.16	0.265253
YPL224C	-0.6272	-0.53552	0.09168	176	-11.69	-2.54	-0.12	NA
YFR053C	0.87165	0.7841	-0.08756	90	-1.39	5.12	0.09	0.620245
YER044C	0.34693	0.20992	-0.13701	72	4.82	-18.52	0.45	0.377828
YHL027W	0.32363	0.30993	-0.01371	132	4.53	-4.41	0.04	0.430091
YPL220W	0.77939	0.92978	0.15039	66	-3.21	12.65	-0.07	0.731623
YCL037C	0.88606	0.89497	0.00891	59	11.05	6.61	0.67	0.644718
YJL041W	0.30319	0.46823	0.16504	59	-0.77	2.32	0.73	0.490909
YGL022W	-0.20447	-0.35392	-0.14945	59	0.92	18.85	1.13	0.326537
YDR408C	0.16256	0.61123	0.44866	59	-16.82	-6.91	0.07	0.443598
YNL037C	0.9427	0.84907	-0.09364	115	2.81	9.72	0.3	0.643223
YPR182W	0.87429	1.19112	0.31682	59	-22.87	38.74	0.43	0.37457
YNL158W	0.33971	0.42162	0.08191	60	8.62	11.65	0.25	0.424527
YMR055C	-0.15138	-0.24444	-0.09306	107	1.29	-1.81	0.03	0.245186
YDR090C	-0.20308	-0.16949	0.03359	116	-26.4	-8.64	-0.14	0.28712
YER049W	-0.01533	0.00373	0.01906	99	-11.73	-6.63	-0.18	0.413109
YNR009W	0.29531	0.08276	-0.21255	148	-0.13	-1.11	0.16	0.261388
YOL125W	-0.67585	-0.70203	-0.02619	72	-2.94	-0.77	0.1	0.343198
YJR001W	-0.38275	-0.65781	-0.27506	58	12.69	5.87	0.15	0.424759
YDR054C	0.62865	0.53556	-0.09309	173	1.12	-3.26	0.11	0.539044
YCL049C	0.80134	0.48099	-0.32036	140	-3.21	-4.59	-0.02	0.455893
YGL160W	-0.38887	-0.47968	-0.09081	90	-6.09	0.88	0.21	0.50363
YPR108W	0.15665	0.30801	0.15136	73	-28.8	-30.95	0.28	0.517752
YLR180W	0.82347	0.7629	-0.06057	58	10.71	26.57	0.37	0.575959
YDR056C	0.34636	0.53885	0.19249	61	12.51	28.06	0.19	0.52062
YJL133C-A	0.53701	0.41848	-0.11853	59	-21.85	-20.04	-0.22	0.354947
YMR145C	0.01363	-0.00065	-0.01429	69	9.84	7.86	0.24	0.660274
YNR050C	0.49303	0.49982	0.00679	107	-1.4	14.93	0.16	0.438264
YGL001C	0.49768	0.36579	-0.13189	58	-7.66	-1.79	-0.11	0.646784
YLR340W	0.69771	0.58048	-0.11723	63	19.79	23.89	0.18	0.443839
YDR525W-A	1.34887	1.56445	0.21558	77	0.85	4.41	0.26	0.370431
YLR167W	0.23697	0.37184	0.13487	60	-25.98	-7.1	-0.88	0.472038
YKR051W	-1.36803	-2.13922	-0.77119	118	0.7	-2.53	0.3	0.319413
YJR041C	-0.56697	-0.7419	-0.17493	70	7.99	7.73	0.08	0.49621
YNL075W	0.40953	0.89413	0.4846	80	19.08	13.56	0.26	0.468495
YNR051C	-0.23924	-0.27752	-0.03829	713	-3.59	8.95	0.15	0.570006
YFL007W	-1.32254	-1.63538	-0.31284	131	-8.31	1.47	0.06	0.284769
YLR019W	-0.09173	-0.08479	0.00693	207	17.52	-0.62	0.19	0.296747
YMR246W	0.36192	0.41853	0.05661	229	19.8	35.05	0.14	0.658055
YJR139C	0.78241	0.81343	0.03102	88	-10.36	-0.59	-0.08	0.587079
YKL053C-A	1.9445	1.79783	-0.14667	75	-4.68	2.91	0.1	0.273718
YBR135W	0.88977	0.8702	-0.01957	86	-9.35	-1.22	0.44	0.335808
YIL021W	0.68991	0.52896	-0.16095	65	-4.12	-0.95	0.19	0.608058
YIL125W	-0.16183	-0.27121	-0.10938	60	-0.06	4.38	-0.25	NA
YER073W	-0.01703	-0.02589	-0.00886	176	-5.52	5.91	-0.11	0.562049
YDL215C	-0.50931	-0.43726	0.07205	214	2.88	4.09	0	NA
YKL170W	0.49272	1.0484	0.55568	76	1.58	4.85	0.21	0.458285
YJL078C	0.39948	0.35397	-0.04551	66	-17.36	15.14	-0.03	0.191183
YDR459C	-2.01762	-2.46097	-0.44335	77	0.61	6.58	0.15	0.477425
YGR094W	-0.2329	-0.18618	0.04672	83	-3.83	0.22	0.03	NA
YLL029W	-0.37398	-0.6954	-0.32142	129	5.01	6.79	0.14	0.361281
YNR052C	0.64681	0.5378	-0.109	97	-2.22	13.39	0.03	0.257555
YGL155W	-1.1565	-1.08684	0.06965	127	-4.78	1.12	0.01	0.628618
YBR199W	0.04075	-0.01897	-0.05972	75	3.34	3	0.17	0.312237
YDR533C	0.93006	0.84918	-0.08089	59	-11.9	0.45	-0.1	0.548233
YMR013C	-0.96088	-1.1851	-0.22422	108	-3.55	2	0	NA
YPL274W	-0.22718	-0.43735	-0.21017	62	-7.07	4.32	0.43	0.652961
YNL044W	0.50843	0.6157	0.10727	60	11.9	21.46	0.61	0.604035
YDL055C	1.09504	1.19965	0.10462	151	-5.49	50.04	1.1	0.527559
YKL211C	0.52432	0.30531	-0.21901	73	10.4	-2.02	0.12	0.963617
YBR164C	0.57383	0.56222	-0.01161	112	9.46	22.02	0.29	0.634201
YPL245W	0.11673	-0.06158	-0.17831	55	-31.98	15.39	-0.61	0.600331
YGL101W	0.08155	0.35972	0.27817	104	1.31	11.73	-0.16	0.816887
YBR094W	-0.21164	-0.34804	-0.1364	57	-4.95	-2.41	0	0.386813
YPL214C	-0.70416	-0.73485	-0.03069	61	-26.01	-25.09	0.05	0.394825
YBR072W	1.74308	1.6188	-0.12427	61	-8.33	1.37	-0.06	0.578126
YKL112W	0.20093	0.09614	-0.10479	102	-8.54	3.25	0.26	0.423134
YER027C	0.82723	0.8454	0.01817	109	9.91	10.64	-0.08	0.642393
YDR335W	-1.03012	-1.32814	-0.29802	362	10.7	9.09	0.07	NA
YDR367W	-0.35664	-0.58078	-0.22414	91	-17.14	-0.14	-0.3	0.328016
YER018C	0.0302	0.13798	0.10778	96	5.17	34.47	-0.04	0.575386
YDR204W	0.23595	0.00012	-0.23583	95	-5.88	-5.27	-0.22	0.26099
YKL186C	0.62991	0.54246	-0.08745	358	-1.43	4.69	0.21	0.412715
YOR117W	0.53832	0.63215	0.09383	64	-2.43	-0.32	-0.16	0.559452
YMR152W	0.28452	0.23163	-0.05289	72	0.87	4.69	0.01	0.573479
YGR180C	0.8432	0.87289	0.02969	195	0.5	-4.86	0.28	0.516087
YMR131C	-0.05064	-0.12387	-0.07324	94	-37.89	-28.07	-0.04	0.595274
YGR279C	1.16133	1.10946	-0.05186	82	23.45	49.31	0.73	0.56343
YDR264C	-0.56202	-0.84512	-0.2831	58	-31.02	-14	0.6	0.320426
YLR099C	-0.51455	-0.62017	-0.10561	85	-3.57	-44.57	0.24	0.311668
YHR181W	0.33573	0.37164	0.03591	60	-21.3	-2.39	-0.42	0.42568
YJL167W	1.10322	1.21117	0.10795	58	-4.23	1.18	0.52	0.724071
YBR096W	0.54569	0.38832	-0.15737	85	-5.77	13.78	0.51	0.580002
YGR149W	-0.34096	-0.41361	-0.07266	169	-7.66	-9.09	-0.04	0.414484
YKR044W	-0.75826	-0.80744	-0.04917	67	-6.82	-20.79	-0.05	0.582758
YGR031W	-0.10975	0.0142	0.12395	146	10.78	-2.62	0.15	0.351714
YOR377W	-2.26193	-2.9977	-0.73577	83	3.74	6.45	0.1	0.28975
YIL020C	0.34708	0.6999	0.35282	54	-1.36	-1.36	0.04	0.676875
YLR129W	-0.68675	-0.79039	-0.10365	103	-1.28	6.82	-0.08	0.374653
YOR320C	-0.84302	-1.16632	-0.3233	94	-23.93	-13.73	0.22	0.355664
YGR200C	-0.38154	-0.45559	-0.07405	62	1.37	-4.71	0.5	0.459195
YHR005C	0.1204	0.09123	-0.02917	85	2	23.21	0.12	0.478205
YEL032W	-0.61997	-0.57916	0.04081	54	-20.98	-4.92	-0.05	0.470782
YGR264C	0.03312	0.13429	0.10117	54	-12.02	-4.65	-0.53	0.598572
YGL028C	0.49485	0.55462	0.05976	162	6.63	11.26	0.37	0.52745
YHR089C	1.1617	1.41284	0.25114	55	-9.49	23.63	0.01	0.622471
YOR133W	0.34664	0.30083	-0.04581	62	-0.14	72.67	0.29	0.840249
YPL163C	0.7767	0.77653	-0.00017	65	-6.94	-6.64	0.43	0.507859
YFL038C	0.94293	1.03361	0.09068	53	-9.34	-9.04	-0.17	0.523621
YPR145W	0.22776	0.07315	-0.1546	56	1.98	39.33	-0.53	0.531061
YKR026C	0.33916	0.54871	0.20954	87	-6.39	27.64	-0.14	0.363477
YKR018C	-0.29355	-0.38148	-0.08792	53	6.18	15.3	0.11	0.795955
YOL126C	0.42251	0.3877	-0.03482	171	5.02	10.19	0.08	0.526828
YIL046W	-0.73872	-0.88109	-0.14237	95	-1.69	1.81	0	0.19332
YGL037C	1.27179	1.29935	0.02756	56	-34.43	-19.62	-0.46	0.590804
YOR217W	-0.24465	-0.16182	0.08283	74	-7.69	-1.91	-0.1	0.487063
YMR080C	-0.76193	-1.07569	-0.31376	81	11.76	14.26	0.31	0.368811
YHR138C	1.09642	1.16922	0.0728	54	-12.89	-9.05	-0.21	0.314542
YHR170W	0.08093	0.09996	0.01903	53	-40.06	7.76	-0.96	0.427866
YBR070C	-0.334	-0.39096	-0.05696	66	-26.86	4.46	-0.5	0.326692
YMR105C	0.63972	0.55195	-0.08777	61	1.69	0.32	0.04	0.526707
YIL027C	0.47292	0.40793	-0.065	60	4.9	4.56	0.27	0.469785
YMR008C	0.13964	0.05721	-0.08243	272	-2.4	0.66	0.07	NA
YDR319C	-0.50185	-0.58699	-0.08513	138	4.64	4.38	0.12	0.318901
YGR266W	-0.01337	-0.12024	-0.10687	69	1.18	16.8	-0.11	0.753439
YJL130C	-0.25386	-0.1565	0.09736	625	13.09	51.82	0.05	NA
YGR019W	0.77519	0.4355	-0.33968	124	3.2	0.09	0.03	0.732432
YLR363W-A	1.1655	1.09375	-0.07175	59	-23.81	-2.93	-0.51	0.614681
YNL036W	0.76596	1.07568	0.30973	53	15.19	16.66	0.57	0.385176
YOR251C	0.79548	0.74499	-0.05049	53	-4.1	4.17	-0.22	0.344113
YEL026W	0.81519	0.95194	0.13675	106	-5.68	19.08	-0.07	0.937883
YER094C	0.83632	0.945	0.10868	215	-32.29	22.66	-0.17	0.733423
YER143W	0.84971	0.84104	-0.00867	67	-3.08	1.5	0	0.660119
YJL052W	1.65118	1.69296	0.04178	76	10.59	54.2	0.25	0.572013
YBR039W	0.70568	0.83915	0.13347	93	0.86	-7.4	0.26	0.34289
YGR060W	0.80385	0.80092	-0.00293	73	7.09	36.35	0.22	0.779944
YBR200W	-0.53918	-0.28154	0.25765	54	-24.44	2.18	-0.44	0.394903
YHR149C	-0.6524	-0.45642	0.19598	55	7.39	2.74	0.16	0.365013
YDR452W	-0.59435	-0.71735	-0.123	152	-3.49	15.29	-0.06	0.370125
YBR126C	1.04151	1.19411	0.1526	60	7.48	14.29	0.45	0.538406
YOR260W	-0.49433	-0.41392	0.08041	53	2.66	45.82	-0.24	0.436744
YJR125C	0.80866	1.10542	0.29676	62	-9.58	-10.43	0.44	0.41438
YBR085W	-0.08844	0.05064	0.13908	91	-2.59	-7.76	-0.06	0.60006
YER090W	0.53617	0.55108	0.01491	52	-13	2.3	0.6	0.652686
YKL073W	0.05187	0.13391	0.08203	93	4.99	3.57	-0.04	0.376295
YDR411C	0.11101	0.22792	0.11691	52	5.56	18.28	0.32	0.646087
YOR131C	0.53315	0.73898	0.20583	66	-6.3	5.03	0.36	0.548719
YBR170C	0.36795	0.29996	-0.06799	52	2.75	7.37	0.1	0.356166
YOR132W	-0.32604	-0.22991	0.09613	65	-3.17	2.87	0.07	0.657908
YPL177C	0.46039	0.636	0.17561	407	-21.59	-16.67	0.08	0.473843
YDR397C	0.19069	0.09468	-0.09602	52	7.57	23.13	-0.08	0.48432
YGR004W	-0.10019	-0.56385	-0.46365	53	-1.23	0.72	0.11	0.262675
YEL036C	-0.02992	-0.0498	-0.01989	123	5.11	9.79	0.14	0.451142
YHR012W	0.17441	0.09822	-0.07618	156	4.54	2.73	-0.07	0.422137
YBR276C	-2.57478	-2.76655	-0.19177	76	-36.68	-10.04	-0.03	0.647917
YER048C	0.78874	0.83897	0.05023	67	1.79	9.8	0.12	0.32306
YKR014C	1.0074	1.11695	0.10955	133	-4.77	16.28	0.05	0.357503
YLR212C	-0.41583	-0.33279	0.08304	160	-9.17	-8.88	-0.04	0.352435
YPL266W	0.46426	0.51979	0.05553	52	0	-2.81	0.04	0.410131
YLL041C	0.79187	0.87908	0.0872	54	-8.35	12.51	-0.3	0.320152
YLR355C	1.2763	1.21801	-0.0583	63	11.48	17.17	0.96	0.521627
YPR036W-A	1.66073	1.7167	0.05597	62	30.89	34.63	0.99	0.604292
YNL207W	0.56991	0.38222	-0.18769	128	-41.71	14	-0.14	0.395688
YDR276C	1.70672	1.92326	0.21654	52	-8.19	27.92	-0.4	0.748097
YDL198C	0.61254	0.74596	0.13342	141	-21.72	27.82	-0.1	0.547325
YJR048W	1.35112	1.40713	0.05601	51	-41.34	-48.33	-0.43	0.739306
YPR114W	-0.13777	-0.28208	-0.14431	51	22.21	28.83	1.26	0.757359
YBR023C	-0.75057	-0.85498	-0.10441	51	-22.96	5.62	-0.4	NA
YPL081W	1.54509	1.65202	0.10693	57	9.78	5.81	-0.24	0.546693
YOR095C	0.22288	0.1858	-0.03708	59	1.8	31.35	-0.26	0.779726
YNL141W	0.60038	0.47675	-0.12363	57	-18.29	12.13	-0.36	0.717679
YOL062C	-1.27977	-1.22024	0.05953	188	-2.31	15.59	-0.02	0.461304
YPL170W	0.85397	0.92608	0.07211	110	-8.76	-1.99	0.03	0.476498
YBR202W	-0.26463	-0.44039	-0.17576	77	-3.41	8.69	-0.03	0.325036
YIL085C	-1.12195	-1.47623	-0.35428	71	4.74	21.73	-0.13	0.491558
YPR010C	-0.63266	-0.63413	-0.00147	53	21.34	7.33	1.2	0.278275
YGL067W	-0.22915	-0.44734	-0.21819	118	0.16	2.79	0.06	0.370493
YKR003W	-0.20766	0.06891	0.27657	88	-8.78	-2.37	-0.02	0.444975
YML027W	0.55123	0.93575	0.38452	103	1.15	5.89	0.2	0.373717
YMR216C	-0.95403	-1.00691	-0.05288	189	3.31	10.9	0.01	0.483998
YBR068C	-0.43945	-0.48162	-0.04217	52	7.61	15.02	0.33	0.496415
YOR369C	0.02499	0.10809	0.0831	70	-26.29	16.16	0.15	0.826055
YOR084W	-2.70211	-2.54164	0.16047	101	12.9	12.39	0.11	0.559164
YLR328W	-0.5482	-0.34174	0.20646	194	-7.14	1.08	0.02	0.545787
YCR069W	0.15207	0.18379	0.03172	211	-0.19	-5.47	0.42	0.464103
YEL056W	-0.41688	-0.36301	0.05388	53	1.71	-7.52	0.14	0.488716
YOR091W	0.71593	0.97991	0.26398	63	1.48	-0.88	0.13	0.459363
YBL093C	0.37646	0.69067	0.3142	108	12.02	-0.07	0.31	0.825631
YDR302W	0.59118	0.88287	0.29168	144	1.35	15.73	0.05	0.563912
YDL128W	0.52833	0.47058	-0.05775	91	-0.12	-0.7	0.34	0.568716
YHR115C	-0.37268	-0.64754	-0.27486	161	11.19	27.14	0.42	0.383663
YER122C	0.31852	0.21254	-0.10599	83	-12.4	19.37	0.02	0.446691
YGL194C-A	-0.25122	-0.46444	-0.21322	50	-13.25	-0.88	-0.16	0.67819
YJL205C	0.07445	1.21072	1.13627	52	-11.11	-11.59	-0.31	0.555519
YJR076C	0.41231	0.36618	-0.04614	50	5.56	9.39	0.19	0.439887
YMR089C	-0.95568	-1.25542	-0.29974	117	-11.95	6.81	0.12	0.334254
YOR226C	0.93585	1.00205	0.0662	50	-9.13	14.08	-0.32	0.390685
YJL154C	-0.95594	-0.91619	0.03975	56	0.82	7.31	0.12	NA
YBR248C	0.30102	0.34586	0.04484	83	15.96	9.66	0.04	0.337675
YLR314C	0.5606	0.71611	0.15551	72	9.73	19.42	0.42	0.344607
YBR188C	0.48945	0.72086	0.23142	65	-2.51	3.62	0.15	0.375925
YBR015C	-0.09396	0.07521	0.16916	108	0.87	23.68	0.36	0.290471
YPR139C	-0.32027	-0.24562	0.07465	50	-1.34	6.8	0.32	0.47351
YLR439W	0.4549	0.59518	0.14028	50	-0.19	5.57	0.04	0.601026
YJL111W	0.03475	0.05435	0.0196	167	-0.34	13.88	0.14	0.481172
YBR230W-A	1.43282	0.79642	-0.63639	49	-17.79	1.59	-0.42	0.32308
YNL156C	-0.01293	-0.01558	-0.00265	173	14.21	23.87	0.19	0.497246
YGL068W	0.75686	0.6512	-0.10565	49	-24.17	16.93	-0.29	0.38233
YAL049C	0.6979	0.45393	-0.24397	50	4.31	25.72	-0.43	0.456018
YOR239W	0.40194	0.55448	0.15254	50	-1.16	3.61	0.08	0.652953
YLR356W	1.05371	0.91201	-0.14169	52	-8.87	6.32	-0.07	0.839894
YBR061C	0.79976	0.94134	0.14158	56	4.45	24.7	-0.12	0.617264
YOL041C	0.84951	1.04043	0.19093	49	0.13	14.03	0.04	0.647669
YPL162C	-0.07636	-0.03128	0.04507	97	4.79	8.83	0.1	0.465982
YDR337W	0.38218	0.82161	0.43943	51	-41.69	-1.62	-0.58	0.560048
YLR002C	0.10265	0.30836	0.20571	53	-1.95	6	-0.01	0.766699
YGR048W	0.70697	0.84299	0.13602	52	0.28	2.55	-0.03	0.837623
YGL181W	0.74004	0.70975	-0.03029	55	-4.52	-1.45	0	0.558505
YER060W	-1.53159	-1.34612	0.18546	147	22.84	26.08	0.15	0.711275
YGR227W	-0.06344	-0.39697	-0.33353	96	2.26	1.66	0.25	0.537485
YGR012W	-0.00708	-0.35759	-0.35051	140	-1.95	7.15	-0.01	0.33774
YKL096W	1.12348	0.96791	-0.15556	49	-6.2	22.04	-0.24	0.558703
YOR085W	0.31883	0.02443	-0.29441	53	-9.71	1.96	1.13	0.594506
YNL116W	0.08714	0.2295	0.14237	50	-5.2	-5.47	0.71	0.353019
YCR009C	0.74106	0.74642	0.00536	50	-19.88	1.21	-0.25	0.567891
YDR059C	0.95269	0.90354	-0.04915	49	-29.58	9.66	-0.92	0.877912
YBR093C	0.88261	0.77289	-0.10972	49	3.36	12.61	0.06	0.477824
YNL239W	0.61704	0.54675	-0.07028	106	23.93	30.09	0.32	0.554451
YDR510W	1.10693	1.44155	0.33463	70	-1.49	28.74	0.13	0.357078
YNL064C	0.91803	1.03131	0.11328	197	-8.8	12.3	0.43	0.690257
YBL056W	-0.27153	-0.27296	-0.00143	82	-23.35	-13.58	0.15	0.523713
YOL143C	0.93354	1.05994	0.1264	49	-82.18	-32.34	-0.48	0.332454
YNL192W	-0.73882	-0.75256	-0.01375	118	-1.91	-17.16	0.12	0.532641
YGL200C	0.69519	0.74618	0.05099	50	-2.33	9.83	0.55	0.484778
YDR382W	0.90815	0.8514	-0.05675	67	-12.82	-24.79	-0.42	0.527639
YPL178W	0.66505	0.74366	0.07862	50	5.73	3.61	0.29	0.538602
YFL018C	0.50917	0.46874	-0.04043	94	0.2	4.41	0.43	0.559527
YHR051W	1.08444	1.26092	0.17647	52	0.32	15.51	0.17	NA
YDL081C	1.0018	0.95906	-0.04274	48	-0.24	29.91	-0.62	0.721808
YML081W	-2.21467	-2.09641	0.11826	96	7.12	1.15	0.16	0.416331
YGL202W	0.73931	0.76915	0.02984	120	-5.27	20.81	0.61	0.559459
YMR015C	0.77346	0.88026	0.10679	181	19.59	-3.48	0.02	0.669423
YLR214W	-0.49684	-0.69356	-0.19672	132	0.32	-1.89	0.26	0.614753
YBL024W	0.4068	0.37767	-0.02913	113	-14.67	0.72	-0.03	0.601787
YBR264C	0.60063	0.18401	-0.41662	127	1.98	7.33	0.02	0.39477
YJR007W	0.51264	0.57544	0.0628	87	13.88	12.76	0.6	0.604051
YDL018C	0.50691	0.41792	-0.089	62	-3.21	3.91	0.19	0.415821
YDR300C	0.10038	0.37724	0.27686	144	-31.8	-1.75	-0.13	0.394784
YMR012W	-0.30716	-0.40388	-0.09672	126	-3.44	-4.9	0.34	0.263348
YKR013W	0.91641	0.88257	-0.03383	52	-14.85	26.69	-0.24	0.570137
YNR067C	-0.07583	-0.22572	-0.14988	48	-6.5	6.84	-0.03	0.284077
YPR056W	0.15921	-0.03949	-0.1987	48	-8.21	-3.53	-0.28	0.662401
YHR107C	0.83154	0.7285	-0.10304	50	0.3	4.56	0.34	0.567107
YKR080W	0.24877	0.16634	-0.08243	152	-7.5	-6.04	0.44	0.507151
YJR101W	0.3659	0.27188	-0.09401	82	-16.12	1.4	0.16	0.518847
YER012W	0.15727	0.40951	0.25224	48	-12.97	30.14	-0.53	0.640302
YOL052C	0.28535	0.32113	0.03578	54	10.07	6.83	0.12	0.490115
YCR057C	-0.57222	-0.64961	-0.0774	128	4.08	2.26	0.25	0.34041
YBR242W	0.40051	0.52094	0.12044	166	9.37	-5.47	-0.06	0.596915
YOR213C	-0.50205	-0.68167	-0.17961	109	-3.13	12.6	-0.09	0.327169
YOR231W	-0.96023	-0.77932	0.18091	87	4	10.81	0.11	0.4761
YJR058C	-0.41252	-0.28424	0.12828	73	-1.14	8.71	-0.15	0.814572
YDR292C	-0.10102	-0.25808	-0.15706	117	5.98	21.86	-0.02	0.3215
YGR033C	-0.26908	-0.20832	0.06077	87	-20.03	8.52	-0.26	0.50664
YPL010W	0.71386	0.77058	0.05672	68	10.52	1.26	0.49	0.55484
YGR132C	0.15941	0.3436	0.18419	50	-17	23.18	-0.32	0.688277
YML115C	-0.05527	-0.14068	-0.08541	47	-2.15	3.02	0.18	0.638121
YKL120W	0.44843	0.48068	0.03225	79	-1.67	4.96	0.05	0.621347
YGL030W	0.83418	0.91092	0.07674	47	15.55	13.07	0.52	0.457174
YEL050C	-0.18325	-0.4365	-0.25325	47	-7.25	9.72	-0.27	0.463626
YCR005C	0.03977	-0.18953	-0.2293	47	0.74	-4.04	0.12	0.642434
YEL037C	1.23536	1.4091	0.17375	152	16.1	13.03	0.43	0.720298
YGL079W	-0.71561	-0.38913	0.32648	52	-8.18	-2.02	-0.02	0.486095
YDR268W	0.26957	0.08646	-0.18311	84	-8.12	-4.32	-0.06	0.394327
YOL077C	0.28313	0.63512	0.35199	47	13.75	28.54	0.06	0.791603
YDR265W	-0.98277	-0.72822	0.25455	104	-18.53	-9.85	-0.23	0.542685
YGL167C	-0.92612	-1.12514	-0.19902	130	21.13	19.7	0.52	0.495801
YIR037W	1.42239	1.36973	-0.05266	47	1.25	31.38	0.9	0.480605
YFR009W	0.10871	-0.03012	-0.13883	62	-4.22	-15.01	-0.47	0.54161
YKR071C	0.68498	0.6683	-0.01668	49	13.86	13.38	0.46	0.402968
YPR148C	0.09527	0.14621	0.05094	56	-12.01	8.29	0.14	0.674878
YOR120W	0.78688	0.796	0.00912	47	-2.95	4.67	-0.03	0.739975
YEL002C	0.52002	0.57987	0.05984	54	-0.7	11.81	-0.41	0.276287
YGR189C	0.62461	0.56124	-0.06337	72	-17.54	-11.34	-0.34	0.471301
YJL138C	0.66518	0.54537	-0.11982	89	9.04	29.14	0.54	0.588228
YBR187W	-0.38157	-0.08779	0.29379	115	-10.46	-15.59	0.58	0.337356
YNL160W	1.2724	1.25147	-0.02093	57	-17.45	7.84	-0.19	0.399971
YHL011C	0.2739	0.2965	0.02259	95	-7.91	18.97	0.43	0.650319
YLR186W	0.58294	0.63686	0.05392	47	12.85	17.89	0.32	0.274566
YHR087W	1.48833	1.75948	0.27115	69	-2.51	-11.89	0.04	0.74409
YGR253C	0.57402	0.55111	-0.02291	46	-19.65	7.36	-0.52	0.390092
YDL201W	0.64694	0.75019	0.10325	58	4.37	9.41	0.06	0.433428
YOL002C	0.12678	0.42488	0.29809	54	-12	-7.36	0.11	0.479883
YBL050W	0.7797	1.07571	0.29601	76	3.28	4.49	0.11	0.790341
YDR044W	0.68082	0.4424	-0.23843	124	4.23	27.32	0.05	0.752372
YOR103C	0.31619	0.16322	-0.15297	46	7.34	1.91	0.45	0.568447
YDR267C	-0.03483	-0.76269	-0.72786	46	-3.41	-2.85	0.27	0.355006
YDR028C	-0.4738	-0.47813	-0.00433	319	10.88	15.9	0.07	NA
YBR121C	0.11375	0.16022	0.04647	82	4.64	43.88	0.27	0.520542
YOR297C	1.00938	0.47067	-0.5387	61	-16.88	6.38	-0.36	0.305101
YBR293W	-2.19433	-2.08463	0.1097	490	0.14	1.21	-0.01	NA
YML001W	0.61413	0.86332	0.24918	85	5.14	-3.16	0.21	0.563208
YJL011C	0.97533	1.35868	0.38336	46	-14.66	-4.87	-0.16	0.318725
YJR010W	-1.75989	-2.26057	-0.50068	91	-7.85	5.26	-0.26	NA
YOR099W	0.33525	0.23842	-0.09683	70	22.17	28.18	0.97	0.699124
YPL218W	0.59363	0.73454	0.14091	49	-36.15	22.32	0.24	0.657248
YLR183C	0.54774	0.00086	-0.54688	47	5.47	14.2	-0.06	0.264052
YMR262W	-0.46302	-0.80899	-0.34598	46	-6.53	14.63	-0.05	NA
YOR016C	0.60387	0.21188	-0.39199	88	-28.57	-13.07	-0.07	0.308607
YIL137C	0.08568	0.17675	0.09107	51	-9.28	15.45	-0.25	0.657482
YNL185C	0.8335	0.84628	0.01278	100	10.92	6.82	0.2	NA
YJL121C	0.91872	0.79142	-0.1273	101	1.53	45.07	-0.15	0.628561
YCR027C	0.00295	0.05256	0.04961	200	-6.52	7.73	0.11	0.500719
YDR297W	0.46711	0.44356	-0.02355	60	-17.47	21.59	-0.21	0.385048
YBR069C	-0.31739	-0.49468	-0.1773	102	8.9	9.67	-0.19	0.610102
YMR203W	0.72236	0.68236	-0.03999	56	5.61	23.67	0.5	0.577287
YLR110C	1.39163	0.92691	-0.46472	46	-15.63	88.2	-0.66	0.527813
YHR174W	1.24525	1.335	0.08975	123	-4.99	21.76	0.23	0.825631
YBR082C	1.8329	1.81754	-0.01536	211	-3.62	18.7	0	0.810068
YDR178W	0.6639	0.68158	0.01768	188	-22.04	-4.13	0.04	0.33518
YIL162W	-0.20425	-0.23172	-0.02747	219	1.07	1.07	-0.03	NA
YKR070W	-0.11758	0.21685	0.33443	62	-26.4	13.98	-0.43	NA
YOR356W	-0.29099	-0.52555	-0.23456	82	3.34	-0.91	0.01	0.442815
YLR153C	0.65937	0.60025	-0.05911	57	9.06	7.12	0.42	0.580974
YDL072C	0.73656	0.71819	-0.01836	45	-14.3	-0.91	0.83	0.486472
YGL082W	0.39265	0.34254	-0.05011	80	-10.43	2.38	0.11	0.573233
YDL219W	0.22039	0.67515	0.45476	45	-0.68	-13.63	0.07	0.417393
YPL067C	0.73426	0.56234	-0.17192	45	0.3	7.89	-0.07	0.448555
YKL087C	0.56947	0.97539	0.40593	90	7.06	3.33	0.12	0.308848
YCR030C	-0.06306	-0.03224	0.03081	51	-12.43	-5.05	-0.11	0.256438
YPL093W	-0.27866	-0.29366	-0.015	59	-7.12	11.03	0.52	0.362792
YDR296W	0.73097	0.78396	0.05299	56	-5.3	3.32	0.13	0.342912
YOR155C	-0.2402	-0.19133	0.04887	198	2.84	-8.81	0.01	NA
YNL323W	0.30032	0.10823	-0.19209	53	-10.87	1.71	-0.16	0.42197
YPL058C	-0.86926	-0.84379	0.02547	170	7.82	-9.56	-0.05	NA
YHR057C	0.00365	0.21284	0.20919	48	-5.67	2	0.01	0.5808
YOR157C	0.81832	0.82523	0.00691	45	0.81	8.16	0.03	0.32683
YBL039C	0.3805	0.12201	-0.2585	56	-7.35	9.47	0.14	NA
YHR179W	1.06781	1.04054	-0.02728	48	-20.72	0.95	-0.07	0.450151
YLR359W	0.23732	0.31772	0.0804	60	0.67	17.21	0.62	0.73228
YDR226W	1.29899	1.3986	0.09961	45	-23.27	6.27	-0.17	0.686817
YGR082W	1.10491	1.10758	0.00266	49	6.68	44.85	0.15	0.45033
YBL038W	0.52447	0.69541	0.17095	50	-3.73	18.81	-0.31	0.434729
YNL100W	0.91467	0.64389	-0.27078	44	-9.6	17.72	0.01	0.654875
YDR529C	1.49784	1.66273	0.16489	47	-15.91	14.85	-0.98	0.668163
YKR062W	0.55665	0.5807	0.02405	55	-15.62	-17.75	0.46	0.374483
YOR098C	-0.47975	-0.48779	-0.00804	55	-1.22	5.82	0.13	NA
YOL042W	-0.09957	-0.19976	-0.10019	47	-20.01	-1.49	-0.43	0.689678
YNL240C	-0.3058	-0.55515	-0.24935	178	-43.09	-6.24	-0.06	0.40636
YDR189W	0.06171	0.08623	0.02452	45	6.77	9.79	0.21	0.637539
YPL243W	-0.14414	-0.10995	0.03419	92	2.51	1.16	0.31	0.667228
YPR190C	-0.68665	-0.32233	0.36432	44	0.84	1.19	-0.04	0.398918
YDR388W	0.34656	0.31691	-0.02965	44	-9.98	8.76	-0.06	0.270612
YKL099C	0.64234	1.06093	0.41859	62	-1.49	11.96	0.34	0.621056
YML064C	0.03948	0.16805	0.12857	63	2.62	20.21	-0.01	0.685479
YCR047C	0.96632	1.04562	0.0793	90	-7.17	-3.3	0	0.644068
YPL112C	-0.06895	0.23607	0.30502	64	4.37	23.68	0.55	0.646183
YDR465C	0.22565	0.15025	-0.07539	46	0.23	5.36	0.39	0.465155
YDR309C	0.79052	0.87827	0.08775	52	-5.14	-0.1	0.08	0.527302
YGL157W	0.67656	0.73856	0.06201	44	-23.3	-17.87	-0.03	0.605019
YIL093C	0.50866	0.34184	-0.16683	69	-9.27	-9.98	0.13	0.384356
YNL182C	-0.09703	-0.08631	0.01072	60	2.28	-24.77	-0.04	0.641412
YOL088C	0.32467	0.34781	0.02314	77	-28.19	-6.97	-0.29	0.319888
YPR074C	0.28579	0.18438	-0.10141	101	15.77	17.18	0.55	0.816887
YJL159W	1.40986	1.3309	-0.07897	56	-52.53	16.42	0.19	0.443951
YEL051W	0.18286	0.35883	0.17597	43	-20.7	17.36	0.07	0.970252
YPL262W	0.31606	0.29185	-0.02421	45	-17.55	6.88	-0.21	NA
YGR208W	0.53975	0.61843	0.07868	43	-7.46	18.15	0.44	0.790341
YER124C	-0.08509	0.0307	0.11579	50	-2.04	-0.07	0.45	0.353609
YGR173W	0.51484	0.73505	0.22021	45	-10.53	15.02	-0.44	0.708191
YHL004W	-0.04021	-0.16093	-0.12071	82	1.56	3.36	0.34	0.216869
YGR245C	-0.23093	-0.6258	-0.39486	107	1.12	11.19	0.28	0.707199
YHR122W	0.9449	0.97681	0.03191	55	-12.09	0.91	-0.02	0.497253
YMR183C	0.75637	0.70376	-0.05261	69	7.52	13.44	0.49	0.403375
YBL042C	-0.05805	-0.06016	-0.00211	49	-2.07	5.7	0.09	0.439015
YDR415C	0.28425	0.41286	0.12861	47	-20.31	-16.52	0.12	0.369731
YGL140C	-1.4041	-1.78871	-0.38462	47	-7.37	-9.02	0.03	NA
YLR104W	0.60328	0.58395	-0.01933	43	-2.23	-1.17	0.02	0.292973
YKL130C	0.63086	0.67101	0.04015	52	-6.01	4.71	0.02	0.571401
YBR014C	0.8801	0.76641	-0.1137	63	-1.62	-13.91	0.01	0.661464
YDR035W	0.55559	0.42431	-0.13128	81	1.52	23.42	0.47	0.361467
YPL129W	0.80848	1.12424	0.31576	54	15.44	10.57	0.47	0.46319
YOL060C	-0.5765	-0.64067	-0.06416	101	5.1	3.98	0.14	0.471218
YDR272W	0.98729	1.01787	0.03058	43	4.77	-2.94	0.2	0.50502
YEL007W	-0.78555	-0.99723	-0.21168	235	26.35	32.25	0.4	NA
YGR167W	0.93778	1.24239	0.30461	53	9.08	33	0.13	0.571704
YPL057C	-0.54262	-0.27736	0.26526	168	0.27	2.95	0.3	0.397184
YLL043W	-0.53923	-0.37312	0.16611	79	-5.76	11.24	0.06	0.494187
YOL121C	1.38492	1.58096	0.19605	49	-2.89	-0.38	-0.02	0.675488
YFR051C	0.17683	0.19739	0.02056	43	-24.62	-30.5	0.03	0.50695
YLR354C	0.80956	0.96051	0.15095	43	-23.83	7.89	-0.7	0.735825
YLR249W	0.24355	0.32789	0.08435	43	-54.41	20.66	-1.85	0.817464
YLR021W	-0.11689	0.05231	0.1692	42	-2.29	-0.2	-0.02	0.498462
YBR104W	-0.07397	-0.03322	0.04075	59	-4.06	-6.71	0.27	0.410826
YGR181W	0.80894	0.99222	0.18328	54	4.81	23.89	-0.12	0.570006
YNL147W	1.09672	1.42136	0.32463	217	6.66	16.54	0.18	0.61225
YER063W	0.76404	0.79219	0.02815	67	-7.96	3.85	0.12	0.557275
YDL143W	0.04682	0.06434	0.01752	42	-15.86	0.08	0.04	0.638392
YLR193C	0.78872	0.35715	-0.43157	54	0.75	-3.62	0.22	0.380732
YPL184C	-0.71909	-0.65453	0.06456	178	4.58	4.69	0.06	0.523262
YEL017W	0.34539	0.46595	0.12056	129	-5.12	17.87	0.05	0.467843
YMR258C	-1.23333	-0.62572	0.60761	46	6.96	5.25	0.07	0.449257
YGL020C	0.49122	0.76063	0.26941	53	4.24	29.81	-0.17	0.467664
YPR118W	-0.10505	-0.06266	0.04239	42	-15.32	15.27	0.04	0.668192
YGR008C	1.88092	2.05147	0.17055	73	-10.43	5.48	0	0.628561
YDL202W	1.05144	0.79065	-0.26079	42	-2.62	4.15	0.08	0.529987
YBR166C	0.06284	0.11942	0.05658	46	1.14	10.15	-0.03	0.595238
YGR201C	-0.82346	-0.4243	0.39916	82	-4.69	2.09	-0.09	NA
YPR019W	-0.31719	-0.35659	-0.03941	122	2.26	0.8	0.06	0.743509
YLR091W	-0.4342	-0.02696	0.40724	73	-0.98	4.12	0.07	NA
YKL137W	0.6619	0.9092	0.2473	54	10.6	26.83	-0.23	0.425508
YDR374W-A	-0.07935	-0.42688	-0.34753	42	-19.95	-9.45	-0.16	0.358456
YNL280C	0.22842	-0.01909	-0.24751	76	-17.91	-17.37	0.33	0.440811
YJL174W	0.87518	0.8065	-0.06868	117	-13.33	4.21	0.12	0.42315
YKL032C	0.6545	0.69268	0.03817	184	10.37	19.08	0.3	NA
YKL009W	0.79404	0.99552	0.20148	42	6.04	40.69	0.12	0.435779
YLR113W	-0.11895	-0.26769	-0.14874	324	9.58	-15.19	0.42	0.6119
YCR012W	0.93629	0.88902	-0.04726	43	14.53	46.35	0.34	0.854404
YNL096C	1.28539	1.26269	-0.0227	42	0.06	7.58	0.45	0.379602
YGR192C	0.92037	0.87133	-0.04904	42	7.57	64.49	-0.5	0.771813
YER100W	1.16361	1.23772	0.07411	266	2.9	-3.47	0.13	0.665985
YJR059W	-0.78252	-0.55401	0.2285	61	7.75	14.99	0.05	0.452182
YMR238W	-0.26347	-0.3738	-0.11033	128	16.58	7.78	0.06	0.384365
YML120C	0.34048	0.3632	0.02272	62	2	-7.53	0.44	0.424336
YKR068C	0.15034	0.67022	0.51988	43	-0.71	6.38	-0.02	0.846035
YGL040C	0.49434	0.38423	-0.1101	79	16.7	24.5	0.53	0.542859
YDR020C	-0.30275	-0.28812	0.01463	89	0.86	-3.38	0.04	NA
YLL058W	0.0532	-0.02877	-0.08197	41	0.28	12.19	0.06	0.389991
YLL018C-A	0.82082	0.77131	-0.04951	41	-15.83	3.82	-0.36	0.40307
YBL041W	0.87138	0.99023	0.11885	43	-16.63	10.59	-0.19	0.565066
YGR165W	0.47311	0.15896	-0.31415	58	5.27	0.48	0.03	0.37064
YMR153W	0.62978	0.78987	0.16009	41	-14.03	-6.97	-0.09	0.671442
YML121W	-0.49086	-0.05128	0.43958	137	-2.59	-6.8	-0.16	0.491812
YBR071W	1.07726	0.97281	-0.10445	60	9	17.82	0.13	0.418224
YKL039W	0.14228	0.13948	-0.0028	141	-4.6	15.49	0.11	0.39817
YER177W	1.11219	1.06015	-0.05204	41	-6.04	1.45	0.26	0.812027
YEL071W	0.39432	0.27261	-0.12171	51	-4.62	20.32	-0.18	0.394751
YER011W	0.68802	0.46223	-0.2258	65	-21.3	5.17	-0.04	0.940823
YJR148W	0.75639	0.49831	-0.25808	59	0.26	33.27	-0.05	0.422794
YGL087C	1.5892	1.52462	-0.06458	49	-2.55	-4.56	0.02	0.840053
YOR374W	0.94097	0.95549	0.01452	40	-2.33	-13.72	0.38	0.394338
YJL200C	-0.07642	-0.03601	0.04041	42	-7.94	1.53	-0.24	0.265741
YDL131W	0.6415	0.65486	0.01336	53	0.41	-0.63	-0.05	0.654375
YDR013W	0.07695	-0.23792	-0.31487	41	0.09	-0.15	0.06	0.500434
YAL039C	1.41057	1.28624	-0.12433	51	3.42	7.2	0.19	0.721687
YIL075C	-0.00166	-0.07552	-0.07386	54	1.93	7.94	0.4	0.779944
YOR298C-A	1.27632	1.25164	-0.02468	51	2.48	1.68	-0.04	0.826055
YNR061C	0.82015	0.56509	-0.25506	89	-11.8	-28.68	0.31	0.402181
YGR095C	0.77884	0.58635	-0.19249	40	-4.56	5.64	-0.17	0.587079
YLR250W	0.5703	0.61385	0.04355	40	-17.71	-7.77	0.09	0.298979
YDL124W	0.56661	0.57162	0.005	57	13.18	12.33	-0.03	0.455356
YLR154C	0.67869	1.0544	0.37571	62	-34.87	-27.39	-0.36	0.458082
YPR029C	-0.51058	-0.54449	-0.03392	49	-21.57	-5.44	-0.48	0.517923
YDL126C	0.2707	0.3311	0.0604	41	7.14	5.46	0.26	0.518189
YJL076W	-0.65935	-0.73461	-0.07527	46	15.99	14.47	0.41	NA
YMR005W	0.185	0.35466	0.16966	73	13.37	17.95	0.35	0.58224
YNL005C	-0.17064	0.07463	0.24527	47	-4.5	2.63	-0.18	0.319888
YEL027W	0.93845	0.84766	-0.09079	58	-6.33	-0.92	0.18	0.586086
YGR027C	0.32895	0.41403	0.08508	367	8.98	22.51	0.05	0.603248
YCL043C	0.7452	0.71242	-0.03278	40	12.11	21.86	1.04	NA
YOR089C	0.77657	1.07702	0.30045	45	-1.99	-2.35	0.3	0.604446
YNL007C	1.35985	1.48922	0.12938	122	7.72	6.73	-0.04	0.526716
YKL145W	0.51979	0.4749	-0.0449	63	4.45	-14.88	0.34	NA
YLR390W-A	1.45333	1.3068	-0.14653	40	29.53	19.24	0.69	0.430156
YJR094W-A	0.76158	0.68531	-0.07627	40	-45.17	-0.39	-1.08	0.813024
YER026C	0.38136	0.23922	-0.14214	68	-2.85	26.85	-0.05	0.817809
YMR027W	0.22072	0.37675	0.15602	69	3.16	9.12	0.24	0.569643
YPR161C	-0.42239	-0.46675	-0.04435	64	7.87	35.18	0.26	0.49161
YPL212C	0.11044	0.19111	0.08068	40	-9.48	9.03	-0.21	0.604037
YFR005C	-0.88253	-0.62796	0.25457	48	2.38	-0.41	0.05	0.437033
YDR165W	0.19511	0.13946	-0.05564	188	1.69	11.94	0	0.429076
YHL021C	0.80957	0.90427	0.0947	39	-25.25	-6.97	-0.33	0.461204
YMR122W-A	1.70488	1.55399	-0.15089	46	23.64	48.2	0.09	0.778689
YDR032C	1.58979	1.56049	-0.0293	57	-5.16	-6.19	0.02	0.531638
YHR094C	0.35511	0.21963	-0.13548	55	-12.23	15.51	-0.21	0.538761
YNL074C	0.44562	0.41204	-0.03358	39	3.26	1.64	0.4	0.249007
YHR098C	-0.44473	-0.44202	0.0027	76	11.76	20.45	0.43	0.657482
YMR139W	0.01823	0.13231	0.11408	213	15.21	9.32	0.45	0.335113
YDR143C	-0.39876	-0.59897	-0.20021	46	-4.06	5.58	0.16	0.443257
YLR197W	0.31574	0.30149	-0.01425	39	-8.52	5.73	0.62	0.702963
YOL048C	-0.92024	-1.09714	-0.1769	67	-16.23	-17.17	0.27	0.358631
YDR462W	1.57881	1.33712	-0.24169	39	0.31	-2.21	0.15	0.308877
YBR172C	0.07024	-0.15988	-0.23012	98	16.04	9.7	0.34	0.560235
YDR060W	-0.27349	-0.33881	-0.06532	51	-4.7	4.73	-0.11	0.622471
YGL077C	-0.12335	-0.37521	-0.25186	45	-17.7	8.7	-0.13	0.482814
YPR023C	-0.6058	-0.29464	0.31116	42	-0.29	1.78	0.18	0.474697
YMR146C	0.50601	0.34341	-0.1626	40	20.31	22.91	0.53	0.280593
YDL205C	-0.15264	-0.33629	-0.18366	202	10.36	18.39	0.2	0.298082
YEL040W	0.16806	-0.07633	-0.24439	39	-38.41	-4.4	-0.48	0.677167
YNL149C	0.12784	0.46418	0.33633	40	-13.11	15.5	-0.06	0.67749
YML012W	0.44393	0.57946	0.13553	48	-0.55	11.78	-0.41	0.345097
YPR181C	0.06161	0.17672	0.1151	167	2.95	-4.46	0.15	0.359885
YFL039C	0.66387	0.70527	0.0414	129	-9.76	29.28	0	0.703826
YBR077C	0.26682	0.25849	-0.00834	123	2.09	-14.24	-0.02	0.401103
YBR106W	0.78645	0.68317	-0.10328	46	28.67	21.83	1.12	0.390568
YOR187W	0.2245	0.19156	-0.03295	75	25.22	61.16	0.28	0.840053
YIL065C	1.36534	1.15453	-0.21082	52	18.12	13.27	0.39	0.407573
YJR118C	0.46181	0.55569	0.09388	64	5.45	-17.74	0.24	0.69557
YDR329C	-0.20873	-0.48223	-0.2735	42	9.53	6.73	0.2	0.484778
YLR020C	-1.05079	-0.98667	0.06413	51	-8.59	-8.92	0.12	0.425157
YNL084C	0.74941	1.04625	0.29684	56	6.09	-7.11	0.11	0.580178
YAR007C	0.68457	0.86653	0.18195	66	-2.49	0.01	0.13	0.376046
YOR125C	0.38175	0.217	-0.16475	51	1.04	4.24	-0.14	0.445928
YJL061W	-0.52047	-0.64468	-0.12421	65	6.97	0.72	0.24	0.402345
YHR021C	1.58687	1.68248	0.0956	42	2.31	9.62	-0.24	0.518044
YBR073W	-0.73341	-0.63075	0.10267	76	5.15	11.49	0.03	NA
YMR058W	0.28041	0.1159	-0.16452	44	-1.41	23.78	1.04	0.492339
YPL083C	-1.09413	-0.85825	0.23588	42	0.91	-9.77	0.04	0.359414
YPL023C	-0.25989	-0.23295	0.02694	120	-1.71	6.69	0.02	0.635134
YKL165C	-0.31471	-0.37873	-0.06402	43	2.79	-0.36	0.02	0.584975
YPL240C	0.94995	1.00702	0.05707	39	17.83	31.38	0.49	0.621056
YIR035C	0.45733	0.61639	0.15907	42	0.85	-4.64	0.24	0.665916
YGR117C	-0.03661	-0.40345	-0.36684	169	0.36	13.1	-0.03	0.622872
YKR001C	0.62559	0.59794	-0.02765	55	-2.27	11.15	-0.12	0.460549
YOR264W	0.32148	0.39512	0.07363	60	6.69	0.32	0.39	0.487779
YJL060W	0.11702	0.32061	0.20359	62	3.89	17.07	0.07	0.324425
YGR281W	-1.21461	-1.22513	-0.01052	229	9.94	13.77	0.09	0.401338
YDR190C	0.16773	0.29465	0.12692	50	13.77	17.23	0.17	0.500652
YFR004W	0.91379	0.81007	-0.10372	38	10.38	8.01	0.23	0.500719
YDL085C-A	0.51702	1.03051	0.51349	62	-4.23	11.3	0	0.834193
YER133W	0.61409	0.83198	0.21789	61	15.82	14.57	0.51	0.529958
YMR006C	0.02964	-0.14966	-0.1793	81	10.47	2.94	0.48	0.263226
YML010W	0.17695	0.16692	-0.01003	42	-1.31	-15.32	0.16	0.495801
YOL122C	0.01207	0.0954	0.08333	87	-3.47	29.69	0.08	0.545508
YDR260C	0.72035	0.27286	-0.44749	39	2.2	-7.49	0.42	0.36908
YLR438C-A	1.38164	1.56852	0.18688	51	5.55	-4.13	0.6	0.446674
YPL106C	0.81776	0.97722	0.15945	38	1	46.58	-0.2	0.618245
YJR014W	1.16411	1.22697	0.06286	39	-9.67	-12.12	0.49	0.544623
YDR353W	0.77129	0.70185	-0.06945	40	-9.52	-37.76	1.11	0.722621
YGR254W	1.616	1.72785	0.11184	40	14.28	21.76	1.06	0.887908
YNL307C	-0.1354	-0.19283	-0.05743	168	-1.34	-6.35	0.58	0.471139
YOR311C	0.30676	0.14768	-0.15907	52	-3.03	-6.68	0.64	0.409623
YLR207W	-0.6006	-1.13591	-0.53531	45	3.02	6.69	0.33	0.419143
YJL145W	0.49341	0.81532	0.32191	41	-1.03	9.64	0.07	0.48787
YNL137C	-0.01395	0.36014	0.37409	96	4.55	3.81	0.02	0.415161
YEL029C	-0.18245	0.11482	0.29727	67	5.04	16.24	-0.01	0.801589
YDR206W	-1.35642	-1.05683	0.29959	153	2.28	0	0.01	0.402482
YML069W	0.66383	0.77064	0.10681	66	-2.54	3.03	-0.1	0.425023
YHR143W-A	1.14927	1.22334	0.07407	40	-16.01	9.44	-1	0.854404
YEL025C	-3.26064	-3.41935	-0.15871	38	1.76	2.41	-0.02	NA
YGR099W	-1.11704	-0.89761	0.21943	42	-13.26	-7.99	0.31	NA
YDL123W	0.6932	0.52004	-0.17316	52	7.73	8.26	0.47	0.406759
YLR361C	-0.65103	-0.72645	-0.07542	53	-3.84	-0.82	-0.04	0.403925
YIR034C	0.9364	1.00897	0.07257	37	3.56	11.66	-0.01	0.928622
YJR005W	-0.56611	-0.99025	-0.42415	48	3.48	5.72	0.01	0.252924
YBR004C	-0.72783	-0.48174	0.24609	55	-5.41	-2.24	-0.01	0.599287
YLR324W	0.02348	-0.07669	-0.10017	70	13.42	21.76	0.19	0.368313
YER020W	0.04494	0.26033	0.21539	107	1.57	3.58	0.14	0.4817
YJL002C	0.08884	0.01939	-0.06945	42	10.13	16.57	0.5	0.515093
YLR138W	-1.09485	-1.41103	-0.31618	165	-16.64	2.57	-0.07	0.517188
YML088W	-0.72075	-0.77006	-0.04931	39	0.91	0.45	0.15	0.31793
YJL198W	-0.57149	-0.65671	-0.08522	164	2.19	0.01	0.08	0.272009
YDR434W	0.05656	-0.28921	-0.34577	98	18.07	0.37	0.21	0.56837
YDR151C	0.16775	0.219	0.05125	124	16.51	7.63	0.27	0.322294
YCL011C	0.06187	0.11861	0.05674	47	-44.93	-34.36	0.22	0.477433
YGL215W	-1.77155	-1.67893	0.09261	465	20.81	21.2	0.19	0.779726
YLR287C-A	1.03901	1.20703	0.16803	42	-38.49	8.64	-0.29	0.541799
YHR191C	0.50591	0.41064	-0.09527	43	-0.78	9.3	0.13	0.616555
YJL217W	0.98359	0.78529	-0.19831	81	-5.8	2.9	-0.02	0.551278
YMR129W	-0.71429	-0.98154	-0.26725	59	-0.78	5.72	0.12	NA
YGR061C	-0.53248	-0.56023	-0.02776	125	-3.11	16.6	0.07	NA
YOR045W	0.95367	1.50412	0.55045	37	-0.23	8.99	0.5	0.548165
YCL045C	0.35507	0.2878	-0.06726	43	20.57	-8.63	0.49	0.408455
YMR314W	0.65225	0.61788	-0.03437	57	13.45	18.06	0.5	0.516788
YOR230W	0.5491	0.59193	0.04283	38	2.71	3.13	0.37	0.685585
YOL109W	1.24459	1.60494	0.36035	40	9.85	26.05	0.06	0.80107
YOL086C	1.10165	0.92208	-0.17957	40	20.76	-3.83	0.57	0.704275
YKL096W-A	1.63901	1.38082	-0.25819	50	-4.93	26.79	0.67	0.613731
YOL013W-A	0.54167	-0.29051	-0.83217	36	0	0	0	NA
YGL047W	0.39189	0.27539	-0.1165	51	5.18	-2.81	0.2	0.639893
YPR024W	-0.35917	-0.60982	-0.25065	112	3.12	-15.34	0.43	0.303954
YOL063C	-1.7132	-1.60657	0.10663	36	1.66	-1.15	0.08	0.503003
YKR082W	-0.47764	-0.79589	-0.31826	50	2.42	0.75	-0.02	NA
YJL044C	-1.05086	-0.64739	0.40347	46	17.71	-0.09	0.55	0.408939
YGL017W	-0.35801	-0.25096	0.10705	36	-26.98	0.22	-0.89	0.546326
YBL068W	0.26594	0.27971	0.01377	55	3.77	-1.63	0.05	0.720829
YNL248C	0.83125	0.71965	-0.1116	41	-11.59	-4.39	0.1	0.48725
YLL019C	-1.63262	-1.26199	0.37063	458	7.21	4.84	0.05	0.433714
YCR077C	0.46868	0.5448	0.07612	44	5.22	9.02	0.16	0.505811
YOR067C	-0.22243	-0.11062	0.11181	36	2.53	15.01	0.75	0.390049
YPR034W	-0.05259	-0.14675	-0.09416	65	7.03	10.96	0.03	0.538968
YOR288C	0.26691	0.80889	0.54198	36	-10.89	-8.44	-0.21	0.465177
YJL137C	-0.36908	-0.04499	0.32409	57	-1.36	-4.61	-0.02	0.353129
YDR140W	-0.56354	-0.27576	0.28779	87	4.77	7.63	-0.01	0.300137
YBR053C	0.64691	0.49933	-0.14758	53	-9.23	-7.39	0.09	0.482039
YDR294C	0.00452	-0.31624	-0.32077	38	10.31	-1.02	0.05	0.547256
YAL032C	-0.00231	0.17227	0.17459	36	1.95	-2.38	0.14	0.628811
YPL273W	-0.25246	-0.4248	-0.17234	107	19.73	19.68	-0.12	0.698287
YHR013C	0.74515	0.78506	0.03991	44	-3.21	-9.22	-0.05	0.647841
YOR280C	0.78883	0.53342	-0.25541	42	-9.26	-19.12	0.12	0.419897
YDL052C	0.38897	0.27509	-0.11388	36	-5.45	6.74	0.03	0.622471
YNL111C	0.99964	1.18904	0.1894	36	-24.7	-1.95	-0.28	0.641192
YGL228W	0.10113	0.31754	0.2164	42	5.51	20.4	-0.02	0.494596
YKL126W	-0.15238	-0.16332	-0.01094	191	8.92	-6.53	0.22	0.533
YGL014W	-0.85987	-1.1035	-0.24363	382	20.92	4.09	0.2	NA
YJR064W	-0.03338	-0.03796	-0.00457	49	0.19	65.48	-0.26	0.676994
YFL004W	-0.22461	-0.23201	-0.0074	145	-16.41	-20.41	0.09	0.319214
YLR206W	-0.15031	-0.08433	0.06599	106	9.44	16.49	0.2	0.646173
YKL175W	0.02568	-0.31328	-0.33896	44	-6.2	-10.38	0.51	0.494545
YOR201C	-0.85438	-1.11806	-0.26368	36	3.53	2.04	-0.02	0.34485
YOR065W	0.69811	0.49093	-0.20717	290	7.33	10.03	0.17	0.52015
YGR158C	0.65376	0.92776	0.274	55	7.69	2.3	0.24	0.481813
YKL210W	0.45981	0.28701	-0.1728	41	-8.08	-14.03	0.54	0.334443
YDR208W	-0.81665	-0.74614	0.07051	38	12.31	6.4	0.43	0.37512
YEL065W	-0.31457	-0.44236	-0.12779	133	0.08	9.59	-0.08	0.519003
YDR012W	0.99785	0.93141	-0.06644	36	12.85	48.48	0.81	0.66302
YIL121W	-0.91457	-1.07617	-0.16161	47	0.38	5.72	-0.05	NA
YPL028W	0.59829	0.64815	0.04985	36	5.63	14.14	0.85	0.806408
YDR399W	0.50215	0.79099	0.28884	57	-2.8	11.7	-0.13	0.54233
YLR043C	1.14019	1.26341	0.12321	35	-29.64	-25.67	-1.17	0.653848
YDR333C	-0.26795	-0.43401	-0.16606	36	7.62	-10.74	0.33	0.357578
YNL035C	-0.13492	0.07127	0.20619	58	-1	4.87	-0.09	0.4065
YOR004W	0.29396	-0.02275	-0.31671	51	4.29	-0.81	-0.1	0.474664
YHR003C	-0.06383	-0.15527	-0.09144	63	-0.33	1.83	0.06	0.500018
YHR073W	-1.12731	-1.38443	-0.25712	81	11.14	-3.56	0.26	NA
YOR086C	-0.78023	-0.81723	-0.037	182	6.26	1.56	0.1	0.554499
YGL211W	-1.20484	-0.71873	0.48611	36	-1.3	5.17	0.41	0.403657
YML023C	-1.77767	-2.14062	-0.36296	48	15.84	-2.91	0.34	0.304182
YMR220W	-0.4846	-0.47331	0.01129	89	4.19	12.71	0.04	0.511563
YDR079C-A	0.31348	0.38696	0.07348	58	-2.13	23.74	-0.06	0.897642
YLR410W	-0.10733	-0.25522	-0.14789	47	4.84	6.1	0.14	NA
YGR206W	0.71095	1.26466	0.55371	35	-2.23	3.3	0.01	0.604446
YBL047C	0.221	0.26379	0.04279	154	4.63	3.53	0.04	0.343008
YOL008W	0.63363	0.34167	-0.29196	35	-9.06	0.75	0.07	0.360323
YFR003C	1.06154	1.18693	0.12539	43	-9.56	6.52	0.1	0.453707
YPL059W	1.00618	1.113	0.10682	63	10.91	11.2	0.34	0.48689
YNL024C-A	1.08501	1.4575	0.37249	72	9.26	1.88	0.18	0.503172
YGR233C	-0.9898	-1.27036	-0.28057	96	7.75	9.59	0.2	NA
YNR001C	0.4967	0.50799	0.0113	105	19.6	4	0.35	0.52687
YKL019W	-0.40578	-0.37016	0.03562	70	12.21	4.93	0.05	0.449749
YDR508C	-0.12793	-0.22587	-0.09793	131	14.54	13.58	0.17	0.385363
YJL097W	1.0113	0.7264	-0.2849	45	-6.56	-10.92	0.68	0.578239
YNL251C	0.31503	0.6146	0.29957	259	12.83	3.01	0.29	0.409894
YIL069C	1.43105	1.55308	0.12204	59	12.92	8.57	0.31	0.708066
YPR169W	-0.79956	-0.8347	-0.03514	58	19.31	-2.6	0.46	0.467235
YBR233W-A	0.71294	0.9925	0.27956	40	-3.38	13.05	0.11	0.32721
YPL032C	-0.63013	-0.48593	0.1442	186	13.48	10.75	0.28	0.40248
YNL099C	0.26993	0.077	-0.19293	35	-2.54	-11.6	0.3	0.413013
YIL051C	1.21446	1.31306	0.0986	35	-29.63	11.34	-0.11	0.6743
YML130C	0.27283	0.39459	0.12176	73	10.67	5.15	0.34	0.502485
YOL052C-A	1.78357	1.82774	0.04418	35	-3.41	4.1	0.08	0.517349
YNL287W	-0.16097	0.0185	0.17947	191	41.25	11.24	0.58	0.74409
YOL057W	0.10977	0.13304	0.02327	56	-9.67	5.63	0.04	0.515225
YOL139C	0.99782	0.92528	-0.07254	64	3.89	22.79	0.14	0.66544
YGR147C	-0.23233	-0.36874	-0.1364	56	-6.13	-5.72	-0.11	0.202392
YKL057C	-0.81821	-1.00203	-0.18382	35	5.62	2.98	0.5	0.442342
YLR003C	0.40964	0.22914	-0.1805	39	7.55	9.85	0.7	0.631725
YNL161W	-0.12555	0.03793	0.16348	174	8.81	9.95	0.08	0.519862
YDR410C	-0.01516	0.28402	0.29918	35	-28.94	-34.42	-0.13	0.412743
YMR309C	-0.23014	0.01226	0.2424	65	14.22	-1.01	0.76	0.577854
YNR013C	-0.18934	-0.24043	-0.05109	36	-10.49	-6.74	0.21	0.339292
YFR050C	0.51482	0.70764	0.19283	41	6.8	21.84	0.6	0.366496
YNL151C	-0.03828	-0.17207	-0.13379	50	3.11	-0.27	0.26	0.633796
YHR108W	0.2614	0.41673	0.15534	59	5.84	7.69	0.23	0.427165
YIL074C	0.29573	0.47658	0.18085	115	14.27	32.91	0.04	0.646605
YGL253W	0.79637	0.85447	0.0581	35	3.77	34.99	0.02	0.711612
YMR071C	0.71305	0.57685	-0.1362	45	-0.81	8.6	-0.06	0.831316
YML074C	0.6421	0.63973	-0.00236	42	20.25	38.53	0.65	0.664477
YIL157C	0.62437	0.74422	0.11984	63	5.16	4.93	0.04	NA
YPR088C	0.12823	0.20558	0.07735	34	21.68	22.38	0.71	0.509133
YOR051C	0.40367	0.46282	0.05915	53	6.59	4.26	-0.02	0.806637
YAL013W	0.37488	0.3096	-0.06528	34	6.34	4.24	0.29	0.252092
YHR058C	0.29184	0.62318	0.33134	37	0.96	-6.74	-0.03	0.433623
YBR273C	0.58909	0.62812	0.03902	34	3.94	-3.49	0.22	0.428583
YBR160W	0.75304	0.94833	0.19529	62	6.1	-1.95	0.32	0.357578
YNL222W	0.63459	0.46258	-0.172	39	-12.37	-10.83	-0.45	0.798357
YHR187W	0.54596	0.35707	-0.18889	37	17.23	7.45	0.44	0.523071
YKL047W	0.14502	-0.09056	-0.23559	57	4.48	4.07	0.05	0.417266
YLR220W	0.11575	0.11356	-0.00218	120	8.9	-23.81	0.31	0.44725
YDL165W	1.20248	0.93014	-0.27234	51	2.24	-3.85	0.27	0.524806
YPR140W	-0.66469	-0.72998	-0.06529	49	6.19	-6.05	0.17	0.52505
YDR234W	-0.0726	-0.05396	0.01865	252	15.9	19.54	0.02	0.49271
YOR138C	-0.24696	-0.2208	0.02617	34	-32.87	4.48	-0.8	0.369949
YCR002C	0.56575	0.65644	0.09069	34	-4.36	9.66	0.24	0.48169
YGL056C	0.44192	0.26654	-0.17539	48	13.64	12.53	0.46	0.423388
YPR080W	0.80344	0.92191	0.11846	34	-17.78	-6.14	0.82	0.708191
YHR163W	0.17819	-0.04515	-0.22333	46	-11.69	-2.22	0.11	0.360594
YIL011W	0.99629	0.56025	-0.43604	34	11.12	2.46	0.57	0.883892
YDR387C	-2.08853	-1.48858	0.59994	138	15.2	-6.05	0.25	0.379083
YOL038W	0.76137	0.61277	-0.1486	34	7.13	3.58	0.46	0.609884
YNL016W	0.8445	1.02977	0.18528	154	16.91	17.5	0.14	0.478316
YPR067W	-0.87982	-0.45263	0.4272	49	12.53	-3.13	0.41	0.236226
YKR093W	0.60646	0.24558	-0.36088	75	18.37	25.44	0.04	0.398346
YLR120C	0.26927	0.07924	-0.19003	151	9.3	-20.68	0.22	0.31377
YER001W	-0.08514	0.07378	0.15892	172	13.34	-26.28	0.08	0.36338
YLL026W	0.74918	0.64289	-0.10629	41	19.74	14.41	0.53	0.309149
YPL111W	1.44889	1.20591	-0.24298	48	2.35	24.49	-0.21	0.550241
YLR216C	1.011	1.1247	0.1137	34	-19.41	-16.09	0.81	0.825842
YAL014C	0.06547	-0.36912	-0.43459	45	9.19	3.63	0.73	0.313212
YFL045C	1.02649	1.23981	0.21332	88	25.82	23.57	0.7	0.58668
YDL045W-A	0.70308	0.8367	0.13361	34	3.04	14.36	0.01	0.432108
YFR028C	-0.29901	-0.0605	0.23851	34	-32.69	-1.94	-0.71	0.707378
YFL031W	-4.37669	-3.73924	0.63745	69	-17.02	-51.62	0.7	NA
YLR044C	0.59058	0.50274	-0.08784	33	2.89	7.22	0.37	0.885133
YMR123W	0.73398	1.16296	0.42899	33	-21.97	-6.16	-0.33	0.65165
YNR049C	0.97224	0.47534	-0.4969	40	-0.27	0.7	0.06	0.230606
YOR246C	-0.90508	-0.8976	0.00748	66	18.28	18.81	0.51	0.368656
YKR057W	1.21195	1.44892	0.23697	34	-5.26	7.59	0.2	0.653084
YDR498C	-0.27797	-0.44597	-0.168	33	-3.47	-10.22	-0.14	0.331357
YBR115C	-0.24674	-0.31329	-0.06655	120	19.05	6.99	0.19	NA
YGL080W	1.32147	1.41613	0.09466	63	4.89	5.32	0.09	0.688277
YOR149C	-0.86674	-1.44793	-0.58119	45	-1.83	9.86	-0.12	0.166556
YAL026C	-0.96923	-1.1007	-0.13147	88	9.12	6.24	0	0.461011
YJR137C	-1.29643	-1.25724	0.03919	82	-0.78	13.09	-0.22	NA
YKL077W	0.31667	0.28817	-0.0285	54	-5.82	-6.14	0.28	0.417569
YDL108W	0.02249	0.21852	0.19603	50	1.06	-2.02	0.12	0.309149
YML131W	0.91022	0.61943	-0.29078	34	13.67	-11.67	0.44	0.417873
YJL124C	0.33788	0.61494	0.27706	159	14.1	19.06	0.34	0.908212
YIR009W	1.21103	0.6835	-0.52753	51	5.76	-0.69	0.21	0.578906
YGR116W	-0.40422	-0.4895	-0.08529	54	0.28	2.41	-0.26	0.258071
YER163C	-0.35697	-0.12746	0.22952	37	-18.9	-9.6	0.05	0.429855
YPL036W	0.69952	1.11374	0.41422	97	-4.74	-2.23	0.02	NA
YBR246W	-0.62013	-0.81394	-0.19381	38	2.21	-2.49	0.61	0.345914
YCL025C	0.0618	-0.07131	-0.13312	184	10.17	7.66	-0.07	0.466518
YPR106W	0.10524	-0.2813	-0.38654	92	1.74	2.7	0.03	0.28816
YOL027C	0.39501	0.52911	0.1341	43	-2.27	12.91	-0.15	0.486845
YBR185C	0.33171	0.66931	0.3376	35	-2.12	-4.95	0.17	0.422351
YOR317W	0.53041	0.54073	0.01031	164	18.49	33.62	0.17	0.614753
YGL091C	0.71876	0.71038	-0.00839	53	8.31	6.19	0.55	0.598686
YOL082W	-0.31311	-0.20206	0.11105	148	4.77	2.79	0.15	0.250937
YLR052W	-0.28998	0.3634	0.65339	33	-12.88	2.49	-0.2	0.506368
YMR197C	0.80986	0.71005	-0.0998	33	1.65	-3.13	0.28	0.397123
YGR024C	-0.86164	-0.73069	0.13095	33	-9.73	1	-0.25	0.322103
YMR205C	0.41973	0.3548	-0.06493	66	20.37	10.65	0.35	0.568647
YPL211W	0.28248	0.53147	0.24899	34	0.31	-16.26	0.41	0.503918
YHR066W	0.49704	0.5771	0.08006	34	1.48	-1.87	0.03	0.606781
YHR200W	1.04751	0.93108	-0.11643	33	-20.93	-24.65	0.2	0.450389
YNR046W	1.25001	1.3706	0.1206	39	-5.05	-7.23	0.53	0.409513
YML110C	0.32338	0.0143	-0.30908	39	2.01	18.5	-0.67	0.428248
YBR146W	0.00186	-0.03478	-0.03664	63	9.23	1.08	0.3	0.380009
YBR127C	0.46337	0.49832	0.03496	47	13.17	36.82	0.24	0.465072
YIR006C	0.06087	0.12381	0.06295	49	18.25	1.87	0.45	NA
YLR146C	-0.26554	-0.35635	-0.09081	34	15.39	7.29	0.64	0.511054
YOR272W	0.51353	0.33364	-0.17989	49	17.89	-1.57	0.53	0.533655
YDR307W	0.07559	-0.00694	-0.08253	69	3.62	12.17	-0.06	0.437392
YAL022C	-0.11257	-0.29036	-0.17779	35	-4.66	17.05	-0.45	0.700119
YDR483W	0.42019	0.19379	-0.2264	68	20.48	-6.51	0.23	0.434189
YKL006C-A	0.634	0.58523	-0.04877	32	-5.58	-0.17	0.09	0.506206
YNR018W	0.66756	0.64185	-0.02571	46	11.79	-1.09	0.43	0.363263
YPL227C	-0.45679	0.02913	0.48592	138	18.28	-3.53	0.15	0.635329
YLR078C	0.23161	0.01786	-0.21374	55	8.33	7.92	0.01	0.233685
YOR215C	1.21571	1.34802	0.13231	52	-1.57	2.81	0.13	0.543943
YDR135C	-0.71449	-0.69385	0.02064	37	-1	4.86	0.43	NA
YIL003W	-0.43547	0.14622	0.58169	32	5.31	-7.12	0.31	0.362771
YCL016C	-0.10461	-0.14793	-0.04332	34	2.58	6.71	0.13	0.40885
YLR310C	-1.4905	-1.69888	-0.20839	88	0.77	3.34	-0.01	NA
YNL003C	-0.48844	-0.45401	0.03442	41	-4.51	3.86	-0.17	0.35234
YLR088W	-0.10515	0.06203	0.16718	42	9.45	16.08	-0.01	0.52421
YDR530C	-0.16453	-0.025	0.13953	33	-2.95	-3.77	0.06	NA
YIL158W	-0.76752	-0.66721	0.10031	32	-18.91	-0.06	-0.37	0.55619
YDR152W	0.13734	0.15876	0.02142	32	5.51	21.5	0.28	0.487804
YHL025W	-0.35268	-0.18673	0.16594	49	2.14	-8.02	0.02	0.676589
YDR361C	0.33689	0.58377	0.24688	34	10.72	2.74	0.46	0.692361
YLR399C	-0.24642	-0.23825	0.00817	32	-0.83	10.31	0.17	0.441272
YMR209C	-0.70611	-0.7398	-0.03369	37	-1.91	7.31	0	0.340436
YOL102C	0.37512	0.79893	0.42381	46	-1.75	-17.17	0.17	NA
YDR245W	-0.50937	-0.47446	0.03491	58	5.23	26.74	-0.12	0.686185
YLR084C	-1.18226	-1.34359	-0.16133	32	-5.84	2.13	0.22	NA
YML081C-A	1.40351	1.5546	0.15108	49	-0.18	5.29	-0.38	0.335833
YER134C	0.84204	0.6363	-0.20574	38	3.74	16.77	0.33	0.49871
YLR312W-A	0.45813	0.62892	0.17079	32	0.37	-6.91	0.22	0.459927
YHR188C	-0.21118	-0.47007	-0.25889	42	36.88	38.84	0.8	0.358257
YOR382W	-0.0102	-0.69102	-0.68082	41	-3.79	-1.55	0.02	0.540064
YPR166C	1.55332	1.24439	-0.30893	39	2.41	3.29	-0.11	0.39386
YDR519W	0.74123	0.85706	0.11584	48	-2.52	-11.24	0.55	0.268199
YMR072W	1.29273	1.43915	0.14641	32	-10.97	-6.34	0.16	0.417965
YML028W	1.52024	1.53659	0.01635	32	-1.27	1.82	0.53	0.536556
YHR064C	0.43597	0.46668	0.03071	32	-53.54	25.99	-0.26	0.573007
YNR017W	0.47716	0.26793	-0.20923	210	23.23	35.01	0.43	0.544791
YNL265C	0.8155	0.82629	0.01079	64	3.07	13.44	0.07	0.880664
YNL056W	-0.86502	-0.40571	0.45931	77	-1.45	-28.67	0.05	0.283284
YLR450W	-0.56764	-0.92295	-0.35531	157	6.14	1.85	0.11	0.428455
YBR101C	0.48945	0.94268	0.45323	39	-1.67	-4.71	0.12	0.485374
YJR088C	0.21579	0.29814	0.08235	31	14.59	2.17	0.6	0.565272
YJL014W	0.27719	0.49333	0.21614	33	-0.47	-9.63	0.22	0.480193
YJR040W	-0.76736	-0.75205	0.01531	44	6.51	10.11	0.38	0.424868
YFL017W-A	1.18656	1.40892	0.22236	33	11.77	-3.88	0.39	0.585923
YNL256W	-0.96928	-1.07655	-0.10727	87	7.06	8.87	0.01	0.323979
YKR092C	0.9048	0.86394	-0.04086	31	-2.91	1.26	0.36	0.691354
YJL081C	-0.31947	-0.52358	-0.20411	31	-1.62	1.05	-0.04	0.548216
YLR421C	1.22749	1.37671	0.14922	31	-20.89	-7.64	-0.52	0.25069
YNL305C	0.8937	0.53085	-0.36285	33	1.76	14.92	0.09	0.508667
YJR068W	0.0796	0.29851	0.21891	31	5.79	-6.97	0.16	0.45439
YNL281W	0.73116	0.85799	0.12683	31	-27.2	-15.69	-0.33	0.651389
YDR422C	-0.56091	-0.68792	-0.12701	179	7.44	-0.99	0.02	0.354161
YGR055W	0.01835	-0.05676	-0.07511	35	-14.8	-4.56	0.05	0.417576
YKL214C	0.59813	0.64469	0.04656	57	-2.82	-6.58	0.37	0.387328
YGL195W	-0.68257	-0.6024	0.08017	31	-4.06	-8.68	0.61	NA
YJR080C	0.04529	0.02891	-0.01638	37	-12.94	-17.3	0.31	0.404943
YCL005W	-0.75232	-0.72109	0.03123	44	11.74	23.09	0.21	0.478622
YBR142W	-0.02336	-0.0408	-0.01743	44	-1.34	-7.17	0.29	0.526048
YDR084C	0.78739	1.10695	0.31956	56	2.77	15.09	0.21	0.460817
YCL040W	0.89252	0.78133	-0.11119	32	36.01	22.5	1.17	NA
YBL009W	-0.41897	-0.26367	0.15531	35	1.49	2.82	-0.1	0.501387
YBR287W	0.05636	-0.35882	-0.41518	38	12.62	2.46	0.47	0.41374
YMR297W	0.3909	0.35124	-0.03966	79	7.71	-1.21	0.43	0.32203
YDR531W	-0.40653	-0.23602	0.17051	44	-0.62	-3.8	0.2	0.431622
YLR190W	-0.24318	-0.22453	0.01865	51	6.32	5.81	0.12	0.750338
YNL330C	-0.25384	-0.51603	-0.26219	53	-6.01	-23.83	0.82	0.272601
YIL078W	0.59878	0.6515	0.05271	39	1.47	-13.81	0.24	0.381424
YMR266W	-0.48086	-0.46317	0.01769	72	0	1.14	0.11	0.64003
YPL015C	-1.01915	-1.11153	-0.09238	43	30.6	-6.84	1.21	0.404986
YER019C-A	0.98525	0.8241	-0.16116	62	-8.89	3.61	-0.81	0.58182
YER025W	0.62483	0.68938	0.06455	46	5.73	4.46	0.44	0.458913
YNL115C	0.26403	0.10841	-0.15562	34	1.33	0.24	0.14	0.268825
YBL058W	0.69356	0.69975	0.00619	30	3.38	0.94	0.33	0.328612
YMR033W	-0.11689	0.1393	0.25619	30	5.71	16.54	0.23	0.539229
YOL066C	-0.40882	-0.61245	-0.20363	30	-1.63	2.9	0.06	0.570187
YFR030W	-1.40415	-1.56032	-0.15617	56	9.98	10.16	0.29	0.469765
YIL070C	1.13292	0.96052	-0.17241	34	-10.85	-3.18	0.14	0.52507
YOL147C	1.25088	0.94874	-0.30214	74	4.99	4.74	0.13	0.495223
YBR262C	0.41855	0.56934	0.15079	31	-19.89	-32.3	0.39	0.451438
YDR284C	0.57779	0.4854	-0.09239	267	13.09	8.73	0.14	0.574377
YHR167W	0.82585	1.2238	0.39795	45	-15.32	-17.54	0.13	0.347201
YER168C	0.28038	0.31538	0.035	47	2.71	-8.27	0.1	NA
YBR005W	0.17984	0.02053	-0.15931	36	-6.11	-2.66	-0.08	0.374326
YLL001W	0.06037	0.447	0.38663	30	-5.07	12.26	-0.08	0.671996
YDR249C	-1.33881	-1.49641	-0.1576	30	4.1	1.35	0.13	0.318253
YNL191W	-0.38854	-0.16638	0.22216	46	7.14	1.43	0.24	0.341517
YEL052W	-0.37168	-0.53932	-0.16764	89	7.62	1.75	0.15	0.447138
YOL030W	0.35691	0.25455	-0.10236	77	13.48	6.36	0.43	0.402105
YOL129W	0.51274	0.64938	0.13664	31	4.71	0.88	0.48	0.409408
YER057C	1.58585	1.26032	-0.32554	30	-25.91	14.29	-0.69	0.394751
YML085C	0.12567	0.22773	0.10205	32	5.19	1.58	0.79	0.496098
YCL034W	0.58881	0.39757	-0.19124	32	-2.7	8.56	0.04	0.364709
YGL225W	0.34272	0.2815	-0.06121	43	3.98	-9.73	0.84	0.401476
YKL216W	1.03145	0.99264	-0.03881	31	11.89	11.23	0.18	0.593777
YNR032C-A	0.25181	1.16008	0.90827	30	-17.62	-3.68	-0.23	0.506787
YML019W	-0.31322	-0.45307	-0.13984	33	11.16	2.09	0.47	0.454879
YIL022W	0.2932	0.131	-0.1622	112	53.53	17.1	0.74	0.190967
YLR259C	0.85008	1.0106	0.16052	37	16.38	42.93	0.29	0.569963
YBL102W	0.14383	0.10648	-0.03735	91	16.43	12.72	0.32	0.312465
YOR175C	-0.24209	-0.49642	-0.25432	76	53.56	20.28	0.96	0.509219
YMR178W	0.02998	0.28765	0.25767	30	-7	-1.08	-0.02	0.368264
YKL190W	0.27345	0.77239	0.49894	34	-4.65	-6.45	-0.3	0.611201
YDR262W	-0.05001	0.01618	0.06619	39	-6.83	0.72	-0.14	0.361457
YMR292W	-0.32448	0.03847	0.36295	47	8.13	-9.68	0.21	0.397539
YLR204W	0.16638	0.06784	-0.09853	32	4.59	-9.7	0.53	0.531545
YHR144C	-0.47285	-0.30269	0.17016	36	6.75	4.16	-0.2	0.357469
YPL096C-A	-0.20672	0.10603	0.31275	30	-7.26	-2.48	-0.08	0.175401
YJL012C	0.00692	0.08281	0.07589	33	-15.41	-0.78	-0.37	0.336565
YPL172C	-0.69759	-1.28414	-0.58655	36	-2.28	-4.42	0.03	0.338907
YNL079C	1.3259	1.44025	0.11435	32	-8.65	14.97	0.04	0.559625
YOL124C	0.15164	0.4119	0.26026	34	2.62	-2.52	-0.1	0.250744
YBR265W	-0.02854	-0.01024	0.0183	56	-10.74	-10.68	-0.17	0.275568
YPR167C	-0.6195	-0.39469	0.22481	50	4.82	0.55	0.17	NA
YLR276C	-0.0855	0.13594	0.22143	109	18.27	14.57	0.2	0.587079
YJL184W	0.74634	0.54251	-0.20383	30	11.88	17.85	0.43	0.356097
YNL217W	-0.78179	-0.51224	0.26955	30	-9.07	-15.08	-0.08	0.660243
YPL006W	-0.70945	-0.94074	-0.23129	57	3.83	1.32	0.25	0.559284
YDR427W	0.4516	0.588	0.1364	33	10.98	1.04	0.52	0.523749
YLR049C	0.07297	-0.10243	-0.1754	33	0.53	1.77	0.17	0.363338
YIL063C	0.7606	0.44168	-0.31892	31	-6.79	-9.8	-0.08	0.292407
YDR051C	-0.01591	0.22571	0.24162	32	-6.23	-8.13	0.04	0.636973
YNL288W	0.20349	0.19103	-0.01247	143	34.17	-12.77	0.12	0.5247
YLR203C	0.16297	-0.01736	-0.18033	66	19.2	30.58	0.48	0.43372
YNL121C	0.30203	0.22875	-0.07329	50	7.36	-10.52	0.2	0.234425
YOR212W	-0.27269	-0.25182	0.02087	165	13.5	17.34	0.2	NA
YPR063C	1.1453	1.25412	0.10882	34	-0.24	9.02	0.57	0.767468
YNL327W	-0.13621	-0.10135	0.03486	34	8.11	-0.98	1.05	0.58289
YPL246C	0.67211	0.28887	-0.38324	124	3.03	-10	0.04	0.282728
YPR073C	0.74347	1.06349	0.32002	63	11.51	-21.94	0.23	0.557875
YGL186C	0.33063	0.23344	-0.09719	64	16.07	37.49	0.28	0.455344
YNR044W	-0.88637	-1.01988	-0.13351	32	2.53	13.77	0.1	0.35591
YOL061W	0.13274	0.1595	0.02676	66	6.92	7.75	0.38	0.298178
YEL017C-A	1.20504	1.05907	-0.14597	31	-23.01	-12.27	-0.29	0.574851
YML058W	1.46393	1.37881	-0.08513	30	19.71	-7.6	1.46	0.302684
YDR321W	0.61773	0.4895	-0.12823	28	6.62	-10.71	0.9	0.300295
YDL054C	-0.02161	-0.07175	-0.05014	56	6.21	4.29	0.13	0.564675
YLR268W	0.57968	0.33078	-0.2489	49	15.58	-3.72	0.58	0.303783
YML018C	-0.97771	-1.02923	-0.05152	151	30.31	5.83	0.22	0.329622
YHR052W	0.53045	0.7521	0.22165	28	-6.42	13.71	0.15	0.796788
YLR409C	-0.37129	-0.61744	-0.24615	29	6.69	1.96	0.54	0.586089
YDR105C	-0.25427	-0.27173	-0.01746	256	18.66	-3.82	0.07	0.503493
YGR197C	-0.2387	-0.38559	-0.14689	32	8.05	1.45	-0.03	0.732795
YJR049C	-0.39963	-0.7753	-0.37566	31	-8.5	6.49	-0.34	0.309804
YML032C	-0.24888	-0.06352	0.18535	37	10.15	-4.33	0.29	0.270522
YMR212C	-0.77525	-0.72056	0.05469	127	29.5	5.15	0.5	0.284838
YGR078C	1.04413	1.12552	0.08138	30	-13.31	14.39	-0.17	0.351518
YJL001W	0.69357	0.69392	0.00035	42	-8.38	-9.12	0.06	0.496076
YGL112C	-0.18917	-0.09795	0.09122	28	-20.48	-1.41	-0.21	0.757842
YGR141W	0.04721	0.13688	0.08967	47	4.63	4.88	0.04	0.233049
YCL044C	0.27362	0.25464	-0.01898	28	6.39	6.29	0.61	0.820027
YPR020W	1.40411	1.6612	0.2571	36	11.88	1.85	0.47	0.405891
YGR090W	-0.52875	-0.54343	-0.01468	167	16.79	1.28	0.11	0.593907
YLR406C	1.4151	1.41936	0.00426	28	4.56	-12.64	-0.02	0.545362
YOR048C	-0.65183	-0.67584	-0.02401	31	1.07	-7.11	0.2	0.573007
YDL192W	0.60929	0.7998	0.19051	38	-5	-1.51	0.49	0.770986
YER023W	0.6191	0.39938	-0.21972	28	-10.51	-21.45	0.68	0.5911
YKR052C	0.13758	-0.03106	-0.16863	73	6.05	4.1	0.09	0.432318
YGR255C	-0.78957	-1.11783	-0.32826	71	8.92	7.62	0.2	0.280161
YLR274W	-0.07592	-0.05759	0.01832	30	-4.32	-3.02	0.02	0.454691
YIR038C	0.27964	0.37668	0.09705	27	-12.99	-20.38	-0.11	0.392893
YOR079C	0.16223	0.07871	-0.08352	62	5.69	-0.01	0.06	0.487786
YNR041C	0.1479	0.05034	-0.09756	27	3.82	2.58	0.28	0.430858
YDL040C	0.00944	-0.08615	-0.09559	29	5.93	0.46	0.69	0.428157
YNL123W	-0.12348	-0.29155	-0.16807	107	8.48	2.8	0.01	0.368505
YKR025W	0.81896	0.69746	-0.12149	33	9.32	7.55	0.21	0.427507
YML052W	0.17581	-0.00174	-0.17755	34	-16.73	-7.35	0.1	0.502563
YGR017W	-0.24317	-0.46069	-0.21752	149	-0.26	7.16	0.18	0.498678
YDL212W	0.44999	0.58229	0.1323	47	6.67	8.25	0.44	0.475088
YER105C	-1.24113	-1.36286	-0.12173	39	11.35	-2.89	0.36	0.413484
YJL192C	0.06903	0.01897	-0.05006	27	3.35	-5.97	0.94	0.432557
YHR128W	0.87123	0.92655	0.05532	61	10.67	14.15	-0.1	0.877912
YBR048W	0.99504	0.79484	-0.2002	29	4.58	24.92	-0.04	0.676589
YMR184W	0.85505	1.11753	0.26249	36	22.51	19.63	0.71	0.494116
YPR004C	-0.01729	-0.17415	-0.15686	82	9.25	4.48	-0.09	0.346428
YBL015W	0.78889	0.7635	-0.02539	79	5.85	-0.29	-0.03	0.656591
YHR112C	-0.16031	0.09568	0.25599	65	5.34	12.19	0.18	0.368693
YJL196C	0.30167	0.17749	-0.12418	46	12.31	3.12	0.06	0.386987
YBL071W-A	1.03974	1.42115	0.38141	37	-5.06	-22.75	-0.79	0.532916
YGR235C	0.82286	0.94388	0.12102	49	1.97	-4.41	-0.33	0.617052
YDR286C	0.18625	0.13179	-0.05446	39	1.19	0.59	0	0.436494
YMR161W	0.87299	0.74363	-0.12936	38	-1.14	11.2	-0.06	0.582906
YBR236C	-0.19307	-0.16484	0.02823	41	9.51	28.48	-0.16	0.421084
YLL031C	-0.61536	-0.87686	-0.2615	135	23.79	-1.5	0.08	0.429673
YPR199C	-0.8965	-0.98107	-0.08457	27	-0.96	-1.18	0.13	0.500644
YHR076W	0.44014	0.42998	-0.01016	28	-0.12	-1.54	-0.07	0.789462
YJR141W	-1.61891	-2.15441	-0.5355	35	2.14	6.05	0.03	0.31125
YPL105C	-0.61531	-0.55226	0.06305	26	3.3	22.51	0.07	0.438552
YPL183C	-0.68414	-0.72439	-0.04026	38	-1.14	3.83	-0.08	0.483662
YDL086W	0.66224	0.49826	-0.16398	29	-8.1	-2.12	0.06	NA
YNL138W-A	0.17181	1.29494	1.12313	62	1.97	2.17	0	0.571152
YKL028W	-0.47604	-0.83697	-0.36093	35	5.62	0.12	0.11	0.324961
YDL095W	0.05458	-0.03782	-0.0924	82	20.13	-13.26	0.77	0.316217
YCL033C	0.8328	0.90963	0.07683	26	-2.67	0.47	-0.02	NA
YPR079W	0.21743	0.60673	0.3893	91	-4.08	-32.11	0.01	0.471549
YAL058W	-0.56322	-0.71013	-0.1469	51	0.58	2.39	0.07	0.324198
YLR452C	-1.24005	-1.20365	0.03639	77	10.17	-0.38	0.32	0.393878
YOR210W	1.59421	1.46102	-0.13319	33	-11.39	25.09	-0.61	0.691115
YMR278W	-0.05317	0.00103	0.0542	31	-19.43	-3.7	-0.54	0.580825
YBR171W	0.78884	1.00379	0.21495	29	14.6	-17.74	0.94	0.545598
YKL205W	-0.86577	-0.97123	-0.10546	29	-5.31	1.58	-0.13	0.284519
YCL002C	-1.64764	-1.80393	-0.15628	27	-23.1	-3.01	-0.51	0.353123
YPR129W	0.93492	0.99584	0.06092	32	17.24	13.31	0.34	0.377458
YLR449W	0.55929	0.54658	-0.01271	28	-1.21	11.09	-0.4	0.612485
YDR376W	-0.57941	-0.49551	0.0839	42	-9.12	-3.15	0	0.392295
YGR007W	-0.4517	-0.95264	-0.50093	41	-4.01	-17.29	0.32	0.248549
YGL012W	0.58558	0.4001	-0.18548	27	9.81	2.58	0.79	0.426245
YLR420W	0.35612	0.49884	0.14271	26	-15.57	-9.87	-0.18	0.50642
YIL023C	-0.66716	-0.68644	-0.01928	208	-6.29	-11.9	-0.02	0.342912
YHR215W	0.1702	-0.34108	-0.51128	46	4.93	3.24	-0.01	NA
YJR143C	-0.08886	-0.36997	-0.28111	68	61.34	52.26	0.78	0.515562
YBR221C	0.43332	0.36671	-0.06661	204	31.52	13.57	1.12	0.629526
YJL158C	1.5836	1.56864	-0.01495	28	-6.64	22.87	0.81	0.523351
YDL147W	0.55185	0.59419	0.04234	41	18.66	27.94	0.6	0.606729
YGL026C	0.50547	0.58507	0.07959	32	43.46	25.77	1.47	0.396798
YDR047W	0.43835	0.16793	-0.27042	194	15.96	13.84	0.13	0.414507
YDR037W	0.74156	0.7115	-0.03006	72	34.84	36.69	0.07	0.64809
YIR026C	0.16306	0.42789	0.26484	29	-2.89	11.5	-0.04	0.482619
YBR288C	-0.09875	-0.3802	-0.28145	30	17.07	9.09	0.63	0.490011
YPL244C	-1.03039	-1.50718	-0.47679	45	1.43	-2.74	-0.16	0.24512
YMR222C	0.90906	1.0216	0.11254	41	-6.23	-23.85	0.02	0.468514
YGL206C	0.09793	-0.03141	-0.12934	57	22.2	12.84	0.2	0.415735
YLR163C	0.18813	0.38197	0.19385	49	10.16	15.25	-0.01	0.573045
YBR009C	1.48489	1.47163	-0.01326	26	-9.29	-29.4	-0.17	0.601779
YNR019W	0.24955	0.22213	-0.02742	26	-51.75	-8.77	-1.18	0.506611
YJL104W	0.63698	0.62156	-0.01541	31	3.81	0.65	-0.02	0.74937
YHR169W	0.18499	0.11814	-0.06684	131	-0.26	-2.78	-0.1	0.634743
YOR220W	1.25376	1.26597	0.01221	36	-0.61	3.99	-0.15	0.441148
YDR121W	1.08905	1.05138	-0.03766	99	13.98	9	0.07	0.470444
YPL031C	0.47881	0.33278	-0.14603	27	12.68	-19.14	0.73	0.564781
YJL059W	-0.63279	-0.98627	-0.35348	100	-2.29	2.2	0.02	0.50394
YCL031C	0.14231	0.22261	0.0803	34	12.7	15.5	0.58	0.355638
YER117W	0.73088	0.80036	0.06948	32	-31.91	-9.38	-0.95	0.780092
YDR261C	-0.17855	-0.33728	-0.15873	65	1.89	5.95	-0.11	0.548806
YKL157W	0.1657	0.07051	-0.09519	29	5.67	10.22	0.3	0.447043
YDR194C	-0.49431	-0.79465	-0.30034	25	3.24	-3.28	0.42	0.367816
YIL131C	-0.08419	-0.17976	-0.09557	75	-4.73	-11.08	-0.06	0.648531
YMR062C	0.37095	0.45761	0.08666	25	-17.99	-5.5	-0.44	0.284525
YKR084C	0.43128	0.22089	-0.21039	25	5.5	8.87	0.56	0.624261
YIL008W	0.77793	1.42598	0.64805	55	9.36	14.22	0.15	0.326614
YKL054C	1.0023	1.10446	0.10216	86	12.54	14.25	0.2	0.678431
YFR034C	0.55625	0.59953	0.04329	29	21.73	1.16	0.58	0.36959
YKL142W	1.01525	1.21381	0.19856	52	10.54	26.89	-0.08	0.693396
YOR171C	-0.23696	0.06775	0.30471	70	11.03	13.53	0.16	0.382562
YDL208W	1.01411	0.99251	-0.0216	27	22.21	36.05	0.25	0.7356
YEL038W	0.46203	0.88539	0.42336	27	-38.46	-36.31	0.13	0.629146
YBR241C	0.24678	-0.20386	-0.45064	65	-3.89	6.01	-0.17	0.54491
YOR206W	0.32109	0.1138	-0.20729	31	-3.64	6.98	-0.24	0.372149
YOL159C	-0.30295	0.12683	0.42978	49	1.95	5.02	-0.02	0.817809
YLR200W	0.86444	1.18778	0.32335	34	-2.04	0.21	0.12	0.92572
YLR447C	0.17038	0.14868	-0.02169	44	17.03	12.01	0.27	0.414096
YAL041W	-0.46177	-0.41408	0.0477	89	15.26	9.2	0.23	0.352996
YCR076C	1.00724	1.28691	0.27967	31	-5.08	-4.33	0.03	0.667121
YHR161C	-0.71098	-0.78489	-0.07391	319	13.08	0.03	0.08	0.385274
YNR040W	0.17303	0.27775	0.10473	28	1.21	-7.79	0.14	NA
YGR020C	0.87489	0.88247	0.00758	54	16.62	19.44	0.43	0.675533
YOR043W	-0.90664	-0.77501	0.13163	71	-0.22	12.82	0.12	0.566977
YER154W	-0.4022	-0.49953	-0.09733	26	-0.69	-4.1	0.32	0.353661
YHR049W	0.92262	0.82452	-0.0981	30	-24.53	-11.65	-0.67	0.432402
YBL055C	-0.47459	-0.33509	0.13949	94	4.65	6	0.05	0.240328
YLR285W	0.44618	0.39811	-0.04807	36	-1.24	2.84	0.01	0.305376
YBL079W	-1.34259	-1.72361	-0.38102	28	1.71	6.83	-0.01	0.291267
YPR072W	0.38078	0.52695	0.14617	88	19.9	6.42	0.19	0.475923
YAR002W	0.4446	0.5318	0.0872	27	3.57	2.29	0.13	0.329359
YDR248C	0.24937	0.56672	0.31735	61	20.12	17.78	0.42	0.252914
YKL122C	0.58241	1.12754	0.54513	32	3.36	19.65	0.36	0.752247
YFL022C	0.85171	0.87808	0.02637	77	26.59	2.47	0.52	0.779944
YBR111W-A	0.42323	0.98369	0.56046	26	13.82	4.39	0.44	0.456672
YGR155W	0.527	0.6019	0.07491	25	-19.92	-6.28	-0.3	0.88932
YDR101C	0.25206	0.14728	-0.10478	29	12.55	28.18	0.21	0.608099
YLL045C	1.10641	1.11559	0.00918	26	-21.83	8.23	-0.19	0.78239
YLL028W	0.19507	0.11523	-0.07985	108	12.2	6.56	0.1	0.43454
YJL080C	0.32567	0.457	0.13133	184	23.55	21.56	0.4	NA
YHR190W	0.77143	0.85813	0.0867	51	25.08	31.46	0.68	0.495311
YJL172W	0.38091	0.22102	-0.15989	27	8.82	0.45	0.42	0.378757
YHR072W	-0.9828	-1.1799	-0.1971	84	5.95	30.08	0.16	0.431778
YBL018C	-0.57602	-0.10006	0.47596	31	-5.47	-0.84	0.12	0.284739
YLR395C	1.00754	1.26923	0.26169	54	9.48	5.61	0.01	0.407647
YMR272C	0.67536	0.70715	0.0318	32	33.4	40.55	0.7	0.47587
YJL026W	1.03782	0.97551	-0.06232	43	-2.9	31.08	-0.34	0.544908
YGR185C	0.54691	0.54124	-0.00567	34	18.7	26.27	0.27	0.513211
YDR019C	0.27078	0.33602	0.06524	34	10.17	-10.36	0.17	NA
YKL117W	1.37485	1.44669	0.07184	26	9.92	11.28	0.74	0.449595
YPL090C	0.88946	0.9367	0.04723	32	-2.11	12.41	-0.67	0.366602
YGL226C-A	0.71798	0.87049	0.15251	43	29.73	8.66	0.81	0.649973
YKL164C	1.89679	1.92936	0.03257	78	3.49	12.61	0.39	0.429832
YER110C	0.41045	0.39522	-0.01523	37	13.12	-9.13	0.54	0.505737
YKL192C	1.60902	1.54508	-0.06394	29	30.24	17.46	0.85	0.388583
YLR075W	0.79765	0.85862	0.06097	29	-8.87	2.19	-0.2	0.753237
YBR154C	0.98356	1.0441	0.06053	112	20.46	17.07	0.16	0.419178
YOL001W	-2.14201	-2.05351	0.0885	364	22.19	19.95	0.05	0.458255
YBR207W	0.04055	-0.09018	-0.13073	34	14.7	1.62	0.2	0.46777
YGL010W	-0.04216	-0.15226	-0.11011	53	0.69	6.3	-0.33	0.508267
YCR072C	0.38279	0.30725	-0.07554	54	6.03	1.74	0.08	0.447241
YGL173C	-0.57479	-0.54174	0.03306	334	26.76	15.37	0.25	NA
YGR040W	-1.10049	-0.79391	0.30658	49	3.97	4.46	-0.03	0.848329
YAR015W	0.86661	0.79722	-0.06939	35	4.7	7.66	0.23	0.516304
YDR036C	0.04328	-0.66713	-0.71042	57	16.14	13.16	0.38	0.470355
YMR109W	-1.12076	-1.21909	-0.09832	26	-2.79	7.4	-0.17	0.779726
YLL051C	-1.60991	-1.70113	-0.09122	73	9.54	-3.68	0.16	0.406276
YBR244W	0.81541	1.102	0.28659	39	7.49	9.05	0.25	0.640481
YGL002W	-0.30932	-0.62041	-0.31109	113	2.95	26.31	0.07	0.289742
YBR129C	-0.74221	-1.05949	-0.31728	37	16.07	16.92	0.39	0.327301
YIL014W	-1.01494	-0.97159	0.04335	151	12.4	4.06	0.07	0.410468
YNL232W	0.66486	0.34882	-0.31604	27	4.61	5.07	-0.2	0.589233
YLR172C	0.50168	0.2867	-0.21498	27	4.09	3.68	0.06	0.643223
YIL038C	0.26828	0.28783	0.01955	220	16.62	14.29	0.18	0.602092
YPL169C	-0.1039	-0.25525	-0.15135	39	8.82	11.22	0.06	0.587079
YJL148W	0.6259	1.1701	0.54419	44	17.18	22.9	0.43	0.422383
YFR006W	0.20115	0.06852	-0.13263	182	-0.79	0.14	-0.01	NA
YKL135C	-0.57398	-0.09851	0.47547	104	16.49	0.27	0.21	0.517257
YDR322C-A	0.81017	1.0283	0.21813	34	-1.03	6.99	-0.07	0.444404
YGL196W	-0.17018	-0.2435	-0.07332	63	4.7	16.09	0.12	0.39035
YDR061W	-0.01296	0.01599	0.02894	57	4.42	-7.76	-0.12	0.48256
YBR046C	0.59258	0.68991	0.09733	59	3.43	7.66	0.02	0.654122
YDR339C	0.40676	0.80952	0.40276	29	6.69	8.21	0.17	0.524514
YLR325C	1.19682	1.5558	0.35898	24	-34.01	7.05	-1.51	0.769498
YDR139C	0.68089	0.56656	-0.11433	27	24.45	1.63	0.84	0.384363
YBR210W	0.02952	0.20084	0.17131	28	9.41	-15.02	0.9	0.657248
YOR025W	-0.63308	-0.43059	0.2025	44	3.15	4.65	-0.1	0.895443
YBL089W	-0.67814	-0.58787	0.09026	47	2	5.94	-0.52	0.437928
YNL023C	-0.94268	-1.20175	-0.25907	40	3.2	11.41	0.1	0.460913
YHR017W	-0.1491	-0.34315	-0.19405	28	-1.38	9.95	-0.12	0.966638
YNL080C	-1.21291	-1.89301	-0.6801	90	12.16	15.71	0.34	0.358219
YCR088W	1.54495	1.69605	0.1511	45	13.96	14.37	0.23	0.787275
YKL065C	0.32953	0.52409	0.19456	32	-6.62	2.38	-0.66	0.384759
YGL027C	-0.15292	-0.19304	-0.04013	50	14.86	-3.36	0.32	0.59479
YJR133W	0.59331	0.57488	-0.01844	91	9.11	3.97	-0.29	0.644947
YPR043W	0.64784	0.57979	-0.06805	24	14.19	18.18	0.44	0.841085
YKL113C	0.41078	0.19459	-0.21619	150	5.76	1.34	0.03	0.630945
YGL172W	0.35903	0.57786	0.21883	25	5.1	6.97	0.05	0.543069
YNL010W	0.84544	0.85067	0.00524	41	-2.49	4.76	-0.55	0.336797
YER145C	0.35526	0.22823	-0.12704	30	18.92	-2.05	1.24	0.449317
YFR018C	-0.46362	-0.72399	-0.26037	64	0.21	-17.82	0.23	0.372206
YMR226C	1.03456	1.12533	0.09077	32	-6.61	-4.95	0.07	0.464353
YHR092C	0.79168	0.71263	-0.07905	76	1.97	-7.12	-0.45	0.908212
YJR132W	-0.4048	-0.52528	-0.12049	95	9.88	8.65	0.21	0.389648
YKR043C	1.20001	1.24371	0.0437	30	-4.01	13.09	0.08	0.73527
YDL100C	0.58071	0.58047	-0.00024	26	0.81	-2.66	-0.13	0.515244
YPL225W	0.98769	1.2206	0.2329	25	30.67	23.66	1.07	0.854404
YHR208W	0.50314	0.49754	-0.0056	24	19.7	25.88	0.46	0.521627
YPR058W	0.07784	-0.0842	-0.16204	68	24.51	11.25	0.67	0.469955
YMR251W-A	1.21128	1.2899	0.07862	29	-28.84	0.39	-0.86	0.555842
YFR010W	0.52663	0.63123	0.10461	84	1.57	-8.75	0.08	0.455124
YHR133C	0.15823	0.30584	0.14761	36	-11.04	1.07	-0.57	0.35066
YPL079W	0.86882	0.91867	0.04985	28	15.01	16.27	-0.22	0.819481
YLL024C	0.86039	0.95925	0.09886	25	-4.8	12.14	1.14	0.704275
YBR025C	0.74393	0.84006	0.09613	40	16.29	30.42	-0.07	0.706275
YBR222C	0.34897	0.34645	-0.00252	128	29.53	29.13	0.23	0.540621
YNL157W	0.1917	0.76383	0.57212	130	15.33	13.38	0.14	0.368688
YER003C	0.8167	1.00373	0.18703	30	0.39	35.27	-0.07	0.635134
YCR026C	-0.67502	-0.81181	-0.13679	64	7.22	18.04	0.14	0.377379
YOR179C	0.01222	0.43967	0.42745	27	2.92	3.59	-0.06	0.539447
YDL133C-A	1.00727	1.50287	0.4956	24	11.7	-37.83	1.63	0.362934
YBL064C	0.70724	0.82342	0.11618	34	4.34	-4.66	0	0.475088
YPR100W	0.37153	0.68116	0.30963	23	-2.16	7.35	0.14	0.539547
YER031C	0.37101	0.29009	-0.08092	25	4.4	18.1	0.2	0.524126
YLR074C	0.89139	1.2447	0.35331	26	24.78	26.77	0.39	0.408034
YPL078C	0.43683	0.50187	0.06504	56	20.75	25.51	-0.81	0.461712
YDL174C	-0.30535	-0.4492	-0.14385	62	18.69	20.66	0.09	0.484576
YCR028C	-0.72949	-0.75095	-0.02145	90	46.94	14.18	0.55	0.331676
YHR065C	0.4355	0.49113	0.05563	29	-0.43	2.4	-0.07	0.776255
YNL159C	0.01823	-0.21944	-0.23767	23	1.94	18.41	0.12	0.683209
YJR124C	-0.62133	-0.61038	0.01095	44	7.35	11.45	0.09	0.563825
YIL133C	0.70154	0.74917	0.04763	39	-9.87	-4.63	-0.73	0.643903
YNL108C	1.02383	1.11206	0.08823	23	23.74	29.01	0.4	0.640057
YBR002C	-0.59659	-0.48033	0.11626	49	1.27	3.63	0	0.269028
YKR074W	0.97578	0.94145	-0.03433	32	-1.1	-21.22	0.21	NA
YKL056C	0.23567	0.29315	0.05748	110	-3.19	-0.78	0.1	0.636982
YPL011C	-0.44962	-0.47183	-0.02221	37	6.36	11.67	0.21	0.432015
YDL045C	0.14212	-0.13981	-0.28193	139	1.33	2.23	0.18	0.369489
YPR173C	-0.31728	-0.37339	-0.0561	48	5.62	5.92	0.18	0.360373
YDR503C	0.11323	-0.25952	-0.37275	24	-13.1	-6.17	-0.31	0.365396
YCR036W	0.08664	0.09654	0.00989	37	6.35	8.12	0.18	NA
YOR150W	0.21748	-0.1881	-0.40557	30	14.31	-1.13	-0.03	0.331759
YDR100W	0.90998	1.12219	0.21221	29	-10.08	1.59	-0.42	0.469449
YHR086W	-0.13671	-0.22941	-0.09269	207	15.77	13.72	0.18	0.476498
YBL040C	0.45426	0.7139	0.25964	24	30.84	-15.19	1.64	0.522321
YBR109C	1.25638	1.41847	0.16209	30	0.85	0.89	0	0.499692
YGR172C	0.55419	0.49549	-0.0587	33	3.03	7.86	0.08	0.566961
YHR067W	-0.44963	-0.76964	-0.32	23	-11.01	-4.75	-0.12	0.348741
YJL171C	0.47407	0.26179	-0.21227	40	6.54	12.73	0.03	0.399978
YOR321W	-0.18448	-0.32224	-0.13775	45	8.4	16.15	0.16	0.381896
YBR017C	-0.231	-0.25218	-0.02118	50	4.16	11.36	0.2	0.709986
YDL180W	-0.73786	-0.79817	-0.06031	386	5.08	3.27	0.01	0.353444
YMR113W	-0.03659	0.07986	0.11645	47	5.84	7.04	-0.09	0.477425
YBR003W	-0.497	-0.6174	-0.12041	24	1.74	11.51	-0.09	0.370807
YMR083W	0.50426	0.51459	0.01033	66	34.21	16.39	0.98	0.434989
YOL007C	0.60742	0.86878	0.26137	67	28.72	30.16	0.34	0.464477
YLL049W	-1.2202	-1.54866	-0.32846	31	5.15	-4.24	0.09	0.322609
YJL069C	0.37191	-0.02428	-0.3962	24	10.76	6.55	0.38	0.45934
YKL081W	0.62596	0.71719	0.09123	29	41.48	-5.82	1.35	0.604885
YBR251W	1.15016	0.79971	-0.35045	41	5.44	7.86	-0.1	0.546145
YGR247W	0.16916	0.3193	0.15014	84	4.59	16.97	-0.05	0.698287
YGL100W	-0.06163	-0.18361	-0.12198	23	-8.23	-1.34	0.43	0.320472
YJR072C	0.66135	0.66308	0.00173	35	18.58	13.75	0.45	0.50007
YPR009W	-0.90706	-0.90954	-0.00248	104	17.62	10.29	-0.07	0.369449
YML092C	0.80724	1.06561	0.25838	23	-3.02	-3.81	0.22	0.487381
YOR283W	0.46385	0.88871	0.42486	84	24.35	21.99	0.36	0.598686
YLR258W	-0.15534	-0.31439	-0.15905	68	3.92	5.94	-0.06	0.316028
YPL126W	-0.31433	-0.32614	-0.01181	27	53.44	22.55	1.54	0.459417
YDR170C	-0.79745	-0.97328	-0.17583	274	13.78	-1.65	0.01	NA
YOR326W	-0.81984	-1.01301	-0.19316	193	21.27	-0.42	0.27	NA
YFL017C	0.57725	0.3602	-0.21705	23	-3.17	0.87	-0.14	0.50144
YDR377W	1.02143	1.3058	0.28437	77	-8.04	11.5	-0.32	0.613145
YGL161C	0.41324	0.44042	0.02718	96	21.68	11.4	-0.14	0.563206
YDL125C	0.66326	0.64808	-0.01518	212	7.15	5.8	-0.06	NA
YJL008C	0.14335	0.01866	-0.12469	27	28.69	32.41	0.05	0.589101
YER149C	0.19811	-0.53026	-0.72838	59	-1.14	1.44	-0.05	0.31608
YML051W	-3.0724	-2.70902	0.36338	56	44.57	37.59	0.73	0.329433
YDL144C	-0.25032	-0.40782	-0.1575	24	-14.08	4.91	-0.09	0.698171
YOL092W	0.58889	0.56519	-0.0237	23	-17.02	-33.1	1.25	0.420406
YBR111C	0.99646	0.81282	-0.18364	34	-0.61	-5.66	-0.05	NA
YOR164C	0.39408	0.45906	0.06498	24	-10.03	41.69	-1.06	0.436094
YFL034C-A	0.9153	1.29402	0.37872	32	17.6	35.89	0.25	0.814447
YFL009W	-0.36002	-0.45272	-0.09271	180	2.95	13.6	0.02	0.329242
YLR413W	0.11551	0.18411	0.0686	46	-20.2	4.31	0.01	0.39614
YER095W	0.349	0.27432	-0.07468	56	8.33	10.01	-0.07	NA
YMR276W	1.19621	1.25279	0.05658	24	19.25	8.8	1.18	0.466327
YHR042W	-0.16031	-0.29003	-0.12972	33	15	-37.69	0.76	0.363985
YJR063W	1.05829	1.17178	0.11348	37	4.81	14.12	0.05	0.688277
YDL121C	0.36577	0.30444	-0.06133	28	-24.68	-9.62	-0.52	0.253198
YGR282C	0.86649	0.89127	0.02478	24	4.86	33.51	-0.2	0.6208
YLR300W	0.58168	0.71062	0.12894	106	33.59	49.38	0.61	0.657398
YLR304C	0.15012	0.15411	0.004	41	7.67	44.82	-0.26	0.417393
YIL039W	0.02909	0.02148	-0.00761	43	13.42	23.87	-0.09	0.456104
YDR158W	0.5981	0.63938	0.04128	23	-24.78	-7.34	-0.54	0.824288
YMR116C	0.49125	0.31534	-0.17591	31	-6.28	13.78	-0.96	0.679639
YGL076C	1.1352	1.22223	0.08703	25	-6.7	-12.64	0.07	0.634201
YLR221C	0.50353	0.36734	-0.13619	40	6.26	4.81	0.19	0.408208
YMR042W	0.10856	-0.35222	-0.46078	83	-3	-5.89	0.03	0.491183
YGL242C	0.92238	1.09787	0.17549	44	3.51	-6.65	-0.28	0.377326
YDR398W	0.23776	0.00912	-0.22864	163	17.02	22.61	-0.01	0.405511
YPL133C	-1.03109	-0.56901	0.46207	53	11.37	12.21	-0.07	0.644068
YDL007W	0.64474	0.64964	0.00491	37	15.07	18.35	-0.04	0.565332
YGR105W	0.78689	1.64505	0.85816	61	24.4	42.51	0.27	0.752199
YLL008W	-0.0919	-0.05208	0.03982	28	-6.43	0.92	-0.23	0.372293
YOR126C	-0.07276	0.35876	0.43151	24	12.14	-4.53	0.66	0.612258
YNL208W	1.63804	1.76575	0.12771	35	5.05	52.89	-0.45	0.891228
YDR380W	0.11125	0.16599	0.05474	147	14.22	11.19	-0.09	0.476047
YDL064W	1.04438	1.27209	0.22771	32	6.08	12.4	0.25	0.457082
YNL030W	1.358	1.24335	-0.11464	57	-11.13	-29.34	-0.21	0.66302
YDL155W	-0.92322	-1.07784	-0.15462	132	9.38	19.55	0.03	0.490161
YBR038W	-0.18909	-0.16915	0.01994	94	14.89	2.73	0.17	0.545992
YBR145W	0.11739	-0.30643	-0.42382	64	6.2	3.89	0.15	0.488045
YKL103C	0.61925	0.48523	-0.13402	65	13.83	21.63	-0.04	0.443376
YLR199C	0.32839	0.47472	0.14633	39	-2.74	19.72	0.14	0.46775
YML029W	-0.38573	-0.19687	0.18886	100	7.24	9.79	0.02	0.581134
YHR046C	-0.0848	0.1921	0.2769	76	3.98	-0.16	-0.25	0.440162
YOL142W	0.625	0.60168	-0.02333	24	20.43	16.61	0.58	0.750883
YDL230W	0.05483	-0.43274	-0.48757	55	5.62	4.55	0.04	0.382687
YNL168C	0.83564	0.86808	0.03244	40	7	2.09	-0.2	0.295931
YEL063C	0.11849	-0.0693	-0.1878	39	9.44	14.68	0.11	0.535995
YNL052W	1.178	1.28083	0.10283	37	2.27	14.78	-0.22	0.533689
YGL003C	-0.71375	-0.51213	0.20161	84	9.76	5.69	0.14	0.233993
YOR292C	-0.46708	-0.51201	-0.04494	23	8.93	11.2	0.16	0.341066
YLR188W	-1.14813	-1.22551	-0.07739	75	14.06	9.39	0.09	0.368628
YPL144W	0.79096	0.50217	-0.28879	29	13.96	-4.65	0.63	0.35898
YFR001W	0.3507	1.28557	0.93487	44	27.25	20.28	0.34	0.565189
YLL006W	-0.28504	-0.21001	0.07503	40	9.14	0.55	-0.09	0.583017
YAL035W	0.32569	0.36807	0.04239	22	8.13	17	0.51	0.535036
YOR174W	-0.12446	-0.4307	-0.30625	215	10.64	3.7	0.06	0.447846
YOR276W	0.92197	0.85787	-0.0641	42	10.48	5.61	-0.02	0.353385
YLR441C	0.61078	0.69864	0.08786	22	19.02	20.68	0.41	0.675533
YJL055W	0.67272	0.38625	-0.28647	22	-7.84	3.85	-0.16	0.347771
YFR024C-A	0.23106	0.29121	0.06015	25	4.81	17.74	-0.34	0.474122
YMR035W	-0.00717	0.51122	0.51839	22	11.03	6	-0.09	0.597015
YIL116W	0.70581	0.64686	-0.05895	22	-1.81	-11.6	0.02	0.530522
YLR389C	-0.43867	-0.52453	-0.08586	93	5.62	4.54	-0.06	NA
YDL075W	1.25866	1.32286	0.06421	22	-7.95	-15.94	-0.84	0.61988
YDL191W	0.86046	1.10786	0.2474	50	3.12	25.81	-0.37	0.510623
YLR118C	0.62417	0.57989	-0.04428	36	-10.19	-11.65	-0.46	0.433015
YNL118C	-0.42352	-0.18463	0.23889	56	1.16	2.08	-0.04	0.504255
YNL130C	0.16343	0.13585	-0.02758	37	7.59	8.94	0.33	0.549625
YDR482C	0.50897	0.60727	0.0983	112	12.18	0.68	0.15	0.400364
YCR017C	-0.41365	-0.57486	-0.16121	32	29.13	13.16	0.76	0.295379
YAL025C	0.67281	0.74667	0.07386	25	-9.09	10.41	-0.47	0.333263
YLR016C	-0.26333	-0.12259	0.14074	151	8.65	9.73	0.04	0.567994
YMR120C	0.39411	0.3976	0.0035	37	9.76	-11.91	0.49	0.624501
YBR067C	1.25001	1.09094	-0.15907	31	0.94	32.71	-0.06	0.657415
YER078C	-0.7518	-0.68221	0.06959	55	11.26	-3.74	-0.02	0.356661
YKL174C	-0.58959	-0.10809	0.4815	59	3.42	12.86	-0.02	0.606914
YDL164C	-0.26745	-0.09514	0.17231	53	-2.02	0.53	-0.3	0.280534
YDR168W	0.92072	1.38183	0.46111	24	-11.7	-16.36	0.14	0.784051
YNL131W	1.03838	1.30716	0.26878	217	23.47	3.94	-0.06	0.378931
YGL254W	-0.40396	0.1991	0.60306	33	-2.65	-1.48	-0.09	0.60016
YOR294W	1.40668	1.37648	-0.0302	48	14.38	26.42	-0.43	0.437543
YGR065C	-0.83022	-0.80929	0.02093	126	14.38	7.33	0	0.448298
YGL213C	0.06188	0.43404	0.37216	22	5.49	4.44	0.43	0.617943
YLR005W	-0.25427	-0.21007	0.0442	33	12.18	2.55	0.28	0.501259
YPR098C	0.76785	0.94414	0.17629	22	-18.16	-16.23	-0.26	0.616729
YFR025C	-0.31616	-0.12725	0.18891	29	21.26	3.72	0.41	0.227063
YOR316C	0.13545	0.02604	-0.10941	142	12.01	11.57	0.02	0.467682
YJL062W	0.01397	-0.28907	-0.30305	34	5.94	9.73	0.17	0.414845
YIL138C	1.06166	1.09918	0.03752	22	1.97	-2.41	0.1	0.488789
YPL189C-A	1.46655	1.00257	-0.46398	75	36.5	10.87	0.12	0.340238
YGR162W	-0.07067	0.14597	0.21664	51	12.9	52.09	-0.35	NA
YKL100C	-0.44603	-0.35488	0.09115	26	-8.22	14.56	-0.49	0.453931
YOR360C	-0.21787	-0.28409	-0.06622	222	21.38	22.4	0.26	0.422383
YER074W	1.18769	1.32504	0.13735	29	-15.81	-10.17	-0.67	0.54869
YMR054W	-1.1752	-1.17237	0.00282	53	7.36	20.04	0.03	0.510467
YLR401C	-0.14698	-0.23101	-0.08403	45	12.85	7.58	0.08	0.311016
YHR132C	0.35622	0.26271	-0.09351	44	-2.13	0.58	-0.24	0.377326
YOR221C	0.38164	-0.03641	-0.41805	64	5.02	3.73	0.12	0.17669
YBR030W	-1.35966	-1.14862	0.21103	65	1.73	2.54	-0.15	0.396225
YKL006W	0.92658	0.96968	0.0431	29	-56.5	23.36	-1.84	0.669896
YGL115W	-0.31311	-0.31731	-0.0042	123	40.9	11.35	0.17	0.482829
YIL145C	0.06643	0.16034	0.09391	45	9.13	-11.19	0.35	0.302264
YIL036W	0.11834	0.08611	-0.03223	59	4.85	4.42	-0.06	0.441319
YPL226W	0.01187	0.04155	0.02969	61	17.26	13.39	0.27	0.44972
YCL064C	0.56981	0.50404	-0.06577	36	12.13	9.32	0.3	0.406033
YDR116C	0.11985	0.20557	0.08572	26	-7.21	17.4	-0.32	0.39657
YGR207C	0.85636	1.0883	0.23195	27	0.48	1.85	0.08	0.963617
YGR262C	0.373	0.72543	0.35243	26	6.51	6.31	-0.03	0.385363
YJR017C	0.40418	0.37268	-0.0315	24	-1.09	2.9	0.61	0.409571
YCR011C	-0.73242	-0.65582	0.0766	137	-2.2	6.88	0.12	0.339519
YMR202W	0.38393	0.11474	-0.26919	36	-10.73	18.66	-1.4	0.343369
YEL058W	0.1954	0.14431	-0.05109	33	9.39	13.99	0.62	0.294919
YLR370C	1.322	1.18111	-0.1409	32	14.56	18.8	0.57	0.580951
YLR179C	0.7932	0.84004	0.04684	36	8.2	8.47	0.08	0.540374
YGR284C	0.81601	0.77672	-0.03929	43	7.4	14.51	-0.17	0.506466
YHR025W	0.51274	0.32072	-0.19203	28	17.7	23.29	0.26	0.550848
YKL207W	0.20595	0.37421	0.16826	22	-19.01	-11.56	-0.02	0.275811
YOR063W	0.48477	0.40658	-0.0782	25	15.65	30.95	0.43	0.696664
YOL039W	1.31823	1.49879	0.18056	98	27.84	4.21	0.13	0.590804
YKL001C	0.30818	0.07304	-0.23515	31	12.76	8.05	0.44	0.586105
YGL166W	0.7409	0.64725	-0.09365	23	10.59	-9.94	0.28	0.404592
YPR133W-A	1.01954	1.07395	0.05441	27	22.33	-3.14	0.48	0.690443
YDL051W	0.27028	0.33173	0.06144	31	12.25	7.49	0.06	0.616515
YIL041W	0.91791	1.09181	0.1739	24	-2.65	27.53	-0.1	0.452768
YPL002C	-0.71371	-1.15287	-0.43916	21	-2.9	-8.02	0.68	0.465705
YPR069C	0.68842	0.60255	-0.08587	23	46.78	39.06	1.42	0.389497
YML024W	0.74077	0.87616	0.13539	23	16.42	50.33	0.44	0.650396
YDL184C	1.15122	1.75631	0.6051	24	-5.4	-34.67	0.39	0.455035
YDR092W	1.18046	1.58765	0.40719	74	51.43	12.52	0.14	0.639517
YBL036C	0.54582	0.55912	0.0133	26	-0.47	-5.37	0.06	0.473855
YDR390C	-0.2688	-0.29591	-0.02711	21	3.79	8.22	-0.03	0.523427
YPL143W	0.96556	0.97572	0.01016	21	-47.84	0.53	-1.62	0.806515
YPL030W	0.20076	0.17089	-0.02987	48	5.93	9.38	-0.15	0.793956
YPR086W	-0.1071	0.05162	0.15872	39	27.67	16.02	0.47	0.301485
YDR167W	0.75662	0.77592	0.0193	21	5.47	3.13	0.3	0.534871
YMR121C	1.78276	1.79929	0.01653	96	16.88	27.85	0.13	0.434962
YNL138W	0.70852	0.70446	-0.00406	27	23.68	9.26	0.56	0.484064
YDR368W	0.94885	1.01886	0.07001	72	14.17	20.63	-0.22	0.54866
YPL095C	-0.18969	-0.0555	0.13419	148	4.11	9.29	-0.04	0.418975
YOR090C	-0.66959	-0.82249	-0.1529	169	16.09	8.6	0.06	0.415636
YDR451C	0.92291	0.64282	-0.28009	96	8.24	10.17	0.05	0.476239
YML105C	0.79082	1.02466	0.23384	21	-25.26	4.75	-0.72	0.736302
YIL103W	0.20448	0.26981	0.06533	28	4.37	3.25	0.14	0.448895
YLR353W	-1.79806	-1.70601	0.09205	53	8.22	-8.6	0.1	0.309217
YLR073C	-0.67639	-0.61351	0.06287	58	24.31	29.03	0.45	0.231657
YAR003W	-0.63746	-0.48794	0.14952	30	19.99	13.48	0.73	0.296547
YBR193C	0.35803	0.71105	0.35302	39	2.36	5.43	-0.16	0.388315
YOR291W	-1.41661	-1.71733	-0.30072	48	12.15	-1.8	-0.03	NA
YMR250W	0.17112	0.11077	-0.06035	40	13.63	15.26	0.12	0.479933
YOR021C	0.70427	0.95909	0.25482	21	10.72	-6.32	0.36	0.363802
YDR055W	0.83618	0.75601	-0.08017	51	13.24	5.12	0.2	0.373209
YER014W	-0.13927	-0.22012	-0.08086	35	5.55	1.64	0.01	0.42601
YEL015W	0.16159	-0.0118	-0.1734	24	7.72	6.28	0.23	0.659072
YLR350W	1.18561	1.15082	-0.03479	43	10.03	4.26	-0.04	0.496237
YIL088C	-0.42381	-0.71412	-0.2903	51	1.01	35.82	-0.43	0.277257
YNR022C	0.49236	0.62094	0.12857	22	14.66	0.27	0.48	0.519428
YDR349C	-1.03955	-1.13338	-0.09383	91	19.62	7.32	-0.03	0.351907
YDR182W	-0.11833	-0.39629	-0.27797	42	-9.1	2.16	-0.19	0.320675
YJR042W	-0.73012	-0.59058	0.13955	75	18.74	-8.83	0.34	0.484809
YDL140C	-0.88021	-0.87112	0.00909	49	0.15	14.91	-0.18	NA
YER006W	0.38632	0.45428	0.06796	23	-48.73	-19.18	-1.01	0.473853
YKR030W	0.0315	0.25701	0.22551	28	11.21	2.91	0.32	0.484569
YHR009C	-0.81525	-1.07978	-0.26453	78	2.52	14.72	-0.05	0.533125
YMR091C	0.57543	0.61407	0.03864	34	8.01	1.62	0.21	0.629251
YGR283C	-0.08265	-0.17821	-0.09557	26	2.4	0.66	-0.03	0.406696
YDL112W	-0.98462	-0.8508	0.13383	44	3.84	0.89	-0.02	NA
YNL186W	-0.49566	-0.11094	0.38472	237	25.31	24.73	0.12	0.331687
YBR274W	-0.90859	-0.90266	0.00593	46	10.14	11.08	0.04	0.435892
YER126C	0.69333	0.71178	0.01844	27	9.88	10.48	0.02	0.71074
YDR328C	1.15303	1.32979	0.17676	69	25.49	36.66	-0.41	0.39473
YJL054W	-0.63513	-0.56779	0.06734	21	17.18	24.43	-0.05	0.503038
YCL052C	-0.59444	-0.56971	0.02473	34	9.15	3.72	0.13	0.367627
YPR154W	1.12882	1.27397	0.14515	43	11.1	15.49	-0.42	0.970252
YNL320W	-0.00184	0.31168	0.31352	60	10.12	9.46	0.19	0.204002
YJL178C	0.21509	0.16308	-0.052	24	4.39	19.11	-0.43	0.489216
YDR471W	0.8955	0.9279	0.03241	21	-9.33	8.39	-0.48	0.720509
YLR065C	-0.30353	-0.35964	-0.05611	22	17.3	3.45	0.22	0.46548
YDR304C	1.06989	1.05053	-0.01936	43	-10.06	3.57	-0.42	0.373245
YGL099W	0.34929	0.27074	-0.07856	41	10.4	9.58	0.14	0.484182
YLR083C	-0.24025	-0.21486	0.02539	78	65.3	44.44	0.19	0.507183
YOL020W	-0.78562	-1.43638	-0.65077	112	21.22	21.92	0.49	0.321647
YMR315W	0.81715	0.891	0.07385	72	18.83	26.06	0.4	0.731623
YNR033W	-0.82817	-0.55887	0.2693	39	12.77	15.45	0.08	0.329037
YER150W	1.29518	1.31422	0.01904	22	3.45	10.38	0.06	0.496098
YER007C-A	0.77771	0.65433	-0.12338	31	-1.63	-3.62	-0.15	0.451485
YGL097W	0.26203	0.29196	0.02992	59	10.7	27.03	-0.1	0.55794
YLR209C	0.42184	0.36199	-0.05985	21	-0.48	-5.77	0.42	0.618245
YGL246C	-0.17834	-0.3736	-0.19526	57	5.62	-0.79	-0.04	0.426464
YER141W	0.0586	-0.02313	-0.08172	213	3.81	-27.67	0.01	0.388528
YLR018C	0.19236	-0.19057	-0.38293	82	28.11	12.88	0.14	0.321069
YGR203W	1.0166	0.61729	-0.39931	325	14.57	6.09	-0.01	0.523301
YHR062C	-0.13166	0.0635	0.19516	45	3	8.57	-0.25	0.276647
YJR021C	-1.00747	-1.40793	-0.40046	125	-7.45	-30.97	-0.03	0.491414
YDR211W	-0.37865	-0.18965	0.189	58	6.68	4.6	0.1	0.767592
YER127W	0.7785	1.05833	0.27984	21	6.16	1.35	0.34	0.648703
YJL122W	0.80843	0.68538	-0.12305	30	-7.78	28.76	-0.71	0.638295
YML073C	0.73181	0.87482	0.14302	26	-53.16	-41.01	-1.72	0.539981
YMR215W	0.23863	0.30421	0.06558	21	21.74	10.48	1.05	0.348563
YMR208W	0.34478	0.40994	0.06516	21	5.19	19.29	-0.11	0.551699
YCR052W	-0.1203	0.02361	0.14391	21	13.77	3	0.01	0.571152
YKL007W	0.60273	0.65944	0.0567	21	-9.73	26.04	-0.52	0.631725
YIL044C	0.50324	0.46559	-0.03765	47	11.9	10.81	0.09	0.416541
YOL158C	-1.54372	-1.46397	0.07975	24	12.41	26.68	0.22	0.374396
YLR008C	0.58129	0.62713	0.04584	85	29.46	-3.77	0.43	0.44317
YPR062W	0.61298	0.44026	-0.17272	21	-19.68	-6.74	-0.41	0.252882
YDL063C	-0.41558	-0.40335	0.01223	104	10.92	5.08	0.34	0.455787
YDR091C	0.37279	0.40355	0.03076	75	29.34	1.51	0.6	0.591506
YAL029C	-2.05006	-2.27505	-0.22499	49	14.45	2.48	0.04	NA
YER088C	-0.20137	-0.071	0.13036	462	23.99	23.84	0.21	0.431131
YIL106W	0.53378	0.67292	0.13914	104	2.23	7.19	-0.03	0.420627
YOR168W	0.3987	0.42036	0.02166	31	2.11	11.87	-0.73	0.816093
YAL009W	-0.5236	-0.69795	-0.17435	27	8.06	3.19	-0.18	NA
YKL127W	0.39036	0.48017	0.0898	21	-9.18	11.66	-0.07	0.393255
YNL049C	-0.92353	-0.63471	0.28882	41	-4.84	0.15	-0.05	0.686713
YDL088C	-0.19566	-0.06243	0.13323	157	12.1	10.76	0.04	0.709388
YPL131W	0.76063	0.74301	-0.01762	21	48.04	29.51	1.38	0.823375
YGR111W	0.62592	0.16116	-0.46476	39	11.06	4.56	0.01	0.453333
YBR143C	0.22964	0.25588	0.02624	22	3.95	-0.43	0.48	0.701399
YDR224C	1.41747	1.64124	0.22377	36	29.12	38.53	0.28	0.659242
YOR340C	0.59948	0.55414	-0.04534	67	4.89	25.29	-0.06	0.33167
YHR146W	1.0769	1.11253	0.03563	27	12.7	15.19	0.13	0.72878
YDL083C	0.97576	1.08082	0.10506	21	-13.82	7.53	-1.03	0.771487
YBR058C-A	0.891	0.99903	0.10803	46	16.35	3.07	-0.15	0.561359
YHL034C	1.12868	1.25276	0.12408	113	27.43	-0.33	0.11	0.767526
YPR113W	-0.05195	0.07917	0.13113	21	11.7	3	1.48	0.567891
YMR143W	0.96844	1.14184	0.1734	29	-56.47	-13.41	-2.4	0.612741
YJR047C	3.19717	3.63681	0.43964	31	-3.62	4.42	-0.24	0.788434
YLR109W	1.5163	1.506	-0.0103	30	6.23	42.67	0.15	0.738019
YBR256C	-0.26987	-0.09729	0.17258	22	12.97	7.07	0.16	0.584811
YDR188W	0.21655	0.13025	-0.0863	49	45.3	46.2	0.26	0.417975
YGR244C	0.45282	0.41086	-0.04195	99	11.12	12.87	0.14	0.6016
YNL135C	1.25622	1.40525	0.14903	20	-5.95	18.74	-0.34	0.764303
YML011C	0.2542	-0.04772	-0.30192	35	4.55	1.95	0.05	NA
YIL009C-A	-0.6653	-0.00987	0.65542	38	18.67	21.51	0.09	0.566977
YFL028C	0.0915	0.18094	0.08945	28	20.16	3.24	0.39	0.612884
YPL231W	-0.35157	-0.23795	0.11362	82	13.89	-4.67	-0.01	NA
YPL149W	-1.49101	-0.49594	0.99506	109	10.91	-2.17	0.09	0.396409
YKR081C	0.77361	0.73982	-0.03379	42	14.01	21.74	0.1	0.717862
YDR129C	0.76063	0.75789	-0.00274	59	30.4	8.72	0.35	0.61111
YDR002W	1.17944	1.14242	-0.03702	61	7.58	-13.37	-0.14	0.688277
YLR344W	1.11814	1.18249	0.06435	38	-35.15	24.89	-1.78	0.634201
YKL195W	0.58629	0.419	-0.16729	23	25.16	37.31	0.34	0.544749
YOR052C	1.33163	1.11422	-0.21741	106	47.6	46	0.11	0.877912
YPL249C-A	1.31356	1.30947	-0.00409	29	-4.31	25.2	-1.26	0.864195
YGL043W	0.54028	0.65521	0.11493	24	5.67	3.07	0.22	0.52354
YCR082W	0.28552	0.12358	-0.16194	36	20.99	36.12	0.9	0.314348
YEL059C-A	1.01082	0.2858	-0.72503	127	6.61	29.32	-0.09	0.331826
YNL081C	0.27129	0.30578	0.0345	49	0.79	8.38	-0.26	0.504526
YBR149W	0.83127	0.90898	0.07771	29	24.84	22.4	0.5	0.562929
YOL003C	-0.42442	-0.28459	0.13983	35	2.11	5.45	-0.07	0.527714
YER035W	1.80216	1.84802	0.04586	208	18.78	12.41	0.08	0.566207
YER087C-B	0.71304	1.16571	0.45266	35	27.16	24.96	0.85	0.641471
YJR135W-A	1.44304	1.33705	-0.106	23	-0.07	29.99	-0.89	0.627061
YLR029C	0.91291	0.77204	-0.14087	27	-11.26	12.2	0.24	0.570453
YKL116C	-0.35794	-0.26151	0.09643	120	9.79	4.24	0	NA
YBR162W-A	0.77365	0.89575	0.1221	77	31.67	46.06	0.28	0.38747
YDR231C	0.49001	0.48523	-0.00477	27	-5.87	9.58	-0.42	0.616555
YHR103W	-1.30371	-1.27961	0.02409	82	15.79	6.55	0.13	0.526481
YDR469W	0.17515	-0.06766	-0.24281	24	1.07	11.78	-0.07	0.548396
YHR074W	-0.32494	-0.25247	0.07248	25	14.95	16.52	-0.05	0.527295
YNL243W	0.16371	0.08146	-0.08225	51	23.7	21.01	0.07	0.443902
YIL111W	0.72044	0.67612	-0.04432	23	-18.86	19.13	-0.95	0.476224
YML079W	0.43188	0.94792	0.51604	20	9.47	-1.15	0.3	0.325808
YCL035C	1.61803	2.02175	0.40372	45	18.86	37.2	0.49	0.708066
YJR057W	0.44568	0.44482	-0.00086	20	-5.8	1.8	-0.14	0.239537
YBL026W	0.7867	0.66925	-0.11745	66	33.68	27.02	0.69	0.410091
YBR151W	-0.20691	-0.09332	0.11359	148	12.47	11.95	0.03	0.548685
YCR065W	-0.42886	-0.45427	-0.02541	89	13.79	16.18	0.14	0.297353
YJL096W	0.1042	0.40414	0.29994	32	4.19	2.83	-0.29	0.265876
YNL125C	-0.9107	-0.66133	0.24938	20	5.26	7.81	0.05	0.677515
YJL186W	0.15737	0.1607	0.00333	20	8.7	0.79	0.44	0.398236
YGL070C	1.23834	1.29446	0.05612	23	23.44	9.74	0.75	0.443869
YMR256C	2.33243	2.64385	0.31143	27	13.63	25.81	0.02	0.803582
YMR049C	0.47201	0.69196	0.21995	37	0.1	6.96	-0.02	0.222523
YOR265W	1.47498	1.37093	-0.10405	32	32.34	18.15	0.5	0.455006
YOR207C	-0.93392	-0.93112	0.0028	26	6.05	6.42	-0.04	0.701062
YGL111W	0.40272	0.04368	-0.35903	20	16.43	12.96	0.55	0.366888
YKL098W	-1.75568	-1.23535	0.52033	36	4.22	14.92	0	0.367654
YGL023C	-0.5744	-0.48275	0.09165	32	3.04	5.48	0.01	NA
YNL053W	-0.48714	-0.71156	-0.22442	330	9.55	15.2	0.01	0.227891
YPL215W	0.25028	0.43361	0.18334	25	6.31	8.16	0.16	0.253471
YOR046C	0.54258	0.49603	-0.04656	34	5.19	5.22	0.5	0.385689
YDR496C	0.46801	0.77541	0.3074	39	9.35	-3.1	0.03	0.473491
YHR078W	-1.53844	-1.51209	0.02635	40	11.86	-14.28	0.47	0.265897
YKL144C	0.28953	0.7519	0.46237	63	1.39	-1.14	0.12	0.449796
YHR047C	-0.13828	-0.23228	-0.094	51	17.02	16.95	0.37	0.490022
YMR127C	-1.36901	-0.7032	0.66581	104	2.26	1.9	-0.1	0.814572
YBR056W	-0.11456	0.08909	0.20365	43	22.91	10.58	0.33	0.462074
YPR127W	0.05301	0.106	0.05299	115	7.22	9.95	0.02	0.816093
YOR359W	0.04976	0.27621	0.22645	98	23.31	12.08	0.19	0.4216
YGR204W	0.25131	0.24989	-0.00142	34	1.7	40.69	-0.12	0.644528
YFR031C-A	0.926	0.90412	-0.02188	27	3.99	-3.03	0.16	0.551421
YOL036W	-1.40138	-0.83728	0.5641	389	13.4	17.85	0.16	0.328114
YCL028W	1.15535	1.19033	0.03499	24	25.92	6.41	0.57	0.560992
YDR221W	-0.46849	-0.51076	-0.04227	25	-6.27	7.6	-0.28	0.325711
YML127W	0.23766	0.35918	0.12152	50	-1.89	-3.13	-0.3	0.368976
YOL103W	-1.49279	-1.5767	-0.08391	207	36.45	5.78	0.04	0.374797
YGR214W	1.14294	1.17988	0.03694	22	-30.81	1.05	-1.14	0.49305
YNL326C	-0.47627	-0.29817	0.17809	51	14.28	5.06	-0.15	0.359361
YMR310C	-0.48893	-0.76678	-0.27785	30	20.11	11.39	0.42	0.219412
YER159C	0.24736	0.82361	0.57625	169	14.8	17.64	0.05	0.430113
YOR002W	-0.50293	-0.519	-0.01607	41	47.28	41.3	0.96	0.545362
YLR201C	0.93943	0.93617	-0.00326	50	6.06	12.83	0.06	NA
YNL264C	0.32788	0.42841	0.10053	41	2.35	13.53	-0.12	NA
YKL045W	0.42406	0.04914	-0.37492	62	4.28	-1.71	0.1	0.505436
YDR222W	0.24813	0.59312	0.345	72	7.53	5.02	-0.14	0.438552
YNR027W	-0.75053	-0.44139	0.30914	34	6.78	2.59	0.04	0.280575
YDL097C	0.57209	0.53737	-0.03472	43	-4.51	11.68	-0.36	0.439471
YDL103C	0.99441	1.11842	0.12401	58	1.43	14.9	-0.36	0.603365
YOR185C	1.06477	0.97221	-0.09256	353	19.18	7.01	0.01	0.500171
YGR135W	0.35099	0.4063	0.05531	62	32.65	25.12	0.17	0.648132
YKL069W	0.41978	0.41418	-0.0056	31	-1.07	14.2	-0.15	0.424137
YKL213C	-0.25847	-0.32346	-0.06499	36	9.09	1.09	0.02	0.228004
YJR144W	0.24624	0.34891	0.10268	23	7.45	-7.66	0.24	0.323212
YIL143C	-0.30139	-0.23929	0.0621	34	10.33	10.6	0.2	0.473033
YLR089C	-0.03036	0.11151	0.14187	318	24.58	7.15	0.14	0.504519
YLR287C	0.24572	0.48162	0.2359	69	4.63	2.69	-0.25	0.851457
YGR195W	0.25455	0.29015	0.0356	105	29.9	6.96	0.44	0.329881
YGR277C	0.29442	0.37545	0.08103	20	-8.73	2.3	-0.38	0.517502
YBR234C	0.26388	0.31839	0.05451	48	7.36	16.06	-0.03	0.383672
YPL053C	0.08441	0.13371	0.0493	70	18.01	11.94	0.19	0.344755
YGL255W	0.14128	-0.03082	-0.1721	39	-5.14	0.24	-0.27	0.317944
YJR085C	0.13107	0.22802	0.09695	25	13.48	20.9	-0.17	0.406188
YIL154C	0.97653	0.72729	-0.24924	20	-1.34	-2.14	0.33	0.354444
YER081W	-0.07099	-0.74403	-0.67304	202	12.42	9.91	0.02	0.554494
YKL160W	-0.22656	-0.44048	-0.21392	20	-6.06	-9.47	0.05	0.371969
YJR073C	0.73878	0.39456	-0.34421	32	7.96	-2.72	0.44	0.324348
YPL206C	0.58242	0.49481	-0.08761	61	18.86	12.48	0.16	0.389404
YPL221W	-0.98597	-0.91681	0.06915	22	-48.44	2.76	-1.28	0.426659
YAR028W	0.34165	0.60097	0.25932	49	9.03	15.8	-0.1	0.320387
YER048W-A	0.74474	0.91477	0.17004	70	2.24	-13.5	-0.08	0.596891
YGR103W	0.33735	0.33635	-0.001	20	10.81	21.12	0.38	0.448849
YML008C	0.41706	0.39877	-0.0183	36	12.16	-8.49	-0.11	0.490115
YNR021W	0.42863	0.39554	-0.03308	22	13.32	8.52	0.54	0.686051
YNL177C	0.26054	0.61577	0.35523	32	17.72	-6.06	0.16	0.434945
YLR017W	0.32065	0.37133	0.05069	37	7.64	8.15	-0.03	NA
YER050C	1.1578	1.31217	0.15437	33	4.03	4.96	-0.15	0.258707
YNL178W	0.76388	0.81107	0.04719	21	9.05	-9.59	-0.32	0.700236
YHR005C-A	0.44562	0.85005	0.40443	37	7.6	31.48	-0.63	0.810068
YMR099C	0.7662	0.89308	0.12688	25	0.21	-22.58	-0.19	0.518999
YLR301W	1.16064	1.35973	0.19909	40	10	4.37	0.11	0.507238
YGR211W	0.85496	0.88637	0.03141	59	13.6	-5.57	0.28	0.50144
YDR172W	0.1021	0.34843	0.24633	38	31.17	26.58	0.63	0.624725
YDR232W	-0.05924	-0.12771	-0.06847	229	22.53	13.88	0.17	0.312157
YDR502C	0.76049	0.74077	-0.01973	33	17.74	30.34	0.11	0.55737
YOR122C	0.97879	0.85717	-0.12162	38	6.81	7.97	-0.14	0.597258
YER083C	0.99658	0.92019	-0.0764	20	-0.51	10.43	0.13	0.610994
YHR026W	0.09526	-0.23086	-0.32612	120	53.28	-4.23	0.83	0.371498
YGR209C	1.29249	1.39835	0.10586	38	20.18	32.4	0.33	0.582117
YFL044C	0.33563	0.75611	0.42048	22	-4.76	-14.92	0.25	0.49271
YLR060W	0.34367	0.24893	-0.09474	188	36.04	31.64	0.07	0.45737
YBR286W	0.37885	0.42537	0.04652	34	19.29	17.74	-0.1	0.412164
YDR064W	1.155	1.35805	0.20305	22	21.22	31.59	-0.35	0.675687
YDR385W	0.33907	0.29172	-0.04736	29	21.85	72.67	-0.56	0.561281
YOL021C	-0.07911	-0.07842	0.00068	30	10.9	6.81	0.36	0.627034
YDL066W	0.22995	0.22933	-0.00061	21	16.6	11.56	-0.03	0.378843
YKR059W	0.62187	0.51513	-0.10674	20	-1.54	29.18	0.28	0.750883
YMR235C	0.19992	0.21617	0.01625	26	30.7	25.72	0.81	0.535961
YNL134C	0.95699	1.00716	0.05017	68	10.75	25.66	-0.09	0.469311
YGL106W	1.25369	1.34848	0.09478	20	16.92	10.4	0.32	0.719994
YPR041W	0.97592	0.99259	0.01668	75	22.98	17.6	0.18	0.750883
YDR524C-B	1.42715	1.36686	-0.06029	25	11.44	42.48	-0.09	0.544172
YPL271W	1.07131	1.06566	-0.00566	24	2.78	4.84	0.47	0.743509
YIL018W	0.76264	0.6884	-0.07424	27	-2.96	10.11	0.63	0.586016
YFR032C-A	1.19295	0.95788	-0.23507	335	59.48	101.79	0.03	0.633705
YJL189W	1.40514	1.75975	0.3546	28	106.57	104.52	1.56	0.746422
YDR487C	0.66789	0.6727	0.0048	58	36.51	15.09	-0.11	0.606884
YJR123W	0.72378	0.77925	0.05547	38	37.31	18.07	-0.38	0.791603
YPL086C	0.15649	0.07317	-0.08332	27	7.28	1.49	0.12	0.871606
YNL015W	1.63602	1.69076	0.05474	34	-5.97	-3.38	-0.47	0.592011
YML009C	0.41595	0.29736	-0.1186	31	8.22	0.61	0.35	0.401439
YDR233C	0.87015	0.90514	0.03498	28	74.3	73.34	0.59	0.593976
YLL014W	0.80929	0.97368	0.16439	21	-11.16	9.25	-1.21	0.47356
YIL016W	0.21258	0.52023	0.30766	19	22.1	6.46	0.52	0.467347
YHR123W	0.14798	-0.06023	-0.20821	37	7.03	24.23	-0.14	0.550234
YLR231C	0.4455	0.42326	-0.02224	29	16.09	12.23	-0.1	0.39216
YDL235C	0.95062	0.92611	-0.02451	101	33.7	47.37	0.23	0.851457
YDR210W	1.55188	1.61264	0.06076	35	-9.51	28.39	-1.07	0.331464
YNR035C	0.70693	0.63789	-0.06904	22	40.45	41.51	0.9	0.418258
[truncated: 643 more rows]

## Sheet: CDS_RPF_Change
YORF	gene_name	ΔRPF_R13P(log2)	padj
YOL143C	RIB4	1.78289	3.67063e-60
YKL216W	URA1	1.27685	1.7495e-35
YAR050W	FLO1	3.02322	1.84556e-23
YEL021W	URA3	1.44048	1.15537e-20
YLR398C	SKI2	-1.31717	2.88036e-18
YCR005C	CIT2	-1.27425	1.81893e-17
YGL255W	ZRT1	-2.10741	4.37943e-17
YKL175W	ZRT3	-1.09965	6.74782e-16
YAL063C	FLO9	2.63127	2.59193e-14
YNL244C	SUI1	-1.08152	4.38646e-14
YOL126C	MDH2	1.20091	5.80792e-14
YMR251W-A	HOR7	0.716142	4.54521e-12
YEL071W	DLD3	-0.960182	4.69715e-12
YBR043C	QDR3	1.2277	1.7568e-11
YLR420W	URA4	0.898931	1.45036e-10
YHR087W	RTC3	0.919725	8.02984e-10
YOL112W	MSB4	1.20662	1.9748e-09
YFL007W	BLM10	-0.845561	5.70059e-09
YPL137C	GIP3	-0.978639	8.73623e-09
YDR408C	ADE8	0.770937	6.02617e-08
YJL153C	INO1	-1.42416	6.02617e-08
YBL030C	PET9	0.606939	1.11903e-07
YJL056C	ZAP1	-1.09226	3.5895e-07
YCL018W	LEU2	-0.534816	4.53057e-07
YOL154W	ZPS1	-2.90358	1.20065e-06
YML059C	NTE1	-0.857949	1.65616e-06
YER150W	SPI1	0.979773	2.48183e-06
YDR384C	ATO3	-1.06838	2.51684e-06
YER081W	SER3	-0.940746	2.71578e-06
YBR145W	ADH5	-0.875691	5.22611e-06
YER155C	BEM2	-0.628953	5.22611e-06
YKR093W	PTR2	-0.890313	5.22611e-06
YLL040C	VPS13	-0.539538	5.70332e-06
YJL212C	OPT1	-1.10615	7.56221e-06
YGR157W	CHO2	-0.559797	1.00662e-05
YOR306C	MCH5	-1.43711	1.00662e-05
YFL014W	HSP12	1.31706	1.26622e-05
YDR502C	SAM2	-0.558244	1.42968e-05
YPL274W	SAM3	-0.702132	1.76065e-05
YJL079C	PRY1	0.718015	2.88779e-05
YJL172W	CPS1	-0.806406	3.01633e-05
YKL109W	HAP4	0.680087	3.76273e-05
YGL206C	CHC1	-0.462724	4.8119e-05
YOR153W	PDR5	-0.707766	5.09451e-05
YBR074W		-0.750413	5.57032e-05
YHR211W	FLO5	1.50586	6.65346e-05
YMR319C	FET4	-1.28266	7.32525e-05
YBR253W	SRB6	1.2556	8.75375e-05
YNL052W	COX5A	0.587879	8.75417e-05
YOR303W	CPA1	0.646981	0.000113582
YGL187C	COX4	0.590947	0.000124325
YJR073C	OPI3	-0.54018	0.000124325
YDR529C	QCR7	0.6604	0.000159366
YDR170C	SEC7	-0.445534	0.000242734
YFL031W	HAC1	0.651225	0.000261506
YPL265W	DIP5	-0.754468	0.000261506
YDR377W	ATP17	0.596921	0.000262788
YGL009C	LEU1	-0.438963	0.000262788
YJR077C	MIR1	0.503058	0.000262788
YLR286C	CTS1	0.439446	0.000322792
YHR028C	DAP2	-0.629897	0.000336695
YHR047C	AAP1	-0.545353	0.000375723
YDR261C	EXG2	-0.547558	0.000380718
YIR035C		0.542491	0.000380718
YDR036C	EHD3	-0.85368	0.000390748
YEL024W	RIP1	0.577793	0.000404757
YML081C-A	ATP18	0.616176	0.000479712
YLR106C	MDN1	-0.481896	0.000504256
YDR524C-B		0.589182	0.000506989
YKL015W	PUT3	-0.884795	0.000625299
YGR183C	QCR9	0.680655	0.000661708
YGL121C	GPG1	0.79334	0.000698561
YBR039W	ATP3	0.448397	0.000724857
YDR019C	GCV1	0.473662	0.000920639
YKL164C	PIR1	0.506858	0.000941665
YKL085W	MDH1	0.491864	0.000947514
YKR086W	PRP16	-0.957641	0.000975781
YML024W	RPS17A	0.438027	0.0010632
YHR072W-A	NOP10	0.492305	0.00121571
YHR179W	OYE2	-0.379167	0.00121571
YJR049C	UTR1	-0.754598	0.0012303
YBR069C	TAT1	-0.536554	0.00131943
YDR497C	ITR1	-0.465822	0.00143548
YHR051W	COX6	0.503392	0.00151076
YER005W	YND1	-0.928557	0.00172449
YGL016W	KAP122	-0.557406	0.00172449
YOL052C-A	DDR2	0.838233	0.00183792
YLR153C	ACS2	-0.395132	0.00196302
YDR011W	SNQ2	-0.617872	0.00201183
YAL044C	GCV3	0.393098	0.00207124
YPR036W-A		0.531239	0.00208893
YDR298C	ATP5	0.500108	0.00210303
YOL020W	TAT2	-0.681867	0.0024589
YDL075W	RPL31A	0.352732	0.00258077
YLR375W	STP3	0.671068	0.00258077
YER011W	TIR1	-1.13011	0.00261361
YMR142C	RPL13B	0.379454	0.00261361
YJR078W	BNA2	-0.87699	0.00276135
YPL095C	EEB1	0.823233	0.00291742
YHR001W-A	QCR10	0.705592	0.0029362
YEL053C	MAK10	-0.861443	0.00305907
YER159C	BUR6	0.769541	0.00310174
YLL041C	SDH2	0.596628	0.00310174
YMR243C	ZRC1	-0.473219	0.00310174
YOL140W	ARG8	-0.461366	0.00332328
YBL099W	ATP1	0.404378	0.0038255
YGL191W	COX13	0.454662	0.0045754
YOL130W	ALR1	0.595176	0.0047787
YJR005W	APL1	-0.698028	0.00488296
YCR008W	SAT4	-0.635576	0.00511271
YBL064C	PRX1	0.429618	0.00513332
YJR148W	BAT2	-0.469621	0.00525575
YMR002W	MIC17	0.425012	0.00549495
YBR235W		-0.677191	0.00552993
YDR447C	RPS17B	0.400267	0.00552993
YGL140C		-0.556011	0.00552993
YIL051C	MMF1	0.437856	0.00552993
YNL160W	YGP1	0.427526	0.00552993
YDR461W	MFA1	-0.570256	0.00579958
YDR073W	SNF11	0.860218	0.0062021
YGR286C	BIO2	-0.711976	0.0062021
YCL014W	BUD3	-0.529584	0.00621864
YDR148C	KGD2	0.419605	0.00623139
YDR205W	MSC2	-0.762944	0.00623139
YIL030C	SSM4	-0.536604	0.00623139
YMR080C	NAM7	-0.484878	0.00623139
YNL125C	ESBP6	0.584257	0.00623139
YPL268W	PLC1	-1.17483	0.00623139
YDL167C	NRP1	-0.639458	0.00645961
YDL133C-A	RPL41B	0.464424	0.00645961
YDR382W	RPP2B	0.345674	0.00645961
YLL048C	YBT1	-0.483579	0.00645961
YJL005W	CYR1	-0.509943	0.00715311
YGL135W	RPL1B	0.320858	0.00717688
YPL081W	RPS9A	0.394446	0.00717688
YFR019W	FAB1	-0.48737	0.00722873
YDR206W	EBS1	0.53836	0.0074633
YLR303W	MET17	-0.404792	0.0074633
YKR057W	RPS21A	0.408286	0.00753884
YDR457W	TOM1	-0.413723	0.00789147
YDR063W	AIM7	0.639351	0.00813504
YDR064W	RPS13	0.321794	0.00820474
YOR124C	UBP2	-0.47809	0.00830229
YDR464W	SPP41	-0.592729	0.008666
YOR081C	TGL5	-0.656151	0.00879261
YBR246W	RRT2	-0.730406	0.00909025
YEL034W	HYP2	0.357367	0.00909025
YNR058W	BIO3	-1.06736	0.00909025
YPL220W	RPL1A	0.309136	0.00909025
YPL092W	SSU1	-0.768839	0.00909025
YEL031W	SPF1	-0.461917	0.00993105
YFR033C	QCR6	0.476591	0.0101778
YLR395C	COX8	0.517448	0.0101778
YLL019C	KNS1	0.56867	0.0107226
YBR088C	POL30	0.462582	0.0108136
YDR276C	PMP3	0.41123	0.010847
YLR350W	ORM2	0.501035	0.010847
YLR448W	RPL6B	0.31195	0.010847
YML073C	RPL6A	0.306342	0.010847
YDR349C	YPS7	-0.558508	0.0109074
YHR005C-A	TIM10	0.529923	0.0110503
YBL017C	PEP1	-0.485898	0.0111142
YBL003C	HTA2	0.383036	0.0112474
YDL130W	RPP1B	0.36967	0.0117341
YKL190W	CNB1	0.547925	0.0119849
YKR054C	DYN1	-0.52497	0.0124106
YNL280C	ERG24	-0.503832	0.0124911
YKL209C	STE6	-0.503107	0.0125517
YKL064W	MNR2	0.505757	0.0125517
YOL121C	RPS19A	0.337391	0.0125936
YCL064C	CHA1	0.526773	0.0130302
YJR143C	PMT4	-0.392657	0.013577
YBL079W	NUP170	-0.500572	0.0142281
YNL208W		0.442135	0.0144242
YAL002W	VPS8	-0.712546	0.0145759
YDL083C	RPS16B	0.329932	0.0145759
YPL177C	CUP9	0.522971	0.0145759
YDL081C	RPP1A	0.333216	0.0148579
YMR190C	SGS1	-0.7129	0.0148579
YLL027W	ISA1	0.513169	0.0151035
YOR299W	BUD7	-0.585494	0.0152162
YKL127W	PGM1	-0.386341	0.015698
YBR092C	PHO3	-0.398951	0.0158219
YER024W	YAT2	-0.800707	0.0159483
YNL294C	RIM21	0.627617	0.0159483
YOR096W	RPS7A	0.308398	0.0166104
YGR209C	TRX2	0.366548	0.0168062
YJR046W	TAH11	-0.620907	0.0174267
YDL067C	COX9	0.515921	0.0174981
YIL015W	BAR1	-0.479708	0.0175254
YOR232W	MGE1	0.39401	0.0180888
YHL035C	VMR1	-0.862744	0.0192193
YOR191W	ULS1	-0.536838	0.0192193
YEL042W	GDA1	-0.502149	0.0200599
YOL077W-A	ATP19	0.561892	0.0208187
YPR035W	GLN1	-0.327901	0.0211499
YBR084W	MIS1	-0.451951	0.0217745
YDR525W-A	SNA2	0.531676	0.0217745
YFL045C	SEC53	0.301257	0.0217745
YPL078C	ATP4	0.447552	0.0217745
YPL004C	LSP1	0.326578	0.0217745
YKL028W	TFA1	-0.563733	0.0219996
YDL181W	INH1	0.565103	0.0227618
YKR022C	NTR2	1.03217	0.0234087
YER048C	CAJ1	0.362442	0.0238583
YMR143W	RPS16A	0.327033	0.0240725
YDL110C	TMA17	0.500663	0.0245732
YGR244C	LSC2	0.382941	0.0248858
YOR369C	RPS12	0.300548	0.0248858
YOL039W	RPP2A	0.351199	0.0248858
YLL050C	COF1	0.291335	0.0253889
YMR136W	GAT2	0.491364	0.0254995
YGL071W	AFT1	0.582515	0.0255085
YNL157W	IGO1	0.611905	0.0269563
YBR118W	TEF2	0.294263	0.0273863
YDL082W	RPL13A	0.309797	0.0273863
YFR022W	ROG3	0.770924	0.0273863
YNL255C	GIS2	0.354713	0.0273863
YML079W		0.457824	0.0275169
YPR069C	SPE3	-0.340438	0.0275553
YLR168C	UPS2	0.610433	0.0281465
YBR205W	KTR3	-0.400439	0.0292116
YGL088W		0.443331	0.0292116
YNL024C-A	KSH1	0.569208	0.0292116
YOL040C	RPS15	0.285895	0.0292116
YPL160W	CDC60	-0.379075	0.0292116
YDL192W	ARF1	0.303568	0.0295865
YIL121W	QDR2	-0.417309	0.0299239
YPR080W	TEF1	0.292927	0.0299321
YPR132W	RPS23B	0.326261	0.0299321
YDR093W	DNF2	-0.475879	0.030375
YLR389C	STE23	-0.367306	0.030375
YGR097W	ASK10	-0.436258	0.0308561
YKL129C	MYO3	-0.422735	0.0316396
YJR132W	NMD5	-0.415426	0.0316404
YDR248C		0.680377	0.033345
YHR050W	SMF2	-0.536545	0.033345
YOR296W		-0.686159	0.0334623
YDL061C	RPS29B	0.355449	0.0343225
YNL121C	TOM70	-0.477492	0.0348583
YDL042C	SIR2	-0.626363	0.0355166
YOR320C	GNT1	-0.57586	0.0355166
YBL071W-A	KTI11	0.615555	0.0359149
YGR105W	VMA21	0.613922	0.0359149
YLR114C	AVL9	-0.535496	0.0359149
YLR342W	FKS1	-0.390309	0.0364566
YNL085W	MKT1	-0.354618	0.0373915
YOR161C	PNS1	0.532195	0.0380022
YPR021C	AGC1	0.663686	0.0380022
YML075C	HMG1	-0.456595	0.0389959
YML017W	PSP2	-0.384939	0.0389959
YNL169C	PSD1	-0.474175	0.0389959
YFR006W		-0.448624	0.0390212
YBR287W		-0.421966	0.0398033
YPL244C	HUT1	-0.75376	0.0400052
YKR039W	GAP1	-0.573083	0.0411526
YMR122W-A		0.425066	0.04117
YML056C	IMD4	-0.388065	0.0421011
YNL135C	FPR1	0.34466	0.0421265
YML049C	RSE1	-0.529472	0.0424321
YBR133C	HSL7	-0.457195	0.042797
YDR007W	TRP1	-0.472107	0.042797
YDR301W	CFT1	-0.500472	0.0429148
YJL095W	BCK1	-0.560817	0.0429148
YLL031C	GPI13	-0.447913	0.0446344
YOR184W	SER1	-0.333339	0.0446344
YDR067C	OCA6	0.760501	0.0449637
YDR481C	PHO8	-0.432806	0.0453283
YHR099W	TRA1	-0.319575	0.0459804
YBR085C-A		0.411592	0.0461479
YGL068W	MNP1	0.407788	0.0461479
YMR162C	DNF3	-0.47087	0.0461479
YNL036W	NCE103	0.520367	0.047211
YKR044W	UIP5	-0.711142	0.047603
YLR097C	HRT3	0.712237	0.047603
YLR179C		-0.307974	0.0484287
YML063W	RPS1B	0.268114	0.0484287
YIR003W	AIM21	0.424429	0.0498624
YLR084C	RAX2	-0.47985	0.0498624
YDL014W	NOP1	0.300667	0.049981
YGL014W	PUF4	-0.374108	0.0504276
YCR061W		-0.477099	0.0515029
YBL045C	COR1	0.336268	0.0518386
YLR075W	RPL10	0.250686	0.0521272
YDR135C	YCF1	-0.334642	0.0522773
YCL005W-A	VMA9	0.354316	0.0524905
YGL122C	NAB2	0.330568	0.0540702
YMR207C	HFA1	-0.613285	0.0540702
YMR129W	POM152	-0.443525	0.0540702
YOR291W	YPK9	-0.469864	0.0540702
YPL135W	ISU1	0.403986	0.0540702
YOR346W	REV1	-0.570105	0.0546948
YER120W	SCS2	0.31667	0.0547704
YOR270C	VPH1	-0.334555	0.0552056
YBR243C	ALG7	-0.457312	0.0559595
YBR137W		0.409314	0.0559595
YOL109W	ZEO1	0.349774	0.056135
YJR121W	ATP2	0.256241	0.0563921
YNL075W	IMP4	0.452597	0.0563921
YNL172W	APC1	-0.488056	0.0581163
YJL136C	RPS21B	0.312828	0.0585543
YEL025C		-0.668372	0.0600069
YKL137W	CMC1	0.624234	0.0600069
YML035C	AMD1	-0.367855	0.060356
YFL028C	CAF16	0.48835	0.0608354
YDR119W	VBA4	-0.35809	0.0617382
YDR178W	SDH4	0.36067	0.0620058
YPL207W	TYW1	-0.497067	0.0626195
YPR187W	RPO26	0.369614	0.0630503
YDL184C	RPL41A	0.40279	0.0632223
YDR144C	MKC7	-0.426939	0.0632223
YJL094C	KHA1	-0.573555	0.0632223
YKL161C	KDX1	-0.553141	0.0632223
YPL271W	ATP15	0.404169	0.0632223
YDL170W	UGA3	-0.592997	0.0633692
YKL105C		-0.481975	0.0633692
YDR483W	KRE2	-0.31513	0.0639234
YBR023C	CHS3	-0.353796	0.0659186
YDL208W	NHP2	0.329744	0.066928
YDR387C		0.721965	0.0670741
YMR026C	PEX12	0.677946	0.0670741
YNL003C	PET8	0.573365	0.0670741
YBR109C	CMD1	0.326016	0.0678186
YLL026W	HSP104	-0.25946	0.0678428
YGL256W	ADH4	-1.39545	0.0679074
YBR029C	CDS1	-0.340312	0.0681399
YBR143C	SUP45	0.269909	0.0681399
YIL130W	ASG1	-0.430028	0.0681399
YJL051W	IRC8	-0.538709	0.0681399
YOR065W	CYT1	0.342346	0.0681399
YIL050W	PCL7	0.499964	0.0687975
YBR183W	YPC1	-0.556334	0.0692759
YEL011W	GLC3	-0.416416	0.0693237
YHR143W	DSE2	0.296991	0.0696176
YKL016C	ATP7	0.430827	0.0696176
YDR510W	SMT3	0.312659	0.0702339
YFR029W	PTR3	-0.550487	0.0702339
YHL024W	RIM4	0.459252	0.0702339
YJL207C	LAA1	-0.379272	0.0702339
YJL166W	QCR8	0.444089	0.0702339
YOR289W		0.728947	0.0702339
YLR388W	RPS29A	0.314643	0.0712581
YCL057C-A		0.395863	0.0718311
YGR281W	YOR1	-0.394787	0.0718311
YKL192C	ACP1	0.385917	0.0724988
YGL031C	RPL24A	0.245967	0.0746261
YPR020W	ATP20	0.500564	0.0746261
YIL157C	COA1	0.444422	0.074829
YAL029C	MYO4	-0.365664	0.075291
YGR111W		-0.504361	0.075291
YJL048C	UBX6	0.483187	0.075291
YNL162W	RPL42A	0.243275	0.075291
YDR508C	GNP1	-0.322957	0.0756302
YPR100W	MRPL51	0.554955	0.0769184
YLR371W	ROM2	-0.418485	0.0771375
YML072C	TCB3	-0.291811	0.0773081
YPL058C	PDR12	-0.32826	0.0773081
YEL060C	PRB1	0.286932	0.0773898
YJR085C		0.37522	0.0773898
YOR293W	RPS10A	0.319876	0.0773898
YPR133W-A	TOM5	0.42238	0.0773898
YDR513W	GRX2	0.336584	0.0774471
YFL033C	RIM15	-0.409387	0.0774471
YGR279C	SCW4	0.305038	0.0774471
YHR033W		0.641844	0.0774471
YKR036C	CAF4	-0.62022	0.0774471
YLR192C	HCR1	0.288385	0.0774471
YBL078C	ATG8	0.634693	0.0779948
YBR093C	PHO5	-0.3691	0.0791878
YGL076C	RPL7A	0.244211	0.0791878
YMR226C		0.273083	0.0791878
YKL033W	TTI1	-0.582661	0.0799695
YBR010W	HHT1	0.298796	0.0802308
YNL002C	RLP7	0.341391	0.0802308
YGR001C		0.415601	0.0805351
YGR167W	CLC1	0.302533	0.0805351
YLR189C	ATG26	0.436046	0.0805351
YER037W	PHM8	0.481334	0.0818176
YER069W	ARG5,6	-0.336648	0.0818176
YGR061C	ADE6	-0.338092	0.0818176
YGR207C		0.355103	0.0818176
YLR450W	HMG2	-0.458774	0.0818176
YMR261C	TPS3	-0.302039	0.0818176
YMR309C	NIP1	0.259731	0.0818176
YML058W	SML1	0.314955	0.0818176
YMR241W	YHM2	0.279206	0.0818176
YMR128W	ECM16	-0.418285	0.0818669
YKL006W	RPL14A	0.287716	0.0829986
YPR140W	TAZ1	-0.591663	0.0836987
YNL268W	LYP1	-0.352022	0.0838897
YGL092W	NUP145	-0.333386	0.084154
YDR418W	RPL12B	0.249656	0.0849254
YGR184C	UBR1	-0.306194	0.085302
YCR023C		0.601881	0.0854728
YCR017C	CWH43	-0.447169	0.0859833
YBL106C	SRO77	-0.859588	0.0868036
YJL065C	DLS1	0.530021	0.0868036
YMR089C	YTA12	-0.378618	0.0870057
YFL054C		0.669574	0.087682
YIL048W	NEO1	-0.394688	0.087682
YDR107C	TMN2	-0.505286	0.0878816
YGL125W	MET13	0.36389	0.0878816
YPR191W	QCR2	0.250144	0.0878816
YER124C	DSE1	0.325856	0.0880963
YGL254W	FZF1	0.744478	0.0885226
YPL141C	FRK1	-0.438991	0.0885226
YML103C	NUP188	-0.303499	0.0903209
YOL058W	ARG1	-0.298555	0.0903209
YDL191W	RPL35A	0.268835	0.0906015
YGR227W	DIE2	-0.496943	0.0906056
YLR207W	HRD3	-0.457098	0.0906129
YNL219C	ALG9	-0.389065	0.090756
YMR062C	ARG7	0.25862	0.0909056
YEL043W		-0.48204	0.0912514
YPL022W	RAD1	0.473158	0.0912719
YDL226C	GCS1	0.309571	0.0916824
YIL016W	SNL1	0.477859	0.0916824
YMR195W	ICY1	0.573075	0.0916824
YKL101W	HSL1	-0.347902	0.0936076
YLR024C	UBR2	-0.560261	0.0939801
YFL024C	EPL1	0.444957	0.094502
YFR047C	BNA6	0.341966	0.094502
YOL155C	HPF1	-0.321081	0.0948851
YNL302C	RPS19B	0.265657	0.0953231
YCL035C	GRX1	0.332057	0.0965719
YDR224C	HTB1	0.34409	0.0965719
YER056C	FCY2	-0.315205	0.0965719
YGR215W	RSM27	0.547527	0.0965719
YLR262C-A	TMA7	0.386264	0.0965719
YLR061W	RPL22A	0.235962	0.0965719
YMR031C		0.307635	0.0965719
YOR286W	RDL2	0.393934	0.0965719
YPR010C-A		0.483881	0.0968621
YER004W	FMP52	0.342152	0.0981305
YGL238W	CSE1	-0.318557	0.0981305
YGR037C	ACB1	0.290123	0.0990522
YGR014W	MSB2	-0.404522	0.099509
YGR065C	VHT1	-0.454293	0.0998369
YPL061W	ALD6	0.295053	0.100726
YLR305C	STT4	-0.336694	0.101147
YMR074C		0.340429	0.101419
YKL156W	RPS27A	0.266698	0.102252
YNL163C	RIA1	-0.416669	0.103429
YDL174C	DLD1	-0.448611	0.104843
YJR123W	RPS5	0.250966	0.10516
YHL001W	RPL14B	0.274385	0.10564
YER088C	DOT6	0.340293	0.105883
YOR207C	RET1	-0.325101	0.105883
YEL040W	UTR2	-0.330118	0.107949
YGL245W	GUS1	-0.225119	0.107976
YGR118W	RPS23A	0.289379	0.107976
YAL026C	DRS2	-0.368435	0.10839
YER158C		0.51611	0.10839
YLR332W	MID2	-0.448847	0.10839
YDL054C	MCH1	-0.43506	0.109845
YDL136W	RPL35B	0.255217	0.110313
YLL045C	RPL8B	0.236057	0.110792
YDR516C	EMI2	-0.363205	0.111038
YGL084C	GUP1	-0.413323	0.112229
YOR327C	SNC2	0.410168	0.112584
YKL184W	SPE1	-0.284043	0.113598
YNL065W	AQR1	0.483173	0.113858
YDR541C		0.644016	0.115198
YER074W-A	YOS1	0.44893	0.115221
YOR175C	ALE1	-0.384522	0.115221
YGR234W	YHB1	-0.269401	0.115443
YDL137W	ARF2	0.278158	0.115936
YER074W	RPS24A	0.246186	0.116261
YNL094W	APP1	0.552541	0.117598
YKL003C	MRP17	0.527011	0.117921
YGR081C	SLX9	0.46821	0.118606
YBR229C	ROT2	-0.32509	0.118659
YIL041W	GVP36	0.267728	0.118687
YGL055W	OLE1	0.283825	0.118812
YOR167C	RPS28A	0.307963	0.118812
YPR165W	RHO1	0.258064	0.119247
YMR013C	SEC59	-0.584825	0.121517
YLR294C		0.508517	0.121998
YBL001C	ECM15	0.353744	0.122972
YDR174W	HMO1	0.30812	0.122972
YKL163W	PIR3	0.266604	0.122972
YCR051W		0.353876	0.123168
YLR167W	RPS31	0.236699	0.123168
YOR109W	INP53	-0.294715	0.123483
YLR390W	ECM19	0.524929	0.124058
YGR217W	CCH1	-0.429815	0.124433
YBR140C	IRA1	-0.321909	0.127084
YER053C-A		0.541455	0.127887
YOR045W	TOM6	0.442165	0.128709
YDR420W	HKR1	-0.430476	0.129512
YCL045C	EMC1	-0.276579	0.129788
YDL166C	FAP7	0.435283	0.130153
YHR165C	PRP8	-0.370433	0.130153
YML031W	NDC1	-0.419772	0.130153
YLR347C	KAP95	-0.255606	0.130358
YLR052W	IES3	0.555458	0.131403
YGL037C	PNC1	0.270461	0.132197
YBL002W	HTB2	0.315434	0.133553
YNR036C	MRPS12	0.34571	0.133553
YOL059W	GPD2	-0.272548	0.134763
YCR004C	YCP4	0.258702	0.136275
YCR046C	IMG1	0.406331	0.136275
YLR038C	COX12	0.388407	0.136275
YPR149W	NCE102	0.260836	0.136275
YLR079W	SIC1	0.389012	0.136454
YKL013C	ARC19	0.301174	0.139299
YKR068C	BET3	0.419001	0.139299
YGR148C	RPL24B	0.22665	0.140102
YDR173C	ARG82	0.570662	0.141043
YKL210W	UBA1	-0.230127	0.141043
YNL186W	UBP10	0.31608	0.141043
YOR256C	TRE2	-0.407976	0.141043
YPR043W	RPL43A	0.256979	0.141043
YHR076W	PTC7	0.379738	0.142449
YFR055W	IRC7	0.388364	0.142511
YBR181C	RPS6B	0.216072	0.142872
YIL088C	AVT7	-0.389888	0.142872
YLR172C	DPH5	-0.275479	0.143009
YPL143W	RPL33A	0.250485	0.143009
YDL238C	GUD1	-0.805169	0.143793
YML111W	BUL2	-0.369287	0.143793
YDR335W	MSN5	-0.302066	0.143893
YJL076W	NET1	-0.244977	0.144439
YOR168W	GLN4	-0.231641	0.144439
YMR058W	FET3	0.28146	0.144716
YBL113C		-0.381884	0.146564
YPL169C	MEX67	-0.329077	0.149035
YDL022W	GPD1	0.239719	0.149715
YDR326C	YSP2	-0.329096	0.150308
YIL069C	RPS24B	0.243555	0.150539
YNL251C	NRD1	0.292577	0.151571
YNL058C		-0.289521	0.151654
YIL148W	RPL40A	0.254226	0.151702
YBR089C-A	NHP6B	0.387724	0.152593
YDL231C	BRE4	0.727604	0.152593
YDR055W	PST1	0.26211	0.152593
YLR099W-A		0.51568	0.152593
YLR352W		-0.533717	0.152593
YMR295C		0.333901	0.152593
YBR115C	LYS2	-0.263386	0.152703
YJL148W	RPA34	0.344686	0.153707
YPL133C	RDS2	0.588053	0.155793
YOL019W		-0.448897	0.155895
YJR033C	RAV1	-0.39398	0.156125
YLR083C	EMP70	-0.291928	0.156464
YER117W	RPL23B	0.223274	0.15648
YIL085C	KTR7	-0.442259	0.15648
YBR101C	FES1	0.338583	0.158339
YCR079W	PTC6	-0.626683	0.158339
YLR241W		-0.310891	0.158339
YOR030W	DFG16	-0.625411	0.158339
YKL141W	SDH3	0.27878	0.159527
YKL093W	MBR1	0.668537	0.159527
YGR233C	PHO81	-0.46209	0.160095
YKL056C	TMA19	0.203353	0.162368
YER017C	AFG3	-0.361568	0.164871
YML129C	COX14	0.432328	0.164871
YER015W	FAA2	0.685463	0.165644
YKR051W		-0.640449	0.165644
YDL027C		0.500703	0.166638
YOR129C	AFI1	-0.590141	0.166638
YPL240C	HSP82	-0.214139	0.166638
YPL198W	RPL7B	0.232622	0.166638
YLR454W	FMP27	-0.323103	0.167674
YDL097C	RPN6	0.234697	0.168571
YGR063C	SPT4	0.433875	0.168571
YEL054C	RPL12A	0.203543	0.169733
YPL090C	RPS6A	0.21169	0.169733
YMR066W	SOV1	-0.645177	0.170181
YGR125W		-0.355656	0.170706
YOR312C	RPL20B	0.217434	0.170706
YOR305W	RRG7	0.706612	0.171422
YNL054W	VAC7	-0.378994	0.171727
YOR326W	MYO2	-0.258985	0.171727
YGL106W	MLC1	0.275011	0.172583
YPL008W	CHL1	0.557093	0.172583
YCR037C	PHO87	-0.405768	0.173355
YEL006W	YEA6	-0.615601	0.175688
YDL004W	ATP16	0.292724	0.176619
YDR321W	ASP1	-0.231823	0.176619
YGR123C	PPT1	-0.285456	0.176619
YPL237W	SUI3	0.232851	0.176619
YGR029W	ERV1	0.442476	0.176632
YFR015C	GSY1	-0.316991	0.177947
YLR304C	ACO1	-0.235323	0.178996
YNL131W	TOM22	0.288865	0.179367
YNL123W	NMA111	-0.265638	0.179367
YPL037C	EGD1	0.210694	0.179367
YHR052W	CIC1	0.38364	0.180961
YBL088C	TEL1	-0.498299	0.180995
YNL271C	BNI1	-0.324268	0.180995
YIL162W	SUC2	-0.340322	0.18129
YJL176C	SWI3	0.338568	0.18135
YJL186W	MNN5	-0.281044	0.181884
YOR210W	RPB10	0.359597	0.182328
YGR019W	UGA1	-0.312252	0.182967
YLR214W	FRE1	-0.420765	0.182967
YOR230W	WTM1	-0.240043	0.182967
YER170W	ADK2	0.626323	0.182972
YER087C-B	SBH1	0.325175	0.183542
YGL104C	VPS73	-0.595176	0.183903
YKR082W	NUP133	-0.289936	0.185107
YPR159W	KRE6	-0.235323	0.185242
YCR067C	SED4	-0.352661	0.18526
YIL136W	OM45	0.317463	0.18526
YNL096C	RPS7B	0.234951	0.185878
YDR194C	MSS116	-0.288637	0.186075
YAL053W	FLC2	-0.237452	0.186337
YHR182W		-0.547547	0.186479
YOR176W	HEM15	-0.293139	0.186479
YER146W	LSM5	0.361243	0.186975
YBL087C	RPL23A	0.25628	0.18826
YBR163W	EXO5	-0.66607	0.18826
YDR429C	TIF35	0.257894	0.18826
YGR257C	MTM1	0.563975	0.18826
YKL096W-A	CWP2	0.549085	0.18826
YLR325C	RPL38	0.236585	0.18826
YMR242C	RPL20A	0.193335	0.18826
YNL178W	RPS3	0.185493	0.18826
YNR019W	ARE2	-0.333962	0.18826
YPL053C	KTR6	-0.304414	0.18826
YIL105C	SLM1	0.340437	0.189733
YHR141C	RPL42B	0.199058	0.189794
YPL232W	SSO1	0.316951	0.189794
YDR471W	RPL27B	0.210483	0.189992
YGR200C	ELP2	-0.294838	0.191652
YBR091C	TIM12	0.513089	0.191829
YNL006W	LST8	-0.464101	0.192449
YNL180C	RHO5	-0.364825	0.193193
YPL250C	ICY2	-0.36362	0.193953
YGL030W	RPL30	0.230315	0.195218
YDR381W	YRA1	0.253417	0.19553
YPR031W	NTO1	-0.546284	0.197318
YOR162C	YRR1	0.559543	0.197717
YAR042W	SWH1	-0.345198	0.19975
YDR322C-A	TIM11	0.395985	0.200525
YDL230W	PTP1	-0.457937	0.200571
YJR016C	ILV3	-0.28799	0.200792
YDR159W	SAC3	-0.470951	0.201666
YBR263W	SHM1	-0.236135	0.201762
YNL070W	TOM7	0.331468	0.201762
YOR377W	ATF1	-0.732617	0.201762
YFL025C	BST1	-0.471649	0.201932
YLR185W	RPL37A	0.222036	0.201932
YNL137C	NAM9	0.318206	0.201932
YLR333C	RPS25B	0.198365	0.202249
YGR068C	ART5	-0.454189	0.203439
YNR046W	TRM112	0.314989	0.203439
YOL138C	RTC1	-0.423743	0.203439
YOR057W	SGT1	0.390747	0.203439
YKR024C	DBP7	-0.363882	0.204803
YGR262C	BUD32	0.429423	0.205987
YDR500C	RPL37B	0.251079	0.206115
YHR021C	RPS27B	0.24174	0.206163
YBL027W	RPL19B	0.19124	0.208093
YDL078C	MDH3	0.303071	0.208093
YDR299W	BFR2	0.353729	0.208093
YEL022W	GEA2	-0.267488	0.208093
YFL049W	SWP82	-0.405193	0.208093
YGL257C	MNT2	0.434924	0.208093
YGL032C	AGA2	-0.41204	0.208093
YGR027C	RPS25A	0.199952	0.208093
YIL153W	RRD1	0.439854	0.208093
YJL050W	MTR4	-0.237359	0.208093
YJL016W		0.346434	0.208093
YLR056W	ERG3	-0.269086	0.208093
YLR234W	TOP3	-0.618712	0.208093
YML106W	URA5	0.217405	0.208093
YMR276W	DSK2	0.224905	0.208093
YNL069C	RPL16B	0.216456	0.208093
YOR116C	RPO31	-0.303658	0.208093
YPR023C	EAF3	0.341535	0.208093
YKL171W	NNK1	-0.542624	0.208317
YGL137W	SEC27	-0.228404	0.208526
YLR074C	BUD20	0.316683	0.208526
YLR421C	RPN13	0.307432	0.208526
YNL067W	RPL9B	0.211308	0.208526
YNL047C	SLM2	0.507429	0.208939
YOL142W	RRP40	0.350281	0.209139
YGL167C	PMR1	-0.324075	0.211139
YGR149W		-0.396722	0.211139
YBR151W	APD1	-0.316941	0.212423
YER098W	UBP9	0.546615	0.212423
YKL218C	SRY1	-0.334835	0.212423
YML131W		-0.396444	0.212423
YNR011C	PRP2	-0.441147	0.212985
YKL094W	YJU3	0.309159	0.213266
YCR076C		0.403424	0.213433
YGR282C	BGL2	0.20494	0.213433
YIL147C	SLN1	-0.368289	0.213433
YLR220W	CCC1	0.295431	0.213433
YMR135C	GID8	0.37404	0.213951
YDR395W	SXM1	-0.227166	0.214188
YKL196C	YKT6	0.27015	0.214188
YLR021W	IRC25	0.53246	0.214188
YBR055C	PRP6	-0.368896	0.214636
YBL007C	SLA1	-0.263521	0.217018
YJL171C		-0.224319	0.217913
YNL297C	MON2	-0.258627	0.219869
YPL118W	MRP51	0.323185	0.222657
YFL017W-A	SMX2	0.531873	0.222722
YJR138W	IML1	-0.415371	0.222722
YDL064W	UBC9	0.316358	0.223181
YPR032W	SRO7	-0.328549	0.223323
YIL052C	RPL34B	0.178072	0.223498
YMR092C	AIP1	-0.223536	0.223754
YJL192C	SOP4	-0.294481	0.22485
YFR049W	YMR31	0.388964	0.225305
YPR037C	ERV2	-0.423909	0.226099
YGL150C	INO80	-0.265718	0.22671
YNR067C	DSE4	-0.226235	0.226851
YLR257W		0.245494	0.227367
YOR341W	RPA190	-0.261285	0.227367
YDR225W	HTA1	0.256505	0.227928
YKL008C	LAC1	-0.266529	0.227987
YNL031C	HHT2	0.230507	0.227987
YGR008C	STF2	0.321353	0.228509
YHR018C	ARG4	0.197433	0.228509
YJL042W	MHP1	-0.324774	0.228509
YPR016C	TIF6	0.274658	0.228893
YHL023C	NPR3	-0.411528	0.230528
YLR259C	HSP60	0.203367	0.230528
YML128C	MSC1	0.2533	0.230965
YMR230W	RPS10B	0.23774	0.230965
YDL185W	VMA1	-0.215811	0.231469
YHL025W	SNF6	0.339788	0.231469
YJL177W	RPL17B	0.202953	0.231469
YLR043C	TRX1	0.220976	0.231469
YLR147C	SMD3	0.504145	0.231469
YGR070W	ROM1	-0.443323	0.232406
YOR321W	PMT3	-0.339953	0.232406
YGL021W	ALK1	-0.324766	0.232479
YDR122W	KIN1	-0.271816	0.23272
YDR434W	GPI17	-0.32384	0.232811
YMR205C	PFK2	-0.207143	0.232811
YOR201C	MRM1	-0.429231	0.232811
YOR099W	KTR1	-0.259029	0.232811
YHR010W	RPL27A	0.217345	0.233188
YKL142W	MRP8	0.276198	0.233188
YPL098C	MGR2	0.308881	0.233188
YBR068C	BAP2	-0.24893	0.233639
YBR173C	UMP1	0.330561	0.233639
YIL156W-B		0.363351	0.233639
YNL100W	AIM37	0.396415	0.233796
YPR184W	GDB1	-0.273295	0.234792
YBR114W	RAD16	0.427521	0.235777
YDR456W	NHX1	0.310438	0.235777
YHL030W	ECM29	-0.226545	0.236141
YDR357C	CNL1	0.478139	0.236859
YNL312W	RFA2	0.305117	0.236859
YOR149C	SMP3	-0.559152	0.237369
YMR247C	RKR1	-0.251844	0.237493
YLR138W	NHA1	-0.29411	0.237499
YPR086W	SUA7	0.291903	0.237499
YBR185C	MBA1	0.389993	0.238884
YBL041W	PRE7	0.221131	0.238884
YDR450W	RPS18A	0.199702	0.238884
YFR021W	ATG18	-0.372815	0.238884
YGL027C	CWH41	-0.310205	0.238884
YKL052C	ASK1	0.417583	0.238884
YLR384C	IKI3	-0.271352	0.238884
YML092C	PRE8	0.231825	0.238884
YOL062C	APM4	0.376584	0.238884
YOL034W	SMC5	-0.483001	0.238884
YCL041C		0.326064	0.239996
YGL054C	ERV14	0.261585	0.239996
YGL036W		-0.317898	0.239996
YOL110W	SHR5	-0.512887	0.239996
YCR073W-A	SOL2	0.282774	0.24436
YDR133C		0.313389	0.24436
YGR235C		0.317677	0.24436
YGR255C	COQ6	-0.318132	0.24436
YPL183C	RTT10	-0.328506	0.24436
YPL230W	USV1	0.512744	0.24436
YER119C	AVT6	-0.350318	0.244827
YJR063W	RPA12	0.342179	0.244827
YML025C	YML6	0.384	0.244827
YNL084C	END3	0.270844	0.2453
YJL158C	CIS3	0.234385	0.24611
YJL092W	SRS2	-0.381865	0.246184
YBR147W	RTC2	-0.445828	0.246195
YPL242C	IQG1	-0.264103	0.246195
YGR260W	TNA1	-0.267445	0.246492
YAL010C	MDM10	-0.51826	0.246527
YER056C-A	RPL34A	0.173639	0.246527
YPL183W-A	RTC6	0.376674	0.246605
YCL038C	ATG22	-0.374345	0.246644
YFR003C	YPI1	0.387592	0.246644
YGR253C	PUP2	0.220793	0.246644
YLR129W	DIP2	-0.277082	0.246644
YOL125W	TRM13	0.434961	0.246644
YDL025C	RTK1	-0.373001	0.247379
YDL180W		-0.465322	0.247379
YER174C	GRX4	0.393702	0.247379
YLR035C	MLH2	-0.641828	0.247379
YML126C	ERG13	-0.186956	0.247379
YNL300W	TOS6	0.332516	0.247379
YBR149W	ARA1	0.199921	0.247483
YDR441C	APT2	0.40622	0.24749
YGL077C	HNM1	-0.270777	0.248132
YHR202W		-0.525302	0.248132
YHR158C	KEL1	-0.292425	0.248147
YPL256C	CLN2	-0.261735	0.248367
YNL176C		-0.36516	0.249501
YOR215C	AIM41	0.316734	0.249501
YDR099W	BMH2	0.191429	0.250173
YDR309C	GIC2	0.243771	0.25073
YER145C	FTR1	0.257586	0.25073
YGR177C	ATF2	-0.37652	0.25073
YKL019W	RAM2	0.336483	0.25073
YMR161W	HLJ1	0.34318	0.25073
YOL086W-A		0.503103	0.25073
YPR065W	ROX1	0.286773	0.25073
YKL180W	RPL17A	0.182756	0.253922
YDL145C	COP1	-0.261979	0.25603
YHR216W	IMD2	-0.290673	0.257036
YAL024C	LTE1	-0.389432	0.257324
YJR001W	AVT1	-0.289014	0.257324
YDR463W	STP1	0.255563	0.257817
YER148W	SPT15	-0.285376	0.257817
YOL151W	GRE2	0.301493	0.257817
YLR438W	CAR2	-0.281949	0.258324
YMR311C	GLC8	0.315435	0.258324
YMR202W	ERG2	-0.243808	0.258984
YMR262W		-0.447436	0.258984
YNL088W	TOP2	-0.290542	0.258984
YOR066W	MSA1	-0.326789	0.258984
YOR298C-A	MBF1	0.197102	0.259746
YER062C	HOR2	0.244202	0.259927
YFL026W	STE2	-0.243759	0.259927
YGL123W	RPS2	0.18615	0.259927
YJL112W	MDV1	0.377684	0.259927
YLR427W	MAG2	0.378493	0.259927
YML105C	SEC65	0.29006	0.259927
YMR301C	ATM1	-0.328705	0.259927
YML001W	YPT7	0.231565	0.259927
YOL139C	CDC33	0.199821	0.259927
YPL174C	NIP100	0.60298	0.259927
YPR053C		0.298427	0.259927
YHR181W	SVP26	-0.328971	0.260156
YGR043C	NQM1	0.462357	0.262238
YNL056W	OCA2	0.403788	0.262553
YJL124C	LSM1	0.301701	0.262679
YOR285W	RDL1	0.279582	0.26385
YPR094W	RDS3	0.542046	0.265763
YML121W	GTR1	0.391385	0.265806
YMR199W	CLN1	-0.319748	0.265806
YGL018C	JAC1	0.454367	0.26603
YGL160W	AIM14	-0.340953	0.26603
YIL115C	NUP159	-0.209178	0.266614
YDL147W	RPN5	0.255229	0.267183
YGR034W	RPL26B	0.217353	0.267183
YDR443C	SSN2	-0.358746	0.267486
YGR248W	SOL4	0.357301	0.267937
YDR005C	MAF1	0.420601	0.268737
YMR054W	STV1	-0.295949	0.268818
YOL120C	RPL18A	0.179543	0.26894
YDR100W	TVP15	0.306224	0.269047
YDR337W	MRPS28	0.368291	0.269047
YGR185C	TYS1	0.173471	0.269047
YNL124W	NAF1	-0.373741	0.269047
YGL145W	TIP20	-0.385757	0.270596
YHR009C		0.250742	0.271802
YPL040C	ISM1	-0.428212	0.27286
YBR087W	RFC5	0.341443	0.272927
YHR138C		0.442708	0.272969
YJL170C	ASG7	-0.495477	0.272969
YBR084C-A	RPL19A	0.172674	0.273071
YBR282W	MRPL27	0.417719	0.273071
YNL177C	MRPL22	0.36545	0.274445
YOR246C		0.337341	0.276037
YHR008C	SOD2	0.215738	0.276245
YFR052W	RPN12	0.235283	0.276512
YIL002W-A		-0.429908	0.276512
YMR012W	CLU1	-0.170796	0.276716
YDR071C	PAA1	0.284139	0.277873
YML078W	CPR3	0.270988	0.279567
YOR358W	HAP5	0.503811	0.279882
YBL033C	RIB1	0.283932	0.280021
YER131W	RPS26B	0.207499	0.28015
YDR343C	HXT6	0.196129	0.281304
YDR405W	MRP20	0.340674	0.281564
YNL051W	COG5	0.422661	0.281564
YPL218W	SAR1	0.206492	0.281965
YKL157W	APE2	-0.218791	0.282916
YCR057C	PWP2	-0.281723	0.283752
YLR409C	UTP21	-0.275056	0.283752
YNL055C	POR1	0.219687	0.284197
YBL097W	BRN1	-0.45934	0.284244
YGR240C	PFK1	-0.226893	0.284463
YJL140W	RPB4	0.297654	0.284463
YLL054C		-0.537166	0.284463
YDR342C	HXT7	0.195895	0.284947
YGR108W	CLB1	0.269307	0.284947
YOR085W	OST3	-0.27124	0.284947
YPL112C	PEX25	0.31433	0.284947
YCL033C	MXR2	0.293054	0.285397
YGL022W	STT3	-0.24846	0.285397
YGR032W	GSC2	-0.267671	0.285397
YJR135W-A	TIM8	0.35355	0.285397
YKL150W	MCR1	0.210084	0.285397
YPR042C	PUF2	-0.276669	0.285397
YPR052C	NHP6A	0.263607	0.285397
YEL032W	MCM3	-0.258352	0.288586
YEL026W	SNU13	0.236184	0.288874
YJR104C	SOD1	0.201364	0.29037
YLR326W		-0.412044	0.291785
YJL084C	ALY2	-0.278111	0.291886
YJR140C	HIR3	-0.318477	0.291886
YJR015W		-0.276345	0.291886
YKL040C	NFU1	0.284847	0.291886
YNR030W	ALG12	-0.268827	0.291886
YPR113W	PIS1	0.228496	0.291886
YLR368W	MDM30	-0.524244	0.292487
YIL133C	RPL16A	0.17526	0.293045
YJL168C	SET2	-0.338226	0.293045
YMR130W		0.431274	0.293474
YGL062W	PYC1	-0.26742	0.294878
YJR137C	MET5	-0.295555	0.294878
YPR107C	YTH1	0.462352	0.294878
YLR441C	RPS1A	0.176467	0.295714
YJL006C	CTK2	0.415408	0.2964
YER095W	RAD51	0.255232	0.296806
YHR089C	GAR1	0.230298	0.298356
YBR203W	COS111	-0.37939	0.298728
YMR259C		-0.292773	0.298728
YNL218W	MGS1	-0.47071	0.29954
YDL124W		0.188132	0.301071
YDR466W	PKH3	-0.362663	0.301071
YPR115W	RGC1	0.300338	0.301071
YNL242W	ATG2	-0.310188	0.301263
YGR132C	PHB1	0.214088	0.302093
YIL056W	VHR1	-0.34703	0.302093
YLR121C	YPS3	-0.270587	0.302093
YBL057C	PTH2	0.326129	0.303132
YHL011C	PRS3	0.210286	0.304309
YMR097C	MTG1	0.445743	0.304593
YOR027W	STI1	-0.168958	0.304785
YER080W	AIM9	-0.233695	0.305399
YBR249C	ARO4	0.185783	0.306095
YBR256C	RIB5	0.235175	0.306095
YDR004W	RAD57	-0.555905	0.306095
YLR430W	SEN1	-0.239777	0.306095
YNR049C	MSO1	0.399298	0.306095
YBR132C	AGP2	-0.345781	0.30651
YJL062W	LAS21	-0.288774	0.308164
YGR214W	RPS0A	0.187039	0.311455
YJR103W	URA8	-0.272449	0.311455
YLR247C	IRC20	-0.313784	0.311455
YKR094C	RPL40B	0.220348	0.311541
YMR064W	AEP1	0.45871	0.313714
YDR181C	SAS4	0.463222	0.313943
YPL173W	MRPL40	0.369129	0.313991
YHR188C	GPI16	-0.245635	0.314102
YOL060C	MAM3	-0.262365	0.314102
YOR091W	TMA46	0.233287	0.314102
YBL050W	SEC17	0.23315	0.314576
YDR180W	SCC2	-0.325305	0.314967
YDR227W	SIR4	-0.319505	0.314967
YGL147C	RPL9A	0.156165	0.314967
YGL070C	RPB9	0.392634	0.314967
YMR145C	NDE1	0.234177	0.31542
YOR353C	SOG2	-0.32188	0.316174
YKL204W	EAP1	0.256843	0.318243
YPL249C-A	RPL36B	0.195379	0.322673
YIL053W	RHR2	-0.172007	0.32438
YJL121C	RPE1	0.206781	0.32438
YJR041C	URB2	-0.252445	0.32438
YML007W	YAP1	0.256322	0.32438
YOL005C	RPB11	0.261207	0.324497
YPR164W	MMS1	-0.342959	0.324497
YNL257C	SIP3	0.294622	0.325995
YLR109W	AHP1	0.170823	0.326363
YJL063C	MRPL8	0.304912	0.327014
YDR369C	XRS2	-0.522044	0.327164
YAL043C	PTA1	0.253799	0.327483
YBR283C	SSH1	-0.190808	0.329704
YGL209W	MIG2	0.311219	0.329704
YGL237C	HAP2	0.496811	0.331773
YML026C	RPS18B	0.179448	0.332293
YPL101W	ELP4	0.314322	0.333693
YDR320C	SWA2	0.282204	0.336386
YNL115C		-0.258187	0.336386
YBR189W	RPS9B	0.16752	0.33647
YHR192W		-0.379421	0.33647
YOR254C	SEC63	-0.201763	0.33647
YOR336W	KRE5	-0.248034	0.33647
YLR340W	RPP0	0.212185	0.337419
YPR198W	SGE1	-0.344334	0.337708
YGR245C	SDA1	-0.244363	0.337834
YOL036W		0.277638	0.338302
YER173W	RAD24	-0.493044	0.339078
YJR089W	BIR1	0.412497	0.340225
YFL044C	OTU1	0.341234	0.34036
YIL062C	ARC15	0.248985	0.341092
YNR065C		-0.377164	0.341557
YOR036W	PEP12	0.390806	0.343986
YOR006C	TSR3	0.353858	0.344415
YKL004W	AUR1	-0.295406	0.344631
YAL003W	EFB1	0.172868	0.344705
YLR137W		0.413314	0.345474
YCL025C	AGP1	-0.258228	0.345926
YNL250W	RAD50	-0.460114	0.346994
YPR098C		0.295546	0.346994
YPR058W	YMC1	-0.275362	0.346994
YKR016W	FCJ1	0.245525	0.347469
YNL321W	VNX1	-0.280967	0.347469
YKL172W	EBP2	0.234843	0.347663
YOR309C		0.36963	0.348932
YBR252W	DUT1	0.25149	0.349813
YMR256C	COX7	0.32698	0.350866
YDL040C	NAT1	-0.193328	0.351304
YDR234W	LYS4	-0.228267	0.351304
YGR078C	PAC10	0.247469	0.351304
YCL040W	GLK1	0.174709	0.351441
YOR367W	SCP1	-0.321504	0.351441
YPL153C	RAD53	0.423359	0.351441
YJL093C	TOK1	0.384306	0.351744
YDL095W	PMT1	-0.222474	0.35178
YFL039C	ACT1	0.168161	0.35178
YNL221C	POP1	-0.282034	0.35178
YHR162W		0.187179	0.351918
YKR096W		-0.259544	0.351918
YDR175C	RSM24	0.345779	0.353571
YMR272C	SCS7	0.204616	0.353897
YGR169C	PUS6	0.476408	0.354485
YPL006W	NCR1	-0.232368	0.354485
YJR109C	CPA2	-0.218517	0.35576
YBR241C		-0.309718	0.355932
YDR231C	COX20	0.330825	0.357346
YMR171C	EAR1	0.346673	0.357447
YBR061C	TRM7	0.265855	0.357455
YDR328C	SKP1	0.218781	0.357455
YOR234C	RPL33B	0.187038	0.357599
YFR004W	RPN11	0.221751	0.357812
YHL039W	EFM1	-0.279739	0.359746
YOR165W	SEY1	-0.228972	0.359832
YDR406W	PDR15	0.323981	0.360027
YLR266C	PDR8	-0.474039	0.360027
YCR071C	IMG2	0.383129	0.360934
YJL190C	RPS22A	0.165757	0.360934
YLR173W		-0.335684	0.360934
YMR231W	PEP5	-0.320164	0.360934
YNR008W	LRO1	-0.248866	0.360934
YDR518W	EUG1	-0.233768	0.362949
YGR007W	ECT1	-0.353285	0.362949
YML125C	PGA3	-0.247395	0.362949
YOL133W	HRT1	0.353476	0.363574
YDR398W	UTP5	-0.253104	0.365504
YDR238C	SEC26	-0.176212	0.366593
YGR266W		-0.2721	0.366593
YKL146W	AVT3	-0.263688	0.366593
YOR046C	DBP5	-0.179313	0.366593
YPL129W	TAF14	0.235808	0.366593
YBR017C	KAP104	-0.213076	0.367055
YDL048C	STP4	0.322414	0.367055
YDR347W	MRP1	0.271653	0.367055
YGL189C	RPS26A	0.163743	0.367055
YLR175W	CBF5	0.177103	0.367055
YDL052C	SLC1	-0.224103	0.367861
YER091C	MET6	-0.203994	0.367861
YIR002C	MPH1	-0.389968	0.367861
YBR222C	PCS60	-0.210387	0.368226
YDL157C		0.294694	0.368437
YKL205W	LOS1	-0.253627	0.368437
YNL200C		0.278755	0.369971
YDL197C	ASF2	-0.565818	0.370334
YER094C	PUP3	0.194503	0.370334
YBR077C	SLM4	0.320297	0.371113
YOR071C	NRT1	-0.330029	0.371113
YJL102W	MEF2	-0.36059	0.372035
YOL081W	IRA2	-0.240383	0.372035
YFR018C		-0.288967	0.372731
YLR126C		0.413848	0.372736
YNL301C	RPL18B	0.192011	0.373531
YOR363C	PIP2	0.348872	0.373531
YGR145W	ENP2	-0.251665	0.374626
YDR378C	LSM6	0.340496	0.375695
YBR081C	SPT7	-0.277588	0.376135
YDL013W	SLX5	-0.351306	0.376135
YGR130C		0.223133	0.376135
YDR069C	DOA4	0.318189	0.376311
YDR370C		-0.476486	0.376311
YPL225W		0.217736	0.376311
YGR150C	CCM1	-0.418675	0.376352
YLR194C		0.205916	0.376677
YDR322W	MRPL35	0.296455	0.377211
YEL044W	IES6	0.28199	0.377211
YPR117W		0.350585	0.377211
YHR038W	RRF1	0.423677	0.378625
YKL005C	BYE1	0.338867	0.378625
YKL108W	SLD2	-0.457639	0.378625
YLR351C	NIT3	0.202041	0.378625
YMR090W		0.410519	0.378753
YDR150W	NUM1	-0.159728	0.380749
YKR037C	SPC34	0.442986	0.381192
YOR322C	LDB19	-0.293587	0.381192
YAL016W	TPD3	0.187264	0.382307
YFL038C	YPT1	0.167017	0.382307
YCR028C-A	RIM1	0.229651	0.383862
YNL167C	SKO1	-0.339684	0.383862
YIL011W	TIR3	-0.331431	0.384236
YNL080C	EOS1	-0.346543	0.384242
YML124C	TUB3	-0.232015	0.385179
YLR410W	VIP1	-0.202663	0.385743
YNL243W	SLA2	-0.171319	0.386423
YOL071W	EMI5	0.394982	0.386423
YPR079W	MRL1	-0.33309	0.386423
YBR046C	ZTA1	-0.29297	0.386715
YPR095C	SYT1	-0.333038	0.386715
YDR304C	CPR5	-0.188086	0.387936
YLR344W	RPL26A	0.163328	0.388448
YCR044C	PER1	-0.317724	0.389072
YDR388W	RVS167	0.170494	0.389072
YGR054W		-0.207016	0.389072
YOR156C	NFI1	-0.467301	0.389072
YGL186C	TPN1	-0.236965	0.389288
YGL116W	CDC20	-0.253958	0.389288
YMR229C	RRP5	-0.174928	0.389819
YPR084W		0.454435	0.389819
YDR038C	ENA5	-0.253199	0.38983
YDR045C	RPC11	0.361516	0.38983
YJL039C	NUP192	-0.187809	0.38983
YJL133W	MRS3	0.412841	0.38983
YKL165C	MCD4	-0.221241	0.38983
YLR310C	CDC25	-0.232052	0.38983
YLR435W	TSR2	0.265807	0.38983
YMR253C		0.312963	0.38983
YNR055C	HOL1	0.315609	0.38983
YGR285C	ZUO1	0.170546	0.389843
YHR073W	OSH3	-0.243892	0.390906
YPL064C	CWC27	0.491698	0.390906
YGL232W	TAN1	0.304269	0.391081
YDL173W	PAR32	0.277425	0.391239
YHL007C	STE20	-0.251369	0.391239
YOR178C	GAC1	0.376449	0.391239
YER177W	BMH1	0.165846	0.391255
YGL181W	GTS1	0.231609	0.391746
YBR111C	YSA1	-0.199565	0.391824
YPL181W	CTI6	0.253462	0.39217
YHR090C	YNG2	0.397819	0.392225
YHR194W	MDM31	-0.434931	0.392876
YNR050C	LYS9	-0.169246	0.392876
YJL210W	PEX2	-0.416537	0.393299
YDL217C	TIM22	0.32419	0.394094
YKR003W	OSH6	0.256748	0.394316
YBL035C	POL12	0.282038	0.39495
YOR340C	RPA43	0.234312	0.39495
YGL049C	TIF4632	-0.224348	0.395305
YJR126C	VPS70	-0.282954	0.395806
YLR370C	ARC18	0.229871	0.396022
YLR438C-A	LSM3	0.286667	0.396022
YNL262W	POL2	-0.232656	0.396022
YOR151C	RPB2	-0.220235	0.396022
YOR221C	MCT1	-0.284146	0.396022
YAL015C	NTG1	-0.389135	0.396181
YKL039W	PTM1	-0.211355	0.396181
YPL226W	NEW1	-0.163866	0.396846
YBR022W	POA1	0.389801	0.397235
YFL004W	VTC2	-0.198035	0.397235
YKR066C	CCP1	0.165303	0.397235
YBR158W	AMN1	0.217781	0.39732
YKR081C	RPF2	0.229762	0.39732
YMR019W	STB4	0.332996	0.398339
YOL013C	HRD1	-0.353472	0.398359
YOR087W	YVC1	-0.245875	0.398641
YBR276C	PPS1	-0.323835	0.398841
YMR150C	IMP1	-0.364164	0.398841
YBL067C	UBP13	-0.297504	0.399015
YOR113W	AZF1	0.273332	0.399015
YDR445C		-0.658622	0.399929
YGL131C	SNT2	-0.337368	0.399929
YGL103W	RPL28	0.172242	0.399929
YML081W		-0.280727	0.399929
YOL004W	SIN3	-0.166409	0.399929
YOR145C	PNO1	0.211701	0.400225
YGR251W		0.422725	0.401335
YJL082W	IML2	-0.214076	0.401335
YOR276W	CAF20	0.174875	0.402002
YML012W	ERV25	0.179722	0.402271
YER105C	NUP157	-0.201919	0.402602
YGR074W	SMD1	0.356418	0.403198
YBR187W	GDT1	0.255258	0.403249
YHR143W-A	RPC10	0.242959	0.403249
YNR022C	MRPL50	0.370851	0.40337
YDR293C	SSD1	-0.179098	0.404288
YGL133W	ITC1	-0.264303	0.404292
YKL106W	AAT1	-0.28137	0.404292
YFR031C-A	RPL2A	0.17323	0.407147
YGL048C	RPT6	0.174424	0.407147
YLR193C	UPS1	0.302493	0.407147
YDL099W	BUG1	0.285523	0.409141
YPL067C		0.323705	0.409141
YNL098C	RAS2	-0.189874	0.411185
YBR169C	SSE2	0.185742	0.413441
YBR071W		0.260252	0.413441
YDR198C	RKM2	-0.415742	0.413441
YDR025W	RPS11A	0.154902	0.413441
YJL198W	PHO90	-0.255203	0.413441
YLR363C	NMD4	0.335587	0.413441
YML022W	APT1	0.200059	0.413441
YNL288W	CAF40	0.249681	0.413441
YOL055C	THI20	-0.296997	0.413441
YOR122C	PFY1	0.187622	0.413441
YOR172W	YRM1	-0.391173	0.413441
YJR048W	CYC1	0.22685	0.413896
YGL079W	KXD1	0.391163	0.413938
YHR004C	NEM1	-0.423036	0.413938
YHR006W	STP2	0.263079	0.413938
YJL122W	ALB1	0.281421	0.414278
YLR300W	EXG1	0.137873	0.415202
YPR048W	TAH18	-0.292765	0.415485
YLR009W	RLP24	0.213811	0.415838
YBR161W	CSH1	-0.335809	0.415933
YDL232W	OST4	0.331824	0.415933
YDR012W	RPL4B	0.178509	0.415933
[truncated: 3,867 more rows]
