# Supplementary material for: eIF1A residues implicated in cancer stabilize translation preinitiation complexes and favor suboptimal initiation sites in yeast
Source: eLife journal article supplement (doi:10.7554/elife.31250), 2017-12-05
Supplement: supp [file elife_poa_e31250_Supplementary_File_1.doc]

**Supplemental Material**

**for**

**eIF1A residues implicated in cancer stabilize translation preinitiation complexes and favor suboptimal initiation sites in yeast**

**Supplementary Tables**

**Table S1. Primers used for *TIF11* mutagenesis (with mutated nucleotides underlined).**

| Primer | Sequence (5’ to 3’) | Mutation |
| --- | --- | --- |
| tif11p.K3Efw | AAGTTCATCATGGGTGAGAAAAACACTAAAG | *tif11-K3E* |
| tif11p.K3Erev | CTTTAGTGTTTTTCTCACCCATGATGAACTT | *tif11-K3E* |
| tif11p.K4Dfw | TTCATCATGGGTAAGGACAACACTAAAGGTGGT | *tif11-K4D* |
| tif11p.K4Drev | ACCACCTTTAGTGTTGTCCTTACCCATGATGAA | *tif11-K4D* |
| tif11p.T6Dfw | ATGGGTAAGAAAAACGATAAAGGTGGTAAAAA | *tif11-T6D* |
| tif11p.T6Drev | TTTTTACCACCTTTATCGTTTTTCTTACCCAT | *tif11-T6D* |
| tif11p.T6Rfw | ATGGGTAAGAAAAACCGTAAAGGTGGTAAAAA | *tif11-T6R* |
| tif11p.T6Rrev | TTTTTACCACCTTTACGGTTTTTCTTACCCAT | *tif11-T6R* |
| tif11p.G8delfw | AAAAACACTAAAGGT(3ntdel)AAAAAAGGTAGAAGA | *tif11-G8* |
| tif11p.G8delrev | TCTTCTACCTTTTTT(3ntdel)ACCTTTAGTGTTTTT | *tif11-G8* |
| tif11p.R13Pfw | GGTGGTAAAAAAGGTCCAAGAGGTAAGAACGA | *tif11-R13P* |
| tif11p.R13Prev | TCGTTCTTACCTCTTGGACCTTTTTTACCACC | *tif11-R13P* |
| tif11p.G15Dfw | AAAAAGGTAGAAGAGATAAGAACGACTCTGA | *tif11-G15D* |
| tif11p.G15Drev | TCAGAGTCGTTCTTATCTCTTCTACCTTTTT | *tif11-G15D* |
| K7A-F | ATGGGTAAGAAAAACACTGCTGGTGGTAAAAAAGGTAGA | *tif11-K7A* |
| K7A-R | TCTACCTTTTTTACCACCAGCAGTGTTTTTCTTACCCAT | *tif11-K7A* |
| K7D-F | ATGGGTAAGAAAAACACTGATGGTGGTAAAAAAGGTAGA | *tif11- K7D* |
| K7D-R | TCTACCTTTTTTACCACCATCAGTGTTTTTCTTACCCAT | *tif11- K7D* |
| DG8G9-F | ATGGGTAAGAAAAACACTAAA(6ntdel)AAAAAAGGTAGAAGAGGT AAG | *tif11-G8G9* |
| DG8G9-R | CTTACCTCTTCTACCTTTTTT(6ntdel)TTTAGTGTTTTTCTTACCCAT | *tif11-G8G9* |
| K10A-F | AAAAACACTAAAGGTGGTGCTAAAGGTAGAAGAGGTAAG | *tif11-K10A* |
| K10A-R | CTTACCTCTTCTACCTTTAGCACCACCTTTAGTGTTTTT | *tif11-K10A* |
| K10D-F | AAAAACACTAAAGGTGGTGATAAAGGTAGAAGAGGTAAG | *tif11-K10D* |
| K10D-R | CTTACCTCTTCTACCTTTATCACCACCTTTAGTGTTTTT | *tif11-K10D* |
| R13A-F | AAAGGTGGTAAAAAAGGTGCTAGAGGTAAGAACGACTCT | *tif11-R13A* |
| R13A-R | AGAGTCGTTCTTACCTCTAGCACCTTTTTTACCACCTTT | *tif11-R13A* |
| R13D-F | AAAGGTGGTAAAAAAGGTGATAGAGGTAAGAA.CGACTCT | *tif11-R13D* |
| R13D-R | AGAGTCGTTCTTACCTCTATCACCTTTTTTACCACCTTT | *tif11-R13D* |
| R14A-F | GGTGGTAAAAAAGGTAGAGCTGGTAAGAACGACTCTGAC | *tif11-R14A* |
| R14A-R | GTCAGAGTCGTTCTTACCAGCTCTACCTTTTTTACCACC | *tif11-R14A* |
| R14D-F | GGTGGTAAAAAAGGTAGAGATGGTAAGAACGACTCTGAC | *tif11-R14D* |
| R14D-R | GTCAGAGTCGTTCTTACCATCTCTACCTTTTTTACCACC | *tif11-R14D* |
| K16A-F | AAAAAAGGTAGAAGAGGTGCTAACGACTCTGACGGTCCA | *tif11-K16A* |
| K16A-R | TGGACCGTCAGAGTCGTTAGCACCTCTTCTACCTTTTTT | *tif11-K16A* |
| K16D-F | AAAAAAGGTAGAAGAGGTGATAACGACTCTGACGGTCCA | *tif11-K16D* |
| K16D-R | TGGACCGTCAGAGTCGTTATCACCTCTTCTACCTTTTTT | *tif11-K16D* |

**Table S2. Ribosome profiling datasets used for uORF identification**

| Strain | Relevant genotype | Growth conditions | Source | GEO  Accession  Number |
| --- | --- | --- | --- | --- |
| ***tif11-R13P* experiment** | | | | |
| PMY337/PMY338 | *TIF11/SUI3* | SC, 30°C | This study | Pending |
| FZY010/FZY011 | *tif11-R13P/SUI3* | SC, 30°C | This study | Pending |
| PMY335/PMY336 | *TIF11/SUI3-2* | SC, 30°C | This study | Pending |
| PMY316 | *tif11-R13P/*  *SUI3-2* | SC, 30°C | This study | Pending |
|  | | | | |
| ***sui1-L96P experiment*** | | | | |
| PMY30 | *SUI1* | SC, 30°C | This study | Pending |
| PMY33 | *sui1-L96P* | SC, 30°C | This study | Pending |
|  | | | | |
| ***sui1-T15A* experiment** | | | | |
| FZY012/FZY013 | *SUI1/SUI3* | SC, 30°C | This study | Pending |
| FZY014/FZY015 | *sui1-T15A/SUI3* | SC, 30°C | This study | Pending |
| PMY71 | *SUI1/SUI3-2* | SC, 30°C | This study | Pending |
| PMY72 | *sui1-T15A/SUI3-2* | SC, 30°C | This study | Pending |
|  | | | | |
| **WT experiments** | | | | |
| BY4741 | WT | SC, 20°C/25°C/30°C/36°C | This study | Pending |
|  |  |  |  |  |
| ***tif1-ts-* experiment** | | | | |
| NSY20 | *TIF1* | SC, 30°C |  | GSE66411 |
|  |  | SC, 30°C to 37°C shift |  | GSE66411 |
| NSY21 | *tif1-A79V* | SC, 30°C |  | GSE66411 |
|  |  | SC, 30°C to 37°C shift |  | GSE66411 |
|  | | | | |
| ***ded1-cs-* experiment** | | | | |
| F2041/yRP2799 | *DED1* | SC, 30°C to 37°C shift |  | GSE66411 |
| NSY5 | *ded1-120* | SC, 30°C to 37°C shift |  | GSE66411 |
|  | | | | |
| ***dom34* experiment** | | | | |
| YNG100 | *ski2Δ* | YPD, 30°C |  | GSE52968 |
| YNG103 | *dom34Δ/ski2Δ* | YPD, 30°C |  | GSE52968 |
|  | | | | |
| **Rli1depletion experiment** | | | | |
| YDY128 | WT | YPD, 30°C |  | GSE69414 |
| YDY130 | PGAL-UBI-R-FH-RLI1 | YPD, 30°C |  | GSE69414 |
|  | | | | |
| ***tif3Δ* experiment** | | | | |
| BY4741 | WT | SC, 30°C to 37°C shift |  | GSE81966 |
|  |  | YPD, 23°C | This study | Pending |
| FJZ052 | *tif3Δ* | SC, 30°C to 37°C shift |  | GSE81966 |
|  |  | YPD, 23°C | This study | Pending |
|  | | | | |
| **Analysis of cycloheximide effects in WT cells (X1 cycloheximide and no cycloheximide data only)** | | | | |
| BY4741 | WT | YPD, 30°C |  | GSE59573 |

**Ribosome profiling datasets references**

Gerashchenko MV, Gladyshev VN. 2014. Translation inhibitors cause abnormalities in ribosome profiling experiments. *Nucleic Acids Res* **42**: e134.

Guydosh NR, Green R. 2014. Dom34 rescues ribosomes in 3' untranslated regions. *Cell* **156**: 950-962.

Sen ND, Zhou F, Harris MS, Ingolia NT, Hinnebusch AG. 2016. eIF4B stimulates translation of long mRNAs with structured 5' UTRs and low closed-loop potential but weak dependence on eIF4G. *Proc Natl Acad Sci U S A* **113**: 10464-10472.

Sen ND, Zhou F, Ingolia NT, Hinnebusch AG. 2015. Genome-wide analysis of translational efficiency reveals distinct but overlapping functions of yeast DEAD-box RNA helicases Ded1 and eIF4A. *Genome Res* **25**: 1196-1205.

Young DJ, Guydosh NR, Zhang F, Hinnebusch AG, Green R. 2015. Rli1/ABCE1 Recycles Terminating Ribosomes and Controls Translation Reinitiation in 3'UTRs In Vivo. *Cell* **162**: 872-884.
