# Supplementary figures and images for: eIF1A residues implicated in cancer stabilize translation preinitiation complexes and favor suboptimal initiation sites in yeast
Source: eLife journal article supplement (doi:10.7554/elife.31250), 2017-12-05

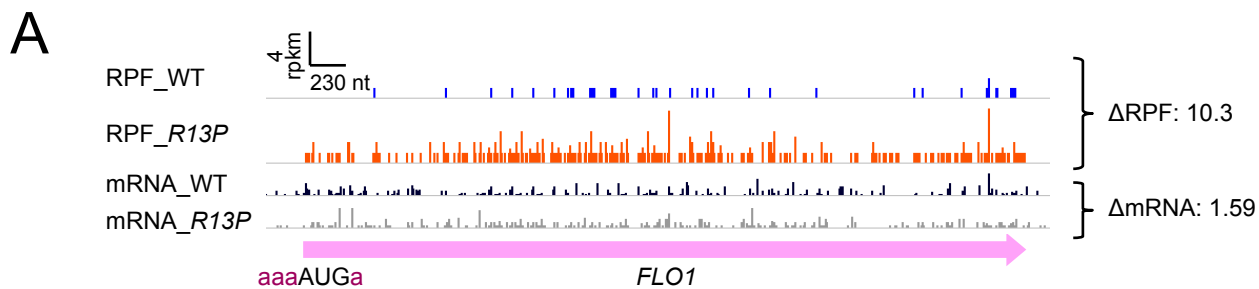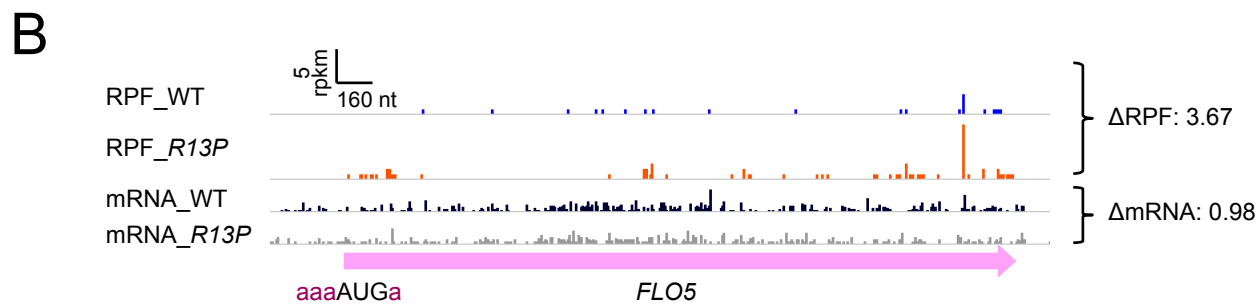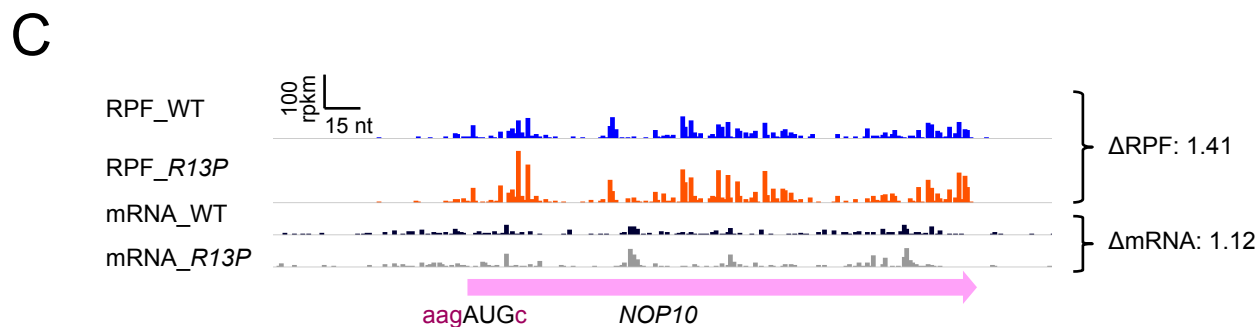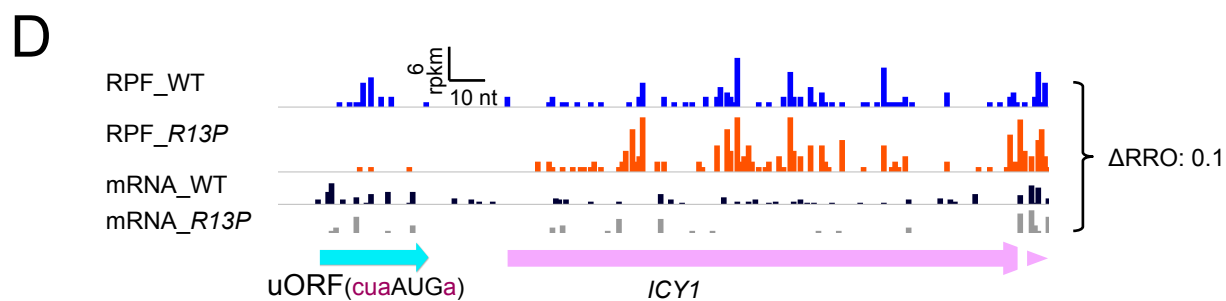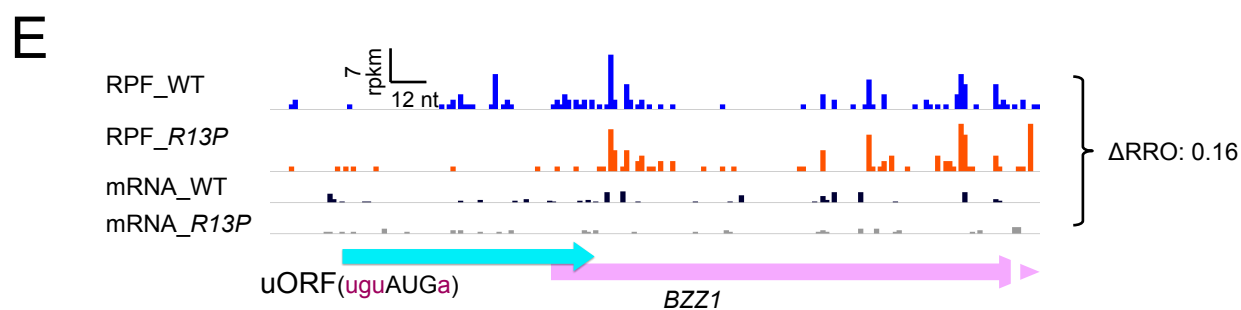

Figure 6-figure supplement 3

Supplement: supp [file elife-31250-supp-v1.zip › elife_poa_e31250_Figure_6_figure_supplement_3.pdf]

A

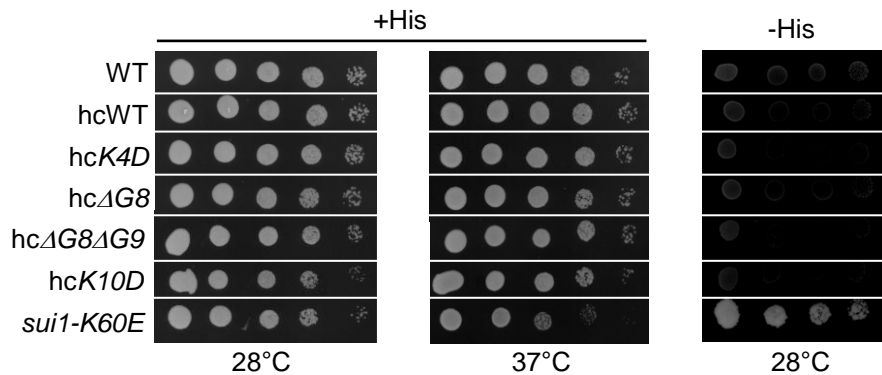

B

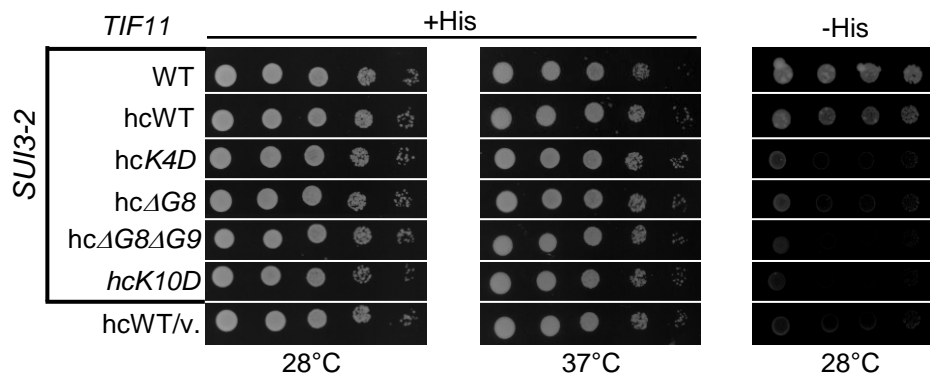

C

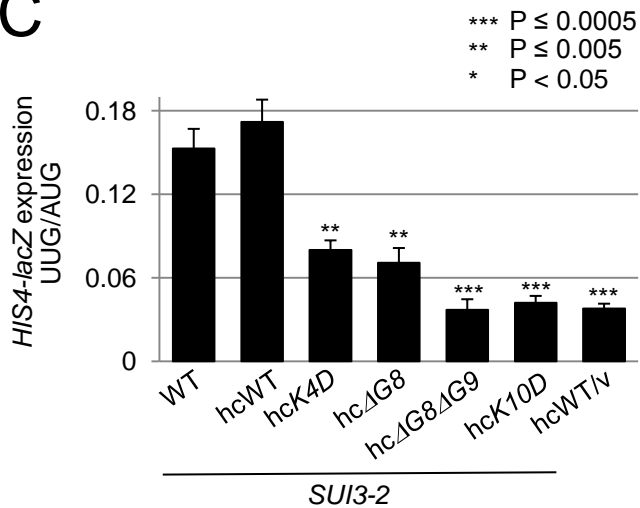

D

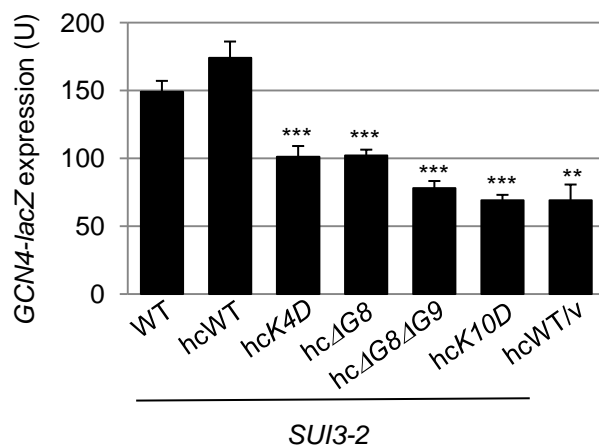

Figure 4-figure supplement 2

Supplement: supp [file elife-31250-supp-v1.zip › elife_poa_e31250_Figure_4_figure_supplement_2.pdf]

A

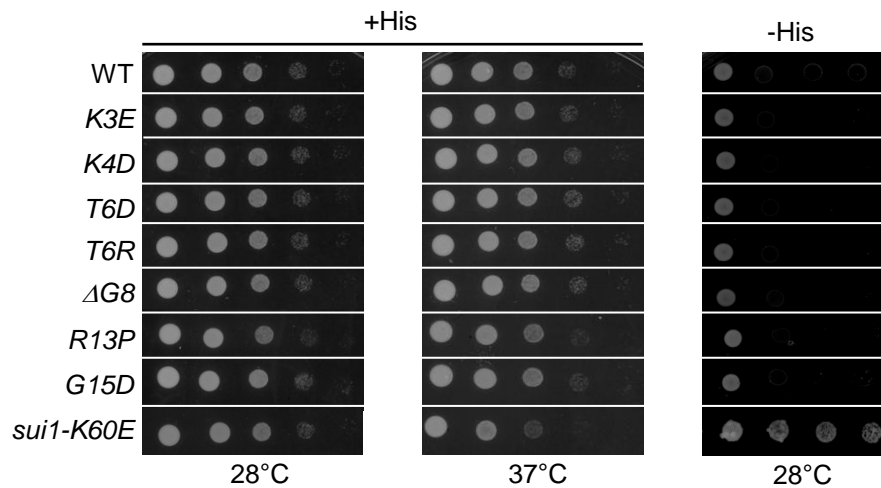

B

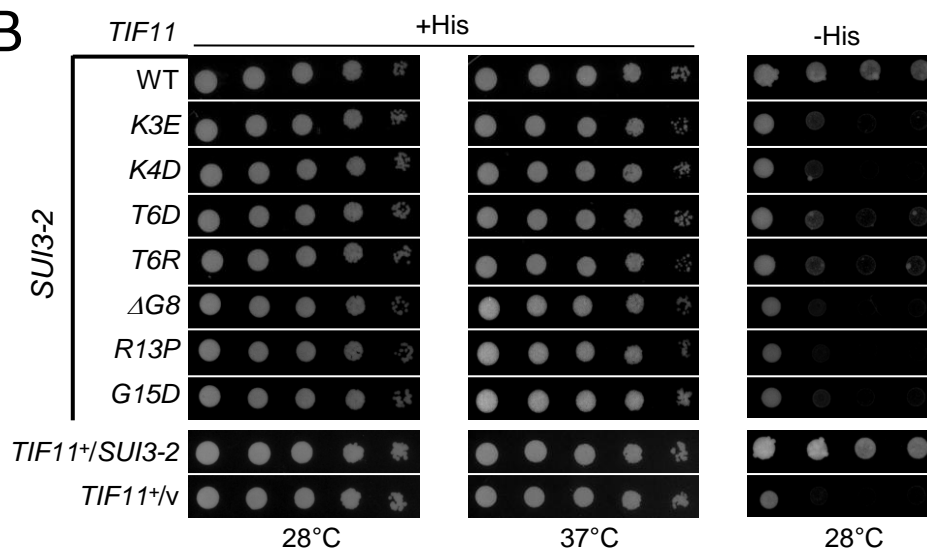

C

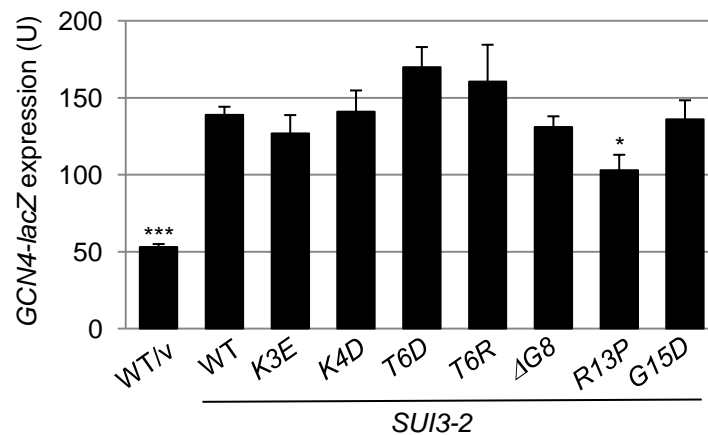

Supplement: supp [file elife-31250-supp-v1.zip › elife_poa_e31250_Figure_2_figure_supplement_1.pdf]

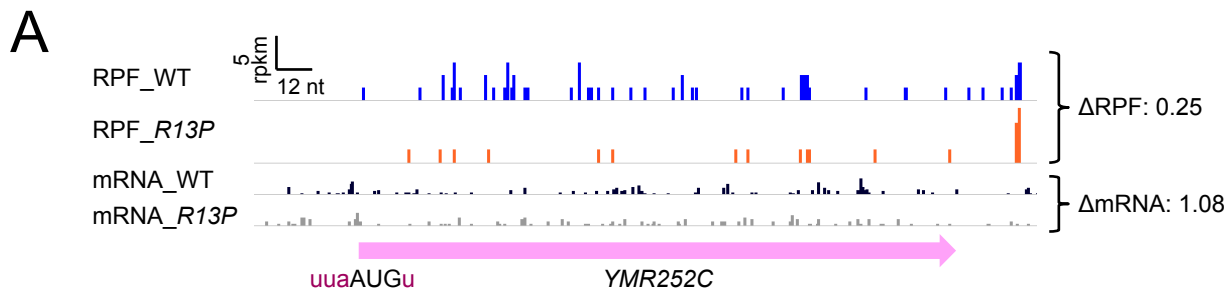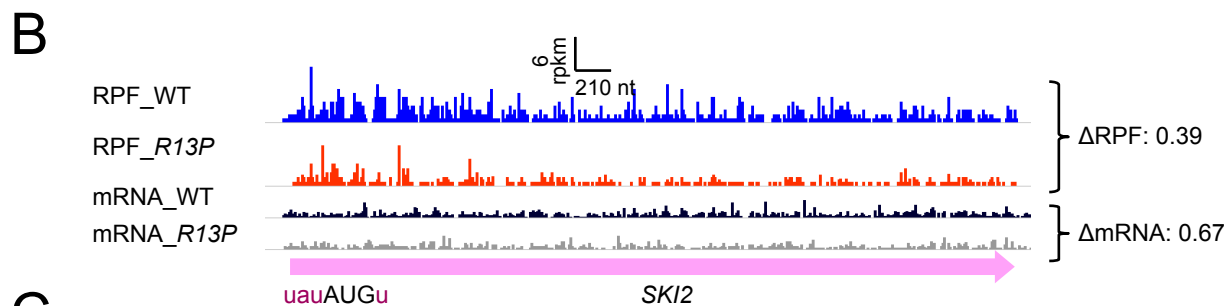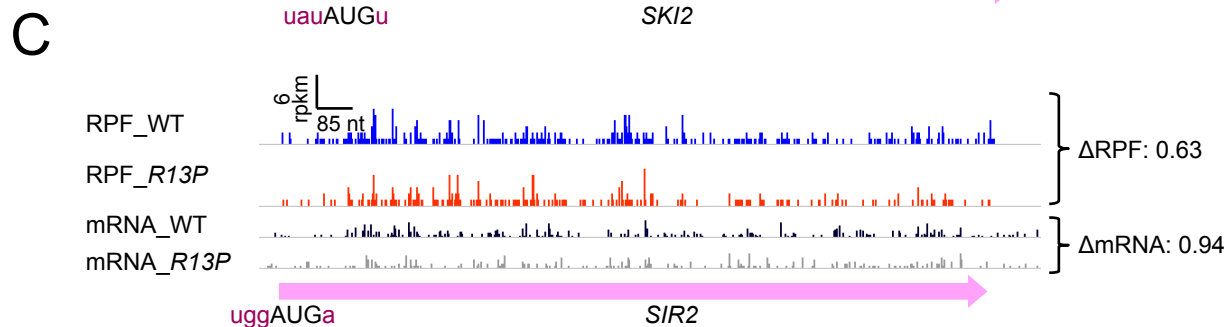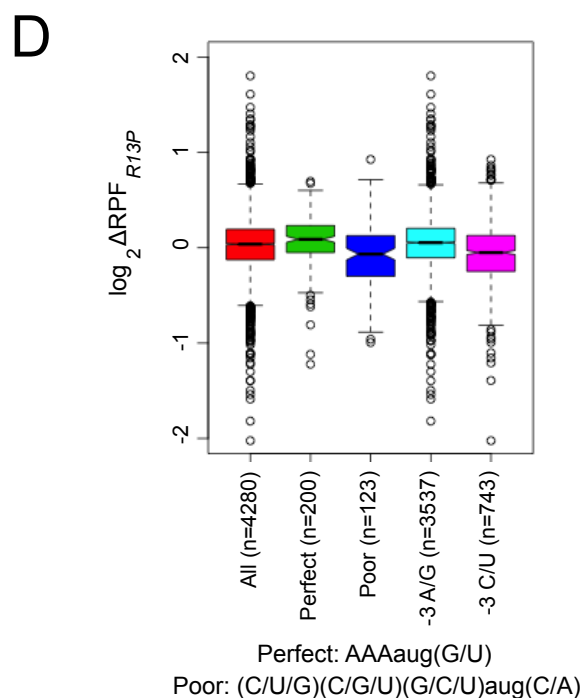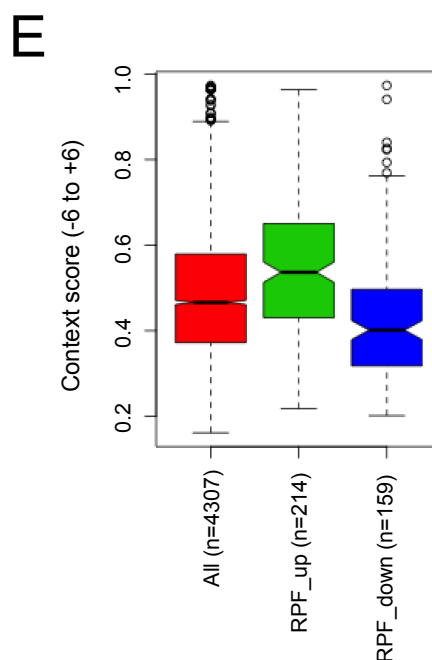

Figure 6-figure supplement 2

Supplement: supp [file elife-31250-supp-v1.zip › elife_poa_e31250_Figure_6_figure_supplement_2.pdf]

A

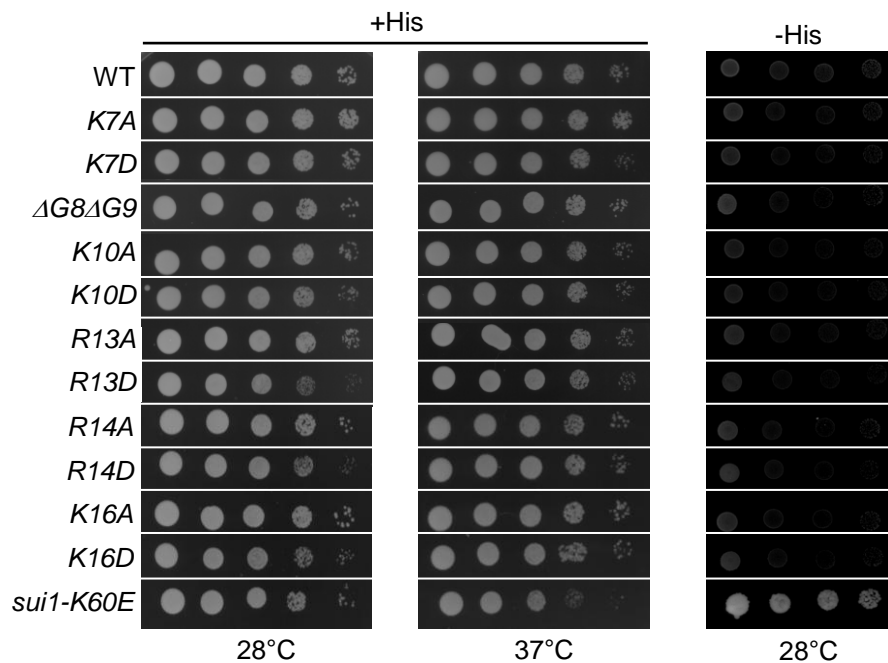

B

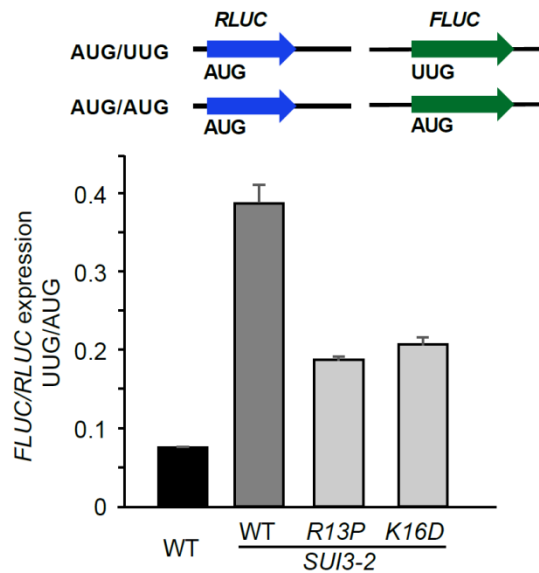

Supplement: supp [file elife-31250-supp-v1.zip › elife_poa_e31250_Figure_3_figure_supplement_1.pdf]

A

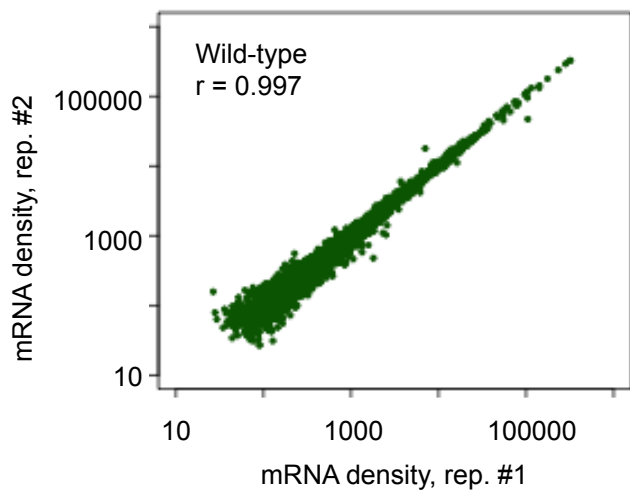

B

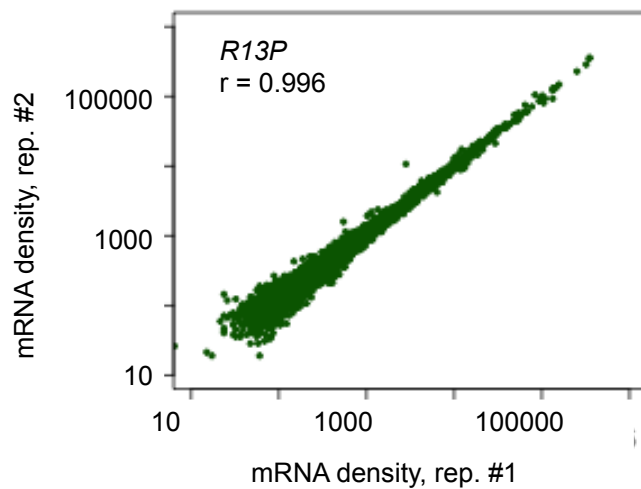

C

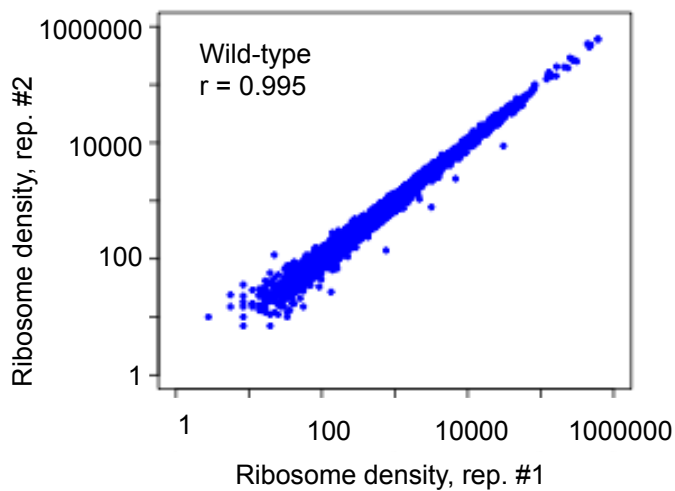

D

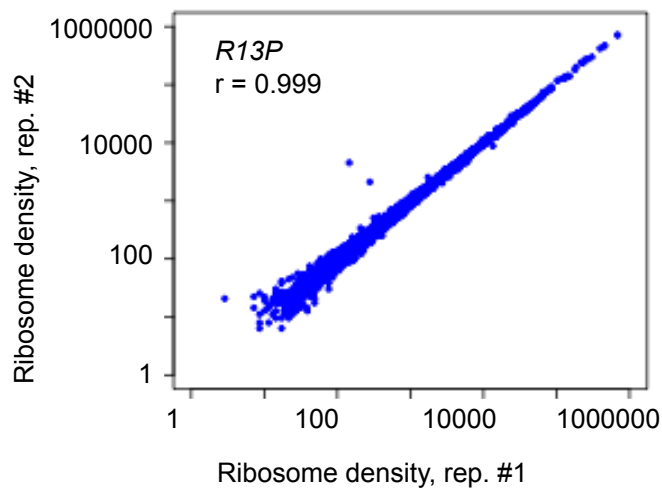

Figure 6-figure supplement 1

Supplement: supp [file elife-31250-supp-v1.zip › elife_poa_e31250_Figure_6_figure_supplement_1.pdf]

A

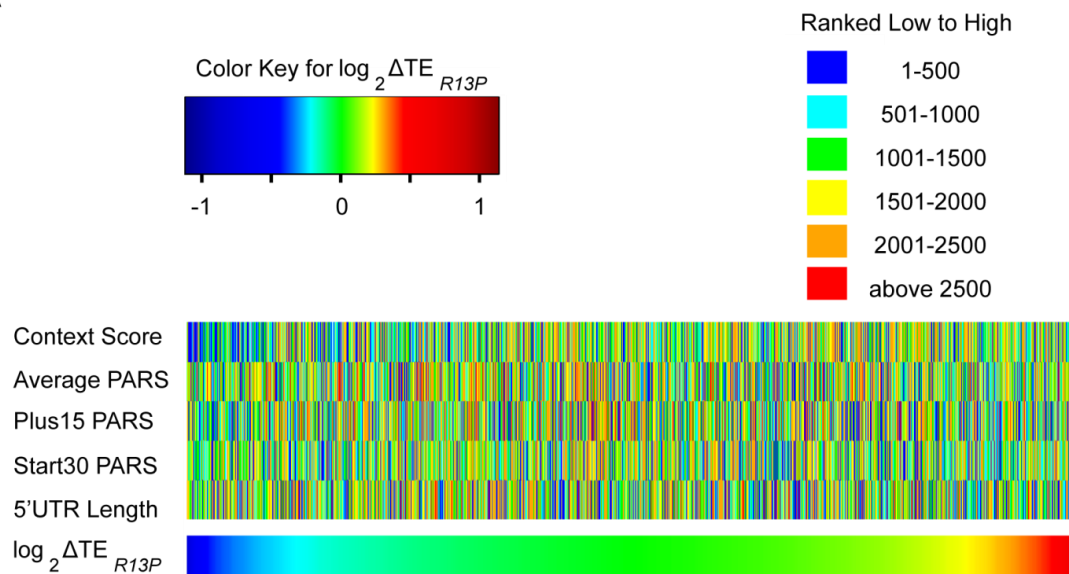

B

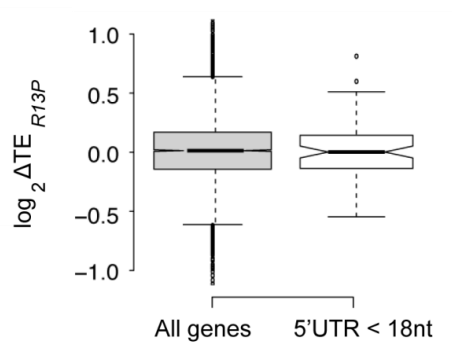

C

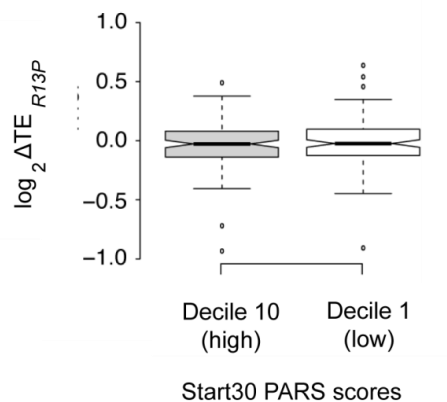

D

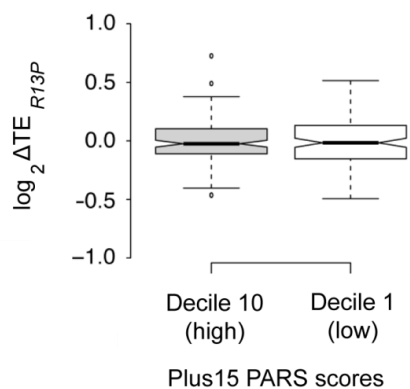

Supplement: supp [file elife-31250-supp-v1.zip › elife_poa_e31250_Figure_6_figure_supplement_4.pdf]

A

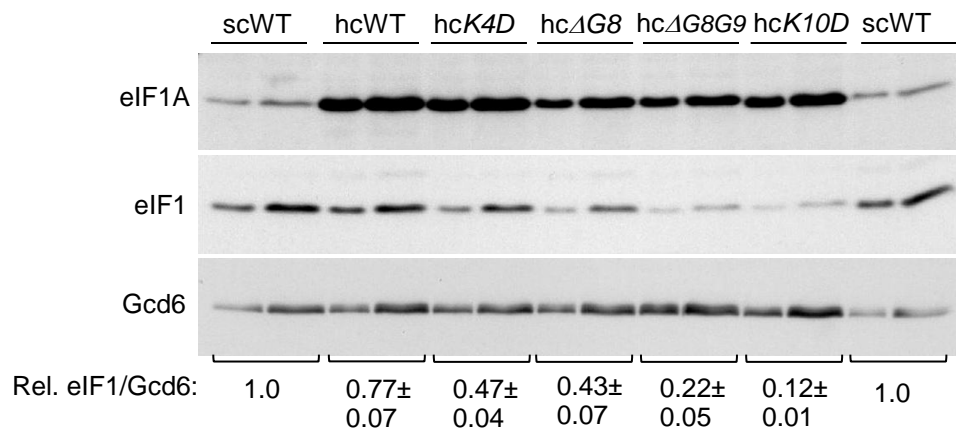

B

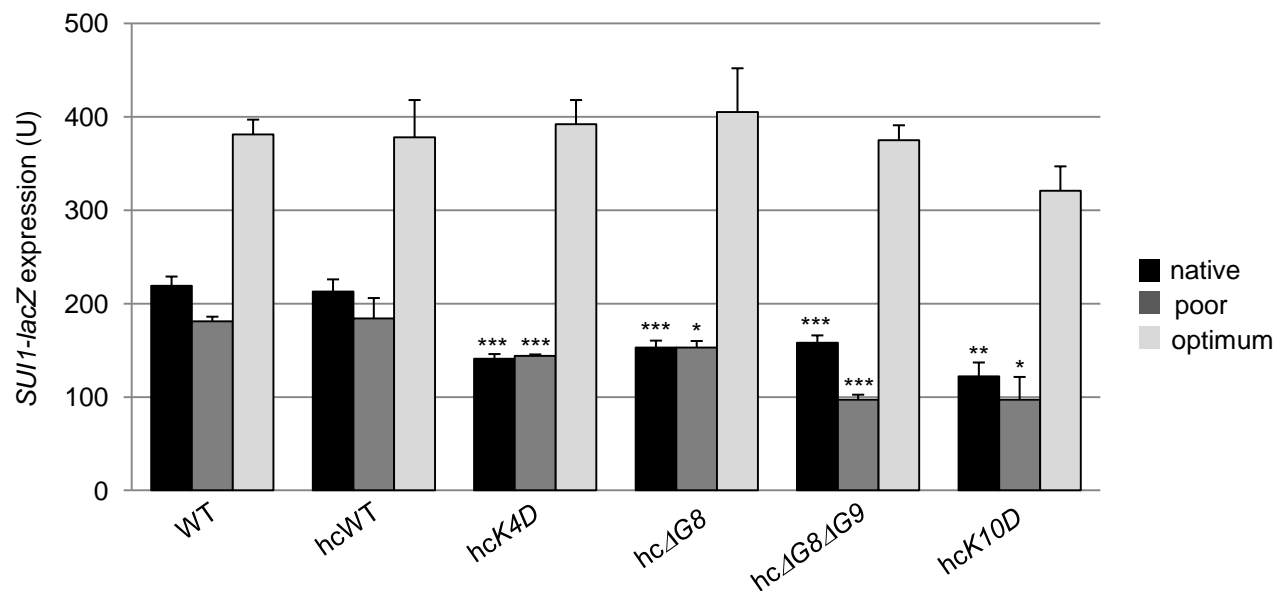

Figure 4-figure supplement 1

Supplement: supp [file elife-31250-supp-v1.zip › elife_poa_e31250_Figure_4_figure_supplement_1.pdf]
